# Supplementary material for: T-REX17 is a transiently expressed non-coding RNA essential for human endoderm formation
Source: eLife journal article supplement (doi:10.7554/elife.83077), 2023-01-16
Supplement: fig4-data1 [file Quantification.xlsx]

## Sheet: rel. WB band-intensity quant.
	Day 0
		GAPDH	JNK		GAPDH	pJNK			n-fold (-355/ctrl)		log2fc (-355/ctrl)
	sgCtrl	12775.6	2581.47	0.202063	13279	2488.73	0.187418	0.927522
	sgLNCSOX17	7237.93	1422.41	0.196521	8334.96	2017.05	0.241998	1.23141	1.32763		0.408858
	sgCtrl	12213.6	3612.08	0.295741	12201.4	6380.68	0.522947	1.76826
	sgLNCSOX17	12343.1	3813.15	0.308931	14100.3	8005.68	0.567767	1.83784	1.03935		0.0556882
	Day 3
		GAPDH	JNK		GAPDH	pJNK			n-fold (-355/ctrl)		log2fc (-355/ctrl)
	sgCtrl	40738.5	13952.4	0.342486	31375.9	2411.02	0.0768432	0.224369
	sgLNCSOX17	39037.1	12199	0.312499	38962.7	2566.21	0.0658633	0.210764	0.939361		-0.0902477
	sgCtrl	32436.9	14903.5	0.459461	48887.7	3625.95	0.0741691	0.161426
	sgLNCSOX17	39468.2	11887.3	0.301188	42497.7	2281.05	0.0536747	0.17821	1.10397		0.142705
	Day 5
		GAPDH	JNK		GAPDH	pJNK			n-fold (-355/ctrl)		log2fc (-355/ctrl)
	sgCtrl	1149.86	14001.3	12.1765	1073.69	2853.1	2.6573	0.218231
	sgLNCSOX17	946.772	11897.4	12.5663	903.84	4309.52	4.76801	0.379428	1.73865		0.79797
	sgCtrl	1266.66	11372.7	8.9785	1644.78	3608.29	2.19379	0.244338
	sgLNCSOX17	956.256	11076.2	11.5828	909.926	6811.17	7.48542	0.646251	2.64491		1.40322
