# Supplementary material for: T-REX17 is a transiently expressed non-coding RNA essential for human endoderm formation
Source: eLife. 2023 Jan 31;12:e83077. doi: 10.7554/eLife.83077 (PMC9889090; doi:10.7554/eLife.83077)
Supplement: Supplementary file 1. — Luciferase assay raw and normalized data for eSOX17, eSOX17.1, eSOX17.1, pSOX17 and pT-REX17 of respective day of endodermal differentiation. Cell fractionation RT-PCR relative band-intensity quantification. MinION split reads extracted from IGV junctions-track BAM files. T-REX17 isoform sequences. Wetsern Blot relative band-intensity quantification. [file elife-83077-supp1.xlsx]

## Sheet: External GSM
Figure	Datatype	Cell Line /Tissue	Cell Type	GSM#
1a	CTCF-ChIP	HuES64	PSC	GSM1505622
1a	CTCF-ChIP	HuES64	EN	GSM1505625
1a	WGBS	HuES64	PSC	GSM1112840
1a	WGBS	HuES64	EN	GSM916051
1a	H3K36me3	HuES64	PSC	GSM669932
1a	H3K36me3	HuES64	EN	GSM772912
1a	H3K4me3	HuES64	PSC	GSM669967
1a	H3K4me3	HuES64	EN	GSM772978
1b	ATAC	H1	EN	GSM3630246/7
1b	H3K27ac	H1	EN	GSM3630258/9
1b	FOXA2	H1	EN	GSM3630252/3
Extended Data Figure	Datatype	Cell Line	Cell Type	GSM#/SRA
1a	RNA	IDG3.2 ES	Mouse - Definitive Endoderm	GSM5696307-9
1a	RNA	Primary tissue	Chicken - HH4	SRX893876
1a	RNA	Primary tissue	Frog - XT11	DRX029699
Fig & Extended Data Figure	Datatype	Cell Line	Cell Type	GSM#
2a	RNA		aPS	GSM1273673
2a	RNA		AFG	GSM1273675
2a	RNA		PFG	GSM1273676
2a	RNA		MHG	GSM1273677
2a	RNA		Thymus	GSM1010944
2a	RNA		Definitive Endoderm	GSM1112847
2a	RNA		Pancreatic Islets	GSM1127105
2a	RNA		Ovary	GSM2343138
2a	RNA		Stomach	GSM2343737
2a	RNA		Pancreas	GSM2344001
2a	RNA		Mesoderm	GSM1112833
2a	RNA		Small Intestine	GSM1120314
2a	RNA		Mesendoderm	GSM915324-25
2a	RNA		HUVEC	GSM758563
2a	RNA		Adult Liver	GSM2072372
2a	RNA		Lung	GSM2072332
2a	RNA		Mesenchymal Stem Cells	GSM915322-23
2a	RNA		Ectoderm	GSM1112844
2a	RNA		Trophoblast Cells	GSM915320-21
2a	RNA	H1	PSC	GSM915328-29
2a	RNA		NHEK	GSM765401
2a	RNA		Breast Myoepithel	GSM669621
2a	RNA		NHLF	GSM765394
2a	RNA	HuES64	PSC	GSM1112837
2a	RNA		Esophagus	GSM2343602
2a	RNA		Aorta	GSM1010952
2a	RNA		Sigmoid Colon	GSM2344258
2a	RNA		Peyer's Patch	GSM2344171
2a	RNA		Transverse Colon	GSM2343980
Extended Data Fig	Datatype	Cell Line	Cell Type	GSM#
2b	RNA	HUES8	Definitive Endoderm	GSM4146877
2b	RNA	HUES8	Endocrine Progenitors	GSM4146880
2b	RNA	HUES8	Early Pancreatic Progenitors	GSM4146878
2b	RNA	HUES8	Late Pancreatic Progenitors	GSM4146879
2b	RNA	HUES8	PSC	GSM4146876
2b	RNA	HUES8	Primary α-cell	GSM4146883
2b	RNA	HUES8	Primary β-cell	GSM4146884
2b	RNA	HUES8	Polyhormonal cells	GSM4146882
2b	RNA	HUES8	PSC β-cell (SC-β)	GSM4146881

## Sheet: Luciferase assay data
Day 0
Firefly
		1	2	3	4	5	6	7	8	9	10	11	12
	A	23751.1	24290.2	24831.3	24376.3	26282.3	27396.7	26442.6	27138.2	25566.8	24458.5	22400.6	21695.3
	B	409994	404363	411640	440304	445674	435794	385269	381534	381605	406889	418189	412018
	C	127335	124274	126727	124007	114414	113324	141579	143159	142664	115301	117007	120018
	D
	E	41327.9	38268	39092.6	43413.1	46032.7	43589.8	40509.2	41458.4
	F	159393	164920	155007	148292	151183	153877	156212	155451
	G	335447	344949	304306	290913	286435	296417	260818	271219
	H	84769.6	84532	85494.6	88767.9	119539	84048.7	86922.7	87545.1
Renilla
		1	2	3	4	5	6	7	8	9	10	11	12
	A	3264.44	3108.4	3272.44	3538.51	3600.53	3304.45	3334.46	3552.52	3198.42	3262.44	3006.37	2950.36
	B	8765.15	9375.6	8428.91	9087.38	8767.15	9045.35	7980.61	7868.54	7864.54	8392.89	8703.1	8613.04
	C	9565.75	8907.25	9509.71	7268.17	7390.24	7904.56	9145.43	9103.4	9499.7	6229.59	6265.61	6703.84
	D
	E	7882.55	7962.6	7454.28	9597.78	9179.45	9455.66	9269.52	9974.08
	F	12370.3	12532.4	11589.5	11641.6	10976.9	11489.4	12462.4	11619.5
	G	9259.51	9535.73	8773.16	8785.16	8224.77	8703.1	8781.16	8080.68
	H	8739.13	8635.06	9015.33	8394.89	8344.86	7412.25	8214.77	8296.82
Norm.														Average background			Norm.
	empty pGL4.15	7.2757	7.81437	7.58801	6.88886	7.29956	8.29085	7.9301	7.63914	7.99357	7.497	7.45105	7.35344	7.58514							Day 0 Average background
	pSOX17	46.7755	43.1293	48.8367	48.4522	50.8345	48.1788	48.2756	48.4885	48.5222	48.4802	48.0506	47.8365				pSOX17	6.16975	6.30354	6.46996	6.31442
	pT-REX17	13.3116	13.952	13.3261	17.0617	15.4818	14.3365	15.4808	15.7259	15.0177	18.5086	18.6745	17.9029				pT-REX17	1.90014	1.97167	1.98434	1.95205
Norm.														Average background			Norm.
	empty pGL4.27	5.24296	4.80597	5.24432	4.52324	5.01476	4.60992	4.37015	4.15661					4.74599							Day 0 Average background
	eSOX17	12.8851	13.1595	13.3748	12.7381	13.7728	13.393	12.5347	13.3785								eSOX17	2.76861	2.80264	2.73	2.76708
	eSOX17.1	36.2273	36.1744	34.686	33.1141	34.8259	34.0588	29.702	33.5639								eSOX17.1	7.52127	7.16386	6.66519	7.11677
	eSOX17.2	9.7	9.78939	9.48325	10.574	14.3249	11.3392	10.5813	10.5516								eSOX17.2	2.03489	2.54517	2.2264	2.26882
Day 2
Firefly
		1	2	3	4	5	6	7	8	9	10	11	12
	A	7696.43	7434.27	10380.4	11009	543497	550850	516928	604974	54569.8	59006.4	63267.7	83335.8
	B	7388.24	6743.86	10352.4	11477.4	528017	543587	518906	584189	54987.7	62835.5	59072.7	82208.2
	C	7380.23	6591.78	10292.3	11025	536002	543020	516357	603906	57340.5	61036.4	61404.2
	D
	E	10700.7	10924.9	10556.6	11595.5	11359.3	10910.9	12720.6	12386.3	12542.4
	F	187196	178822	181937	166280	165962	165964	215900	251509	212341
	G	146899	149871	146402	132494	128029	128243	112103	98713.9	108787
	H	79613	76925.9	77082.8	77197.6	77916.1	75557.3	72247.4	71816.8	72665.8
Renilla
		1	2	3	4	5	6	7	8	9	10	11	12
	A	3302.45	3196.42	5307.15	5119.07	22913.5	25937.6	23640.9	27344.6	9557.74	10238.3	8018.64	9647.81
	B	3114.4	3348.46	5179.1	5263.14	22029.9	27541.1	22673.1	27643.3	9059.36	10342.4	8090.68	9531.72
	C	3018.37	3286.44	5185.1	5377.19	22084	25568.8	22272.3	26568.9	10104.2	10066.2	8609.04
	D
	E	5303.15	5513.25	5181.1	6575.77	6565.77	6611.79	7218.14	8228.78	7898.56
	F	13559.5	13655.6	13385.3	12340.2	12796.7	13041	18598.2	19509.6	18626.2
	G	7790.49	7964.6	7722.45	7348.21	7914.57	7666.41	6909.96	6077.51	6849.92
	H	8006.63	8058.66	7456.28	8402.89	7864.54	8072.67	7280.17	7814.5	7722.45
Norm.														Average background			Norm.					Day 0 Norm.
	empty pGL4.15	2.33052	2.32581	1.95593	2.15059	2.37228	2.01402	1.99888	2.18071	2.4451	2.00575	1.98498	2.05033	2.15124
	pSOX17	23.7195	21.2375	21.8658	22.1241	23.9682	19.7373	22.8864	21.1331	24.2711	21.2376	23.1838	22.7298				pSOX17	10.3367	10.1947	10.6244		1.637	1.61451	1.68256
	pT-REX17	5.70949	5.7633	7.89008	8.63779	6.06971	6.07552	7.30133	8.6247	5.67492	6.0635	7.13253					pT-REX17	3.25401	3.26222	2.92404		1.66697	1.67117	1.49793
Norm.														Average background			Norm.					Day 0 Norm.
	empty pGL4.27	2.0178	1.98157	2.03752	1.76337	1.73008	1.65022	1.76231	1.50524	1.58794				1.78178
	eSOX17	13.8055	13.0951	13.5923	13.4747	12.9691	12.7263	11.6087	12.8916	11.4001							eSOX17	7.57536	7.32789	6.71618		2.73767	2.64823	2.42717
	eSOX17.1	18.8562	18.8171	18.958	18.0308	16.1764	16.7279	16.2234	16.2425	15.8815							eSOX17.1	10.5945	9.52886	9.04476		1.48867	1.33893	1.27091
	eSOX17.2	9.94338	9.54574	10.338	9.18703	9.90727	9.35964	9.92386	9.1902	9.40968							eSOX17.2	5.58001	5.32312	5.33618		2.45944	2.34621	2.35197
Day 3
Firefly
	Read 1
		1	2	3	4	5	6	7	8	9	10	11	12
	A	6531.75	6529.75	6337.65	4254.74	4196.72	4332.77	3390.47	3134.4	3198.42
	B	434151	398907	428071	347148	346553	337852	359704	343708	368527
	C	203358	194143	192481	207836	201450	203179	166140	163022	200617
	D
	E	4042.67	4428.8	4178.72	3654.55	3128.4	3028.38	3610.53	3226.43	3262.44
	F	2416690	2438430	2595360	2313150	2239940	2316970	1874500	1838040	1827670
	G	48514.3	47845.7	47399.9	38005.1	38097.4	42726.7	56145	52800.1	54156
	H	370133	356864	351786	858248	829995	863971	665981	684753	684009	268.003	138.001	144.001
Renilla
	Read 1
		1	2	3	4	5	6	7	8	9	10	11	12
	A	13211.2	13113	12844.8	9918.03	9127.41	9137.42	5899.43	5875.42	5535.26
	B	24494.6	23572.8	23779.2	20407.1	19459.5	19495.6	19008.8	17532.6	17620.7
	C	14110.2	14596.7	13990	18367.8	16933.8	17542.6	14885.1	15744.2	15423.7
	D
	E	16597.3	16789.6	15894.4	11695.6	11229.2	10908.9	7614.38	7452.28	7704.43
	F	10682.7	10798.8	11059	12015.9	12234.1	12534.4	11639.6	11207.1	11131.1
	G	8993.31	9703.86	10092.2	8420.91	7934.58	8158.73	9011.33	9253.51	8753.14
	H	3932.63	3856.61	3988.65	8062.67	7548.34	7316.19	6281.62	7064.05	7188.12	54.0001	84.0003	74.0002
Norm.														Average background			Norm.					Day 0 Norm.
	empty pGL4.15	0.49441	0.49796	0.493402	0.42899	0.459793	0.474179	0.574711	0.533477	0.577827				0.503861
	pSOX17	17.7244	16.9223	18.0019	17.0111	17.8089	17.3297	18.923	19.6039	20.9144							pSOX17	34.8301	34.5001	39.3239		5.51597	5.4637	6.22764
	pT-REX17	14.4121	13.3005	13.7585	11.3152	11.8963	11.582	11.1615	10.3544	13.0071							pT-REX17	27.4355	23.018	22.839		14.0547	11.7917	11.7
Norm.														Average background			Norm.					Day 0 Norm.
	empty pGL4.27	0.243574	0.263782	0.262905	0.312472	0.278595	0.277606	0.474173	0.432945	0.42345				0.329945
	eSOX17	226.225	225.806	234.683	192.507	183.09	184.849	161.045	164.007	164.195							eSOX17	693.766	566.202	494.271		250.721	204.62	178.625
	eSOX17.1	5.39449	4.93058	4.69669	4.51318	4.80144	5.23693	6.23049	5.70595	6.18704							eSOX17.1	15.176	14.701	18.3096		2.13243	2.06568	2.57274
	eSOX17.2	94.1184	92.5331	88.1968	106.447	109.957	118.09	106.021	96.9349	95.1583							eSOX17.2	277.671	337.93	301.175		122.386	148.945	132.746
Day 5
Firefly
	Read 1
		1	2	3	4	5	6	7	8	9	10	11	12
	A	84.0003	166.001	106	122.001	220.002	48.0001	202.002	72.0002
	B	3196.42	4916.99	3524.51	3926.63	4732.92	2352.23	5031.04	2422.24
	C	3188.42	4740.92	1256.06	1314.07	4728.92	3276.44	4718.91	3186.42
	D
	E	64.0002	70.0002	78.0002	162.001	128.001	144.001	258.003	274.003	252.003
	F	3634.54	3848.61	4046.67	9015.33	8763.15	9059.36	17398.4	16561.2	16507.2
	G	352.005	384.006	342.005	318.004	384.006	314.004	762.024	794.026	692.02
	H	19611.8	19096.9		18964.7	13637.6		15357.7	13457.4
Renilla
	Read 1
		1	2	3	4	5	6	7	8	9	10	11	12
	A	84.0003	168.001	64.0002	114.001	162.001	62.0002	134.001	92.0004
	B	162.001	242.002	160.001	194.002	228.002	120.001	240.002	126.001
	C	116.001	484.01	242.002	260.003	340.005	112.001	454.008	174.001
	D
	E	100	94.0004	100	184.001	142.001	170.001	264.003	290.003	272.003
	F	84.0003	106	78.0002	186.001	234.002	250.003	230.002	234.002	234.002
	G	102	104	130.001	170.001	148.001	152.001	176.001	134.001	146.001
	H	472.009	474.009		396.006	420.007		420.007	390.006
Norm.														Average background			Norm.					Day 0 Norm.
	empty pGL4.15	1	0.988095	1.65624	1.07017	1.35803	0.774193	1.50747	0.782607					1.1421
	pSOX17	19.7309	20.318	22.028	20.2402	20.7582	19.6018	20.9625	19.224								pSOX17	18.1177	17.6867	17.5932		2.86927	2.80101	2.7862
	pT-REX17	27.4861	9.79509	5.19029	5.05406	13.9084	29.2537	10.3939	18.3127								pT-REX17	12.3957	14.0723	12.5674		6.35011	7.20901	6.43807
Norm.														Average background			Norm.					Day 0 Norm.
	empty pGL4.27	0.640002	0.74468	0.780002	0.880435	0.901409	0.84706	0.977273	0.944828	0.926471				0.849129
	eSOX17	43.2682	36.3076	51.8803	48.4693	37.449	36.237	75.6446	70.7738	70.543							eSOX17	51.6043	47.9532	85.1701		18.6493	17.3299	30.7797
	eSOX17.1	3.45103	3.69237	2.63079	1.8706	2.59462	2.0658	4.32966	5.92552	4.73983							eSOX17.1	3.83694	2.56381	5.88643		0.539141	0.360249	0.82712
	eSOX17.2	41.5496	40.2881		47.8899	32.4699		36.5653	34.5056								eSOX17.2	48.1892	47.319	41.8493		21.2398	20.8562	18.4454

## Sheet: Cell fractionation assay data
Fraction		norm-pre-GAPDH	%pre-GAPDH		norm-post-GAPDH	%post-GAPDH		norm-MALAT1	%MALAT1		norm-XIST	%XIST		norm-T-REX17	%T-REX17
Cyt_1		1	4.74834		1	51.8135		1	20.79		1	1.27681		1	22.3214
NS_1		5.46	25.9259		0.63	32.6425		3.45	71.7256		38.02	48.5444		2.09	46.6518
Chr_1		14.6	69.3257		0.3	15.544		0.36	7.48441		39.3	50.1788		1.39	31.0268
Sum_1		21.06			1.93			4.81			78.32			4.48
Cyt_2		1	6.56599		1	49.2611		1	21.1864		1	2.7571		1	18.1488
NS_2		4.67	30.6632		0.66	32.5123		3.59	76.0593		15.43	42.542		2.85	51.7241
Chr_2		9.56	62.7708		0.37	18.2266		0.13	2.75424		19.84	54.7009		1.66	30.127
Sum_2		15.23			2.03			4.72			36.27			5.51

## Sheet: MinION spliced reads
Read #	Chr	Start	End	Strand	Isoform
1	chr8	55127102	55139691	-	1+2	Ex1+2	16	13,8%
2	chr8	55127111	55139692	+	1+2	Ex1+3	11	9,5%
3	chr8	55127126	55139676	+	1+2	Sloppy	89	76,7%
4	chr8	55127152	55139676	-	1+2
5	chr8	55127167	55139656	+	1+2
6	chr8	55127188	55139643	+	1+2
7	chr8	55126391	55138809	+	1+2
8	chr8	55127142	55139338	-	1+2
9	chr8	55127100	55139245	+	1+2
10	chr8	55127150	55139278	-	1+2
11	chr8	55127155	55139268	+	1+2
12	chr8	55129190	55139719	+	1+2
13	chr8	55129219	55139667	-	1+2
14	chr8	55129145	55139279	+	1+2
15	chr8	55129234	55139245	-	1+2
16	chr8	55131363	55139656	+	1+2
17	chr8	55123296	55140029	-	1+3
18	chr8	55124857	55139675	+	1+3
19	chr8	55125544	55140214	+	1+3
20	chr8	55125052	55139652	-	1+3
21	chr8	55125119	55139683	-	1+3
22	chr8	55125736	55140297	+	1+3
23	chr8	55125119	55139671	-	1+3
24	chr8	55125125	55139677	+	1+3
25	chr8	55125872	55140157	+	1+3
26	chr8	55125130	55139251	+	1+3
27	chr8	55125728	55139767	+	1+3
28	chr8	55118333	55134960	+	"Sloppy"
29	chr8	55128806	55139460	+	"Sloppy"
30	chr8	55118862	55128996	-	"Sloppy"
31	chr8	55125588	55134765	+	"Sloppy"
32	chr8	55123181	55132353	+	"Sloppy"
33	chr8	55122998	55132030	-	"Sloppy"
34	chr8	55127995	55136237	-	"Sloppy"
35	chr8	55133298	55139800	+	"Sloppy"
36	chr8	55134188	55139275	-	"Sloppy"
37	chr8	55119013	55122386	+	"Sloppy"
38	chr8	55118970	55121832	-	"Sloppy"
39	chr8	55136129	55138677	-	"Sloppy"
40	chr8	55133171	55135715	-	"Sloppy"
41	chr8	55136282	55138762	-	"Sloppy"
42	chr8	55119017	55121305	+	"Sloppy"
43	chr8	55118751	55120898	-	"Sloppy"
44	chr8	55118866	55120888	-	"Sloppy"
45	chr8	55118985	55120859	-	"Sloppy"
46	chr8	55119094	55120393	-	"Sloppy"
47	chr8	55118887	55120048	+	"Sloppy"
48	chr8	55120032	55121111	-	"Sloppy"
49	chr8	55118996	55119893	-	"Sloppy"
50	chr8	55138734	55139622	-	"Sloppy"
51	chr8	55119009	55119889	-	"Sloppy"
52	chr8	55120076	55120914	-	"Sloppy"
53	chr8	55119068	55119879	-	"Sloppy"
54	chr8	55119066	55119830	-	"Sloppy"
55	chr8	55120057	55120680	-	"Sloppy"
56	chr8	55120076	55120691	+	"Sloppy"
57	chr8	55134773	55135297	+	"Sloppy"
58	chr8	55139267	55139713	-	"Sloppy"
59	chr8	55139244	55139656	-	"Sloppy"
60	chr8	55139268	55139666	+	"Sloppy"
61	chr8	55139336	55139686	-	"Sloppy"
62	chr8	55139312	55139654	-	"Sloppy"
63	chr8	55139333	55139666	+	"Sloppy"
64	chr8	55138870	55139194	+	"Sloppy"
65	chr8	55140489	55140733	+	"Sloppy"
66	chr8	55137111	55137329	-	"Sloppy"
67	chr8	55138171	55138347	-	"Sloppy"
68	chr8	55124625	55124789	-	"Sloppy"
69	chr8	55120493	55120626	+	"Sloppy"
70	chr8	55136859	55136959	-	"Sloppy"
71	chr8	55132327	55132424	-	"Sloppy"
72	chr8	55131701	55139695	+	"Sloppy"
73	chr8	55125118	55132409	+	"Sloppy"
74	chr8	55133078	55140328	-	"Sloppy"
75	chr8	55133164	55139797	-	"Sloppy"
76	chr8	55122995	55127887	+	"Sloppy"
77	chr8	55129005	55133107	+	"Sloppy"
78	chr8	55127177	55131060	+	"Sloppy"
79	chr8	55133126	55136128	-	"Sloppy"
80	chr8	55133100	55136090	-	"Sloppy"
81	chr8	55133125	55136071	-	"Sloppy"
82	chr8	55128045	55130588	+	"Sloppy"
83	chr8	55125283	55127734	-	"Sloppy"
84	chr8	55125553	55127902	-	"Sloppy"
85	chr8	55123302	55125543	+	"Sloppy"
86	chr8	55127111	55129238	+	"Sloppy"
87	chr8	55125045	55127085	+	"Sloppy"
88	chr8	55127166	55129189	-	"Sloppy"
89	chr8	55123551	55125566	-	"Sloppy"
90	chr8	55125125	55127064	-	"Sloppy"
91	chr8	55125671	55127576	+	"Sloppy"
92	chr8	55125635	55127434	-	"Sloppy"
93	chr8	55127770	55129293	+	"Sloppy"
94	chr8	55125664	55127178	-	"Sloppy"
95	chr8	55132030	55133347	+	"Sloppy"
96	chr8	55125645	55126868	+	"Sloppy"
97	chr8	55125647	55126741	+	"Sloppy"
98	chr8	55125636	55126690	+	"Sloppy"
99	chr8	55128025	55128920	-	"Sloppy"
100	chr8	55128013	55128847	-	"Sloppy"
101	chr8	55125637	55126469	-	"Sloppy"
102	chr8	55125647	55126476	+	"Sloppy"
103	chr8	55125658	55126476	+	"Sloppy"
104	chr8	55125645	55126461	-	"Sloppy"
105	chr8	55120154	55120956	+	"Sloppy"
106	chr8	55125674	55126463	-	"Sloppy"
107	chr8	55120150	55120897	-	"Sloppy"
108	chr8	55133105	55133807	+	"Sloppy"
109	chr8	55127045	55127683	-	"Sloppy"
110	chr8	55120133	55120748	-	"Sloppy"
111	chr8	55125822	55126426	-	"Sloppy"
112	chr8	55120112	55120691	+	"Sloppy"
113	chr8	55120124	55120673	+	"Sloppy"
114	chr8	55120128	55120672	+	"Sloppy"
115	chr8	55121273	55121796	+	"Sloppy"
116	chr8	55127413	55127755	-	"Sloppy"

## Sheet: Isoform sequences
Isoform	Sequence
Ex1+2	AGTCTCCAGGTCTGTCCCCCTGAAGATGGTTCCTCTCACCACCTGGGCTGCCACCACGCTGGCCATGTAAGTAAGGATGGTTTACAGGCTCCTCCATCTGATTTGGGGACACTGGAAATCTCTTGTCTTTTCTCTGATTTTTATTAAGTATATATAAAACCTATGGCTCCTATTTCAAGAGAGAAGGCCCAGGAAAAACTATCTTTGGAACTGCCAAGCCAGAGCTACTGCCTCCCTGCAAAGCCACCTTTGGAACTACAAGGACACTCTATACACATGGAAGATGCTCTTAAGGCTTTTAAGTATATCAGTGGATGGTTTGATACTTTCATTCTAAAGGGAATATAAAGGCCAACTTCAACTGCAAGAGATTGTTTTGCTGTACATAAGCCTGGAATG…
Ex1+3	AGTCTCCAGGTCTGTCCCCCTGAAGATGGTTCCTCTCACCACCTGGGCTGCCACCACGCTGGCCATGTAAGTAAGGATGGTTTACAGGCTCCTCCATCTGATTTGGGGACACTGGAAATCTCTTGTCTTTTCTCTGATTTTTATTAAGTATATATAAAACCTATGGCTCCTATTTCAAGAGAGAAGGCCCAGGAAAAACTATCTTTGGAACTGCCAAGCCAGAGCTACTGCCTCCCTGCAAAGCCACCTTTGGAACTACAAGGACACTCTATACACATGGAAGATGCTCTTAAGGCTTTTAAGTATATCAGTGGATGGTTTGATACTTTCATTCTAAAGGGAATATAAAGGCCAACTTCAACTGCAAGAGATTGTTTTGCTGTACATAAGCCTGGAATG…

## Sheet: WB band intensity quant
	Day 0
		GAPDH	JNK		GAPDH	pJNK				n-fold (-355/ctrl)		log2fc (-355/ctrl)
	sgCtrl	12775.6	2581.47	0.202063	13279	2488.73	0.187418	0.927522
	sgT-REX17	7237.93	1422.41	0.196521	8334.96	2017.05	0.241998	1.23141		1.32763		0.408858
	sgCtrl	12213.6	3612.08	0.295741	12201.4	6380.68	0.522947	1.76826
	sgT-REX17	12343.1	3813.15	0.308931	14100.3	8005.68	0.567767	1.83784		1.03935		0.0556882
	Day 3
		GAPDH	JNK		GAPDH	pJNK				n-fold (-355/ctrl)		log2fc (-355/ctrl)
	sgCtrl	40738.5	13952.4	0.342486	31375.9	2411.02	0.0768432	0.224369
	sgT-REX17	39037.1	12199	0.312499	38962.7	2566.21	0.0658633	0.210764		0.939361		-0.0902477
	sgCtrl	32436.9	14903.5	0.459461	48887.7	3625.95	0.0741691	0.161426
	sgT-REX17	39468.2	11887.3	0.301188	42497.7	2281.05	0.0536747	0.17821		1.10397		0.142705
	Day 5
		GAPDH	JNK		GAPDH	pJNK				n-fold (-355/ctrl)		log2fc (-355/ctrl)
	sgCtrl	1149.86	14001.3	12.1765	1073.69	2853.1	2.6573	0.218231
	sgT-REX17	946.772	11897.4	12.5663	903.84	4309.52	4.76801	0.379428		1.73865		0.79797
	sgCtrl	1266.66	11372.7	8.9785	1644.78	3608.29	2.19379	0.244338
	sgT-REX17	956.256	11076.2	11.5828	909.926	6811.17	7.48542	0.646251		2.64491		1.40322
