# Supplementary material for: T-REX17 is a transiently expressed non-coding RNA essential for human endoderm formation
Source: eLife. 2023 Jan 31;12:e83077. doi: 10.7554/eLife.83077 (PMC9889090; doi:10.7554/eLife.83077)
Supplement: Supplementary file 2. [file elife-83077-supp2.xlsx]

## Sheet: RNAseq TPM values EN
#chr	start	end	gene_name	gene_ID	strand	D0_sgCtrl_rep1	D0_sgCtrl_rep2	D0_sgCtrl_rep3	D0_sgT-REX17_rep1	D0_sgT-REX17_rep2	D0_sgT-REX17_rep3	D3_sgCtrl_rep1	D3_sgCtrl_rep2	D3_sgCtrl_rep3	D3_sgT-REX17_rep1	D3_sgT-REX17_rep2	D3_sgT-REX17_rep3	D5_sgCtrl_rep1	D5_sgCtrl_rep2	D5_sgCtrl_rep3	D5_sgT-REX17_rep1	D5_sgT-REX17_rep2	D5_sgT-REX17_rep3
chr1	11869	14412	DDX11L1	ENSG00000223972.4	+	0.043299	0	0.042462	0.019247	0.03735	0.045471	0.053125	0.047545	0.038218	0.036808	0	0.073353	0.096853	0.063516	0.060881	0.188954	0.014347	0.027387
chr1	14363	29806	WASH7P	ENSG00000227232.4	-	14.8145	14.0317	13.4141	14.296	14.4063	12.4825	17.4064	15.0816	15.3882	15.2779	11.1744	14.1886	24.3739	18.9886	21.0129	23.2232	21.8512	24.2881
chr1	29554	31109	MIR1302-11	ENSG00000243485.2	+	0.457445	0.596934	0.536786	0.407093	0.251707	0.428107	0.562105	0.329725	0.382073	0.55426	0.658511	0.762001	0.682248	0.318504	0.635491	0.53691	0.641083	0.387994
chr1	34554	36081	FAM138A	ENSG00000237613.2	-	0.17022	0.037636	0.184862	0.171468	0.16857	0.157207	0	0	0	0	0.020114	0.021315	0.03107	0	0	0.018826	0.017412	0
chr1	52473	54936	OR4G4P	ENSG00000268020.2	+	0.041656	0	0	0	0.002843	0.062065	0	0	0	0	0	0	0	0	0	0	0.015651	0
chr1	62948	63887	OR4G11P	ENSG00000240361.1	+	0	0	0	0	0	0	0	0	0	0	0	0	0	0	0	0	0	0
chr1	69091	70008	OR4F5	ENSG00000186092.4	+	0	0	0	0	0	0	0	0	0	0	0	0	0	0	0	0	0	0
chr1	89295	133566	RP11-34P13.7	ENSG00000238009.2	-	0.364411	0.087681	0.136985	0.455705	1.00947	0.509109	0.442765	0.354504	0.666028	1.02305	0.780521	0.93681	0.307189	0.70853	0.160596	0.254239	0.267174	1.12589
chr1	89551	91105	RP11-34P13.8	ENSG00000239945.1	-	0	0	0	0	0.00141	0	0	0	0.002827	0	0.000443	0	0	0	0	0	0	0.003488
chr1	131025	134836	CICP27	ENSG00000233750.3	+	0	0	0.009441	0	0	0	0.015828	0	0.015581	0.029649	0	0.051739	0.014399	0	0	0.026286	0	0.035897
chr1	134901	139379	AL627309.1	ENSG00000237683.5	-	12.4844	9.14668	7.56216	16.9682	13.451	13.2993	23.5562	14.5846	18.6712	17.463	12.3965	19.7505	25.4012	13.7091	21.0795	53.7434	26.0558	39.7402
chr1	135141	135895	RP11-34P13.15	ENSG00000268903.1	-	1.67635	1.42127	1.12849	1.81309	1.53941	1.94753	3.24608	2.31081	2.76883	2.29934	1.92497	2.60887	3.49141	1.8781	3.61037	8.94986	4.99759	8.36541
chr1	137682	137965	RP11-34P13.16	ENSG00000269981.1	-	0.21436	0.0147	0.011934	0.081924	0.072157	0.135416	0.037072	0.009641	0.024781	0.07509	0.009034	0.013781	0.136653	0.008874	0.101741	0.300447	0.10971	0.015328
chr1	139790	140339	RP11-34P13.14	ENSG00000239906.1	-	2.91462	3.11909	1.89793	3.68112	3.10482	4.1416	5.88715	4.23003	4.65846	6.02528	3.06523	7.37327	6.08011	2.60794	4.53401	11.5285	7.31257	10.7505
chr1	141474	173862	RP11-34P13.13	ENSG00000241860.2	-	7.55255	5.82094	4.62796	10.706	6.2451	9.79072	14.2448	10.2532	12.9043	13.3145	9.68528	15.6486	11.5881	7.41793	9.9004	26.6667	13.2254	23.4609
chr1	157784	157887	RNU6-1100P	ENSG00000222623.1	-	1.0828	0.114869	0.15212	0.295413	0.009283	0.130549	1.35858	0.291359	0.28972	1.22704	0.549548	0.574682	0.661626	0.268131	1.13194	2.19853	1.03211	1.40903
chr1	160446	161525	RP11-34P13.9	ENSG00000241599.1	+	0	0	0	0	0	0	0	0	0	0	0	0	0	0	0	0	0	0
chr1	227615	267253	AP006222.2	ENSG00000228463.4	-	0.458828	0.426519	0.664733	0.55125	0.481577	0.507755	0.893541	1.09222	0.840049	1.14431	0.928467	1.19714	1.02716	0.912875	0.654288	0.936931	0.928727	0.843143
chr1	228292	228775	AP006222.1	ENSG00000241670.2	-	0.509914	0.570799	0.620678	0.549438	0.774373	0.370731	0.89105	1.07457	0.77817	0.379749	0.65686	0.440663	0.547915	0.351667	0.80978	1.01226	0.919655	0.927903
chr1	317720	453948	RP4-669L17.10	ENSG00000237094.7	+	22.3442	17.5008	15.1522	30.24	25.3529	27.1479	41.7963	27.0595	32.571	33.5398	23.0542	40.0545	39.9044	23.0417	31.2775	59.1157	33.2436	52.2952
chr1	326096	328112	RP4-669L17.8	ENSG00000250575.1	+	1.24928	0.871774	0.742811	0	1.13651	1.42392	1.72236	1.20444	1.43322	0	1.04391	1.65129	2.13465	1.04688	1.85911	3.38776	1.58028	2.39239
chr1	329431	332236	CICP7	ENSG00000233653.3	-	0	0	0	0	0	0	0	0	0	0	0	0	0	0	0	0	0	0
chr1	334126	334305	RP4-669L17.4	ENSG00000224813.2	+	0.00336	0.00519	0.00701	0.005935	0.001447	0.002024	0.005295	0.002038	0.002797	0.002958	0.004938	0.003993	0.000987	0.00105	0.001402	0.004631	0.001874	0.000195
chr1	367640	368634	OR4F29	ENSG00000235249.1	+	0	0	0	0	0	0	0	0	0	0	0	0	0	0	0	0	0	0
chr1	379105	379467	WBP1LP7	ENSG00000269732.1	-	0	0	0	0	0	0	0	0	0	0	0	0	0	0	0	0	0	0
chr1	450820	450910	AL732372.1	ENSG00000256186.1	-	0	0	0	0	0	0	0	0	0	0	0	0	0.082657	0	0	0	0	0
chr1	453633	460480	RP4-669L17.2	ENSG00000236601.1	-	0	0	0	0	0	0	0	0	0	0	0	0	0	0	0	0	0	0
chr1	459656	461954	RP5-857K21.15	ENSG00000236743.1	+	0	0	0	0	0	0	0	0	0	0	0	0	0	0	0	0	0	0
chr1	470971	471355	RP4-669L17.1	ENSG00000236679.2	+	0.179766	0.09574	0.079042	0.143667	0.145079	0.13582	0.220113	0.109471	0.149519	0.2008	0.143965	0.031624	0.064074	0.153994	0.203526	0.047214	0.173533	0.127268
chr1	521369	523833	RP5-857K21.1	ENSG00000231709.1	-	0	0	0	0	0	0	0	0	0.066308	0	0	0	0	0	0	0	0	0
chr1	523009	530148	RP5-857K21.2	ENSG00000235146.2	+	0	0	0	0	0	0	0	0	0	0	0	0	0	0	0	0	0	0
chr1	529833	532878	RP5-857K21.3	ENSG00000239664.2	-	0	0	0	0	0	0	0	0	0	0	0	0	0	0	0.024036	0	0	0
chr1	536816	659930	RP5-857K21.4	ENSG00000230021.3	-	0.370004	0.141621	0.25755	0.511388	0.340656	0.477717	0.704724	0.688374	0.333233	0.586157	0.545873	0.73494	0.558834	0.058206	0.05843	0.540146	0.241485	0.125048
chr1	562757	564390	RP5-857K21.5	ENSG00000223659.1	-	0	0	0	0	0	0	0	0	0	0	0	0	0	0	0	0	0	0
chr1	564442	564813	MTND1P23	ENSG00000225972.1	+	113.885	90.5147	104.085	125.26	114.857	158.733	162.725	136.227	200.857	154.802	161.137	154.319	150.322	128.279	156.621	136.853	122.02	120.513
chr1	565020	566063	MTND2P28	ENSG00000225630.1	+	728.82	645.811	801.472	738.198	727.977	734.382	969.545	920.17	931.773	989.88	1021.58	1020.8	803.162	820.933	817.296	679.68	690.059	604.283
chr1	566454	567996	hsa-mir-6723	ENSG00000237973.1	+	845.193	854.69	975	869.505	904.748	949.407	1601.22	1600.23	1626.27	1656.96	1722.31	1507.94	1595.2	1715.07	1684.49	1626.15	1842.94	1642.69
chr1	568137	568818	RP5-857K21.7	ENSG00000229344.1	+	39.8578	28.0349	43.6481	52.0977	43.5803	78.0179	60.6428	62.2325	92.2096	67.7217	79.3087	79.8373	47.4483	43.3021	49.5189	55.3258	53.4475	46.1684
chr1	568915	569121	MTATP8P1	ENSG00000240409.1	+	2.32526	1.80489	3.01351	2.71963	2.26214	4.87722	4.01925	3.4272	5.39142	5.46601	3.67196	5.20372	1.80115	2.86894	2.97738	2.47765	2.74017	3.54789
chr1	569076	569756	MTATP6P1	ENSG00000248527.1	+	1857.32	1736.61	1873.16	2052.29	2132.38	1826.1	3095.12	2995.92	3270.6	3078.57	3250.81	3125.17	2244.93	1981.05	2079.22	2015.5	2075.05	2071.98
chr1	569756	570302	RP5-857K21.11	ENSG00000198744.5	+	77.4924	63.7682	85.377	97.1557	84.4244	150.752	136.889	136.378	196.284	148.576	185.009	184.999	99.3801	105.494	111.676	107.43	110.18	102.591
chr1	610222	610645	WBP1LP6	ENSG00000268663.1	+	0	0	0	0	0	0	0	0	0	0	0	0	0	0	0	0	0	0
chr1	621059	622053	OR4F16	ENSG00000185097.2	-	0	0	0	0	0	0	0	0	0	0	0	0	0	0	0	0	0	0
chr1	657472	660283	CICP3	ENSG00000229376.3	+	0	0	0	0	0	0	0	0	0	0	0	0	0	0	0	0	0	0
chr1	661611	663527	RP11-206L10.1	ENSG00000224956.5	-	5.94321	4.43898	3.89687	7.36432	6.5104	6.74534	11.9465	7.56308	10.5602	8.25018	6.19624	10.8901	14.5633	6.74385	12.4183	28.0401	14.3397	23.4425
chr1	677193	685396	RP11-206L10.3	ENSG00000235373.1	-	1.41599	0.97812	0.993036	1.85156	1.2273	1.59783	2.70682	1.86875	2.35486	2.41043	1.61258	2.96523	1.95564	1.25798	1.6293	4.08826	2.50173	3.6837
chr1	693613	693716	RNU6-1199P	ENSG00000223181.1	-	0	0	0	0	0	0	0.188838	0	0	0.043142	0	0.061196	0	0.032554	0	0.227601	0.229195	0.043431
chr1	694412	700305	RP11-206L10.5	ENSG00000240618.1	-	6.0211	6.51497	4.82122	8.94361	6.07978	9.58783	15.5048	9.83331	14.678	14.4385	10.9248	19.2055	11.7903	7.05343	12.7691	25.4427	14.1605	25.8709
chr1	696291	697369	RP11-206L10.4	ENSG00000229905.1	+	0	0	0	0	0	0	0	0	0	0	0	0	0	0	0	0	0	0
chr1	700237	714006	RP11-206L10.2	ENSG00000228327.2	-	3.38226	2.49965	2.41851	5.01851	4.07267	3.63838	7.14732	5.41122	6.68359	5.8745	3.6044	7.45311	5.73381	3.7521	4.96765	8.90516	4.80644	7.41785
chr1	714150	745440	RP11-206L10.9	ENSG00000237491.4	+	3.93669	4.38972	3.63263	3.62983	3.65404	5.19218	3.52056	3.47598	3.85033	4.16735	3.03773	3.61181	4.51118	4.38861	3.88357	4.4793	4.34824	3.65318
chr1	736259	745541	RP11-206L10.8	ENSG00000230092.3	-	0.078638	0.129825	0.114185	0	0.532364	0.316227	1.09613	0.486668	0.545603	0.708707	0.52175	0.506772	0.850065	0.324434	0.913364	0.613079	0.484515	0
chr1	738532	739137	AL669831.1	ENSG00000269831.1	-	0	0	0	0	0	0	0.51153	0.267907	0	0.223523	0	0	0.755918	0	0.049199	0	0	0
chr1	745489	753092	RP11-206L10.10	ENSG00000240453.1	-	0.279269	0.213142	0.236228	0	0.468464	0	0.404335	0.309668	0	0.36992	0.319512	0.230606	0.381574	0.384476	0.3908	1.46987	0.851119	0.703992
chr1	752751	755214	FAM87B	ENSG00000177757.1	+	0	0	0	0.315757	0	0.025137	0	0	0.028724	0	0	0	0.063085	0	0	0	0	0
chr1	761586	762902	LINC00115	ENSG00000225880.4	-	1.84713	1.30829	1.85685	1.6132	1.72398	1.50493	1.21698	1.18427	1.51245	0.55099	0.720342	1.34259	0.986995	0.925315	0.906341	1.21568	1.08044	1.44159
chr1	762988	794826	RP11-206L10.11	ENSG00000228794.4	+	4.67716	3.83724	4.69869	4.93069	6.21144	5.76798	4.62674	6.04395	6.16289	3.99274	5.67201	4.79141	8.24545	8.85687	11.9175	12.3398	9.64132	11.6503
chr1	803451	812283	FAM41C	ENSG00000230368.2	-	0.065268	0.030079	0	0.022364	0	0.096498	0.116666	0.094027	0.048335	0.031588	0.038492	0.042448	0.043287	0.117152	0.229531	0.101773	0	0.116108
chr1	808672	809729	TUBB8P11	ENSG00000234711.1	+	0	0	0	0	0	0	0	0	0	0	0	0	0.020616	0	0	0	0	0.028225
chr1	818043	819983	AL645608.2	ENSG00000269308.1	+	0	0	0	0	0	0	0	0	0	0	0	0	0	0	0	0	0	0
chr1	840214	851356	RP11-54O7.16	ENSG00000272438.1	+	0.650479	0.555065	0	0.804508	1.16529	0.263972	0.59011	1.01375	0.590626	0.882147	0.359764	0.59641	3.13401	2.89851	1.94433	2.02463	0.901394	1.26318
chr1	846815	850328	RP11-54O7.1	ENSG00000230699.2	+	0.572043	0.471944	0.52502	0.678717	0.507008	0.793131	0.71664	0.636045	0.465524	0.570918	0.42533	0.524772	3.14483	2.77559	3.2525	1.43594	1.25662	1.62663
chr1	849551	850351	RP11-54O7.2	ENSG00000241180.1	+	0	0	0	0.07734	0	0	0	0	0	0	0	0	0	0.383593	0	0.285356	0	0.212956
chr1	852245	856396	RP11-54O7.3	ENSG00000223764.2	-	0.010935	0	0.010311	0.034735	0.063649	0.008519	0.33886	0.379121	0.377126	0.334263	0.184233	0.260538	10.0109	9.0921	11.6599	2.91165	1.83422	2.41567
chr1	860260	879955	SAMD11	ENSG00000187634.6	+	0.514074	0.223732	0.11771	0.171879	0.320534	0.056904	5.226	4.50605	4.07952	2.53699	3.38079	2.93904	93.0933	80.0486	96.2966	26.1835	27.7696	32.4275
chr1	861264	866445	AL645608.1	ENSG00000268179.1	-	0	0	0	0	0	0	0	0	0	0	0	0	0	0	0	0	0	0
chr1	879584	894689	NOC2L	ENSG00000188976.6	-	100.821	92.3736	89.4231	98.4818	95.5261	94.1749	75.6593	72.7352	71.8127	66.3512	67.7439	64.905	73.3253	61.6536	67.9809	74.7161	70.5255	66.8148
chr1	895967	901095	KLHL17	ENSG00000187961.9	+	23.8114	22.0226	20.3324	22.4832	22.6137	26.5013	13.868	12.7294	13.7602	12.3878	9.49064	10.1417	18.8557	14.9702	18.5007	25.875	17.8292	23.3353
chr1	901877	911245	PLEKHN1	ENSG00000187583.6	+	1.58317	1.13713	1.33174	1.12378	1.13133	1.81316	0.760914	0.910937	0.985966	1.1261	0.760598	0.74435	1.50305	1.07955	1.25549	1.68032	1.54454	1.34829
chr1	910579	917497	C1orf170	ENSG00000187642.5	-	0	0	0	0	0	0	0	0	0	0	0	0	0	0	0	0	0	0
chr1	931346	933431	RP11-54O7.17	ENSG00000272512.1	-	0.067055	0.065764	0	0.183991	0.076352	0.020036	0.023608	0	0	0.046418	0	0	0	0	0.035032	0.08618	0	0.088056
chr1	934342	935552	HES4	ENSG00000188290.6	-	2.79971	2.30706	1.37309	1.87128	1.65647	0.976647	0.945168	0.835698	1.01912	0.365218	0.670617	0.636499	1.73996	2.76979	1.86565	4.08069	3.88375	4.6256
chr1	943456	943609	RP11-54O7.10	ENSG00000231702.2	-	6.04557	7.78384	5.51579	5.70841	4.55561	12.6827	3.03231	6.51144	7.64993	7.34751	5.55848	9.31051	4.593	5.39119	3.24573	5.74638	7.14029	7.06586
chr1	947377	948573	RP11-54O7.11	ENSG00000224969.1	-	0	0.20241	0	0	0	0	0	0.114601	0	0	0	0	0	0	0	0	0.114214	0
chr1	948803	949920	ISG15	ENSG00000187608.5	+	12.516	12.3468	13.5732	10.201	10.6509	11.816	11.3975	11.3265	10.2647	10.1479	9.17989	7.77244	18.9386	17.2183	17.1524	16.1969	17.9317	16.7587
chr1	955503	991496	AGRN	ENSG00000188157.9	+	70.1925	59.2514	51.7501	70.8732	67.8216	64.7605	49.3316	37.2968	41.3335	36.7937	30.3214	35.4649	109.138	75.3778	99.2883	89.6062	67.1717	77.5923
chr1	990413	991496	RP11-54O7.14	ENSG00000242590.1	+	0.018481	0.009267	0.001429	0.009245	0.001369	0.036081	0.020017	0.001002	0.019712	0.000988	0	0.026574	0.052005	0.015437	0.011673	0.010309	0.037442	0.00203
chr1	995114	1004735	RP11-465B22.3	ENSG00000217801.5	+	3.26199	2.46562	3.72995	2.35762	3.17661	2.28966	2.84829	3.06271	3.26941	2.00013	1.83948	1.65481	0.977586	0.556228	1.2418	1.20805	1.65062	1.22076
chr1	997588	998668	RP11-54O7.18	ENSG00000273443.1	-	0	0	0	0	0	0	0	0	0	0	0	0	0	0	0	0	0	0
chr1	1006346	1009687	RNF223	ENSG00000237330.2	-	0	0	0	0	0	0	0.054795	0	0	0	0	0	0	0	0	0	0	0
chr1	1017198	1051741	C1orf159	ENSG00000131591.13	-	8.06877	8.28937	6.86629	10.4151	8.55987	6.17224	12.7643	10.0988	9.50949	8.62701	6.70056	7.65903	12.8107	10.3348	11.5627	13.3428	8.61103	10.1461
chr1	1072397	1079436	RP11-465B22.5	ENSG00000223823.1	+	0.209948	0.10846	0.121762	0.227836	0.061575	0	0	0	0	0	0	0	0	0	0	0	0	0
chr1	1102484	1102578	MIR200B	ENSG00000207730.1	+	0.262435	0.901425	0.166294	0	0	0.058352	0.463069	0	0.393556	0.215172	0	0.037525	2.14224	1.12689	2.20768	0.785652	1.19545	1.54807
chr1	1103243	1103332	MIR200A	ENSG00000207607.1	+	0	0.163203	0	0	0	0	0.500433	0	0	0.282114	0	0	0.706137	0.593931	1.52242	0.948196	0.682462	0.836129
chr1	1104385	1104467	MIR429	ENSG00000198976.1	+	0.414204	0.360612	0	0	0	1.09723	1.71941	1.30308	1.56315	0.528856	0.992859	0.608468	3.18258	2.64603	5.77127	3.72589	2.99473	3.51364
chr1	1104737	1105723	RP11-465B22.8	ENSG00000272141.1	+	1.29276	0.767954	1.43809	1.69741	1.79795	1.71194	2.68328	1.66141	2.47466	1.98909	1.48126	1.53364	3.30843	2.89079	3.43873	4.56512	2.72884	3.36181
chr1	1108436	1114935	TTLL10-AS1	ENSG00000205231.1	-	0.163296	0	0.129455	0	0	0	0.039863	0	0.014225	0.036248	0	0.037757	0.073723	0	0	0	0.023062	0
chr1	1109264	1133315	TTLL10	ENSG00000162571.9	+	0.368741	1.43855	1.14823	1.19	1.05482	0.882583	0.229482	0.178014	0.358618	0.136289	0.317948	0.72842	0.173169	0.148816	0.239855	0.181451	0.114323	0.313956
chr1	1138888	1142071	TNFRSF18	ENSG00000186891.9	-	1.01565	0.855388	1.6394	0.952157	1.64722	1.26755	1.89927	1.64216	1.39844	1.52087	1.14898	1.30469	0.628121	0.758156	1.21837	0.889417	0.721482	0.34835
chr1	1146706	1149518	TNFRSF4	ENSG00000186827.6	-	0	0.064941	0	0	0	0.202889	0	0	0	0	0	0	0	0	0	0	0.092549	0
chr1	1152288	1167411	SDF4	ENSG00000078808.12	-	65.8375	66.2537	51.9455	54.891	57.284	54.4824	68.4755	63.6576	62.8705	56.367	57.5061	54.7862	113.129	96.567	105.583	118.961	75.263	80.2068
chr1	1167629	1170421	B3GALT6	ENSG00000176022.3	+	9.28377	7.92833	6.80542	8.12018	8.01202	8.48349	17.5949	16.8987	15.5913	15.4134	15.0453	15.0247	23.1441	21.1593	20.7029	18.7001	16.6329	14.6313
chr1	1177826	1182102	FAM132A	ENSG00000184163.3	-	2.351	2.34037	1.7112	2.24031	1.95791	2.13558	1.52079	1.51289	1.23609	0.923904	1.339	1.10899	2.66129	2.14947	1.77567	2.39619	1.51147	1.56558
chr1	1185157	1186714	RP5-902P8.12	ENSG00000260179.1	-	0.382535	0.187486	0.200403	0.320215	0.290589	0.314632	0.173281	0.118711	0.400433	0.08535	0.06565	0.094576	0.317765	0	0.083372	0.525416	0.109457	0.379369
chr1	1189289	1209265	UBE2J2	ENSG00000160087.16	-	48.2157	43.5575	41.6975	54.3992	51.7089	51.3973	57.9955	53.8403	56.6746	47.9136	50.6648	55.4642	68.7721	53.8067	61.573	66.092	52.3511	60.4519
chr1	1210603	1215800	RP5-902P8.10	ENSG00000230415.1	+	1.71288	1.32072	1.58498	1.61328	0.774836	2.62382	3.12658	0.628274	2.22197	1.74343	0.836233	1.35608	3.83052	1.8653	2.39236	2.59116	1.13432	2.72561
chr1	1215816	1227409	SCNN1D	ENSG00000162572.15	+	1.37425	1.61378	0.961189	1.44093	1.6869	1.42929	1.92152	1.25075	1.1689	1.11964	0.800132	1.34807	2.77621	1.06831	1.70679	2.71694	1.55015	1.91241
chr1	1227756	1244989	ACAP3	ENSG00000131584.14	-	10.4194	8.37876	7.30818	10.991	11.16	10.3126	9.184	5.76798	6.3484	7.00947	5.79759	6.16225	7.95651	6.01839	6.8465	10.0309	8.01567	9.95369
chr1	1243947	1247057	PUSL1	ENSG00000169972.7	+	29.2695	26.4454	21.8906	23.8545	25.7886	24.3581	12.9382	15.182	13.7485	11.3832	11.0664	10.1974	16.8485	15.225	17.7245	15.7605	15.8821	14.8577
chr1	1246965	1260071	CPSF3L	ENSG00000127054.14	-	67.6113	63.1628	55.9589	67.9153	77.3012	69.241	71.6039	49.5354	50.5912	45.3668	42.49	43.6518	70.3404	60.8084	67.7538	77.731	62.4782	66.4223
chr1	1252961	1254069	RP5-890O3.9	ENSG00000240731.1	-	6.63487	4.22169	5.17396	7.08294	8.27812	6.74011	4.41932	2.27352	3.73037	3.55164	2.76342	5.36691	4.50226	2.93337	3.421	5.80509	4.20763	6.74097
chr1	1260136	1264277	GLTPD1	ENSG00000224051.2	+	5.15808	4.97664	3.66253	4.46409	4.74817	5.4723	8.81027	7.4805	8.0447	6.2201	5.83709	6.20176	10.5971	8.26497	11.0109	11.1734	9.1279	10.3589
chr1	1266694	1270686	TAS1R3	ENSG00000169962.4	+	0.01965	0	0	0	0	0	0.074076	0	0	0.024949	0	0.044162	0.035338	0.029	0	0.049254	0	0
chr1	1270656	1284730	DVL1	ENSG00000107404.13	-	37.2165	34.806	32.2354	35.013	33.3893	34.873	25.8741	24.2352	22.6871	20.2475	20.3014	19.0393	32.4595	27.3694	29.4005	33.1664	34.4135	34.5016
chr1	1288069	1297157	MXRA8	ENSG00000162576.12	-	4.88304	3.40553	4.54432	5.15389	3.41444	4.96941	17.3538	16.5032	15.2174	12.2979	12.4804	12.0215	31.9568	28.8928	32.0929	25.1268	20.0861	19.7704
chr1	1309110	1310875	AURKAIP1	ENSG00000175756.9	-	89.7789	101.286	94.4335	92.8514	96.9179	98.5316	93.4564	97.388	90.3736	83.6523	91.6169	72.2317	115.184	103.227	95.826	101.183	105.565	86.9583
chr1	1314046	1314412	RP5-890O3.3	ENSG00000223663.2	+	0.221675	0	0.064569	0	0	0	0	0	0.064622	0	0	0	0.214807	0	0.371355	0.24419	0	0
chr1	1321091	1334708	CCNL2	ENSG00000221978.7	-	85.8967	80.2314	64.6515	102.644	94.127	89.5249	104.06	64.0555	100.765	79.061	80.1402	101.747	145.723	111.66	147.539	169.306	136.588	142.736
chr1	1334902	1337426	RP4-758J18.2	ENSG00000224870.3	+	13.2994	13.3383	10.9686	14.8789	12.4728	12.3707	13.3664	13.3284	13.5881	12.447	11.9949	11.6113	19.7064	16.7362	16.3402	18.0045	16.2726	14.7006
chr1	1337288	1342693	MRPL20	ENSG00000242485.1	-	109.423	114.46	116.478	124.61	110.595	117.635	119.227	119.985	118.4	119.308	119.315	113.649	128.679	149.656	139.132	128.662	131.78	124.496
chr1	1340841	1341132	RN7SL657P	ENSG00000264293.1	-	0.0123	0.013439	0.019415	0.01164	0.024605	0.019711	0.015701	0.010391	0.031255	0.01787	0.022483	0.009129	0.044678	0.014744	0.017305	0.150288	0.012579	0.009596
chr1	1344476	1345998	RP4-758J18.13	ENSG00000272455.1	+	9.21557	10.193	8.84072	7.16122	7.95876	8.30917	5.35989	3.93559	6.80431	4.79532	5.03253	7.01164	9.8315	7.48939	9.92739	10.486	9.57268	12.5158
chr1	1353800	1357149	ANKRD65	ENSG00000235098.4	-	1.53381	1.70339	1.35749	1.31597	1.12206	1.44212	1.49159	1.51269	1.58462	1.17662	0.798753	1.58351	2.50044	2.01593	2.44324	1.7186	1.76565	1.36982
chr1	1355625	1358071	RP4-758J18.7	ENSG00000225905.1	+	0.455662	0	0.709605	0.218713	0.533349	0.60524	0.391094	0.449039	0.311019	0.693132	0.875224	0.494944	0.506128	0.509915	0.15813	0.859204	0.384822	0.454837
chr1	1361508	1363167	TMEM88B	ENSG00000205116.3	+	0.105614	0	0.26312	0.210712	1.22656	0.231244	0	0	0.125896	0.233103	0	0	0.31011	0	0	0	0	0
chr1	1365919	1369953	RP4-758J18.10	ENSG00000225285.1	-	3.53644	5.21498	3.74482	3.18026	3.0682	2.84571	4.01021	4.97441	3.75899	3.03861	3.5661	2.9984	2.83821	2.37783	2.17476	3.4935	2.02116	3.21147
chr1	1370241	1378262	VWA1	ENSG00000179403.10	+	9.70669	8.52213	7.47021	8.96585	8.48681	7.74453	6.90576	5.92523	5.76417	5.7052	5.25103	4.88474	8.35351	5.62393	5.97913	7.77554	8.68734	7.40921
chr1	1385069	1405538	ATAD3C	ENSG00000215915.5	+	1.42573	1.06596	1.21591	1.38961	1.59069	1.51801	0.878315	0.741653	0.944778	0.704042	0.496206	0.776323	0.636559	0.644002	0.704399	0.77657	0.720061	0.877327
chr1	1407143	1433228	ATAD3B	ENSG00000160072.15	+	23.6773	23.0637	20.7942	28.1279	22.3531	23.7941	17.2987	12.0368	14.5438	12.7033	11.2682	15.1122	17.6315	15.7905	14.0623	19.7065	14.8634	15.1071
chr1	1447531	1470067	ATAD3A	ENSG00000197785.9	+	35.7745	35.9506	33.5509	39.8102	36.9832	39.2968	28.9013	24.8824	27.1064	24.83	23.0119	24.0139	32.2875	27.9429	28.5035	31.4145	26.6256	26.4759
chr1	1470554	1475833	TMEM240	ENSG00000205090.4	-	4.02743	1.58933	4.26072	3.79657	2.80442	3.14352	4.94283	5.59929	5.53528	5.11304	4.33371	5.19731	8.38425	6.07537	7.36878	7.32586	9.72566	5.80339
chr1	1477053	1510249	SSU72	ENSG00000160075.10	-	149.049	152.753	147.735	147.081	149.773	151.852	141.423	139.938	140.143	135.689	142.473	139.367	149.385	143.89	150.566	142.776	142.484	137.239
chr1	1497726	1499904	AL645728.2	ENSG00000215791.2	-	0.119274	0.026911	0.013705	0.017265	0.029792	0.022684	0.099576	0.043592	0.180604	0.2294	0.025581	0.024491	0.014689	0.165217	0.103201	0.181341	0.075079	0.194767
chr1	1510355	1511373	AL645728.1	ENSG00000215014.3	+	0.640248	0.768858	1.04346	1.47176	0.670094	0.320186	0.822054	1.31071	1.32525	0.708652	0.914077	0.74575	1.05691	1.22071	2.20233	1.315	0.609843	1.07949
chr1	1515136	1515379	AL645728.3	ENSG00000236684.1	+	0	0	0.066598	0	0	0	0	0	0	0.256619	0	0	0.014912	0	0	0	0	0.202203
chr1	1533392	1535476	C1orf233	ENSG00000228594.1	-	17.6622	18.2973	17.0974	14.7425	15.3901	16.1229	10.1647	8.49763	9.94146	9.03237	7.88583	7.49419	14.1411	9.26479	11.4362	12.253	10.2517	8.96552
chr1	1549138	1551175	RP11-345P4.9	ENSG00000272106.1	-	4.67979	3.5993	3.53372	3.62494	4.05307	4.17213	5.27609	4.45413	4.13262	4.33511	4.05279	4.78271	5.9375	4.20391	4.99185	5.74358	4.6522	5.57935
chr1	1550795	1565990	MIB2	ENSG00000197530.8	+	12.7475	11.6325	10.8175	13.5456	9.67715	12.0876	12.7165	9.63416	9.91273	10.1896	8.3847	8.74276	15.7494	13.507	15.4939	16.0981	13.5221	14.4396
chr1	1567474	1570639	MMP23B	ENSG00000189409.8	+	3.31233	3.14737	2.98422	3.06215	2.51791	3.02454	4.70652	4.56562	4.5976	3.39546	3.21777	3.70025	3.90944	3.32064	5.0041	3.31043	2.812	1.71714
chr1	1570603	1590473	CDK11B	ENSG00000248333.3	-	58.039	53.3772	51.3646	56.8153	56.229	57.7232	57.4015	55.6907	57.4353	59.6259	55.2677	62.8815	67.7738	62.8889	66.2236	63.2686	62.6009	61.9463
chr1	1590786	1594063	RP11-345P4.10	ENSG00000272004.1	+	0.072967	0	0.08192	0	0.147586	0.009506	0	0.039057	0.250202	0.170882	0.012711	0.096706	0.098272	0.094018	0	0.024106	0.079454	0.153528
chr1	1592939	1624167	SLC35E2B	ENSG00000189339.7	-	25.4049	23.5055	21.4994	27.4046	24.9226	24.3603	34.0548	28.6627	31.7918	28.7166	25.8268	27.6797	33.3161	27.4039	30.158	37.7881	31.067	37.2643
chr1	1603429	1604850	RP11-345P4.7	ENSG00000269737.1	+	0	0	0	0	0	0.014347	0	0.045005	0.009811	0	0	0.074861	0.048573	0.028232	0	0.003918	0	0
chr1	1604714	1605836	RP11-345P4.6	ENSG00000269227.1	+	0	0.003588	0	0.044173	0	0	0	0	0	0	0	0	0	0.030093	0	0	0	0
chr1	1631369	1633249	MMP23A	ENSG00000215914.3	+	3.02515	2.75219	2.41957	2.28941	1.99525	2.43459	3.76307	3.84417	3.24514	2.88933	3.02222	2.91799	3.84853	3.02489	4.58783	2.78771	2.63237	1.50472
chr1	1634169	1655766	CDK11A	ENSG00000008128.18	-	31.6577	27.0888	28.6244	35.4227	29.5089	32.4197	31.9828	30.7439	34.3904	35.3872	34.9036	34.2069	39.0411	33.9013	38.2696	38.4985	35.8453	32.31
chr1	1634175	1669127	RP1-283E3.8	ENSG00000268575.1	-	4.20611	4.98846	4.61596	4.14114	6.22181	4.76432	5.4894	3.50574	3.78879	3.05498	2.63766	5.38298	4.65524	4.61427	4.85081	6.80017	4.22174	7.85367
chr1	1655951	1668690	RP1-283E3.4	ENSG00000227775.3	+	0	0.02651	0.328992	0.098605	0.095941	0.087675	0.286384	0.325399	0.372188	0	0.303332	0.043433	0.334462	0.23858	0.153917	0.619137	0	0.328408
chr1	1656277	1677431	SLC35E2	ENSG00000215790.2	-	9.98276	9.72151	7.62633	10.0865	9.56974	10.114	12.4074	9.93487	10.3256	11.6149	8.62455	9.60456	14.4861	10.3126	10.0032	14.5923	11.2542	13.1143
chr1	1682671	1711896	NADK	ENSG00000008130.11	-	47.0928	43.472	42.8649	45.0778	45.9257	44.9539	35.7539	30.4185	34.0282	32.2301	29.846	32.7555	40.9542	33.2774	38.7829	39.9125	38.9137	40.0558
chr1	1716729	1822495	GNB1	ENSG00000078369.13	-	234.95	231.828	227.412	249.727	240.674	254.574	314.637	299.549	310.982	304.159	302.347	310.008	291.447	266.349	271.617	373.815	335.365	338.692
chr1	1822910	1824097	RP1-140A9.1	ENSG00000231050.1	+	0.110362	0.24043	0	0	0	0.118875	0.297983	0.062631	0.258073	0.31017	0.082932	0.241333	0.354479	0.262442	0	0.164171	0.144035	0.124755
chr1	1846266	1848735	CALML6	ENSG00000169885.5	+	0.899553	1.22908	0.938878	0.593198	0.516267	1.00112	1.01068	1.09599	0.830667	0.599128	0.458332	0.537851	1.15862	0.314146	0.366801	1.3351	0.580458	1.29162
chr1	1849029	1850712	TMEM52	ENSG00000178821.8	-	10.2101	9.6203	11.037	10.4041	9.90925	9.59371	6.01967	4.78705	5.86429	4.52036	3.8832	4.04978	5.61813	4.43823	6.15096	4.53591	4.34808	4.8908
chr1	1853396	1935276	C1orf222	ENSG00000142609.13	-	0.052899	0	0.030924	0.138647	0	0.097893	0.011119	0.087074	0	0.009091	0.088051	0.184195	0.168043	0.099945	0.090919	0	0	0
chr1	1944652	1946969	RP11-547D24.1	ENSG00000233542.1	-	0.389513	0.140304	0.14755	0.180002	0.370745	0.291562	0.075447	0.065176	0	0.064089	0.116226	0.095782	0	0	0	0.110484	0.054315	0
chr1	1950780	1962192	GABRD	ENSG00000187730.6	+	0.901449	1.08684	0.642992	1.19035	0.643587	0.511554	0.137703	0.088095	0	0.15702	0.070824	0.065948	0.110569	0	0	0	0	0.0599
chr1	1980642	1981509	RP11-547D24.3	ENSG00000226969.1	-	0	0	0	0	0	0	0	0	0.266807	0	0	0.071153	0.177623	0	0.373743	0.484	0	0
chr1	1981909	2116834	PRKCZ	ENSG00000067606.11	+	34.6211	29.4342	28.9115	32.12	31.9023	32.9001	34.8605	34.6145	32.5065	31.9986	31.4191	29.8296	39.9744	36.7778	36.9802	43.9545	39.5268	41.8095
chr1	2072523	2076718	RP5-892K4.1	ENSG00000271806.1	-	0	0	0	0	0	0	0.012868	0	0	0	0	0	0	0	0	0	0.000607	0
chr1	2113233	2115828	RP11-181G12.2	ENSG00000182873.4	-	1.44703	1.38164	0.839373	2.69673	2.65941	1.57924	1.70175	2.5056	1.48389	1.24105	1.96522	1.92018	1.34095	1.42382	1.29548	1.57006	1.80123	1.31828
chr1	2115903	2144159	C1orf86	ENSG00000162585.12	-	45.6655	50.4987	47.6764	50.0022	51.0672	49.0181	63.0162	54.2774	51.2986	49.2781	40.6406	43.2129	87.4317	70.7843	62.7476	70.3724	69.9138	66.3485
chr1	2121237	2123179	AL590822.2	ENSG00000269554.1	+	0.008442	0.01078	0	0.003157	0.010274	0.023629	0.015712	0.028192	0.022199	0.002082	0.023346	0.011854	0.007999	0.012831	0.020452	0.008132	0.007996	0.0162
chr1	2143360	2145620	AL590822.1	ENSG00000203301.2	-	0.025358	0.029938	0.114452	0.118759	0.038146	0.066608	0.151947	0.173045	0.184028	0.152448	0.137284	0.110371	0.095722	0.033451	0.049213	0.092561	0.138347	0.061451
chr1	2143610	2144013	RP11-181G12.5	ENSG00000243558.1	-	0	0	0	0	0	0	0	0.023837	0	0.022059	0	0	0	0.01485	0	0	0	0
chr1	2143962	2152177	RP11-181G12.4	ENSG00000234396.3	+	0.000674	0	0	0.666787	0	0.051484	0	0.394983	0.049401	0.02445	0.199158	0	0.027552	0.000751	0.049004	0.10986	0	0.20209
chr1	2160134	2241558	SKI	ENSG00000157933.9	+	50.1626	43.7576	39.4848	51.114	49.1096	52.6542	37.1206	29.3621	33.8671	29.404	25.4777	36.0326	49.5505	35.0498	47.0443	51.319	40.4321	49.5234
chr1	2252692	2323146	MORN1	ENSG00000116151.9	-	4.09178	3.06259	3.31396	4.03965	3.82601	4.31355	9.08463	7.15451	9.34957	7.48831	6.00867	7.07869	11.652	8.82259	11.3984	8.85766	6.69303	7.41389
chr1	2257640	2258132	RP4-713A8.1	ENSG00000272161.1	-	0.082009	0	0.087677	0.136351	0.365544	0.452447	0.071173	0.037213	0.329384	0.260563	0.119958	0.036161	0.044282	0.059605	0.16898	0.358135	0.151539	0.070933
chr1	2258581	2259042	AL589739.1	ENSG00000269753.1	+	0	0.072017	0	0	0	0	0.023805	0	0.239155	0	0	0.081027	0	0	0	0	0.059142	0
chr1	2281853	2284259	RP4-740C4.6	ENSG00000269896.1	-	0.399589	0.115746	0.217014	0.507835	0.586711	0.62205	2.63007	3.14366	2.69503	2.21362	1.96805	2.62351	2.96037	1.99481	3.09271	1.93174	1.21622	1.36198
chr1	2283083	2283296	RP4-740C4.5	ENSG00000238240.2	-	0.018611	0	0.016753	0.000797	0.020641	0.015914	0.042942	0.300057	0.018851	0.099116	0.108102	0.090057	0.050501	0.011994	0.026311	0.102523	0.054766	0.006559
chr1	2294500	2295067	RP4-740C4.7	ENSG00000272420.1	-	0.254132	0.528935	0.166493	0.773919	0.25712	1.11863	1.02345	1.50716	1.54194	0.828109	1.47345	1.17052	1.13297	0.598227	1.49433	0.543981	0.894417	1.41879
chr1	2306292	2306792	RP4-740C4.9	ENSG00000271921.1	-	0.052938	0.062508	0.123941	0.146979	0.204054	0.308758	0.337118	0.197143	0.302404	0.170076	0.087564	0.620242	1.77785	0.619577	1.013	0.486441	0.45807	0.951657
chr1	2309056	2309799	RP4-740C4.8	ENSG00000271847.1	-	0.132648	0.220145	0.117965	0.421225	0	0.183432	0.250854	0.367581	0.080526	0.057553	0.019931	0.29591	0.419727	0.342456	0.35358	0.226099	0.059838	0.247359
chr1	2316811	2319922	AL513477.1	ENSG00000178642.5	+	0	0	0	0	0.015934	0	0	0	0.012828	0	0	0	0	0	0	0	0	0.01122
chr1	2323267	2336883	RER1	ENSG00000157916.14	+	47.7266	44.5997	49.1127	53.2623	48.6607	56.3506	65.8379	60.6897	63.1404	54.1459	54.2375	61.6495	66.401	69.5502	66.0959	73.7451	68.4966	73.6406
chr1	2336236	2345236	PEX10	ENSG00000157911.5	-	15.3151	15.0962	14.085	18.0254	17.2048	13.2661	22.8899	22.1849	20.2255	21.6254	18.4474	19.2234	27.742	27.2908	25.8451	23.8097	24.0995	21.4581
chr1	2357419	2436969	PLCH2	ENSG00000149527.13	+	0.168668	0.085894	0.109588	0.16088	0.061875	0	0	0	0	0	0.006939	0	0	0	0	0.008291	0.019238	0
chr1	2423739	2424697	RP3-395M20.2	ENSG00000224387.1	-	0	0	0	0	0	0	0	0	0	0	0	0	0	0	0	0	0	0
chr1	2424876	2425918	RP3-395M20.3	ENSG00000229393.1	-	0	0	0	0	0	0	0	0	0	0	0	0	0	0	0	0	0	0.092941
chr1	2439972	2458039	PANK4	ENSG00000157881.9	-	18.676	19.6408	18.4932	20.6583	20.1026	19.5544	14.2315	14.1466	14.5217	13.1832	12.4919	13.5067	19.6989	19.9292	19.6143	23.5411	19.4474	24.1589
chr1	2460184	2461684	HES5	ENSG00000197921.5	-	0	0	0.119116	0	0.084186	0	0	0	0	0	0	0	0	0.107431	0	0.092791	0	0.077939
chr1	2477904	2478899	RP3-395M20.12	ENSG00000272449.1	+	1.99909	2.25271	1.45396	2.2342	1.30557	1.41448	1.88215	2.1328	1.14547	1.49497	0.801831	1.06522	1.54234	0.907538	0.902449	1.29004	0.787982	0.260508
chr1	2481359	2488470	RP3-395M20.8	ENSG00000238164.2	-	0	0	0	0	0	0	0	0	0	0	0	0	0	0	0	0	0	0
chr1	2487078	2496821	TNFRSF14	ENSG00000157873.13	+	0.25945	0	0.069577	0.027991	0.020335	0.092302	0.817689	0.47034	0.40095	0.329391	0.279818	0.318715	0.379721	0.251811	0.836107	0.183062	0.302505	0.037185
chr1	2497849	2501327	RP3-395M20.7	ENSG00000225931.3	+	0	0	0	0	0	0	0	0	0	0	0.074376	0	0	0	0	0	0	0
chr1	2512999	2515972	RP3-395M20.9	ENSG00000228037.1	+	0	0	0	0	0	0	0	0	0	0	0	0	0	0	0	0	0	0
chr1	2517930	2522908	FAM213B	ENSG00000157870.10	+	26.3461	25.5678	23.0501	28.9399	29.0891	26.8418	34.0133	31.7494	32.2678	27.4609	25.6605	26.6803	29.6651	26.1823	26.5945	30.6539	26.9818	25.0306
chr1	2522078	2564481	MMEL1	ENSG00000142606.11	-	1.71091	0.772249	0.981951	0.773689	1.66348	0.830649	0.923882	0.31447	0.223465	0.26709	0.282284	0.585407	0.156214	0.104557	0.339642	0.250809	0.044852	0.173911
chr1	2564007	2568059	RP13-436F16.1	ENSG00000237058.1	+	0.144965	0.665598	0.379926	0	0.093789	0.085927	0	0	0	0	0	0	0	0	0	0	0.416302	0
chr1	2567415	2718286	TTC34	ENSG00000215912.7	-	0.208046	0.083222	0.071463	0.08576	0.03842	0.159219	0.831184	0.654238	0.963161	0.657836	0.387721	0.662919	1.21456	0.76646	1.29663	0.966466	0.600205	0.773662
chr1	2728415	2729257	RP11-740P5.2	ENSG00000233234.1	-	0	0	0	0	0	0	0	0	0	0	0	0	0	0	0	0	0	0
chr1	2730997	2731563	RP11-740P5.3	ENSG00000231630.1	-	0	0	0	0	0	0	0	0	0	0	0	0	0	0	0	0	0	0
chr1	2938046	2939465	ACTRT2	ENSG00000169717.5	+	0	0	0	0	0	0	0	0	0	0	0	0	0.120429	0.132761	0.151299	0	0	0.039579
chr1	2976179	2985001	LINC00982	ENSG00000177133.6	-	0.011308	0	0.037848	0.025818	0	0	0	0	0.046222	0	0	0	0.051639	0.023814	0.05943	0	0	0.01463
chr1	2978523	2978959	AL008733.1	ENSG00000256761.1	-	0	0	0	0	0	0	0	0	0	0	0	0	0	0	0	0.119984	0	0
chr1	2985732	3355185	PRDM16	ENSG00000142611.12	+	0.827766	0.128014	0.116015	0.480325	0.175727	0.158711	0.813823	0.52187	0.735571	0.652299	0.416575	0.60637	0.786885	0.687905	0.910947	0.826748	0.515641	0.912932
chr1	3049491	3050273	RP1-163G9.2	ENSG00000226286.1	-	0	0	0	0	0	0	0	0	0.074959	0	0	0.075166	0.847688	0.708621	0.891251	0.412397	0	0.150458
chr1	3223200	3226660	RP11-22L13.1	ENSG00000272235.1	-	0.009327	0	0.007037	0.01362	0	0	0	0	0.121731	0.001119	0	0	0	0.036174	0	0	0	0
chr1	3370990	3397677	ARHGEF16	ENSG00000130762.10	+	8.53729	9.55157	8.53185	10.448	9.5449	9.29362	30.4025	23.1935	23.1474	20.4775	19.2445	19.7395	35.6226	32.5127	37.2996	38.3473	33.7738	37.7166
chr1	3403810	3404191	RP11-168F9.2	ENSG00000272088.1	+	0.136026	0	0	0.146034	0.315951	0	0.352339	0.591944	0.447007	0.176869	0.18654	0.281004	0	0.09101	0.153996	0	0.296573	0.470802
chr1	3406484	3528059	MEGF6	ENSG00000162591.11	-	4.82413	4.34937	3.20524	4.69229	4.75451	4.58724	9.33991	6.75582	6.72694	6.51099	4.5461	5.10335	14.0438	11.6749	13.3889	15.523	12.0454	13.3886
chr1	3477259	3477354	MIR551A	ENSG00000207776.1	-	0	0	0	0	0	0	0	0	0	0	0	0	0	0	0	0	0	0
chr1	3539754	3541307	RP11-46F15.2	ENSG00000238260.1	-	0.638788	0.220106	0.278679	0.504039	0.400486	0.776214	0.328371	0.493867	0.341814	0.327601	0.621133	0.313315	0.538559	0.952849	0.691993	1.43091	1.34945	1.57823
chr1	3541566	3546691	TPRG1L	ENSG00000158109.10	+	16.0519	14.8371	13.9647	16.6684	14.3235	14.2767	38.5749	37.7511	38.0793	33.191	32.5827	34.1393	46.4534	44.8651	43.9794	52.5613	49.4977	51.7284
chr1	3547331	3569325	WRAP73	ENSG00000116213.11	-	18.9517	16.4596	16.5189	19.4466	19.0555	16.5903	16.221	13.8057	15.275	14.3771	12.3614	15.7249	22.9357	17.3445	15.5453	19.7809	19.6996	18.9812
chr1	3569084	3652765	TP73	ENSG00000078900.10	+	6.15877	5.81315	5.29849	4.02864	2.9729	3.1638	2.07095	2.3964	1.73703	1.47185	1.25896	2.1797	3.79384	1.45244	1.92367	2.08286	1.66012	2.60086
chr1	3575502	3585336	RP5-1092A11.5	ENSG00000227589.1	-	0.482058	0	0.233966	0	0	0	0	0	0	0	0	0	0	0	0	0	0	0
chr1	3628764	3630862	RP5-1092A11.2	ENSG00000235131.1	-	0	0	0	0	0	0	0	0	0	0	0	0	0	0	0	0	0	0
chr1	3652548	3663900	TP73-AS1	ENSG00000227372.6	-	25.8681	23.4573	20.9478	24.6378	24.3474	24.8185	18.4761	14.5578	16.4636	14.8328	14.7266	16.9247	25.2969	22.6503	26.0637	21.1125	22.0361	21.9625
chr1	3668962	3688209	CCDC27	ENSG00000162592.4	+	0.086701	0.137215	0.100257	0.124209	0.142336	0.06575	0	0	0	0	0	0	0	0	0	0	0	0.042043
chr1	3689352	3692546	SMIM1	ENSG00000235169.3	+	1.63628	2.41455	1.15706	0.947555	1.33468	1.48402	3.50014	1.7027	1.51159	1.87422	2.04061	1.65075	4.40942	4.65562	4.53738	3.42999	2.83115	3.67349
chr1	3696784	3713068	LRRC47	ENSG00000130764.5	-	84.0985	87.9626	79.0873	83.3549	85.0637	82.4672	48.3414	45.0288	49.0705	42.6979	44.6427	45.9373	58.7973	52.1965	59.4632	60.511	57.2414	58.6526
chr1	3699379	3699673	RN7SL574P	ENSG00000266075.1	+	0.233078	0	0.090741	0	0	0	0.079888	0.314561	0.314009	0.650621	0	0.11883	1.00233	0	0	0.311044	0.018843	0.168288
chr1	3701572	3702102	RP1-286D6.5	ENSG00000272153.1	+	0	0.46683	0	0.978697	0	1.21894	0.901473	0.662402	1.0448	0.949093	0.413142	0.830621	0.529057	0.367214	0	1.13467	0	0.834102
chr1	3728645	3773778	CEP104	ENSG00000116198.8	-	11.0305	10.7146	10.041	12.3281	10.3879	11.5073	12.7085	10.9828	11.1277	11.2064	11.1993	12.2245	11.4184	11.3032	11.3509	14.2383	12.0983	14.2428
chr1	3773845	3801993	DFFB	ENSG00000169598.11	+	6.06438	4.53766	3.59504	6.30114	5.38768	5.4589	3.87175	3.67551	4.06455	3.83932	3.05547	3.87338	3.50756	2.90781	3.38646	3.86129	3.19495	3.59879
chr1	3800628	3800697	AL691523.1	ENSG00000264428.1	+	0.000253	0.003371	0.00036	0.000784	0.000307	0.00024	0.000719	0.000781	0.000282	0.000347	0.000493	0.000332	0.000325	4.2e-05	0.001006	0.000435	0.000541	0.000747
chr1	3805689	3816857	C1orf174	ENSG00000198912.6	-	20.8938	19.2048	19.9133	23.2516	22.4509	22.7529	22.2007	21.319	21.6951	22.0303	22.8813	23.8397	27.0251	25.9653	24.093	25.9835	21.7888	23.5556
chr1	3816936	3833789	RP13-15E13.1	ENSG00000236423.1	+	0.137737	0.30811	0.416528	0.443858	0.221147	0.199306	0.252701	0.241731	0.178685	0.263961	0.134524	0.124825	0.095155	0.092612	0.592878	0.11688	0.078181	0.09544
chr1	4000673	4015322	RP13-614K11.1	ENSG00000233304.1	+	0	0	0	0	0	0	0	0	0	0	0	0	0	0	0	0	0	0
chr1	4007209	4009040	RP13-614K11.2	ENSG00000226374.1	-	0	0	0	0	0	0	0	0	0	0	0	0	0	0	0	0	0	0
chr1	4235588	4235959	RP11-374C13.1	ENSG00000229280.1	-	0	0	0	0	0	0	0	0	0	0	0	0	0	0	0	0	0	0
chr1	4472111	4484747	RP5-1166F10.1	ENSG00000235054.1	+	0	0	0	0	0	0	0	0	0	0	0	0	0	0	0	0	0	0
chr1	4611795	4612205	RP1-37J18.1	ENSG00000227169.2	-	0	0	0	0	0	0	0	0	0	0	0	0	0	0	0	0	0	0
chr1	4631608	4643481	RP1-37J18.2	ENSG00000232596.1	+	0	0	0	0	0	0	0	0	0	0	0	0	0	0	0	0	0	0
chr1	4714792	4852594	AJAP1	ENSG00000196581.6	+	1.94063	1.45282	1.64797	2.27995	2.13366	1.95428	0.811862	0.986598	0.747088	0.872535	0.615809	0.694869	6.33279	6.48188	7.36308	4.84383	4.85774	5.67977
chr1	5146519	5150959	RP11-542C10.1	ENSG00000231510.1	-	0.105208	0	0.124124	0	0.198228	0	0	0.142057	0	0	0	0	0	0.458583	0	0	0	0.182194
chr1	5553038	5554734	RP1-58B11.1	ENSG00000260972.1	+	0	0	0	0	0	0	0	0	0	0	0	0	0	0	0	0	0	0
chr1	5624131	5624203	MIR4417	ENSG00000264341.1	+	0	0	0	0	0	0	0	0	0	0	0	0	0	0	0	0	0	0
chr1	5647428	5728355	RP11-154H17.1	ENSG00000236948.1	-	0	0	0	0	0	0	0	0	0	0	0	0	0	0	0	0	0	0
chr1	5875931	5876019	AL356693.1	ENSG00000216045.2	-	0	0	0	0	0	0	0	0	0	0	0	0	0	0	0	0	0	0
chr1	5922732	5922801	MIR4689	ENSG00000264101.1	-	0	0	0	0	0	0	0	0.079234	0	0	0	0	0	0	0	0	0	0
chr1	5922871	6052533	NPHP4	ENSG00000131697.13	-	4.73396	3.9426	3.47675	5.14281	5.19692	5.21886	6.16394	5.93878	6.57189	4.72385	4.80116	5.71715	8.37221	5.6272	7.59408	6.61317	6.71244	7.2917
chr1	5953899	5953984	AL356261.1	ENSG00000266687.1	-	0	0	0	0	0	0	0	0	0	0	0	0	0	0	0	0	0	0
chr1	6051526	6161253	KCNAB2	ENSG00000069424.10	+	9.19778	10.341	6.16117	9.73602	8.57202	11.6568	5.86188	6.34142	9.01603	5.64377	4.23851	4.8807	12.944	11.7669	13.3877	11.8224	11.8312	11.5175
chr1	6100630	6101399	AL035406.1	ENSG00000268332.1	-	0	0	0	0	0	0	0	0	0	0	0	0	0	0	0	0	0	0
chr1	6161853	6240183	CHD5	ENSG00000116254.13	-	0.658148	0.391658	0.537976	0.595933	0.490263	0.435529	0.279255	0.188466	0.22287	0.13141	0.16232	0.163598	0.17125	0.091434	0.130153	0.28704	0.214947	0.336365
chr1	6241329	6269449	RPL22	ENSG00000116251.5	-	562.43	599.154	651.019	527.203	632.508	639.562	422.902	433.726	437.404	439.298	475.584	438.105	375.9	415.436	398.929	345.115	376.613	380.949
chr1	6264900	6265840	RP1-120G22.11	ENSG00000226944.1	-	0.973511	1.03511	1.11972	0.928306	2.19459	1.24265	0.174781	0.197084	0.203893	0.220078	0.35616	0.480213	0.157965	0	0.188207	0.271055	0.224972	0.297412
chr1	6265535	6281359	RNF207	ENSG00000158286.8	+	3.12224	3.19657	1.88873	2.92376	2.04826	2.37876	1.31468	1.04503	0.857068	1.0935	1.17672	1.81446	0.262051	0.454299	0.839645	0.85609	0.388119	0.326822
chr1	6281253	6296032	ICMT	ENSG00000116237.11	-	95.1332	94.8639	94.06	104.7	104.554	102.252	75.7104	71.7049	75.2896	68.0552	71.6105	65.2081	90.9059	89.2521	85.9718	83.7886	77.1371	78.3981
chr1	6296300	6299504	LINC00337	ENSG00000225077.2	+	4.02032	4.02545	3.52666	4.83387	4.59078	3.31351	3.67681	4.20681	4.14111	3.18854	3.39451	3.27826	4.79187	3.7777	4.71909	5.93882	4.63713	3.10091
chr1	6304252	6305638	HES3	ENSG00000173673.7	+	23.4165	17.2736	16.0079	16.3397	14.6025	17.6551	0.148772	0	0	0	0	0	1.46305	1.2921	1.40072	0.689324	0.504525	0.831428
chr1	6307406	6321035	GPR153	ENSG00000158292.6	-	5.69827	6.11771	4.75608	4.96093	5.43949	5.09322	5.32863	4.57517	4.57647	4.17726	4.08961	4.31156	4.08256	2.83448	3.43908	6.47642	5.5437	6.31886
chr1	6324329	6454451	ACOT7	ENSG00000097021.15	-	111.015	112.646	106.776	125.538	121.807	118.568	60.6247	64.5361	66.923	61.7639	64.1441	58.5603	51.8399	51.5878	52.7543	57.1851	54.5104	46.4346
chr1	6453615	6454451	RP1-202O8.3	ENSG00000271746.1	+	2.3e-05	1.6e-05	3.3e-05	1.4e-05	9.7e-05	3.6e-05	8e-06	7e-06	6.8e-05	5.7e-05	0.000197	2e-06	1.3e-05	9.3e-05	0.000131	0.000204	6.2e-05	3.7e-05
chr1	6472478	6484730	HES2	ENSG00000069812.7	-	0.858366	0.838687	0.573245	0.983768	0.75445	0.591659	0	0.015468	0.089099	0	0.085721	0.035142	0	0.022354	0	0	0	0.274892
chr1	6484848	6521430	ESPN	ENSG00000187017.10	+	29.9757	34.1347	26.9768	25.8847	33.5232	33.7178	11.3491	11.3331	11.4067	15.2573	7.23782	10.9407	6.12966	4.1285	6.06025	7.76811	5.90318	3.67799
chr1	6489894	6489956	MIR4252	ENSG00000265392.1	-	0	0	0	0	0	0	0	0	0	0	0	0	0	0	0	0	0	0
chr1	6503094	6507066	RP1-202O8.2	ENSG00000231868.1	-	0	0	0	0	0	0	0	0	0	0.004343	0	0	0	0	0	0	0	0
chr1	6521211	6526255	TNFRSF25	ENSG00000215788.5	-	6.69345	5.61574	5.33394	7.23058	6.00385	7.26923	4.19013	3.58593	4.25416	4.5977	3.05911	3.71728	5.97676	4.56188	6.55788	10.3975	8.03754	10.2766
chr1	6526152	6580121	PLEKHG5	ENSG00000171680.16	-	11.6744	10.4845	9.81639	11.8095	10.9172	10.5784	11.8918	9.49359	10.3841	10.3454	7.94899	8.80213	14.2637	11.7018	15.0774	24.7157	19.9246	22.7736
chr1	6581407	6614595	NOL9	ENSG00000162408.10	-	12.1979	10.0351	9.65695	14.5393	13.6433	12.5513	11.2883	10.0321	13.2757	10.1067	9.83507	13.0233	15.4926	10.6251	14.8562	11.8547	9.49591	11.5642
chr1	6600914	6601024	RNU6-731P	ENSG00000253022.1	+	0	0	0	0	0	0	0	0	0	0	0	0	0	0	0	0	0	0
chr1	6607965	6608679	RP11-58A11.2	ENSG00000229519.2	+	0	0	0	0	0	0	0	0	0	0	0	0	0.130659	0	0	0	0	0
chr1	6615241	6639817	TAS1R1	ENSG00000173662.15	+	0.076589	0.024245	0	0	0.127773	0.086385	0.059759	0.05463	0.112204	0.094342	0.016678	0	0.154162	0.042218	0.147315	0	0	0
chr1	6640061	6649340	ZBTB48	ENSG00000204859.7	+	8.40221	9.25098	7.87873	8.76174	8.75712	10.2738	11.0965	10.9837	10.4464	9.07156	8.82938	9.2627	13.6849	12.1699	14.366	13.6288	11.5169	11.3609
chr1	6650784	6674667	KLHL21	ENSG00000162413.12	-	10.3523	9.79954	8.14939	10.6567	10.142	9.93454	6.53272	5.19469	5.57433	4.92839	4.63509	4.95104	8.57948	6.6283	7.22107	7.62194	6.73115	7.56539
chr1	6673745	6684093	PHF13	ENSG00000116273.5	+	32.8047	28.7419	27.7177	32.6102	32.7214	32.2838	35.5056	30.0069	33.8214	31.8161	27.8941	32.3635	47.2539	40.629	46.9623	44.4819	39.4329	45.4886
chr1	6684926	6695646	THAP3	ENSG00000041988.11	+	16.8818	17.1072	14.1164	14.1789	13.7383	15.0396	10.0186	9.64822	9.68408	9.67946	9.4937	9.00783	16.2418	15.7465	16.9861	17.0449	17.2389	14.9098
chr1	6694228	6761984	DNAJC11	ENSG00000007923.11	-	93.6239	71.7322	68.1635	82.0023	83.5141	80.8151	55.708	50.1364	52.5797	46.7519	58.2309	58.0928	55.1669	52.872	49.937	56.3901	49.8902	55.3593
chr1	6784697	6790072	RP11-242F24.1	ENSG00000228750.1	+	0	0	0	0	0	0	0	0	0	0	0	0	0	0	0	0	0	0
chr1	6812779	6812881	snoU13	ENSG00000239166.1	+	0	0	0	0	0	0	0	0	0	0	0	0	0	0	0	0	0	0
chr1	6843952	6844903	RP11-312B8.1	ENSG00000237436.1	-	1.96035	1.93261	1.93297	1.41009	1.32798	1.52722	1.20264	2.25249	2.11378	1.76856	1.8181	1.09649	2.04282	1.07608	0.730764	1.41816	1.23994	0.694437
chr1	6845384	7829766	CAMTA1	ENSG00000171735.14	+	92.6317	94.1862	93.4959	96.1412	99.1658	105.035	94.7569	95.2717	90.1966	96.9917	90.7099	86.8722	123.653	101.423	150.579	113.874	126.332	130.743
chr1	6894393	6894678	RP11-312B8.2	ENSG00000227950.1	-	0	0	0	0	0	0	0	0	0	0	0	0	0	0	0	0	0.173997	0
chr1	7068436	7074339	RP11-334N17.1	ENSG00000237365.1	-	0	0	0	0	0	0	0	0	0	0	0	0	0	0	0	0	0	0
chr1	7279420	7279584	RNU1-8P	ENSG00000207056.1	+	0.042976	0	0	0	0	0	0	0	0	0	0	0	0	0	0	0	0	0
chr1	7429003	7430331	CAMTA1-IT1	ENSG00000237402.1	+	0	0	0.119039	0.15214	0.468083	0	0.219527	0	0	0.093143	0.236428	0.266202	0.348247	0.392333	0.42649	0.323984	0	0.351583
chr1	7442548	7449814	RP3-453P22.2	ENSG00000237728.1	-	0	0	0	0	0	0	0	0	0	0	0	0	0	0	0	0	0	0
chr1	7501156	7501614	RP4-549F15.1	ENSG00000225126.1	-	0	0	0	0	0	0	0	0	0	0	0	0	0	0	0	0	0	0
chr1	7753184	7754904	RP11-338N10.1	ENSG00000270171.1	-	1.0653	0.478106	0.481801	0.965342	1.00632	0.614623	0.266115	0.43272	0.392692	0.892069	0.244939	0.622669	0.331786	0.620936	0.390054	0.72391	0.195332	0.85397
chr1	7758363	7758932	RP11-338N10.2	ENSG00000270035.1	-	0.414402	0.519754	0.654789	0.101362	0.505668	0.327913	0.46261	1.35367	1.38775	0.511128	0.510291	1.01938	0.748556	0.999114	0.668629	0.991687	1.84081	0.74443
chr1	7760764	7761030	RP11-338N10.3	ENSG00000269978.1	-	1.19031	1.93789	0.673039	1.73108	2.22302	1.2754	4.60452	4.65636	7.01819	4.6959	3.62473	4.8478	4.24263	4.48987	4.32163	4.05983	2.80659	2.86623
chr1	7831329	7841492	VAMP3	ENSG00000049245.8	+	46.1822	47.8569	45.4179	48.5523	46.5474	45.7022	50.926	52.1871	53.8166	52.6311	55.1924	55.3648	68.1065	65.0788	65.1888	60.8392	64.9325	66.0852
chr1	7836443	7836835	RP3-467L1.6	ENSG00000269925.1	+	2.00131	1.20939	2.36053	2.83893	2.19112	2.989	1.15736	1.90037	1.87145	2.3198	2.20604	1.52998	5.04328	2.03516	1.23188	3.90927	1.19283	2.20311
chr1	7844380	7905237	PER3	ENSG00000049246.10	+	5.06326	4.36932	4.92256	5.57234	4.9059	4.95939	3.16313	2.69969	2.7582	2.58987	2.74111	2.86336	4.4562	4.49076	4.1431	4.56151	5.03372	4.76474
chr1	7870302	7887402	RP3-467L1.4	ENSG00000236266.1	-	0	0	0	0	0	0	0	0	0	0	0	0	0	0	0	0	0	0
chr1	7903143	7913572	UTS2	ENSG00000049247.9	-	0.015621	0	0.183633	0	0.048874	0.120962	0	0.148931	0	0	0.124397	0.015889	0.535767	0.232102	0.526521	0	0	0
chr1	7979907	8000926	TNFRSF9	ENSG00000049249.4	-	0	0	0.02282	0.043949	0	0	0	0	0	0.022267	0	0	0	0	0	0	0	0
chr1	8002432	8002786	RP5-892F13.2	ENSG00000270330.1	+	0	0	0	0	0	0	0	0	0	0	0	0	0	0	0	0	0	0
chr1	8014351	8045565	PARK7	ENSG00000116288.8	+	331.698	350.88	360.633	346.386	358.167	346.624	314.028	340.094	331.256	316.679	354.003	320.062	339.932	371.531	358.558	330.572	350.923	334.027
chr1	8042941	8043043	Y_RNA	ENSG00000200344.1	-	0	0	0	0	0	0	0	0	0	0	0.218843	0.034611	0	0	0	0	0	0
chr1	8064464	8086368	ERRFI1	ENSG00000116285.8	-	47.3785	40.8279	40.8372	60.9902	57.6072	57.9357	29.9312	27.5433	26.5027	31.2714	28.3147	30.7552	63.4375	68.8173	71.6777	109.049	106.376	134.901
chr1	8086798	8182762	RP11-431K24.1	ENSG00000238290.1	+	0.090132	0.066437	0.10477	0	0	0.11778	0.07046	0.122317	0	0.101691	0	0.033719	0	0.192157	0.112975	0.096589	0.193085	0.274044
chr1	8117305	8118523	CTA-215D11.4	ENSG00000232848.1	-	0	0	0	0	0	0	0	0	0	0	0	0	0	0	0	0	0	0
chr1	8249884	8252830	RP11-431K24.2	ENSG00000229305.1	+	0	0	0	0	0	0	0	0	0	0	0	0	0	0	0	0	0	0
chr1	8266494	8266657	RNU1-7P	ENSG00000200975.1	-	0	0	0	0	0	0	0	0	0	0	0	0	0	0	0	0	0	0
chr1	8268732	8275270	RP11-431K24.3	ENSG00000227634.1	+	0	0	0	0	0	0	0	0	0	0	0	0	0	0	0	0	0	0
chr1	8278250	8280589	RP11-431K24.4	ENSG00000233645.1	-	0	0	0	0	0	0	0	0	0	0	0	0	0	0	0	0	0	0
chr1	8335184	8335438	RN7SL729P	ENSG00000265414.1	-	0	0	0	0	0	0	0	0	0	0	0	0	0	0	0	0	0	0
chr1	8352217	8352323	RNU6-991P	ENSG00000251977.1	-	0	0	0	0	0	0	0	0	0	0	0	0	0	0	0	0	0	0
chr1	8377886	8404227	SLC45A1	ENSG00000162426.10	+	1.81254	1.67018	1.46486	1.37057	1.41949	1.69465	0.413569	0.702841	0.411004	0.528964	0.237412	0.428948	0.66575	0.31457	0.286898	0.427891	0.715464	0.596989
chr1	8388127	8388239	Y_RNA	ENSG00000252254.1	+	0.510935	0	0	0	0	0	0	0	0	0	0	0	0	0	0	0	0	0
chr1	8412457	8877702	RERE	ENSG00000142599.13	-	60.6546	47.7237	43.7035	61.0137	55.2877	61.0226	51.4682	38.2606	51.0473	40.1738	32.1969	49.2785	69.2831	35.6427	56.8841	77.7237	51.0009	72.7259
chr1	8484705	8494898	RP5-1115A15.1	ENSG00000232912.1	+	0	0	0	0	0.121757	0	0	0	0	0	0.023956	0.062709	0	0	0.046735	0	0	0
chr1	8571854	8571978	SNORA77	ENSG00000221083.1	-	0	0	0	0.151735	0	0.126707	0.052371	0	0.312496	0	0.158998	0.109324	0.131956	0.049665	0.292305	0.751185	0.775036	0.212319
chr1	8572712	8573080	RP5-1115A15.2	ENSG00000270282.1	+	0	0	0	0	0	0	0	0	0	0	0	0	0	0	0	0	0	0
chr1	8810489	8811146	RP4-633I8.1	ENSG00000234619.1	+	0	0	0.044017	0.009962	0	0.059106	0.020163	0.015994	0	0.02518	0	0	0	0.026418	0	0.039843	0.007241	0.012456
chr1	8846270	8846972	RP4-633I8.2	ENSG00000224315.2	-	0.098553	0.117872	0.224895	0.134503	0.028614	0.202867	0.04358	0.147172	0.209902	0.177463	0	0.046115	0.469375	0.268167	0.195426	0.289968	0.185552	0.149233
chr1	8856633	8856731	Y_RNA	ENSG00000222511.1	-	0.872131	0	0	0	0	0	0.425845	0	0.558028	0	0	0.272069	0.710547	0.420148	0.66064	0.267516	0.227266	1.48232
chr1	8858534	8859565	RP4-633I8.3	ENSG00000226545.1	+	0	0	0	0	0	0	0	0	0	0	0	0	0	0	0	0	0	0
chr1	8865919	8867110	RP4-633I8.4	ENSG00000228423.2	-	0.312989	0.16958	0.671921	0.321594	0.266188	0.509997	0.117946	0.163165	0.422078	1.05635	0.074154	0.129602	0.423975	0.308942	0.381944	0.226593	0.197961	0.921663
chr1	8891066	8891434	RP11-185B14.1	ENSG00000229716.2	+	0	0	0	0	0	0	0	0	0	0	0	0	0	0	0	0.100047	0	0
chr1	8921061	8939308	ENO1	ENSG00000074800.9	-	4002.49	4278.44	4122.89	3588.66	3738.37	3786.77	1236.32	1273.74	1279.84	1238.88	1259.57	1161.96	1199.47	1252.2	1152.72	1167.18	1195.93	1058.63
chr1	8935847	8938066	ENO1-IT1	ENSG00000236269.1	-	2.10583	1.93512	1.43505	3.43633	1.68555	2.16145	0.466693	0.574596	0.776289	0.489343	0.540782	0.556618	0.427425	0.487307	1.07208	0.344822	0.48777	0.788557
chr1	8938894	8939953	ENO1-AS1	ENSG00000230679.1	+	0.193512	0.587052	0.751923	0	0.331345	0.222161	0.69719	0.893922	0.686895	1.14308	0.828465	1.4874	0.231413	0.934802	0.398974	0.959674	0.421793	0.105229
chr1	8943486	8943592	RNU6-304P	ENSG00000201725.1	-	0	0	0	0	0	0	0	0	0	0	0	0	0	0	0	0	0	0
chr1	8953468	8954210	HMGN2P17	ENSG00000238249.1	+	0.005769	0	0.077962	0	0.147235	0.136934	0.095068	0.043354	0.343698	0.00513	0.326464	0.228171	0.02288	0.334857	0.08014	0.122468	0.210814	0.173406
chr1	8967452	8967803	RP3-477M7.5	ENSG00000232208.2	-	0	0.044877	0	0	0.136212	0.061494	0	0.083026	0.292489	0.15221	0.123942	0	0.083382	0	0.374724	0.129198	0.144381	0.211999
chr1	8969801	8969963	RP3-477M7.6	ENSG00000232663.2	+	0	0	0	0	0	0	0	0	0	0	0	0	0	0	0	0	0	0
chr1	9005926	9035151	CA6	ENSG00000131686.10	+	0	0	0	0	0	0	0	0	0	0	0	0	0	0	0	0	0	0
chr1	9039637	9039933	RN7SL451P	ENSG00000265141.1	-	0	0	0	0	0	0	0	0	0	0	0	0	0	0	0	0	0	0
chr1	9063359	9086404	SLC2A7	ENSG00000197241.3	-	0	0	0	0	0	0	0	0	0	0	0	0	0	0	0	0	0.085309	0.038547
chr1	9095166	9148537	SLC2A5	ENSG00000142583.13	-	0.024967	0	0	0.093154	0.024214	0	0	0.040408	0.067325	0	0	0	0	0.03155	0.01737	0	0	0
chr1	9142755	9142938	SCARNA16	ENSG00000252404.1	+	0	0	0	0	0	0	0	0	0	0	0	0	0	0	0	0	0	0
chr1	9160364	9189229	GPR157	ENSG00000180758.10	-	3.18589	2.77831	2.47816	3.43934	3.40615	3.41607	2.39852	2.43427	2.81672	2.61483	2.38119	2.32631	2.64125	2.52657	2.45727	2.53752	2.65154	2.97816
chr1	9211727	9211836	MIR34A	ENSG00000207865.1	-	0.539183	0.904475	0.388964	0.535029	0.926868	0.722324	0	0	0	0.148664	0	0.009002	0.074975	0	0.046503	0	0.028876	0.099347
chr1	9242066	9262678	RP3-510D11.1	ENSG00000228526.2	-	0	0.303469	0	0.794767	0.301733	0.383935	0	0	0	0	0	0	0	0	0	0	0	0
chr1	9242263	9252148	RP3-510D11.2	ENSG00000234546.2	+	3.1327	2.77847	3.12461	1.93656	3.07426	2.95836	0.105805	0.134708	0.258336	0.06903	0.089814	0	0	0.263663	0.358705	0.405484	0.637828	0.168638
chr1	9294834	9331396	H6PD	ENSG00000049239.8	+	6.72914	5.94566	5.3742	5.58491	5.91517	5.30743	14.0458	13.0974	12.5002	13.1314	11.1166	12.0847	24.6051	22.0934	24.3174	20.4933	18.1827	20.121
chr1	9338450	9338592	Z98044.1	ENSG00000252841.1	+	0	0	0	0	0	0	0	0	0	0	0	0	0	0	0	0	0	0
chr1	9352939	9429591	SPSB1	ENSG00000171621.9	+	4.19523	5.14606	4.13564	3.9	4.22917	3.76269	10.2896	9.68256	8.90975	7.2047	8.67468	7.33954	23.5319	27.1372	27.2259	14.1261	16.226	15.9507
chr1	9497728	9497837	RNA5SP40	ENSG00000252956.1	-	0	0	0	0	0	0	0	0	0	0	0	0	0	0	0	0	0	0
chr1	9561151	9563530	RP13-392I16.1	ENSG00000235263.1	-	0	0	0	0	0	0	0	0	0	0	0	0	0	0	0	0	0	0
chr1	9599541	9645237	SLC25A33	ENSG00000171612.6	+	10.2969	10.4952	9.69209	11.2271	11.4652	10.999	11.221	11.0234	10.8865	10.7186	11.2123	10.6173	14.4731	13.657	13.7651	14.3336	15.0798	14.9276
chr1	9636485	9637043	RP13-15M17.1	ENSG00000231181.1	+	1.6699	0.35894	0.725687	1.15972	0.830019	1.14902	1.4929	0.666683	1.7789	0.541195	1.26199	1.29976	1.11954	1.84991	0.978491	1.51122	0.890692	2.11558
chr1	9648932	9674935	TMEM201	ENSG00000188807.8	+	11.8217	9.10979	8.25691	12.813	10.4982	11.6515	9.97981	6.52327	9.23766	7.5179	6.90166	6.939	14.05	8.64357	12.6306	11.036	8.90103	9.11379
chr1	9711790	9789172	PIK3CD	ENSG00000171608.11	+	13.1229	11.6983	12.7379	12.6791	13.1438	11.9827	13.6758	12.9674	13.0371	12.5304	11.8397	13.3946	14.278	12.964	13.7571	17.0122	15.5224	19.1476
chr1	9712668	9714644	C1orf200	ENSG00000179840.5	-	0	0	0	0	0	0	0	0	0	0	0	0	0	0	0	0	0	0
chr1	9720886	9722684	RP11-558F24.2	ENSG00000233268.3	-	0	0	0	0	0	0	0	0	0	0	0	0	0	0	0	0	0	0
chr1	9732484	9747613	RP11-558F24.4	ENSG00000231789.2	-	7.20004	5.89682	6.76099	6.39924	5.94249	6.6083	7.32496	5.74178	4.58189	6.10364	6.86469	5.74895	11.3208	8.27402	8.57655	9.14198	5.67255	7.54713
chr1	9789084	9884584	CLSTN1	ENSG00000171603.12	-	85.3345	80.6583	71.5995	79.3047	76.0741	77.6904	88.5515	68.5193	80.0508	73.6824	62.6281	78.6791	106.073	87.0216	103.712	116.934	92.5893	114.667
chr1	9840880	9841298	RP11-558F24.6	ENSG00000271264.1	+	0	0	0	0	0	0	0	0	0	0	0	0	0	0	0	0	0	0
chr1	9908334	9970394	CTNNBIP1	ENSG00000178585.10	-	46.8359	50.9075	42.8212	47.5134	43.0283	46.8736	64.0943	68.0778	70.4936	70.4795	66.0635	53.7944	76.372	70.5569	83.9964	82.1683	61.8737	75.702
chr1	9908376	9910212	RP11-84A14.5	ENSG00000223989.1	+	0	0	0	0.001817	0	0.00168	0.000751	0.000318	0	0	0	0	0	0.011762	0	0.004802	0	0.01127
chr1	9982173	10003465	LZIC	ENSG00000162441.7	-	20.1935	20.0855	20.5867	20.2433	20.9386	20.121	21.4899	23.0754	21.7181	25.5902	22.1663	26.3976	32.5176	34.6254	32.2098	33.8887	35.7932	33.3526
chr1	10002981	10010032	RP11-84A14.4	ENSG00000228150.1	+	0	0.189587	0	0.077972	0.062626	0.180581	0	0.249685	0.265063	0.555535	0.089789	0.254765	0.555145	0.306645	0.222551	0.447481	0.191304	0.134828
chr1	10003486	10045559	NMNAT1	ENSG00000173614.9	+	2.88166	1.6419	2.45008	3.07629	2.4733	2.49386	5.30863	5.18823	4.75976	4.46054	3.32988	4.35073	7.43937	4.83702	6.1104	6.16952	4.56731	7.61312
chr1	10007376	10007694	RN7SKP269	ENSG00000202415.1	+	0.082268	0.429172	0.088041	0.7677	0.151167	0	0.146113	0.410597	0.71634	0.170653	0.436122	0.663065	0.474487	0.289325	0.193572	1.16231	0.47795	0.277976
chr1	10027439	10027516	MIR5697	ENSG00000265521.1	+	0	0	0	0	0.250826	0	0.026857	0	0.150238	0.201379	0	0.200589	0	0	0	0.037727	0	0.296221
chr1	10043199	10044626	RP11-807G9.2	ENSG00000241326.1	+	0	0	0	0	0	0	0	0	0	0	0	0	0	0	0	0	0	0
chr1	10057264	10076078	RBP7	ENSG00000162444.11	+	6.38838	5.16731	7.58573	7.22574	5.95044	5.17157	3.0686	3.75228	4.11458	3.9654	4.26524	3.17689	1.57973	1.65421	1.56338	2.26716	1.9715	2.00006
chr1	10078085	10078592	AL590639.1	ENSG00000225786.2	-	0	0	0	0	0	0	0	0	0	0	0	0	0	0	0	0	0	0
chr1	10092890	10241297	UBE4B	ENSG00000130939.14	+	79.5385	73.3937	69.2088	88.324	80.447	84.898	71.5239	61.837	68.4588	71.758	62.4847	74.639	69.6623	60.2088	65.1028	75.5275	64.2859	73.5417
chr1	10114503	10114839	RP11-496H15.2	ENSG00000224340.1	-	0	0	0	0	0	0	0	0	0	0	0	0	0	0	0	0	0	0
chr1	10118729	10119706	PGAM1P11	ENSG00000233623.2	+	0	0.012227	0.250392	0	0	0.185945	0	0	0.120633	0.063286	0	0.026213	0.016409	0	0	0	0	0.313152
chr1	10223326	10223432	RNU6-828P	ENSG00000201746.1	+	0.328656	0.318578	1.08682	0.078203	0.36569	0.20723	0.119915	0.596109	0.91527	0	0.140441	1.21977	0.122417	0.216609	0.79223	0	0.705037	0.735353
chr1	10270863	10441661	KIF1B	ENSG00000054523.12	+	54.1398	49.3287	43.6239	55.2047	49.3631	52.9254	57.2199	52.907	55.0358	56.5556	55.1912	61.1556	54.4046	51.3981	55.1029	84.4331	81.2889	91.5135
chr1	10287776	10287861	MIR1273D	ENSG00000264881.1	+	0.433322	0.773406	0	0	0.275555	0	0	0.057052	0	0	0	0.19805	0	0.033688	0	0.522589	0.784861	0.246882
chr1	10359024	10359130	RNU6-37P	ENSG00000199562.1	+	0.407141	0.080292	0.027251	0.124026	0	0.389203	0.105231	0.836284	0.466762	0.264794	0	0.258206	1.18541	0.301705	0	0.207512	0.980867	1.56117
chr1	10366523	10366813	RN7SL731P	ENSG00000264501.1	+	0.000212	0.000499	0.000328	0.000279	0.000505	0.000342	0.000409	0.000403	0.000323	0.000216	0.00027	0.000294	0.000316	0.000681	0.00059	0.000411	0.000346	0.000422
chr1	10450059	10450353	RN7SL721P	ENSG00000265945.1	+	0.251759	0.464087	0.269993	0.899179	0.585672	1.44603	1.81523	1.20907	2.2132	2.41357	0.813392	1.32929	1.32548	1.81404	1.62254	2.72232	0.475559	2.0999
chr1	10458649	10480201	PGD	ENSG00000142657.16	+	454.486	460.037	465.938	446.027	469.301	471.027	367.731	368.42	359.988	359.622	361.241	347.948	344.1	352.493	340.828	316.5	329.577	316.228
chr1	10489938	10490734	RP4-736L20.3	ENSG00000271989.1	-	0.036575	0.01477	0.02345	0.202592	0.001244	0.084874	0.127911	0.026576	0.126614	0.052073	0.036471	0.229912	0.127793	0.212312	0.02607	0.290195	0.054524	0
chr1	10490159	10512210	APITD1	ENSG00000175279.17	+	13.7147	15.2314	16.0948	18.9275	17.608	15.6221	24.2794	24.1077	24.429	22.1797	23.9875	23.3805	27.7922	31.1992	31.4969	19.8185	20.8565	20.124
chr1	10490159	10512210	APITD1-CORT	ENSG00000251503.3	+	2.74126	1.63505	2.91762	3.09058	1.2546	1.9218	1.79804	1.66367	1.76449	2.6689	2.23486	1.58554	3.05996	2.28143	3.40188	1.75434	2.11082	2.24677
chr1	10509776	10511959	CORT	ENSG00000241563.2	+	0.105838	0.244221	0.142432	0.057365	0.408276	0.223806	0.210139	0.03611	0.159748	0.129195	0	0.113112	0.271074	0.205742	0.02365	0.684799	0.237646	0.354515
chr1	10516579	10532583	DFFA	ENSG00000160049.7	-	54.799	55.3892	49.6694	61.3635	58.2723	56.988	62.9001	56.9205	65.6501	59.8379	52.282	66.9092	113.156	86.2419	101.939	113.578	85.0529	107.132
chr1	10518612	10519395	RP5-1113E3.3	ENSG00000203469.2	+	0.021162	0.019376	0.006285	0.046476	0.028849	0.024453	0.016215	0.020451	0.02856	0.037637	0.001534	0.014911	0.076351	0.043845	0.03723	0.122781	0.023781	0.066134
chr1	10532345	10690815	PEX14	ENSG00000142655.8	+	23.2911	22.7779	20.1739	21.9542	20.8926	21.0603	25.5856	20.6699	20.4879	19.8971	19.596	17.3253	26.71	24.4476	25.4363	27.2376	24.6772	26.6899
chr1	10676893	10677170	RN7SL614P	ENSG00000243267.2	+	0	0	0	0	0.176435	0	0	0.009976	0.03011	0	0	0.04132	0.034029	0	0	0.605279	0.10188	0.074127
chr1	10696661	10856707	CASZ1	ENSG00000130940.10	-	4.04777	3.06014	3.33308	4.06094	3.28549	4.56157	5.61936	4.61426	4.39348	3.81213	3.57541	3.98668	2.24807	1.64646	1.65055	3.69934	2.67049	3.03309
chr1	10699298	10714390	RP4-734G22.3	ENSG00000272078.1	+	0.013084	0.028417	0.024484	0.037055	0.004252	0.030411	0.079898	0.041322	0.065633	0.031466	0.025259	0.026586	0.024077	0.033005	0.023867	0.053751	0.060437	0.013596
chr1	10955818	10956055	RP11-340B24.3	ENSG00000225158.2	+	0	0	0	0	0	0	0	0	0	0	0	0	0	0	0	0	0	0
chr1	11006528	11042094	C1orf127	ENSG00000175262.10	-	0.394508	0.492116	0.376346	0.595701	0.550885	0.393352	0.374789	0.405759	0.383013	0.456295	0.377863	0.221043	0.200044	0.073002	0	0.03459	0.038156	0.110825
chr1	11051035	11051854	CFL1P6	ENSG00000215785.2	-	0	0	0	0	0	0	0	0.079888	0	0	0	0	0	0.196466	0	0	0	0.446228
chr1	11058233	11058320	AL713997.1	ENSG00000264181.1	-	0	0	0	0	0	0	0	0	0	0	0	0	0	0	0	0	0	0
chr1	11059919	11060002	Y_RNA	ENSG00000207213.1	-	0	0	0	0	0	0	0	0	0	0	0	0.209839	0	0	0.334933	0	0	0
chr1	11072414	11085796	TARDBP	ENSG00000120948.11	+	292.64	303.403	296.505	307.125	310.952	319.503	240.3	236.589	258.023	238.992	247.17	257.225	267.962	257.017	260.819	263.587	255.355	256.107
chr1	11086580	11107290	MASP2	ENSG00000009724.12	-	0.295868	0.121067	0.039059	0.211336	0.437557	0.393311	0	0	0.030705	0.019552	0.182247	0.194467	0.035333	0.069169	0.033202	0.31717	0.051247	0.190527
chr1	11089716	11090585	RP4-635E18.8	ENSG00000271895.1	+	5.44114	3.4372	3.25941	6.15311	4.8803	4.39121	8.43052	5.82703	8.64811	7.83225	6.38501	9.96743	8.80069	8.00163	8.25721	8.73088	6.22193	8.25722
chr1	11114641	11120081	SRM	ENSG00000116649.5	-	130.37	119.861	108.688	129.229	136.644	125.065	79.2584	66.0184	80.047	59.9719	59.709	66.3636	92.9661	63.9404	75.947	77.7093	59.606	64.9367
chr1	11126675	11159938	EXOSC10	ENSG00000171824.9	-	66.8531	69.0497	64.8578	69.2583	66.4913	70.0428	72.888	72.9575	77.3912	74.9441	73.4093	79.1487	71.785	75.7297	69.8197	69.1895	70.8012	71.2322
chr1	11128528	11133154	RP4-635E18.7	ENSG00000226849.1	+	0.066659	0.102077	0.038569	0.025683	0.086685	0.073221	0.064402	0.039683	0.07828	0.054282	0.01191	0.126399	0.141187	0.124792	0.100199	0.122048	0.209076	0.286212
chr1	11159732	11162157	RP4-635E18.6	ENSG00000230337.1	+	0.694863	0.603487	0.708144	0.961269	0.492572	0.494768	2.67099	1.37193	1.05857	1.09756	1.25652	1.0692	0.629213	0.951063	2.09252	0.963256	0.275418	0.229237
chr1	11166592	11322564	MTOR	ENSG00000198793.8	-	52.8049	47.5198	46.3829	55.1717	52.1024	51.6081	51.3448	48.7834	50.4385	47.9863	46.1883	49.3026	54.7967	53.4502	51.1461	55.9303	50.5668	53.4932
chr1	11203955	11209594	MTOR-AS1	ENSG00000225602.1	+	0	0	0	0	0	0	0	0	0	0	0	0	0	0	0	0	0	0
chr1	11212407	11212509	RNU6-537P	ENSG00000253086.1	+	0	0	0	0	0	0	0	0	0	0	0	0	0	0	0	0	0	0.357704
chr1	11229564	11229670	snoU13	ENSG00000271794.1	-	0	0	0	0	0	0	0	0	0	0	0	0	0	0	0	0	0	0
chr1	11249398	11256038	ANGPTL7	ENSG00000171819.4	+	0	0	0	0	0	0	0	0	0	0	0	0	0	0.075637	0	0	0.016913	0
chr1	11286311	11286417	RNU6-291P	ENSG00000207451.1	+	0	0	0	0	0	0	0	0	0	0	0	0	0	0	0	0	0	0
chr1	11293020	11293169	RPL39P6	ENSG00000238173.1	+	0	0	0	0	0	0	0	0	0.046938	0	0	0	0	0	0	0	0	0
chr1	11333263	11356106	UBIAD1	ENSG00000120942.9	+	18.2448	16.5557	15.8885	21.1578	17.3779	16.8005	10.9936	10.5587	13.6134	10.6674	10.9619	10.7819	17.616	14.9334	13.9324	12.7962	13.2019	11.3485
chr1	11338673	11339408	UBE2V2P3	ENSG00000238199.1	-	0	0	0	0	0	0	0	0	0	0.034221	0	0	0	0	0	0	0	0
chr1	11485314	11485878	RP11-149P14.1	ENSG00000224338.2	-	0	0	0	0	0	0	0	0	0	0	0	0	0	0	0	0	0	0
chr1	11539223	11597641	PTCHD2	ENSG00000204624.6	+	3.08137	2.56953	2.86895	3.29521	2.88685	2.6325	0.829745	0.618165	0.834581	0.460257	0.331051	0.624171	3.6643	3.46932	4.29396	0.667995	0.676867	0.783786
chr1	11669588	11673412	RP1-69M21.2	ENSG00000235643.1	+	0.062903	0.145362	0	0	0	0.064093	0	0	0	0	0.227662	0.120063	0	0	0	0	0.178594	0
chr1	11708424	11715842	FBXO2	ENSG00000116661.9	-	41.8976	40.7049	38.1511	38.6588	37.1234	36.1745	11.8467	11.5729	11.5755	12.8049	10.5947	10.1536	15.4428	11.8521	13.7476	14.605	13.434	12.3419
chr1	11714432	11723384	FBXO44	ENSG00000132879.9	+	21.6902	22.9584	19.1796	22.2995	18.9502	27.597	12.0282	10.7944	13.125	10.8221	9.33853	8.87116	18.0426	15.2168	19.0401	21.4521	24.6469	18.5141
chr1	11724181	11734411	FBXO6	ENSG00000116663.6	+	0.57373	0.655466	0.548828	0.446311	0.355775	0.696053	1.6117	1.22149	1.03031	1.28572	1.17658	1.12263	2.07123	2.57649	1.73965	1.69178	1.90086	1.63183
chr1	11734537	11751707	MAD2L2	ENSG00000116670.10	-	324.663	322.168	305.188	278.274	277.795	280.323	128.465	130.699	137.781	146.346	139.575	119.881	182.072	183.033	170.263	202.813	205.641	182.458
chr1	11751786	11785914	DRAXIN	ENSG00000162490.6	+	8.39644	8.58363	7.77049	9.34889	9.23196	8.69614	7.67064	6.85657	7.94453	6.71107	6.13309	7.36631	8.59148	6.77248	7.58968	8.77783	7.58735	7.79512
chr1	11796141	11814859	AGTRAP	ENSG00000177674.11	+	61.3319	65.4458	63.7023	62.2509	63.3925	58.9934	49.8279	42.8987	42.6156	43.7332	37.5058	33.896	76.1441	76.8256	72.2509	63.4364	60.2349	59.9546
chr1	11821844	11849642	C1orf167	ENSG00000215910.3	+	0.319613	0.640161	0.404143	0.596682	0.340503	0.414597	0.264836	0.246155	0.091346	0.233677	0.07917	0.218418	0.463142	0.352231	0.442336	0.489812	0.268982	0.625915
chr1	11837134	11839676	RP11-56N19.5	ENSG00000177553.6	-	0	0	0	0	0	0	0	0	0	0	0	0	0	0	0	0	0	0
chr1	11845780	11866977	MTHFR	ENSG00000177000.6	-	7.02802	6.97197	4.7968	7.0316	8.40133	7.38324	11.6309	10.7569	10.933	11.8311	10.5617	11.9179	15.6713	10.9772	11.6247	10.8097	11.214	12.1823
chr1	11866207	11903201	CLCN6	ENSG00000011021.17	+	17.4943	15.6223	12.5022	20.9701	18.6128	20.5152	17.9145	14.3774	16.2577	16.5902	12.4809	17.4867	17.1804	13.6178	13.3984	18.0598	13.3196	14.9116
chr1	11901074	11908136	NPPA-AS1	ENSG00000242349.1	+	0.356274	0.071562	0.144093	0.566406	0.71842	0.504268	2.18954	0.583807	0.837506	1.56363	0.681656	1.92608	0.488366	0.894302	0.565983	1.42955	0.886863	0.939736
chr1	11905766	11908402	NPPA	ENSG00000175206.6	-	0	0	0	0	0	0	0	0.420149	0	0	0.415586	0	0.170539	0.160511	0.238983	0	0	0
chr1	11917521	11918988	NPPB	ENSG00000120937.8	-	0.293065	0	0.117296	0	0.287864	0	3.69502	2.73018	2.59877	0.863168	0.433759	0.216314	50.4779	44.8314	49.1275	24.6223	26.8703	29.6932
chr1	11937827	11940463	RP5-934G17.6	ENSG00000224904.1	+	0	0	0	0	0	0	0	0	0	0	0	0	0	0	0	0	0	0
chr1	11968209	11968328	RNU5E-1	ENSG00000199347.1	+	0.411148	0.027714	0.299868	0.013946	0.622296	0.178181	0	0	0	0.154207	0	0.262417	0.691313	0.162153	0	0.138233	0.549249	0.465786
chr1	11969865	11969984	RNU5E-4P	ENSG00000201801.1	-	0	0	0	0	0	0	0	0.060468	0.279014	0.32993	0.391839	0	0	0	0.109615	0	0	0
chr1	11979648	11986485	KIAA2013	ENSG00000116685.11	-	29.8196	27.6804	27.5947	26.5331	30.094	27.6271	23.7806	21.9458	21.7259	22.5176	20.6793	20.6803	35.663	32.6895	31.4081	37.6261	35.3072	35.9037
chr1	11994262	12035595	PLOD1	ENSG00000083444.12	+	37.1385	39.8499	37.327	34.9893	37.1022	33.4403	54.0716	55.724	45.826	45.4244	44.175	41.7693	82.7073	75.547	82.4473	102.093	102.304	112.379
chr1	12040238	12073571	MFN2	ENSG00000116688.12	+	36.2805	36.2593	35.5404	38.5749	38.0963	39.488	37.4027	36.0669	38.0829	36.7808	36.7845	35.7253	42.5004	41.405	43.4807	43.8751	40.9449	42.0747
chr1	12077273	12077365	RP5-1077B9.5	ENSG00000270914.1	-	0	0	0	0	0.275555	0	0	0.24773	0	0.860687	0	0.161848	0	0	0	0	0.216312	0
chr1	12079523	12092102	MIIP	ENSG00000116691.6	+	37.5595	30.1482	32.3724	32.9724	33.2019	29.5908	31.7275	30.0909	29.6427	29.7959	24.0876	23.1848	40.7769	36.9257	39.9053	36.0325	29.6277	30.7745
chr1	12084069	12084181	Y_RNA	ENSG00000202461.1	-	0	0	0	0	0	0	0	0	0	0	0	0	0	0	0	0	0	0
chr1	12096799	12097071	RN7SL649P	ENSG00000243539.2	-	0	0	0	0	0	0	0	0	0	0	0	0	0	0	0	0	0	0
chr1	12123434	12204264	TNFRSF8	ENSG00000120949.10	+	12.7256	11.8999	11.1862	15.695	13.7712	13.1997	1.87113	1.57588	1.86325	1.46777	1.63458	1.54438	1.51147	1.24778	1.17871	1.55254	1.2827	1.01056
chr1	12137938	12138041	RNU6-777P	ENSG00000201135.1	-	0	0	0	0	0	0	0	0	0	0	0	0	0	0	0	0	0	0
chr1	12140350	12140604	RP11-426M1.2	ENSG00000227875.2	-	0	0	0	0	0	0	0	0	0	0	0	0	0	0	0	0	0	0
chr1	12227060	12269285	TNFRSF1B	ENSG00000028137.12	+	1.82949	1.36236	1.50666	1.55011	1.94011	1.63336	0.111553	0.142717	0.177802	0.219787	0.096542	0.281669	0.18935	0.159398	0.141272	0.302018	0.233291	0.077825
chr1	12251770	12251830	MIR4632	ENSG00000263676.1	+	0	0	0	0	0	0	0	0	0	0	0	0	0	0	0	0	0	0
chr1	12280851	12281166	RP5-1118D24.2	ENSG00000225196.2	-	0	0	0	0	0	0	0	0	0	0	0	0	0	0	0	0	0	0
chr1	12281205	12281328	SNORA70	ENSG00000252969.1	-	0	0	0	0	0	0	0	0	0	0	0	0	0	0	0	0	0	0
chr1	12290124	12572099	VPS13D	ENSG00000048707.9	+	11.9345	10.389	9.31381	11.7416	10.6859	12.0624	11.0967	10.4459	9.76292	10.8825	9.43047	10.4297	10.2667	11.0765	10.8698	11.6264	11.2865	12.4822
chr1	12567300	12567451	SNORA59A	ENSG00000239149.1	+	0.849459	2.16696	3.49549	3.22324	1.19649	1.68369	0.805376	0.327002	0.949015	1.01428	0.603544	1.20329	2.20703	1.37369	1.99157	3.00691	2.40231	2.80702
chr1	12587766	12588462	RP5-888M10.2	ENSG00000229484.1	+	0	0	0	0	0	0	0	0	0	0	0	0	0	0	0	0	0	0
chr1	12627939	12677737	DHRS3	ENSG00000162496.4	-	17.1298	14.704	16.8073	15.3272	15.1358	14.6962	0.386475	0.381276	0.36403	0.353022	0.420603	0.384955	3.90915	5.22332	5.39256	1.25718	2.11872	1.67284
chr1	12630000	12630100	RNU6ATAC18P	ENSG00000221340.1	-	0.893836	0.738118	0.78642	0.397676	0.081848	0.227382	0	0	0	0	0	0.325509	0	0	0	0	0	0
chr1	12678906	12679250	RP11-474O21.5	ENSG00000272482.1	-	0.896841	1.10293	0.48653	0.748652	0.222841	0.047438	0.12144	0	0	0	0	0	0	0	0	0	0	0
chr1	12704566	12727097	AADACL4	ENSG00000204518.2	+	0	0	0	0	0	0	0	0	0	0	0	0	0	0	0	0	0	0
chr1	12752925	12753036	RP11-474O21.2	ENSG00000226166.2	+	0	0	0	0	0	0	0	0	0	0	0	0	0	0	0	0	0	0
chr1	12776118	12788726	AADACL3	ENSG00000188984.7	+	0.246789	0.185505	0.143777	0.415304	0.372647	0.189271	0	0.017925	0.028833	0.131563	0	0.069721	0	0	0	0	0	0
chr1	12799693	12799796	snoU13	ENSG00000238771.1	+	0	0	0.559088	0.278925	0.325897	0	0	0	0	0	0	0	0	0	0	0	0	0
chr1	12806163	12823847	C1orf158	ENSG00000157330.5	+	0	0	0	0	0	0	0	0	0	0	0	0	0	0	0	0.014143	0	0
chr1	12834984	12838049	PRAMEF12	ENSG00000116726.4	+	0	0	0	0.031235	0	0	0	0	0	0	0	0	0	0	0	0	0	0
chr1	12851546	12856777	PRAMEF1	ENSG00000116721.9	+	0	0	0	0	0	0	0	0	0	0	0	0	0	0	0	0	0	0
chr1	12882549	12883022	RP5-845O24.8	ENSG00000228338.1	-	0	0	0	0	0	0	0	0	0	0	0	0	0	0	0	0	0	0
chr1	12884468	12891264	PRAMEF11	ENSG00000204513.5	-	0	0	0	0	0	0	0	0	0	0	0	0	0	0	0	0	0	0
chr1	12897978	12901210	RP5-845O24.3	ENSG00000231103.2	-	0	0	0	0	0	0	0	0	0	0	0	0	0	0	0	0	0	0
chr1	12907261	12908578	HNRNPCL1	ENSG00000179172.7	-	0.369107	0.67571	0.785315	0.448512	0.28683	1.16582	0.560128	0.411533	0.535616	0.635537	0.360026	0.620248	0.174846	0.480521	0.762092	0.248919	1.03494	0.646366
chr1	12916941	12921764	PRAMEF2	ENSG00000120952.4	+	0	0	0	0	0	0	0	0	0	0	0	0	0	0	0	0	0	0
chr1	12939045	12946025	PRAMEF4	ENSG00000243073.3	-	0	0	0	0	0	0	0	0	0	0	0	0	0	0	0	0	0	0
chr1	12952727	12958101	PRAMEF10	ENSG00000187545.5	-	0	0	0	0	0	0	0	0	0	0	0	0	0	0	0	0	0	0
chr1	12976450	12980569	PRAMEF7	ENSG00000204510.1	+	0	0	0	0	0	0	0	0	0	0	0	0	0	0	0	0	0	0
chr1	12982374	12982480	RNU6-1072P	ENSG00000207434.1	+	0	0	0	0	0	0	0	0	0	0	0	0	0	0	0	0	0	0
chr1	12985990	12988081	RP11-450I1.2	ENSG00000234064.1	+	0	0	0	0	0	0	0	0	0	0	0	0	0	0	0	0	0	0
chr1	12998181	13117751	PRAMEF6	ENSG00000232423.3	-	0	0	0	0	0	0	0	0	0	0	0	0	0	0	0	0	0	0
chr1	13012966	13015755	RP11-450I1.4	ENSG00000250894.1	-	0	0	0	0	0	0	0	0	0	0	0	0	0	0	0	0	0	0
chr1	13035543	13038381	PRAMEF22	ENSG00000204508.3	+	0	0	0	0	0	0	0	0	0	0	0	0	0	0	0	0	0	0
chr1	13052394	13052998	WI2-3308P17.2	ENSG00000239810.2	-	0	0	0	0	0	0	0	0	0	0	0	0	0	0	0	0	0	0
chr1	13108842	13112679	PRAMEF23	ENSG00000270601.1	-	0	0	0	0	0	0	0	0	0	0	0	0	0	0	0	0	0	0
chr1	13123246	13126086	RP13-221M14.6	ENSG00000250113.1	-	0	0	0	0	0	0	0	0	0	0	0	0	0	0	0	0	0	0
chr1	13140456	13145000	PRAMEF25	ENSG00000204505.3	+	0	0	0	0	0	0	0	0	0	0	0	0	0	0	0	0	0	0
chr1	13146777	13147256	RP13-221M14.2	ENSG00000233336.1	+	0	0	0	0	0	0	0	0	0	0	0	0	0	0	0	0	0	0
chr1	13162645	13165443	RP13-221M14.3	ENSG00000229978.1	-	0	0	0	0	0	0	0	0	0	0	0	0	0	0	0	0	0	0
chr1	13171871	13173157	RP13-221M14.4	ENSG00000236179.1	-	0	0	0	0	0	0	0	0	0	0	0	0	0	0	0	0	0	0
chr1	13182960	13184326	HNRNPCP5	ENSG00000179412.8	-	0.292555	0.203287	0.699886	0.415746	0.387343	0.891015	0.467173	0.281603	0.498737	0.576807	0.242788	0.379897	0.081866	0.257693	0.72246	0.093691	0.979985	0.661012
chr1	13196270	13199067	WI2-2994D6.1	ENSG00000224199.1	+	0	0	0	0	0	0	0	0	0	0	0	0	0	0	0	0	0	0
chr1	13216356	13219581	PRAMEF26	ENSG00000229571.2	-	0	0	0	0	0	0	0	0	0	0	0	0	0	0	0	0	0	0
chr1	13328196	13331692	PRAMEF3	ENSG00000204503.5	-	0	0	0	0	0	0	0	0	0	0	0	0	0	0	0	0	0	0
chr1	13351482	13354323	RP11-248D7.2	ENSG00000233394.1	+	0	0	0	0	0	0	0	0	0	0	0	0	0	0	0	0	0	0
chr1	13359819	13369057	PRAMEF5	ENSG00000204502.2	+	0	0	0	0	0	0	0	0	0	0	0	0	0	0	0	0	0	0
chr1	13379149	13381237	RP11-219C24.8	ENSG00000231219.1	-	0	0	0	0	0	0	0	0	0	0	0	0	0	0	0	0	0	0
chr1	13384735	13384841	RNU6-771P	ENSG00000207511.1	-	0	0	0	0	0	0	0	0	0	0	0	0	0	0	0	0	0	0
chr1	13386646	13390765	PRAMEF8	ENSG00000182330.6	-	0	0	0	0	0	0	0	0	0	0	0	0	0	0	0	0	0	0
chr1	13411551	13414482	RP11-219C24.6	ENSG00000237700.1	+	0	0	0	0	0	0	0	0	0	0	0	0	0	0	0	0	0	0
chr1	13421176	13428191	PRAMEF9	ENSG00000204501.2	+	0.013875	0	0	0	0	0	0	0	0	0	0	0	0	0	0	0	0	0
chr1	13429634	13430113	RP11-219C24.10	ENSG00000228229.2	+	0	0	0	0	0	0	0	0	0	0	0	0	0	0	0	0	0	0
chr1	13447414	13452656	PRAMEF13	ENSG00000204495.3	-	0	0	0	0	0	0	0	0	0	0	0	0	0	0	0	0	0	0
chr1	13474689	13477522	PRAMEF18	ENSG00000204491.2	-	0	0	0	0	0	0	0	0	0	0	0	0	0	0	0	0	0	0
chr1	13495254	13498260	PRAMEF16	ENSG00000204488.3	+	0	0	0	0	0	0	0	0	0	0	0	0	0	0	0	0	0	0
chr1	13516066	13526943	PRAMEF21	ENSG00000204486.3	+	0	0	0	0	0	0	0	0	0	0	0	0	0	0	0	0	0	0
chr1	13607431	13611550	XX-FW84067D5.1	ENSG00000204485.2	-	0	0	0	0	0	0	0	0	0	0	0	0	0	0	0	0	0	0
chr1	13632348	13635279	XX-FW84067D5.2	ENSG00000224581.1	+	0	0	0	0	0	0	0	0	0	0	0	0	0	0	0	0	0	0
chr1	13641973	13648988	PRAMEF15	ENSG00000157358.7	+	0.013875	0	0	0	0	0	0	0	0	0	0	0	0	0	0	0	0	0
chr1	13668269	13673511	PRAMEF14	ENSG00000204481.6	-	0	0	0	0	0	0	0	0	0	0	0	0	0	0	0	0	0	0
chr1	13694889	13698405	PRAMEF19	ENSG00000204480.6	-	0	0	0	0	0	0	0	0	0	0	0	0	0	0	0	0	0	0
chr1	13716092	13719089	PRAMEF17	ENSG00000204479.4	+	0	0	0	0	0	0	0	0	0	0	0	0	0	0	0	0	0	0
chr1	13736907	13747803	PRAMEF20	ENSG00000204478.5	+	0	0	0	0	0	0	0	0	0	0	0	0	0	0	0	0	0	0
chr1	13801445	13840543	LRRC38	ENSG00000162494.5	-	0.160146	0.422543	0.190809	0.314154	0.219546	0.34535	0.179469	0.027291	0.038524	0.088056	0.135945	0.118346	1.78691	1.75788	2.58947	4.61985	3.66514	3.66159
chr1	13839715	13842765	RP4-597A16.2	ENSG00000259961.1	+	0	0	0	0	0	0	0	0.061446	0	0	0	0	0.350362	0.371027	0.138487	0.511936	0.271395	0.160286
chr1	13881496	13882189	RP4-597A16.3	ENSG00000215909.3	+	0	0	0	0	0	0	0	0	0	0	0	0	0	0	0	0	0	0
chr1	13909960	13944452	PDPN	ENSG00000162493.12	+	71.9657	65.6939	66.9299	86.1918	78.618	70.0955	14.3339	13.8015	15.4984	15.9782	16.7928	20.0394	45.9933	47.4699	47.6123	120.097	107.627	112.725
chr1	13949679	13949779	RNA5SP41	ENSG00000222952.1	-	0	0	0	0	0	0	0	0	0	0	0	0	0	0	0	0	0	0
chr1	13950397	13950497	AL359771.1	ENSG00000266358.1	-	0	0	0	0	0	0	0	0	0	0	0	0	0	0	0	0	0	0
chr1	13983806	13986405	CTA-520D8.2	ENSG00000237445.2	-	0	0	0	0	0	0	0	0	0	0	0	0	0	0	0	0	0	0
chr1	14022565	14022694	SCARNA11	ENSG00000253085.1	-	0	0	0	0	0	0	0	0	0	0	0	0	0.022391	0	0	0	0	0
chr1	14026693	14151574	PRDM2	ENSG00000116731.18	+	10.8644	12.2491	9.10668	9.74657	9.69768	11.2939	17.9079	13.3703	16.5219	14.8513	14.5441	18.0143	18.9503	17.3085	16.1378	16.2795	15.3852	17.7279
chr1	14450728	14450830	RNU6-1265P	ENSG00000252151.1	-	0	0	0	0	0	0	0	0	0	0	0	0	0	0	0	0	0	0
chr1	14548386	14549613	RP11-344F13.1	ENSG00000231606.1	-	0	0	0	0	0	0.561643	0	0	0	0	0	0	0	0	0	0	0	0
chr1	14675450	14677518	RP4-704D23.1	ENSG00000234593.1	-	0	0	0	0	0	0	0	0	0	0	0	0	0	0	0	0	0	0
chr1	14925200	15444539	KAZN	ENSG00000189337.11	+	8.03458	7.16025	6.6912	8.93312	7.33925	7.88133	7.40389	6.7499	7.55555	6.89937	6.36692	7.37515	10.3246	8.87149	9.18272	11.6318	10.6881	11.9098
chr1	15018625	15019109	TBCAP2	ENSG00000235829.1	-	0	0	0	0	0	0	0	0	0	0	0	0	0	0	0	0	0	0
chr1	15442448	15478960	TMEM51-AS1	ENSG00000175147.7	-	0.151113	0.066603	0.092513	0.167521	0.031857	0.084211	0.22874	0.179955	0.039963	0.070422	0.072042	0.121054	0.639516	0.507562	0.468184	0.123904	0.117511	0.232713
chr1	15479028	15546976	TMEM51	ENSG00000171729.9	+	9.49945	6.63798	7.80323	8.11387	9.41077	8.40874	6.87171	6.79702	6.7498	6.18327	6.22016	6.33551	15.7155	14.8196	14.7697	9.93828	10.1259	9.82645
chr1	15490840	15497813	C1orf195	ENSG00000204464.3	-	0	0.125057	0	0	0	0	0	0	0	0	0	0	0	0	0	0	0	0
chr1	15518324	15519341	RP1-21O18.3	ENSG00000215720.4	-	0	0	0	0	0	0	0	0	0	0	0	0	0	0	0	0	0	0
chr1	15573768	15726779	FHAD1	ENSG00000142621.15	+	0.305772	0.112598	0.267013	0.622869	0.399054	0.301679	1.18402	0.841116	0.803407	0.814224	0.850342	1.26407	1.9409	1.50013	1.98903	0.548704	1.03463	0.868582
chr1	15653176	15670372	RP3-467K16.2	ENSG00000233485.1	-	0	0	0	0	0	0	0	0	0	0	0	0	0	0	0	0	0	0
chr1	15660662	15661960	RP3-467K16.7	ENSG00000236045.1	-	0	0	0	0	0	0	0	0	0	0	0	0	0	0	0	0	0	0
chr1	15729475	15735929	RP3-467K16.4	ENSG00000228140.1	-	0.071209	0.026145	0.050256	0.015729	0	0.03436	0.071558	0.151032	0.069781	0.088304	0.161396	0.110691	0.028248	0.042922	0.06252	0.073621	0	0.024663
chr1	15736391	15756839	EFHD2	ENSG00000142634.8	+	15.9372	13.0641	13.8817	16.2037	14.0833	13.0264	33.3154	34.1513	28.758	25.5427	25.0963	24.2639	32.4823	29.1789	31.6969	30.6641	25.6093	24.1861
chr1	15764935	15775737	CTRC	ENSG00000162438.7	+	0.033357	0	0	0.07906	0	0	0	0	0	0	0	0.032411	0	0	0	0	0	0.059232
chr1	15783223	15798586	CELA2A	ENSG00000142615.7	+	0	0	0	0	0	0	0	0	0	0	0	0	0	0	0	0	0	0
chr1	15792404	15817895	CELA2B	ENSG00000215704.5	+	0	0	0	0	0	0	0	0	0	0	0	0	0	0	0	0	0	0
chr1	15817327	15853029	CASP9	ENSG00000132906.13	-	12.4149	11.4803	10.4391	10.6209	11.2602	9.41626	13.5437	12.4785	10.7181	11.6641	11.1535	10.0058	15.8395	17.7184	16.4655	14.0591	13.8905	15.1857
chr1	15853308	15918874	DNAJC16	ENSG00000116138.8	+	12.1603	11.0105	11.1844	12.9074	11.3266	12.7802	14.303	14.3092	13.6696	13.5234	12.3513	13.2399	15.1881	15.0131	15.5774	14.2713	13.3468	13.7414
chr1	15868660	15868799	SCARNA21	ENSG00000251866.1	+	0	0.290994	0	0	0.047238	0	0	0	0	0	0.060594	0.212197	0	0	0.255767	0	0	0
chr1	15892106	15892451	RP4-680D5.8	ENSG00000272510.1	-	0.123102	0.137003	0.485877	0.162938	0.492298	0.69168	0.498311	0.039815	0.567036	0.235459	0.139506	0.233655	0.125875	0.217193	0.047068	0.328265	0.288843	0.30843
chr1	15898848	15911605	AGMAT	ENSG00000116771.5	-	5.2785	5.65066	5.22715	5.67804	5.98675	5.70259	3.4643	3.51447	4.41775	3.30255	3.19133	3.83617	3.1672	3.04687	2.57818	1.70972	2.11067	2.10303
chr1	15912631	15930121	RP4-680D5.2	ENSG00000237301.1	-	0	0.026009	0	0	0	0.034516	0	0.043189	0.077379	0.110649	0	0.126905	0.108196	0.088449	0	0.152423	0	0.036217
chr1	15931077	15931538	CHCHD2P6	ENSG00000235084.2	+	0.564205	0.198398	0.239471	0.231502	0.609259	0.419521	0.338986	0.622792	0.483806	0.448119	0.16809	0.251091	0.108531	0.438505	0.034331	0.139654	0.059217	0.720629
chr1	15934573	15934640	RNU7-179P	ENSG00000252417.1	-	0	0	0	0	0	0	0	0	0	0	0.185345	0	0	0	0	0	0	0
chr1	15941138	15941362	RP4-680D5.4	ENSG00000236500.1	-	0	0	0	0	0	0	0	0	0	0	0	0	0	0	0	0	0	0
chr1	15943995	15995539	DDI2	ENSG00000197312.7	+	17.9336	15.3858	14.6723	21.5542	18.7143	21.393	19.3727	16.6378	19.5013	17.8719	16.5503	20.8554	22.0477	19.5025	19.9532	19.1898	18.3891	20.8994
chr1	15986364	15988217	RSC1A1	ENSG00000215695.1	+	0.009189	0.118453	0.081557	0.062059	0.05404	0.052577	0.037428	0.252193	0.070122	0.182412	0.145644	0.174101	0.149235	0.136163	0.122864	0.14803	0.068503	0.018007
chr1	16009368	16009623	RP4-680D5.9	ENSG00000271742.1	-	0	0	0	0	0	0	0	0	0.10354	0	0.14391	0	0.19898	0	0.259764	0.188097	0.164402	0
chr1	16010827	16061264	PLEKHM2	ENSG00000116786.7	+	29.1589	27.6611	25.3293	26.695	27.0787	27.0884	40.2206	37.6378	36.4216	34.7394	32.6422	31.3887	37.7397	33.0352	35.7167	41.6264	36.6379	38.2112
chr1	16010967	16011053	AL121992.1	ENSG00000264048.1	+	0	0	0	1e-06	0	1e-06	1e-06	1e-06	0	0	0	0	0	0	0	0	0	0
chr1	16049214	16063391	RP11-288I21.1	ENSG00000237938.1	-	0	0	0	0	0	0	0	0	0	0	0	0	0	0	0	0	0	0
chr1	16062900	16067891	SLC25A34	ENSG00000162461.7	+	0.068465	0.145407	0.114925	0.126759	0.137593	0.339911	0.639405	0.702997	0.554101	0.651986	0.578186	0.807907	0.58137	0.132091	0.21524	0.343668	0.232431	0.278877
chr1	16066546	16076391	RP11-169K16.4	ENSG00000224459.1	-	0	0	0	0	0	0	0	0	0	0	0.155477	0	0	0	0	0	0	0
chr1	16068917	16074477	TMEM82	ENSG00000162460.6	+	0.229458	0.35572	0.505666	0.496377	0.116567	0.288459	0.691503	0.692178	0.522968	0.667457	0.509943	0.310757	1.31991	1.36593	1.83941	0.83458	1.58401	1.07954
chr1	16083102	16113089	FBLIM1	ENSG00000162458.8	+	48.7705	33.735	28.5727	54.4377	35.0089	37.4801	39.3552	38.346	37.0804	51.5913	28.5982	40.0511	35.1358	28.2407	30.7011	42.162	36.8179	39.683
chr1	16119291	16119780	RP11-169K16.6	ENSG00000224321.1	+	0.662513	0.209126	0.589686	2.11281	0.759183	1.484	0.216965	1.62784	0.296223	0.802502	0.344503	0.162577	0.288604	0.622505	0.103463	0.519745	0.953047	0.042587
chr1	16133679	16134194	RP11-169K16.7	ENSG00000233954.4	-	34.216	28.8522	30.4585	36.0596	37.6404	34.888	19.8927	24.6726	24.7548	24.002	25.2296	25.087	21.6798	21.8248	23.6868	28.5298	25.3105	23.1881
chr1	16154724	16155167	RP11-169K16.8	ENSG00000178715.7	+	1.48597	1.75526	2.26823	1.67313	2.70281	4.64968	1.77978	0.920747	1.85311	1.75171	1.62524	1.09289	1.12367	1.01793	1.91659	1.75852	1.62112	0.723313
chr1	16160560	16174642	RP11-169K16.9	ENSG00000179743.2	-	8.59274	8.27248	8.47032	6.15763	6.40822	6.85516	6.13979	6.62983	6.44793	7.23482	7.08902	7.03012	7.47502	7.01952	7.47708	9.80027	9.25526	11.2357
chr1	16174359	16266955	SPEN	ENSG00000065526.6	+	26.9069	21.7987	19.2086	28.759	26.0674	27.8055	31.9674	24.6759	31.3578	26.6975	20.102	33.328	34.0401	23.4122	31.0644	45.6241	33.182	47.0068
chr1	16237392	16237492	snoU13	ENSG00000238818.1	+	0	0	0	0	0	0	0	0	0	0.215172	0	0	0.461116	0	0	0	0	0.098925
chr1	16244193	16244403	RP1-134O19.3	ENSG00000270620.1	-	0	0	0	0	0	0	0	0	0	0	0	0	0	0	0	0	0	0
chr1	16268364	16302627	ZBTB17	ENSG00000116809.7	-	10.7994	9.2277	8.98838	9.92361	10.5412	10.098	12.9851	11.4394	11.4117	12.7114	9.87925	10.3354	15.3851	13.4508	14.9611	14.766	14.1782	15.4345
chr1	16296127	16296689	RP11-5P18.1	ENSG00000234607.2	+	0	0	0	0	0	0	0	0	0	0	0	0	0	0	0	0	0	0
chr1	16314677	16314936	RP11-5P18.3	ENSG00000231353.1	+	0	0	0	0	0	0	0	0	0	0	0	0	0	0	0	0	0	0
chr1	16316366	16321246	TBC1D3P6	ENSG00000224966.4	+	0	0	0	0	0	0	0	0	0	0	0	0	0	0	0	0	0	0
chr1	16330731	16335302	C1orf64	ENSG00000183888.4	+	0	0	0.024692	0	0	0	0.34733	0.223221	0.149836	0.129924	0.184712	0.093714	1.04955	0.720506	0.927101	0.65563	0.553436	0.68416
chr1	16332655	16333166	RP11-5P18.5	ENSG00000233078.1	-	0	0	0	0	0	0	0	0	0	0	0	0	0	0	0	0	0	0
chr1	16340523	16346089	HSPB7	ENSG00000173641.13	-	0	0	0.048317	0	0	0	0.04328	0	0	0	0	0	0	0	0	0	0	0
chr1	16345370	16360545	CLCNKA	ENSG00000186510.7	+	0.682568	0.667492	0.410006	0.359634	0.336385	0.874242	1.26291	0.89584	0.799936	1.59782	1.07835	0.778705	1.79857	1.82994	1.70812	1.35095	0.92472	0.857284
chr1	16361673	16366524	RP11-5P18.10	ENSG00000232456.1	-	0.283683	0.289735	0.086488	0.876792	0.448169	0.630496	0.383142	0.493158	0.139111	0	0.331142	0.517069	0.268752	0.476194	1.24744	0.431547	0.310757	0.300924
chr1	16370272	16383803	CLCNKB	ENSG00000184908.13	+	1.17944	1.19818	1.80014	0.909227	2.06913	1.6952	4.60857	3.50125	3.814	4.01582	3.06617	3.13341	4.2874	4.58455	4.0141	4.04677	4.0831	3.79748
chr1	16384264	16400127	FAM131C	ENSG00000185519.8	-	1.291	0.94709	1.1618	1.10599	1.16879	1.37242	1.01396	0.912381	1.20783	1.25341	0.736034	1.0506	1.61518	1.61217	1.31742	1.21705	0.629245	1.19828
chr1	16450832	16482582	EPHA2	ENSG00000142627.9	-	20.9902	17.7783	15.3707	23.0652	23.6402	20.6734	59.5028	47.6225	52.818	45.931	41.6728	45.3723	50.5432	36.5447	40.5508	37.9447	30.415	31.3819
chr1	16481706	16483824	RP11-276H7.2	ENSG00000227959.1	+	0.112928	0	0.223056	0	0	0.064533	0.314573	0.181702	0.115433	0	0.070514	0	0	0.222505	0.242106	0	0	0
chr1	16485761	16488378	RP11-276H7.3	ENSG00000224621.1	+	0	0	0	0	0	0.076668	0.159327	0.054899	0	0.14714	0	0.32256	0	0	0	0.336854	0.11094	0
chr1	16524349	16524852	ARHGEF19-AS1	ENSG00000234166.1	+	0.00394	0	0	0	0	0	0	0	0	0	0	0	0	0	0	0	0	0
chr1	16524349	16539104	ARHGEF19	ENSG00000142632.12	-	32.0269	30.027	27.797	33.7485	33.8724	32.5526	15.4558	14.508	15.8626	13.7523	12.8915	13.5417	16.9036	14.7951	15.6508	20.9952	18.1549	20.1419
chr1	16542404	16554522	ANO7P1	ENSG00000237276.4	-	0.113213	0.644051	0.060571	0.168376	0.096604	0.1627	0.340716	0.646502	0.472508	0.393235	0.267646	0.552232	0.329913	0.337612	0.34074	0.336073	0.745284	0.391925
chr1	16555368	16556038	C1orf134	ENSG00000204377.3	-	1.55065	1.06676	1.29647	2.07202	1.34169	0.876764	2.08652	3.92278	2.67499	2.226	1.85628	2.44419	3.88972	4.0041	3.19274	3.5591	2.3014	3.42837
chr1	16558195	16563657	RSG1	ENSG00000132881.7	-	1.51701	1.66175	1.44491	1.64689	1.67133	1.34378	4.47997	3.82097	3.97403	4.73112	3.14321	3.3374	5.89211	6.53888	5.43562	4.87073	4.14254	4.08752
chr1	16567708	16567893	MT1XP1	ENSG00000233929.1	-	1.1358	1.43932	0.607521	0.479871	1.15467	0.667026	0	0.080283	0.352518	0.058999	0	0.455729	0.143453	0.056741	0.690493	0	0.04127	0.305519
chr1	16573334	16678949	FBXO42	ENSG00000037637.6	-	14.9761	15.8869	14.0537	16.9079	15.1185	15.9334	11.6692	10.3332	10.7743	10.7206	10.1368	10.7104	10.9892	10.5315	10.4934	11.5524	10.6953	10.6705
chr1	16679070	16724640	SZRD1	ENSG00000055070.12	+	76.6184	70.1021	59.7166	88.5101	79.2451	78.9017	99.2003	84.9307	93.8826	87.3852	88.4617	94.8431	103.404	84.2504	94.7339	98.7839	84.1454	98.5091
chr1	16695645	16696025	RP11-430L17.1	ENSG00000226457.1	-	0.082657	0.247314	0.093871	0.08419	0.214803	0.139954	0.048797	0.239079	0	0.165156	0	0.056205	0	0.104284	0.205243	0	0	0.296663
chr1	16713612	16763919	SPATA21	ENSG00000187144.7	-	0.079781	0.098557	0.054708	0.23425	0.055749	0.026933	0.201915	0.06177	0.11889	0.027608	0.025363	0.06674	0.107498	0.100995	0.091005	0.078679	0.095716	0.103066
chr1	16767167	16786573	NECAP2	ENSG00000157191.15	+	18.9731	17.063	18.1671	17.9623	20.7611	18.9451	47.5001	49.4344	39.2763	45.7576	39.6129	42.7733	46.3025	46.375	42.3368	50.687	55.7646	51.5669
chr1	16787443	16794976	RP4-798A10.2	ENSG00000226029.1	+	0.231999	0.160125	0.094302	0.083123	0.097584	0.110644	0.226944	0.029022	0.189019	0.036397	0.136412	0.124652	0.206414	0.06849	0.270036	0.136309	0.119415	0.291064
chr1	16793931	16825752	CROCCP3	ENSG00000080947.10	-	2.86025	2.31501	2.28574	3.70527	3.14403	3.45412	4.82699	3.42738	4.07847	3.97128	2.25339	4.83908	4.83884	3.21614	5.42128	5.30226	3.33539	5.36292
chr1	16840617	16840780	RNU1-1	ENSG00000206652.1	-	0.888595	1.09646	0.566191	0.14173	0.626721	0.291336	0.510406	0.322328	0.206141	0.563224	0.074592	1.15633	0.286609	0.143673	0.032676	0.957512	0.500299	0.324607
chr1	16841140	16842249	RP4-798A10.7	ENSG00000261135.1	+	2.45883	2.51518	1.76159	1.30944	2.15128	1.67131	1.61495	1.40363	2.06818	1.76148	1.68157	1.79248	2.76516	1.70159	2.55645	1.5571	1.91658	2.77595
chr1	16847189	16848291	RP4-798A10.4	ENSG00000224174.2	+	3.78385	3.8172	4.58603	5.57936	3.54257	6.0868	3.21272	2.80713	3.2436	3.92935	4.17314	3.44912	3.28647	4.13213	3.77226	2.48936	4.38642	2.71493
chr1	16860381	16862144	U1	ENSG00000233421.3	-	0.655268	0.660523	0.448726	0.266815	0.470384	0.531269	0.37777	0.763379	0.4451	0.801303	0.567529	0.542978	0.744843	0.519986	0.47767	1.5891	1.46048	0.781415
chr1	16865561	16866070	AL355149.2	ENSG00000268674.1	+	0	0.024182	0	0	0	0	0	0	0.014224	0.032698	0	0	0	0.046257	0	0.181492	0	0
chr1	16875146	16879026	RP5-875O13.6	ENSG00000225710.1	-	0.728092	0.886817	0.637619	0.506723	0.71049	0.325196	0	0.09223	0	0.123506	0.078273	0.16362	0.329023	0.218083	0	0.898064	0.348459	0.410884
chr1	16875409	16875482	AL355149.1	ENSG00000266584.1	+	0	0	0	0	0	0	0	0	0	0	0	0	0	0	0	0	0	0
chr1	16888814	16940057	NBPF1	ENSG00000219481.6	-	26.643	25.1107	22.7289	28.0937	25.7533	27.7323	32.0595	26.1837	28.5555	27.8911	22.6839	29.7531	36.1958	36.2955	36.6198	36.3677	32.1584	34.5519
chr1	16943886	16944224	RP5-1182A14.5	ENSG00000271732.1	+	0	0	0.019417	0	0	0.018688	0	0	0	0	0	0	0	0	0	0	0	0.162103
chr1	16944751	16971178	CROCCP2	ENSG00000215908.5	-	17.25	14.7909	13.6475	17.0127	18.6463	18.4107	19.7425	15.6122	18.9488	15.8933	14.7669	17.8697	26.909	18.8571	23.3119	26.0422	18.9558	26.9823
chr1	16972069	16976914	MST1P2	ENSG00000186301.7	+	3.62511	2.49059	2.02874	2.7759	3.40437	2.48239	5.12226	4.59471	4.34312	4.57926	2.73798	2.61566	8.62832	5.66632	7.34512	7.92171	7.33149	8.3756
chr1	16993280	16993443	RNU1-3	ENSG00000207513.1	-	0.211342	0.483046	0.639561	0.33109	0.164677	0.215689	0.263456	0.277455	0.329489	0.717608	0.140367	0.336552	0.079541	0.422974	0.144073	0.339156	0.204939	0.063476
chr1	16999498	17000007	AL137798.1	ENSG00000237847.2	+	0	0.011144	0.002589	0	0	0.073502	0	0	0.014501	0	0	0	0	0	0	0.043803	0	0
chr1	17007750	17007823	AL021920.1	ENSG00000264742.1	+	0	0	0	0	0	0	0	0	0	0	0	0	0	0	0	0	0	0
chr1	17012116	17012550	EIF1AXP1	ENSG00000236698.1	-	20.8556	22.1922	22.0591	23.7532	23.3301	25.8276	17.6075	18.08	16.7494	18.6571	18.9026	19.8271	18.5156	19.2861	16.5846	18.05	17.9671	16.1331
chr1	17013834	17046652	ESPNP	ENSG00000268869.1	-	9.01287	7.59001	5.70715	8.2273	6.18421	6.30725	1.92775	1.48223	1.99808	3.46392	3	2.73259	3.73785	2.85584	3.40337	8.4507	4.79859	6.89675
chr1	17060447	17060956	AL021920.2	ENSG00000268991.1	-	0	0.01114	0.002588	0	0	0.073498	0	0	0.014502	0	0	0	0	0	0	0.043803	0	0
chr1	17066768	17299474	CROCC	ENSG00000058453.12	+	20.3494	16.6908	13.7626	20.4789	19.9692	20.8874	15.2263	12.1852	13.6726	12.3869	9.01325	11.6491	22.5772	15.0262	22.0171	19.9866	14.987	19.8966
chr1	17067011	17067174	RNU1-4	ENSG00000207389.1	+	0.225425	0.483039	0.514691	0.331086	0.13723	0.177589	0.263454	0.349	0.462192	0.717605	0.140359	0.455022	0.261465	0.39227	0.144073	0.436617	0.229957	0.170093
chr1	17076728	17077459	CROCCP4	ENSG00000227684.1	+	0.701942	0.685887	0.446657	0.512582	0.360506	0.506212	0.508727	0.089319	0.069337	0.223597	0.10756	0.29986	0.417672	0.224616	0.287977	0.413363	0.290214	0.356451
chr1	17081405	17096732	MST1L	ENSG00000186715.6	-	3.40866	3.83342	2.52775	2.97823	3.67484	2.41999	5.5406	3.99538	5.26149	4.62276	2.12581	4.6096	9.64092	6.42049	7.26919	8.91366	6.30419	6.62246
chr1	17177752	17179624	RP11-108M9.1	ENSG00000223643.2	-	0	0.029265	0	0.037199	0	0	0.090849	0	0	0	0.016818	0	0	0	0	0	0	0
chr1	17181902	17185779	RP11-108M9.2	ENSG00000230239.1	+	0.103578	0.141291	0.313584	0.123343	0.298274	0.173487	0	0.021129	0.096383	0	0	0.005389	0.098136	0.058204	0.116408	0.067036	0.153659	0.314728
chr1	17185444	17185516	MIR3675	ENSG00000263811.1	-	0	0	0	0	0	0	0	0	0	0	0	0	0	0	0	0	0	0
chr1	17197440	17200587	U1	ENSG00000228549.2	+	0.552005	1.1636	0.751057	1.18581	0.99346	1.77977	0.766006	1.69199	0.690322	1.06945	1.16324	0.757633	1.07799	0.976927	3.54078	2.29671	2.9682	2.09237
chr1	17215033	17216144	RP11-108M9.4	ENSG00000238142.1	-	38.4708	37.4438	38.7835	38.8815	35.9106	34.2665	25.1948	26.8357	26.9858	32.252	24.8937	25.2504	34.2753	39.0565	39.098	26.7096	29.1062	32.7563
chr1	17215590	17216097	RP11-108M9.5	ENSG00000235241.1	+	3.08144	0	0	0	0	0	0	0	0	0	0	0	2.81971	3.24082	0	0	3.69538	0
chr1	17222475	17222638	RNU1-2	ENSG00000207005.1	+	0.234866	0.707792	0.351243	0.155208	0.074199	0.191004	0.689766	0.206132	0.233938	1.19094	0.281192	0.860581	0.536183	0.500365	0.032166	0.772664	0.66735	0.801855
chr1	17230834	17231271	RP11-108M9.6	ENSG00000272426.1	-	0.421218	0.086052	0.254988	0.087889	0.826673	0.168147	1.09764	0.343368	0.558033	1.25664	0.293284	0.34998	0.530544	0.249952	0.971849	0.871565	0.317275	0.266622
chr1	17300997	17307330	MFAP2	ENSG00000117122.9	-	125.287	117.48	99.7197	117.106	120.685	113.93	116.436	113.946	104.355	102.988	101.432	83.6386	154.196	136.163	150.537	164.4	142.256	145.032
chr1	17305421	17331586	RP1-37C10.3	ENSG00000226526.1	+	0	0	0	0	0	0	0	0	0	0	0	0	0	0	0	0	0	0
chr1	17312453	17338423	ATP13A2	ENSG00000159363.13	-	44.0185	39.5433	36.1987	40.4056	41.7471	38.2929	37.1015	33.2171	34.4131	31.109	26.3699	26.7714	40.7629	34.4004	40.6278	47.2391	40.3721	45.0411
chr1	17345217	17380665	SDHB	ENSG00000117118.5	-	78.0495	71.4249	71.5027	73.1481	77.1774	71.8891	61.9197	62.8049	64.0703	77.0123	68.1498	70.329	66.055	63.963	63.6313	67.6562	69.7126	65.1115
chr1	17393256	17445948	PADI2	ENSG00000117115.8	-	6.43821	5.60366	5.15108	6.31793	5.66195	5.70082	0.927335	0.945018	0.998932	0.977589	0.837011	0.855423	1.99738	2.03462	2.22862	1.5043	1.38475	1.43122
chr1	17484692	17484779	Y_RNA	ENSG00000252180.1	+	0	0	0	0	0	0	0	0	0	0	0	0	0	0	0	0	0	0
chr1	17516278	17524112	RP11-380J14.1	ENSG00000204362.5	+	0	0	0	0	0	0	0	0	0	0	0	0	0	0	0	0	0	0
chr1	17531621	17572500	PADI1	ENSG00000142623.8	+	0.27073	0.178546	0.283965	0.185298	0.271067	0.278844	0.101855	0.079723	0.119629	0.054884	0.119675	0.046912	0.185236	0.123485	0.190291	0.419265	0.123402	0.099532
chr1	17575593	17610728	PADI3	ENSG00000142619.4	+	0.426775	0.432695	0.584695	0.278663	0.634797	0.687122	1.28226	0.833359	1.04759	1.1069	1.18975	1.06639	1.8205	1.03073	1.40138	1.02716	1.39222	1.11098
chr1	17604384	17604470	MIR3972	ENSG00000266634.1	+	0	0	0	0	0.171034	0	0	0	0	0	0	0	0	0	0	0	0	0
chr1	17634690	17690499	PADI4	ENSG00000159339.9	+	0	0	0	0	0.138082	0	0	0	0	0.037776	0	0	0	0	0	0	0	0
chr1	17655507	17676070	AC004824.2	ENSG00000269468.1	-	0	0	0	0	0	0	0	0	0	0	0	0	0	0	0	0	0	0
chr1	17698691	17728195	PADI6	ENSG00000256049.2	+	0	0	0	0	0	0	0	0	0	0	0	0	0	0	0	0	0	0
chr1	17733256	17733878	RP1-20B21.4	ENSG00000227751.1	+	0.008527	0.002504	0.00686	0.01496	0.005898	0.009407	0.02903	0.02666	0.012749	0.019998	0.010162	0.010022	0.022505	0.012423	0.030222	0.0144	0.004797	0.012275
chr1	17733256	17766220	RCC2	ENSG00000179051.9	-	236.538	228.541	216.322	283.317	261.903	261.982	266.654	247.528	260.324	249.826	239.489	250.823	303.947	282.158	286.612	320.706	294.094	292.624
chr1	17740127	17740190	AC004824.1	ENSG00000266727.1	-	0.000226	0.00025	0.000185	0.000251	0.00022	0.000227	0.00025	0.000174	0.000225	0.000215	0.000201	0.000163	0.000228	0.000192	0.000289	0.000243	0.000233	0.000268
chr1	17776259	17776359	snoU13	ENSG00000239020.1	+	0	0	0	0	0	0	0	0	0	0	0	0.182363	0	0.206939	0.502852	0	0	0
chr1	17866330	18024369	ARHGEF10L	ENSG00000074964.12	+	22.524	21.6225	18.4846	21.9767	18.9396	20.5526	7.4686	5.97781	6.84619	8.89821	6.37554	5.95941	8.79691	6.64013	6.66403	10.8248	12.3569	11.5357
chr1	18044182	18076473	RP11-473A10.2	ENSG00000236648.1	+	0	0	0	0	0	0	0	0	0	0	0	0	0	0	0	0	0	0
chr1	18081808	18153558	ACTL8	ENSG00000117148.6	+	1.77697	1.18897	1.22076	1.59441	1.60758	1.18014	0.155059	0.662437	0.285161	0.369064	0.495689	0.226678	0.1336	0.395196	0.394832	0.07633	0.349754	0.230861
chr1	18392151	18400906	RP11-174G17.2	ENSG00000261781.1	+	0	0	0	0	0	0	0	0	0	0	0	0	0	0	0	0	0	0
chr1	18434240	18704977	IGSF21	ENSG00000117154.7	+	23.579	22.3154	21.2835	20.8109	22.5757	21.9142	8.35624	5.94446	7.32668	11.4019	11.2783	13.4897	1.47341	0.984692	1.24165	0.616264	1.37608	1.08406
chr1	18493423	18505840	RP11-174G17	ENSG00000230035.2	-	0	0	0	0	0	0	0	0	0	0	0	0	0	0	0	0	0	0
chr1	18712323	18715008	RP11-422P22.1	ENSG00000225387.1	+	0.651009	0.49388	0.573787	0	0.22224	0.417732	0.401048	0	0.113651	0.267321	0.098727	0	0	0	0	0.217936	0	0.68615
chr1	18807424	18812478	KLHDC7A	ENSG00000179023.7	+	14.1281	13.0328	12.5712	17.8337	15.6916	15.3266	4.98824	4.46401	5.07772	4.9309	4.03104	4.059	8.31409	8.52837	7.59149	6.47092	6.08041	6.4153
chr1	18839612	18839881	RP1-8B22.1	ENSG00000235282.2	+	0	0	0	0	0	0	0	0	0	0	0	0.030808	0	0	0	0	0	0
chr1	18921908	18922130	RP1-8B22.2	ENSG00000225478.2	+	0	0	0	0	0	0	0	0	0	0	0	0	0	0	0	0	0	0
chr1	18957500	19075360	PAX7	ENSG00000009709.7	+	0.053666	0	0.015808	0.028154	0.037716	0.042232	0.40796	0.486237	0.535196	0.336997	0.338481	0.264555	0.350761	0.544903	0.748557	0.125401	0.11192	0.177992
chr1	19166093	19186176	TAS1R2	ENSG00000179002.5	-	0	0	0	0	0	0	0	0	0	0	0	0	0	0	0	0	0	0
chr1	19175767	19247615	RP13-279N23.2	ENSG00000255275.3	-	0	0.033896	0.094124	0.141346	0	0	0	0	0	0	0	0	0	0	0	0.021633	0	0
chr1	19197926	19229275	ALDH4A1	ENSG00000159423.12	-	23.5214	22.9185	20.8043	21.1206	21.5024	21.6313	20.9622	18.4616	18.3458	19.2725	18.2459	17.0879	14.1932	13.1337	13.1002	13.8753	13.3964	12.7384
chr1	19209696	19209769	MIR4695	ENSG00000265606.1	-	0	0	0.219416	0	0	0	0	0	0	0	0	0	0	0	0	0	0	0
chr1	19223565	19223642	MIR1290	ENSG00000221662.1	-	0	0	0	0	0	0	0.523709	0	0	0	0	0	0.214578	0	0	0	0	0.276206
chr1	19230775	19283180	IFFO2	ENSG00000169991.6	-	5.69209	4.98861	4.42162	6.44578	5.79579	6.43012	3.64204	3.67989	4.05265	3.28441	3.1636	3.42749	4.41574	3.5311	4.26962	5.03966	5.08932	5.92549
chr1	19398604	19402005	RP5-1126H10.2	ENSG00000272084.1	-	0.258754	0.202101	0.156488	0.16711	0.430252	0.277715	0.606702	0.191015	0.168257	0.239026	0.177878	0.386458	0.141017	0.10418	0.125337	0.178783	0.109433	0.20992
chr1	19401000	19536770	UBR4	ENSG00000127481.10	-	91.4438	81.5415	76.1151	95.3826	86.9098	91.1931	59.2094	52.8874	57.4725	57.7756	46.4383	57.3754	59.2557	52.7135	54.8668	73.1294	67.5561	76.0414
chr1	19410046	19410145	AL137127.1	ENSG00000266098.1	-	0.713822	0.84804	0.945681	1.2189	1.12702	2.61068	1.6235	0.341317	0.837042	1.4395	1.15128	1.61015	0.749529	0.591844	4.359	1.46599	2.03553	4.73346
chr1	19536995	19567198	RP1-43E13.2	ENSG00000230424.1	+	0.417797	0.470389	0.685743	0.509092	1.15262	0	0.675056	0.790074	0.786076	0.69634	0.854379	0.881703	1.92582	1.8504	0.901769	1.1693	0.976817	0.879834
chr1	19542158	19578046	EMC1	ENSG00000127463.9	-	32.7239	31.9832	30.9902	36.408	32.9483	33.2937	32.9885	33.7268	34.4477	32.8366	31.9726	31.6954	45.3945	44.3857	46.5803	45.9912	44.8182	47.3037
chr1	19578033	19586622	MRTO4	ENSG00000053372.4	+	36.9325	34.5038	35.9951	43.6624	38.8296	39.1337	33.0181	33.7601	37.3415	33.1196	37.0613	34.7797	41.3676	39.9978	39.9873	34.197	36.0144	29.9943
chr1	19592476	19600688	AKR7L	ENSG00000211454.9	-	0.463768	0.403901	0.260809	0.7767	0.343354	0.621782	0.417978	0.765591	0.698294	0.783145	0.733016	0.862426	0.789351	0.582348	0.390577	1.85105	1.04801	1.036
chr1	19609052	19615744	AKR7A3	ENSG00000162482.4	-	0.994694	0.467379	0.718746	0.72912	0.834053	0.87013	0.945126	0.823831	1.00257	1.00091	0.558548	0.922401	2.00171	0.718678	1.45679	1.52197	1.02687	1.02109
chr1	19623574	19624397	RP4-657E11.10	ENSG00000270728.1	+	0	0	0	0	0	0	0	0	0	0	0	0	0	0	0	0	0	0
chr1	19630459	19638640	AKR7A2	ENSG00000053371.8	-	27.7642	32.0905	29.6503	27.2138	26.5322	27.6378	37.2982	36.9986	34.1012	31.0307	34.0894	27.0435	48.7898	52.3799	47.9329	42.4437	46.1449	42.5699
chr1	19631570	19631676	RNU6-1099P	ENSG00000200403.1	-	0	0.106193	0.621336	0.706437	0.440374	0.621691	1.02295	0.89516	1.35335	1.33326	0.430385	2.14339	0.446594	1.0463	0	0.800048	2.08542	1.24893
chr1	19638820	19655794	PQLC2	ENSG00000040487.8	+	8.50549	7.58163	6.53699	9.52953	8.24409	8.07751	10.7652	9.46664	10.3231	10.2948	9.89698	8.80121	18.4469	15.2536	14.8993	15.9515	14.2363	11.7082
chr1	19646299	19646554	RN7SL85P	ENSG00000265192.1	-	0	0	0	0	0	0	0	0	0	0	0	0	0	0	0	0	0	0
chr1	19665267	19812066	CAPZB	ENSG00000077549.13	-	318.413	307.54	307.921	310.376	291.134	304.167	256.407	247.512	250.349	256.787	247.748	247.552	273.596	252.084	254.957	281.171	277.405	284.355
chr1	19750878	19751163	RN7SL277P	ENSG00000240490.2	+	0	0	0	0	0	0	0	0	0	0	0	0	0	0	0	0	0	0
chr1	19837087	19837227	RNU4-28P	ENSG00000201609.1	+	0	0	0	0	0	0	0	0	0	0	0	0	0	0	0	0	0	0
chr1	19858664	19858768	snoU13	ENSG00000239027.1	-	0	0	0	0	0	0	0	0	0	0	0	0	0	0	0	0	0	0
chr1	19918296	19923326	RP5-1056L3.1	ENSG00000235185.1	-	0	0	0	0	0	0	0	0	0	0	0	0	0	0	0	0	0	0
chr1	19923473	19984549	MINOS1-NBL1	ENSG00000270136.1	+	0	0	0	1.55062	0	0	15.4085	0	0	0	9.78316	0	0	5.08111	0	0	5.79754	0
chr1	19923477	19956314	MINOS1	ENSG00000173436.9	+	40.7632	82.149	81.7898	82.6472	91.1415	86.6483	55.6088	80.0778	73.564	64.2372	77.904	76.5558	75.6143	67.8728	52.1438	57.08	61.4255	40.5171
chr1	19934608	19935062	RPS14P3	ENSG00000226396.1	+	3.53931	2.64346	2.61723	2.12336	2.80007	3.1475	1.82306	2.04568	1.90036	1.49407	2.37172	1.70802	1.73315	2.01981	2.0444	2.16694	1.88769	2.01991
chr1	19967048	19984945	NBL1	ENSG00000158747.9	+	6.33778	5.29194	4.73595	6.19797	6.90661	6.60653	14.4792	23.4506	20.3307	19.6362	10.0737	14.9017	13.895	9.48147	12.4303	14.9245	9.10659	15.6107
chr1	19991780	20006055	HTR6	ENSG00000158748.3	+	0.42262	0.536534	0.36031	0.782087	0.757777	0.53606	0.086581	0.019784	0.161586	0	0	0.016271	0.127518	0.189937	0.13665	0.218975	0.123277	0.086871
chr1	20008706	20126438	TMCO4	ENSG00000162542.9	-	2.91443	2.88029	3.10967	3.58365	4.90115	3.13286	5.72072	5.29063	6.25739	5.59139	6.54708	6.12029	4.86537	5.06532	4.52635	3.32256	2.70673	4.75635
chr1	20140523	20141771	RNF186	ENSG00000178828.5	-	0	0.00355	0	0	0	0	0	0	0	0	0	0.03647	0	0	0	0	0	0
chr1	20140860	20145995	RP11-91K11.2	ENSG00000235434.1	+	0	0	0	0	0	0	0	0	0	0	0	0	0	0	0	0	0	0
chr1	20209006	20239438	OTUD3	ENSG00000169914.5	+	12.8946	10.8252	9.36469	13.6299	10.4243	12.8117	10.8985	10.5708	11.8967	9.90092	9.40301	12.7628	14.1907	11.7624	12.9406	15.3017	11.7909	15.591
chr1	20246502	20250110	PLA2G2E	ENSG00000188784.4	-	0	0	0	0	0	0	0	0	0	0	0	0	0	0	0	0	0	0
chr1	20297462	20297760	RN7SL304P	ENSG00000242688.2	+	0	0	0	0	0	0	0	0	0	0	0	0	0	0	0	0	0	0
chr1	20301925	20306932	PLA2G2A	ENSG00000188257.6	-	5.23241	9.10146	6.17774	3.9709	4.0262	4.16834	0.847401	0.296233	0.580604	0.304568	0.393441	0.277659	2.1346	1.76414	2.40519	2.90854	3.11818	4.24261
chr1	20354672	20417683	PLA2G5	ENSG00000127472.6	+	0	0	0	0	0	0	0.168925	0.060314	0.051896	0.098328	0.051688	0.059913	0.095808	0	0	0	0	0
chr1	20438432	20446050	PLA2G2D	ENSG00000117215.10	-	0	0	0	0	0	0	0	0	0	0	0	0	0	0	0	0	0	0
chr1	20465819	20476879	PLA2G2F	ENSG00000158786.4	+	0	0	0	0	0	0	0	0	0	0	0	0	0	0	0	0	0	0
chr1	20480831	20487061	RP3-340N1.2	ENSG00000227066.1	+	0	0	0	0	0	0	0	0	0	0	0	0	0	0	0	0	0	0
chr1	20487746	20503917	PLA2G2C	ENSG00000187980.6	-	0	0	0	0.025411	0.027988	0	0	0.070188	0	0	0	0	0	0	0	0.070317	0	0
chr1	20510735	20512979	RP3-340N1.5	ENSG00000225986.1	-	0.174956	0	0.074859	0.559491	0	0.103001	1.15319	0.297398	0.328252	0.489411	0.639203	0.820939	0.592622	0.201258	0	0.257025	0.365906	0.193462
chr1	20512578	20522541	UBXN10	ENSG00000162543.5	+	0.346097	0.393046	0.531623	0.335051	0.293065	0.272501	2.48548	2.66346	2.23988	2.23696	2.07434	2.25062	2.70162	3.07551	2.90194	2.23103	2.32764	2.21539
chr1	20569588	20571148	RP3-340N1.6	ENSG00000228105.1	+	0	0	0	0	0	0	0	0	0	0	0	0	0	0	0	0	0	0
chr1	20617412	20681387	VWA5B1	ENSG00000158816.11	+	0.84033	0.571961	0.815328	1.01266	0.680836	0.808241	0.066044	0	0.060092	0.059702	0.010914	0.04797	0.066518	0	0	0.157577	0	0.010729
chr1	20620704	20649680	RP4-745E8.2	ENSG00000226664.1	-	0	0	0	0	0	0	0	0	0	0	0	0	0	0	0	0	0	0
chr1	20687072	20757727	RP4-749H3.1	ENSG00000236963.1	-	0	0	0	0	0	0	0	0	0	0.045579	0	0	0	0	0	0	0.051295	0
chr1	20738797	20739746	RP4-749H3.2	ENSG00000226487.1	-	0	0	0	0	0	0	0	0	0	0	0	0	0	0	0	0	0	0
chr1	20808884	20812713	CAMK2N1	ENSG00000162545.5	-	6.45792	5.36111	4.15355	4.72564	4.3778	3.83827	5.69905	4.52192	5.47991	5.62572	5.45653	6.23004	14.508	12.4979	15.3375	30.9985	28.8709	34.3401
chr1	20825943	20834654	MUL1	ENSG00000090432.5	-	12.2637	14.1994	13.5005	13.3901	14.0024	13.3359	16.7391	15.3171	15.2245	14.4867	14.8002	13.6261	20.3304	17.7316	16.8827	16.8679	18.9366	15.1399
chr1	20852482	20853244	RPS4XP4	ENSG00000215520.3	+	0	0	0	0	0	0	0	0	0	0	0	0	0.253057	0	0	0	0	0
chr1	20878932	20881512	FAM43B	ENSG00000183114.6	+	3.23595	2.25962	2.2064	2.53713	2.79281	3.42478	0.691921	0.485246	0.308202	0.657354	0.184903	0.569904	0.225555	0.196195	0	0.645417	0.225727	0.368486
chr1	20915441	20945401	CDA	ENSG00000158825.5	+	9.09282	10.34	7.14156	10.0648	8.91388	10.5434	172.895	171.128	168.373	178.835	152.181	144.13	34.4092	25.4758	28.2581	49.0457	48.606	45.5653
chr1	20959948	20978004	PINK1	ENSG00000158828.5	+	16.4051	15.4345	14.286	16.7856	16.8853	15.6826	82.5692	82.0817	82.7419	80.5126	81.7431	75.1905	40.732	37.5936	39.1669	62.2112	57.0973	55.8638
chr1	20969150	20978686	PINK1-AS	ENSG00000117242.7	-	3.19825	2.80925	3.28228	3.73998	2.20969	3.46424	5.28636	4.37085	4.15841	4.25305	3.82217	3.48527	5.95376	5.03049	5.46141	5.05105	3.99801	4.97969
chr1	20976856	20977207	AL391357.1	ENSG00000257033.1	-	0.004951	0.005414	0.026935	0.059974	0.016617	0.005176	0.036202	0.00391	0.01387	0.007397	0.006355	0.007848	0.022665	0.064505	0.006553	0.11665	0.01124	0.011446
chr1	20978270	20988000	DDOST	ENSG00000244038.5	-	227.597	232.381	215.121	233.644	219.649	222.278	239.851	247.184	231.793	224.656	222.982	200.363	282.237	273.422	269.684	278.046	271.281	266.437
chr1	20990507	21044510	KIF17	ENSG00000117245.8	-	9.47444	9.18891	7.47025	6.76821	8.20053	7.61148	4.98649	4.64293	4.4271	5.15228	3.44772	4.21301	6.68734	6.21693	6.59255	5.6248	6.0177	6.30621
chr1	21019227	21020506	RP5-930J4.5	ENSG00000235432.1	-	0.046022	0.057279	0.212086	0	0.079388	0.018186	0.073254	0	0	0.00539	0	0.171175	0.072922	0.030242	0.315037	0.035743	0	0.15905
chr1	21046225	21059330	SH2D5	ENSG00000189410.7	-	13.1463	10.0939	9.72777	14.4558	15.0917	12.7293	4.40914	4.44234	4.69233	3.54095	3.24405	3.47206	2.74759	2.56156	3.04895	2.91495	1.88375	2.01642
chr1	21059373	21060445	RP5-930J4.2	ENSG00000233069.1	+	0	0	0	0	0	0	0	0	0	0	0	0	0	0	0	0	0	0
chr1	21069154	21113816	HP1BP3	ENSG00000127483.13	-	79.3397	70.6865	68.5365	88.6983	85.6007	85.0447	130.758	99.7264	114.339	107.294	81.6715	133.314	141.129	122.78	143.376	137.528	112.147	149.588
chr1	21069480	21070455	RP5-930J4.4	ENSG00000203394.2	+	0.006387	0.001627	0	0.00159	0	0	0.01231	0.008551	0	0.003016	0.008015	0	0.005327	0	0.019507	0.004333	0.002196	0.001726
chr1	21132963	21503377	EIF4G3	ENSG00000075151.15	-	61.2354	57.9217	55.7681	65.1058	62.6294	65.9855	83.8138	83.0787	81.7914	82.2829	83.9581	89.212	91.0212	93.0293	91.2911	110.28	104.737	114.342
chr1	21167734	21167795	RNU7-200P	ENSG00000251914.1	+	0	0	0	0	0	0	0	0	0	0	0	0	0	0	0	0	0	0
chr1	21314807	21314925	MIR1256	ENSG00000221808.1	-	0	0	0	0	0.027796	0	0	0	0.703396	0	0	0	0	0	0	0	0.175724	0
chr1	21330043	21330427	RPS15AP6	ENSG00000233072.1	-	0.382391	0.26274	0	0	0.207561	0.123415	0.114944	0.055409	0.248576	0.321361	0	0.170272	0.15562	0.0301	0.221127	0.194557	0.12513	0.343051
chr1	21400132	21400246	RP11-487E1.2	ENSG00000236073.2	-	0	0	0.026711	0	0.436105	0	0	0.211468	0	0	0	0	0.059059	0	0	0	0.42812	0
chr1	21487968	21488574	RP11-628K18.1	ENSG00000235112.1	+	0	0	0	0	0	0	0	0	0	0	0	0	0	0	0	0	0	0
chr1	21503059	21503122	AL031005.1	ENSG00000266867.1	-	0.118916	0	0	0	0	0.911529	0	0	0	0	0	0	0.981634	0.038801	0.234073	0.271696	0.024815	0.004879
chr1	21543740	21671997	ECE1	ENSG00000117298.10	-	26.6216	23.7033	20.7815	27.2426	26.6523	27.678	37.1578	35.5213	35.7246	32.8233	29.1865	30.1124	51.9971	45.2199	51.8852	45.0286	39.1509	46.2644
chr1	21592575	21593744	RP3-329E20.2	ENSG00000236936.1	+	0	0	0	0	0	0	0	0	0	0	0	0	0	0	0	0	0	0
chr1	21619783	21626267	RP5-1071N3.1	ENSG00000231105.1	+	0.096045	0.290217	0.12955	0.102875	0	0.236775	0.266925	0.349974	0.333299	0.447673	0.282265	0.274986	0.452795	0.24851	0.237896	0.294523	0.312	0.50372
chr1	21724480	21724855	PPP1R11P1	ENSG00000236216.4	+	0	0	0	0	0	0	0	0	0	0.326191	0	0	0.127734	0	0	0	0	0
chr1	21737953	21739786	RP11-293F5.8	ENSG00000228823.1	-	0	0	0	0	0	0	0	0	0	0	0	0	0	0	0	0	0	0
chr1	21742391	21743985	RP11-293F5.1	ENSG00000236009.1	+	0	0	0	0	0	0	0	0	0	0	0	0	0	0	0	0	0	0
chr1	21751118	21754460	NBPF2P	ENSG00000227001.2	-	6.09718	5.70908	3.41655	6.10141	5.5222	5.07675	5.74123	4.99777	5.5094	4.87603	5.65828	5.07205	5.36881	7.01315	5.52827	7.06838	7.09029	5.83685
chr1	21754796	21756030	HS6ST1P1	ENSG00000187952.8	+	4.82884	3.34642	2.71337	3.39677	4.21744	4.19494	9.20706	8.42813	7.49233	5.40306	5.12136	5.01958	8.56464	7.00098	7.01432	7.56111	7.23627	5.74222
chr1	21760811	21764051	CROCCP5	ENSG00000186543.7	+	0.161255	0	0.215979	0	0.116862	0	0	0.102807	0	0	0	0	0.199021	0	0	0	0	0.272358
chr1	21766621	21811498	NBPF3	ENSG00000142794.14	+	14.7028	14.1325	12.6495	14.0679	13.2739	17.2469	15.1728	14.9228	13.7844	14.618	13.8004	14.9716	18.4944	19.7878	18.4748	18.5066	18.9631	18.392
chr1	21786249	21786575	PFN1P10	ENSG00000176378.8	-	0	0	0	0	0	0	0	0	0	0	0	0	0	0	0	0	0.072964	0
chr1	21835858	21904905	ALPL	ENSG00000162551.9	+	198.097	195.088	179.876	195.932	197.508	186.334	86.6231	86.0015	85.8104	88.1372	80.6451	81.1901	181.54	176.138	189.563	317.552	302.53	325.217
chr1	21912965	21917680	RP11-63N8.3	ENSG00000233431.1	+	0	0	0	0	0	0	0	0	0	0	0	0	0.039591	0	0	0	0	0
chr1	21918904	21919041	AL359815.1	ENSG00000221781.1	-	0	0	0	0	0	0	0	0	0	0	0	0	0	0	0	0	0	0
chr1	21922708	21995801	RAP1GAP	ENSG00000076864.15	-	11.0574	9.68703	9.43671	12.1523	9.59978	10.6787	12.7659	10.3605	11.3039	10.4633	8.81781	10.5078	7.67281	7.1067	7.44244	10.5366	9.05138	12.785
chr1	22004791	22110099	USP48	ENSG00000090686.11	-	71.1698	69.6597	80.3019	78.99	77.4268	87.5865	50.9489	56.8707	56.5889	62.2888	57.7753	63.6757	57.8584	50.6728	49.8954	67.323	65.5587	73.7924
chr1	22094762	22095068	RP11-132G19.3	ENSG00000231978.2	+	0	0	0	0	0	0	0	0	0	0	0	0	0	0	0	0	0	0
chr1	22138758	22151714	LDLRAD2	ENSG00000187942.7	+	0.526906	0.328508	0.268038	0.50555	0.727091	0.630839	0.682402	0.670402	0.667732	0.56434	0.229761	0.463375	0.274208	0.337413	0.371385	0.522244	0.366111	0.476301
chr1	22148738	22263790	HSPG2	ENSG00000142798.12	-	32.5853	28.2943	22.5818	32.4964	29.8995	31.2803	32.5467	20.7878	27.6394	22.8011	16.2992	24.8917	58.0254	36.0018	60.1953	125.508	77.4708	136.971
chr1	22234591	22235073	RP11-26H16.1	ENSG00000232037.2	+	0.019351	0.508785	0.007268	0.06504	0.059379	0.011866	0.066125	0.052792	0.2149	0.142815	0.00368	0.092952	0.030627	0.029682	0.03091	0.126835	0.057218	0.022392
chr1	22303514	22325135	CELA3B	ENSG00000219073.3	+	0	0	0	0	0	0	0	0	0	0	0	0	0	0	0	0.558996	0.581628	0.323049
chr1	22305444	22305729	RN7SL421P	ENSG00000264385.1	-	0	0	0	0	0	0	0	0	0	0	0	0	0	0	0	0	0	0
chr1	22313974	22314268	RN7SL386P	ENSG00000263991.1	+	0	0	0	0	0	0	0	0	0	0	0	0	0	0	0	0	0	0.201099
chr1	22314309	22314412	RNU6-1022P	ENSG00000201919.1	+	0	0	0	0	0	0	0	0	0	0	0	0	0	0	0	0	0	0.312233
chr1	22328149	22339032	CELA3A	ENSG00000142789.15	+	0	0	0	0	0	0	0	0	0	0	0	0	0	0	0	0.238714	0	0.301849
chr1	22330078	22330361	RN7SL768P	ENSG00000263582.1	-	0	0	0	0	0	0	0	0	0	0	0	0	0	0	0	0	0	0
chr1	22337143	22337437	RN7SL186P	ENSG00000263929.1	+	0	0	0	0	0	0	0	0	0	0	0	0	0	0	0	0	0.12203	0
chr1	22337478	22337581	RNU6-776P	ENSG00000201273.1	+	0	0	0	0	0	0	0	0	0	0	0	0	0	0	0	0	0	0
chr1	22350487	22351461	RP1-224A6.3	ENSG00000228397.1	-	0	0	0	0	0	0	0.255468	0	0.197351	0.178085	0	0.084373	0	0	0	0	0	0
chr1	22351681	22357716	LINC00339	ENSG00000218510.3	+	32.8493	32.6991	31.0857	33.0999	33.6724	32.2642	28.8114	23.4521	26.6289	28.0755	25.0024	28.0722	38.0582	33.3761	31.8943	36.1243	33.7783	39.371
chr1	22379120	22419437	CDC42	ENSG00000070831.11	+	211.929	225.249	225.019	221.833	212.053	217.145	314.438	336.345	311.332	333.903	337.747	339.965	307.736	335.899	308.233	347.632	368.741	347.652
chr1	22385690	22390692	CDC42-IT1	ENSG00000230068.2	+	0.230578	0.006408	0.226074	0	0	0.043487	0.206986	0.046549	0.388684	0.551611	0.192989	0.315965	0.040661	0.191986	0.135434	0.379625	0.244807	0.286966
chr1	22394833	22395320	RP1-224A6.8	ENSG00000271428.1	-	0	0	0	0	0	0	0	0	0	0	0	0	0	0	0	0	0	0
chr1	22427106	22427853	RP1-224A6.9	ENSG00000271840.1	+	0	0.018155	0	0.170786	0.044575	0	0.219846	0.057038	0.083555	0.046601	0.064482	0.120472	0.192302	0.127262	0.088903	0.107293	0.313533	0.227079
chr1	22443798	22470462	WNT4	ENSG00000162552.10	-	0.377169	0.162967	0.24243	0.434341	1.06729	0.375259	3.48992	2.91374	1.85735	1.42834	1.30546	1.64925	0.603418	0.222654	0.539938	0.648732	0.450195	0.741385
chr1	22592732	22592793	MIR4418	ENSG00000266564.1	+	0	0	0	0	0	0	0	0	0	0	0	0	0	0	0	0	0	0
chr1	22649333	22649824	RP11-415K20.1	ENSG00000234397.3	-	0.024062	0.031769	0.094902	0.050796	0.116047	0.732147	0.092341	0.104995	0.02183	0.059235	0.704498	0.183935	0.211352	0.079093	0.161171	0.035234	0.049443	0.453119
chr1	22778344	22857650	ZBTB40	ENSG00000184677.12	+	8.87205	7.60668	6.87167	9.96903	8.43937	8.57408	21.1541	17.9487	19.0094	18.8981	16.4061	21.1824	13.3837	11.2262	11.7398	16.1225	13.0207	14.149
chr1	22843967	22846201	ZBTB40-IT1	ENSG00000237200.1	+	1.54288	0.741063	0.452494	0.71928	0.484493	0.321021	1.17307	1.17445	1.26016	0.641575	1.48621	1.11793	0.429155	1.09837	0.732102	1.34542	2.06329	2.20279
chr1	22890057	22930087	EPHA8	ENSG00000070886.6	+	5.2008	4.21397	4.16851	4.46336	4.95877	4.88315	3.32056	2.85335	2.54405	2.4043	2.8668	2.39619	1.5356	1.64654	0.701566	1.7428	1.94199	0.842977
chr1	22962999	22966101	C1QA	ENSG00000173372.12	+	0	0	0	0	0	0	0	0	0	0	0	0	0	0	0	0	0	0
chr1	22970123	22974603	C1QC	ENSG00000159189.7	+	0	0	0	0	0	0	0	0	0	0	0	0	0	0	0	0	0	0
chr1	22979255	22988031	C1QB	ENSG00000173369.11	+	0	0	0	0	0	0	0	0	0	0	0	0	0	0	0	0	0	0
chr1	23037332	23241818	EPHB2	ENSG00000133216.12	+	8.69707	7.11256	7.51575	13.1935	10.7597	9.94408	16.6027	15.2756	14.7846	13.2475	13.6315	13.0986	33.7054	33.7271	35.7019	15.2524	12.7729	13.2147
chr1	23046010	23046091	MIR4684	ENSG00000265422.1	+	0	0	0	0	0	0	0	0	0	0	0	0	0	0.020189	0	0	0	0
chr1	23075310	23075404	AL611946.1	ENSG00000216157.2	-	0	0	0	0	0	0	0	0	0	0	0	0	0	0	0	0	0	0
chr1	23162206	23163342	RP11-69E9.1	ENSG00000225952.1	-	0	0	0	0	0	0	0	0	0	0	0	0	0	0	0	0	0	0
chr1	23189652	23189719	MIR4253	ENSG00000264014.1	-	0	0	0	0	0	0	0	0	0	0	0	0	0	0	0	0	0	0
chr1	23243175	23247993	RP1-74M1.3	ENSG00000272796.1	+	0.285416	0.293585	0.211402	0.284308	0.303231	0.233242	1.19076	1.00615	1.00055	1.22499	0.784863	0.841396	1.8083	1.13921	1.30208	0.369771	0.097442	0.285928
chr1	23279536	23291831	LACTBL1	ENSG00000215906.4	-	0	0	0	0	0	0	0	0	0	0	0	0	0	0	0	0.024942	0	0
chr1	23337327	23342343	C1orf234	ENSG00000227868.2	-	0.147458	0	0	0	0	0	0.195491	0.142495	0	0	0	0.380956	0.198723	0	0	0.517688	0.103487	0.044692
chr1	23345941	23410182	KDM1A	ENSG00000004487.11	+	271.516	269.008	261.346	288.423	280.966	279.4	201.791	195.854	214.29	201.883	202.326	218.506	214.251	210.562	203.967	212.941	208.002	205.693
chr1	23346640	23414551	RP1-184J9.2	ENSG00000240553.1	-	0	0	0	0	0	0	0	0	0	0	0	0	0	0	0	0	0	0
chr1	23370798	23370865	MIR3115	ENSG00000263793.1	+	0.181388	0	0	0	0	0	0.200242	0	0	0.534765	0	0	0	0	0	0	0	0
chr1	23384351	23384427	MIR4419A	ENSG00000266802.1	-	0	0	0	0	0	0	0	0	0	0	0	0	0	0	0	0	0	0
chr1	23410516	23504301	LUZP1	ENSG00000169641.9	-	30.8973	27.9168	29.5074	30.9944	30.5529	30.5709	31.3873	34.2973	33.2516	37.4274	34.95	31.0022	34.8151	36.8456	34.5499	33.5126	33.159	32.4523
chr1	23466818	23467635	RP5-979D14.1	ENSG00000229010.1	+	0	0	0	0	0	0	0	0	0	0	0	0	0	0	0	0	0	0
chr1	23489197	23489303	RNU6-514P	ENSG00000206935.1	+	0	0	0	0	0	0	0	0	0	0	0	0	0	0	0	0	0	0
chr1	23490446	23490546	RNU6-135P	ENSG00000252578.1	+	0	0	0	0	0	0	0	0	0	0	0	0	0	0	0	0	0	0
chr1	23516993	23521222	HTR1D	ENSG00000179546.3	-	7.67727	6.02509	6.25849	4.65358	4.65975	3.5051	0.601665	1.42652	1.05277	0.849606	0.656335	0.900414	2.74326	2.44852	2.67354	1.95225	2.97881	2.09995
chr1	23571258	23571717	RP5-1057J7.1	ENSG00000215381.3	+	0.114102	0.028316	0.003434	0	0	0.046482	0	0	0.005762	0.023232	0	0	0	0	0.099553	0	0	0
chr1	23607802	23613245	RP5-1057J7.6	ENSG00000261326.2	-	2.20081	1.43715	1.43797	2.64298	1.78655	2.65243	2.49426	1.9616	2.4146	2.14464	1.40207	3.27951	4.47192	2.83362	3.24803	3.68569	2.91712	4.23201
chr1	23630264	23670829	HNRNPR	ENSG00000125944.14	-	144.218	152.823	154.377	173.364	182.238	166.34	183.465	166.836	228.351	183.24	178.945	232.092	188.751	180.944	190.664	168.541	163.211	145.625
chr1	23685941	23695935	ZNF436	ENSG00000125945.10	-	1.36454	1.27304	1.21152	1.46804	1.20732	1.82585	7.02615	8.76743	8.67024	7.57874	8.36931	7.493	9.66637	10.1912	10.9334	10.8459	11.9513	11.7518
chr1	23695490	23698332	C1orf213	ENSG00000249087.3	+	1.10634	0.996821	0.816117	0.617295	0.984899	0.77614	3.3799	4.33005	3.51902	5.49996	4.08158	5.1582	12.3378	10.3352	11.7337	12.3121	9.18716	12.1845
chr1	23696747	23696839	Y_RNA	ENSG00000201405.1	+	2.9e-05	0.073278	0.059826	0.05235	0.007383	0.004202	0.070063	0.005625	0.008947	0.040671	0.002133	0.003024	0.010945	0.031561	0.011837	0.163205	0.048662	0.007742
chr1	23704873	23705522	RP5-1057J7.7	ENSG00000271420.1	-	0	0	0	0	0	0	0	0.008861	0	0	0	0	0.04814	0	0.427216	0.074081	0.010995	0
chr1	23707554	23751233	TCEA3	ENSG00000204219.5	-	0.123895	0.176699	0.264976	0	0.101102	0.089644	0.390683	0.795648	0.585947	0.511228	0.723561	0.304253	6.06487	7.11137	7.45725	7.68664	5.00016	8.28698
chr1	23737325	23738639	RP4-654C18.1	ENSG00000232482.2	+	0	0	0	0	0	0	0	0	0	0	0	0	0	0	0	0	0	0
chr1	23755056	23811061	ASAP3	ENSG00000088280.14	-	30.6321	28.5275	27.8743	32.1918	31.3345	31.8994	50.6544	41.1162	38.9916	38.886	38.1469	38.5807	43.8186	44.2724	44.2278	56.919	54.0666	55.8956
chr1	23832922	23857712	E2F2	ENSG00000007968.6	-	2.47701	1.90762	2.06209	2.73538	2.60059	2.84854	3.07121	2.15916	2.95899	1.90706	2.16818	2.19802	3.96433	3.33508	3.64404	2.45677	2.05592	2.07804
chr1	23875630	23877406	RP1-150O5.3	ENSG00000235052.1	-	1.2011	0.613227	1.70961	1.15974	1.54758	1.44721	1.04914	1.41701	0.827864	1.29858	1.11354	1.74554	0.865471	0.848176	1.1915	1.11054	0.911932	0.914104
chr1	23884409	23886285	ID3	ENSG00000117318.8	-	88.2589	78.1655	68.7083	104.965	102.463	97.0965	125.673	109.615	127.61	108.738	112.235	117.855	241.993	229.16	243.616	117.677	99.3655	109.77
chr1	23907985	23967058	MDS2	ENSG00000197880.4	+	0	0	0	0	0.029397	0.1952	0.0816	0.185295	0.119376	0.318348	0.135272	0.202054	0	0.195552	0	0.161922	0.137923	0.199331
chr1	23996784	24006749	RP11-223J15.2	ENSG00000229239.2	+	0	0	0	0	0	0	0	0	0	0	0	0	0	0	0	0	0	0
chr1	24018269	24022915	RPL11	ENSG00000142676.8	+	2436	2665.36	2583.3	2344.9	2364.81	2464.86	2103.22	2171.03	2060.91	2092.24	2191.05	2067.62	1980.94	2228.2	2098.9	1881.67	2101.94	1991.14
chr1	24032291	24033424	RP5-886K2.1	ENSG00000203589.2	-	0	0	0	0	0	0	0	0	0	0	0	0.035279	0.004492	0	0	0	0	0
chr1	24063100	24063380	RN7SL532P	ENSG00000244609.2	-	0	0	0	0	0	0	0	0	0	0	0	0	0	0	0	0	0	0
chr1	24069645	24088549	TCEB3	ENSG00000011007.8	+	40.1148	36.7363	33.4698	46.0727	38.8543	40.7979	41.1926	35.4762	41.626	32.8127	37.9209	39.0319	38.6961	39.8146	42.7184	43.7999	44.8695	40.5031
chr1	24086872	24104777	RP5-886K2.3	ENSG00000236810.1	-	4.43413	4.76825	3.88777	3.79899	4.45481	3.42378	5.44416	4.57421	4.64696	3.218	4.14254	3.9901	7.46696	7.81488	6.18351	8.34423	7.8869	7.366
chr1	24104895	24114722	PITHD1	ENSG00000057757.5	+	61.1013	63.0512	54.7287	61.1869	56.9641	61.0929	56.1039	53.3462	55.4042	54.8079	52.5776	55.4146	79.3521	76.7689	82.9995	75.2779	68.9312	69.7018
chr1	24117460	24122029	LYPLA2	ENSG00000011009.6	+	98.3528	92.3966	95.2787	111.098	103.45	97.3798	86.671	89.7456	83.4918	78.931	97.0204	74.3885	106.766	101.582	97.5419	118.955	113.976	111.49
chr1	24122089	24127271	GALE	ENSG00000117308.10	-	14.931	12.1121	12.4393	16.2071	17.3722	14.438	27.8036	27.8719	27.8042	24.5395	26.8509	23.1954	35.8216	35.4016	33.3362	33.196	30.8763	30.0018
chr1	24128375	24165110	HMGCL	ENSG00000117305.10	-	32.0809	29.7515	29.4534	24.9305	26.1208	27.1841	29.4032	36.3729	32.021	31.3645	30.696	27.2831	42.129	46.1919	42.6413	45.2387	47.1725	49.4597
chr1	24171567	24194784	FUCA1	ENSG00000179163.11	-	13.2995	12.2894	12.8174	13.2509	12.3412	12.5574	16.4805	16.741	16.4723	16.8467	17.0485	16.668	25.6907	23.8395	24.3133	21.8225	23.2293	20.4207
chr1	24197016	24285549	CNR2	ENSG00000188822.6	-	0	0	0	0.007768	0	0	0	0	0	0.008004	0	0	0	0	0	0	0	0
chr1	24208284	24208575	RN7SL24P	ENSG00000264347.1	-	0	0	0	0	0	0	0	0	0	0	0	0	0	0	0	0	0	0
chr1	24208745	24208842	snoU13	ENSG00000238538.1	+	0	0	0	0	0	0	0	0	0	0	0	0	0	0	0	0	0	0
chr1	24227961	24229227	RP11-4M23.2	ENSG00000229106.1	-	0	0	0	0	0	0.029585	0	0	0	0.100368	0	0.010004	0	0	0.031146	0.050674	0.040964	0.171519
chr1	24233601	24234375	RP11-4M23.3	ENSG00000232557.3	+	0	0	0	0	0	0	0	0	0	0	0	0	0	0	0	0	0	0
chr1	24255560	24255637	MIR378F	ENSG00000264926.1	+	0	0	0	0	0	0	0	0	0	0	0	0	0	0	0	0	0	0
chr1	24275506	24275873	RP11-4M23.4	ENSG00000230228.2	-	0.033161	0.007698	0.006764	0.006822	0.140274	0.058182	0.001139	0.038839	0.065963	0.038396	0.014095	0.019614	0	0.005817	0.043191	0.17786	0.096401	0
chr1	24285599	24289952	PNRC2	ENSG00000189266.7	+	79.7689	83.5987	88.1748	84.9658	89.7359	90.2081	69.5764	69.792	77.6635	71.3871	74.444	73.7969	88.5924	94.9746	89.6699	81.4056	81.8532	84.5519
chr1	24291294	24307417	SRSF10	ENSG00000188529.10	-	88.5687	90.0259	91.1908	113.232	104.093	103.617	93.7398	90.9237	103.622	85.6621	97.9739	108.05	92.6548	96.7199	102.416	95.8037	96.7853	95.9734
chr1	24334371	24335009	RP11-4M23.7	ENSG00000215905.4	-	0	0	0	0	0	0	0	0	0	0	0	0	0	0	0	0	0	0
chr1	24367325	24413289	RP11-293P20.2	ENSG00000225315.2	+	0	0	0	0	0	0	0	0	0	0	0	0	0	0	0	0.488467	0	0
chr1	24382525	24438665	MYOM3	ENSG00000142661.14	-	0.077856	0.049951	0.024325	0.038701	0.160107	0	0.070456	0.05719	0.083959	0.092751	0.065117	0.132079	0.090529	0.116867	0	0.310925	0.201787	0.269838
chr1	24393264	24410055	RP11-293P20.4	ENSG00000230703.1	+	0	0	0	0	0	0	0	0	0	0	0	0	0	0	0	0	0	0
chr1	24446261	24469611	IL22RA1	ENSG00000142677.3	-	0.274168	0.188984	0.210711	0.212135	0.504134	0.159283	0.194753	0.094012	0.221277	0.134271	0.069039	0.042257	0.047421	0.077584	0	0.108613	0.106176	0.184461
chr1	24480647	24514449	IFNLR1	ENSG00000185436.7	-	5.73846	5.48472	4.68242	7.19419	6.3871	7.27984	6.25209	6.36851	5.26996	7.03771	5.6012	5.09088	7.13342	5.79635	6.40108	6.564	5.19301	5.94078
chr1	24526730	24538183	RP11-10N16.2	ENSG00000230023.2	+	0	0	0	0	0	0	0	0	0	0	0	0	0	0	0	0	0	0
chr1	24554407	24554520	AL590683.1	ENSG00000221032.3	+	0	0	0	0	0	0	0	0	0	0	0	0	0	0	0	0	0	0
chr1	24606257	24606345	AL590683.2	ENSG00000266511.1	-	0	0	0	0	0	0	0	0	0	0	0	0	0	0	0	0	0	0
chr1	24634046	24648391	RP11-10N16.3	ENSG00000232298.2	-	0	0	0	0	0	0	0	0.087223	0	0	0	0	0	0.346912	0	0	0	0.048148
chr1	24645812	24690972	GRHL3	ENSG00000158055.11	+	1.60074	1.28122	1.0513	1.14393	0.751654	0.722158	0.268436	0.18782	0.246473	0.302593	0	0.153039	1.81287	1.93494	2.50934	0.765921	0.519931	0.430918
chr1	24683489	24743424	STPG1	ENSG00000001460.13	-	8.1588	7.03191	6.55719	7.52619	7.71854	8.55349	14.6293	13.4665	14.4501	13.7901	13.777	14.9119	13.9525	13.9968	13.8304	15.241	13.8873	16.4702
chr1	24742284	24799466	NIPAL3	ENSG00000001461.12	+	8.74438	8.01841	7.56032	7.10652	7.61255	7.84099	7.72518	8.40298	8.37443	8.24357	7.80023	8.92171	6.1765	6.87619	6.19482	9.60248	12.0223	10.8744
chr1	24829387	24867530	RCAN3	ENSG00000117602.7	+	8.1602	6.8701	6.78743	7.93846	8.37693	9.22967	52.4363	46.0375	49.7754	49.0671	43.8519	55.9594	30.9497	26.8615	29.2306	58.7042	46.1561	57.8768
chr1	24855945	24856204	RN7SL857P	ENSG00000266551.1	-	0	0	0	0	0	0	0	0	0	0	0	0	0	0	0	0	0	0
chr1	24865292	24882515	RP4-594I10.3	ENSG00000264443.1	-	0.02035	0.053679	0	0	0	0.029208	0	0	0	0.015887	0.01399	0.034513	0.038187	0	0	0.04503	0.057523	0.012087
chr1	24882602	24935819	NCMAP	ENSG00000184454.6	+	0.3583	0.390292	0.409357	0.416121	0.484958	0.412152	0.755424	0.650439	0.681266	0.805711	0.69291	0.713443	0.357375	0.339698	0.398195	0.488472	0.713272	0.902262
chr1	24890118	24890465	RP11-496D1.2	ENSG00000227312.2	+	0	0	0	0	0	0	0	0	0	0	0.13442	0.029025	0	0	0.419979	0	0	0
chr1	24951902	24952004	Y_RNA	ENSG00000239106.1	-	0	0	0	0	0	0	0	0	0	0	0	0	0	0	0	0	0	0
chr1	24958207	24999758	SRRM1	ENSG00000133226.12	+	179.96	161.406	158.504	171.438	178.183	180.912	134.394	115.716	142.67	123.642	114.084	143.446	185.791	161.625	179.34	185.697	165.527	203.241
chr1	24993474	24993578	snoU13	ENSG00000238986.1	-	0	0	0	0	0	0	0	0	0	0	0	0	0	0	0	0	0	0
chr1	25071848	25170815	CLIC4	ENSG00000169504.10	+	320.505	320.402	331.018	322.575	323.458	331.443	256.041	271.757	261.547	275.534	290.385	295.453	229.807	249.386	235.408	253.651	273.572	263.798
chr1	25104364	25104470	RNU6-1208P	ENSG00000238482.1	-	0	0	0	0	0	0	0	0	0	0	0	0	0	0	0	0	0	0
chr1	25226002	25291612	RUNX3	ENSG00000020633.14	-	1.85036	1.92582	1.52056	2.03209	1.84103	1.50652	0.404142	0.329029	0.325881	0.253496	0.323743	0.402398	0.220042	0.135035	0.092861	0.155394	0.148024	0.124678
chr1	25287836	25289588	RP11-84D1.1	ENSG00000229162.1	+	0	0	0	0	0.125344	0	0.036724	0	0.097995	0.175811	0	0	0	0	0.089117	0	0	0
chr1	25294914	25297356	RP11-84D1.2	ENSG00000261025.1	-	0	0	0	0	0	0	0	0	0	0	0	0	0	0	0	0	0	0
chr1	25349994	25350077	MIR4425	ENSG00000264371.1	+	0	0	0	0	0	0	0	0	0	0	0	0	0	0	0	0	0	0
chr1	25370198	25439611	RP4-799D16.1	ENSG00000233755.1	-	0	0	0	0	0	0	0	0	0	0	0	0	0	0	0	0	0	0
chr1	25451544	25451945	RP4-781L3.1	ENSG00000233419.2	-	0	0	0	0	0	0	0	0	0	0	0	0	0	0	0	0	0	0
chr1	25534630	25535360	RP4-706G24.1	ENSG00000231953.1	+	0	0	0	0	0	0	0	0	0	0	0	0	0	0	0	0	0	0
chr1	25549170	25558993	SYF2	ENSG00000117614.5	-	53.8411	56.2877	59.3286	50.3284	49.2989	51.3783	65.5452	70.5553	75.436	69.8385	71.7129	75.233	72.5459	75.7339	76.929	70.2847	72.3102	74.0982
chr1	25568728	25664704	C1orf63	ENSG00000117616.13	-	34.6937	25.5869	28.9687	36.548	32.7353	33.8824	33.7465	28.6726	35.6647	30.9969	29.0798	39.9694	39.9354	37.2721	44.4382	41.5434	37.6629	54.3072
chr1	25574328	25574812	RP3-465N24.6	ENSG00000272432.1	+	0.370655	0.167997	0.177342	0	0.106245	1.23604	0.651667	0.566516	0.609228	0.556341	0.938014	0.710532	0.387606	0.586255	0.131839	0.333706	0.580699	0
chr1	25592593	25593627	RP3-465N24.5	ENSG00000261349.1	-	1.4048	0.826581	0.86117	1.34206	1.9583	1.64335	0.397346	0.769869	1.35951	0.659579	0.630226	0.853904	1.41338	1.20534	1.21714	1.24141	1.32435	1.62681
chr1	25598884	25656936	RHD	ENSG00000187010.14	+	0.008867	0.016458	0.057362	0	0	0.008018	0.03968	0.010302	0	0.004149	0	0	0.008361	0.014691	0	0.007852	0.108364	0.059836
chr1	25620655	25621134	SDHDP6	ENSG00000224183.1	-	1.05074	0.388184	0.669673	0.733729	0.481457	1.00832	1.68553	0.51479	0.509588	1.06473	0.488537	0.395166	0.752798	0.778536	0.896706	0.498016	0.86514	0.295539
chr1	25662920	25663956	RP11-335G20.7	ENSG00000259984.1	-	0	0	0	0	0	0	0	0	0	0	0	0.203596	0	0	0	0	0	0
chr1	25664408	25688852	TMEM50A	ENSG00000183726.6	+	82.4692	80.3251	66.8768	67.533	75.1073	64.86	90.6505	110.63	101.9	100.952	97.1005	98.5975	96.0582	97.6203	95.7305	107.961	90.7823	106.353
chr1	25667462	25667525	RNU6-1171P	ENSG00000252515.1	+	0	0	0	0	0	0	0.167751	0	0	0.208448	0	0	0	0.206939	0	0.079419	0	0
chr1	25672765	25672868	snoU13	ENSG00000238889.1	-	0	0	0	0	0	0	0	0	0	0	0	0	0	0	0	0	0	0
chr1	25688740	25756683	RHCE	ENSG00000188672.12	-	0.162634	0.149994	0.269126	0	0.344028	0.282974	0.103474	0.232669	0.278841	0.303733	0.321432	0.153874	0.569609	0.325434	0.529526	0.363627	0.225815	0.213279
chr1	25725203	25725771	RP3-469D22.1	ENSG00000238084.3	+	0.713094	0.651871	0.553589	0.34992	0.40017	0.929975	0.350546	0.377481	0.48662	0.830725	0.369393	0.5067	0.77929	0.54758	1.03194	1.04045	0.690171	0.305265
chr1	25732722	25732780	AL031284.1	ENSG00000266468.1	+	0	0	0	0	0	0	0	0	0	0	0	0	0	0	0	0	0	0
chr1	25757388	25826700	TMEM57	ENSG00000204178.5	+	16.6225	14.7723	13.47	14.2852	15.6541	16.2083	25.5454	25.3044	25.519	25.6488	25.4849	25.9043	18.6436	18.5048	18.6472	20.8943	21.2415	20.1139
chr1	25870071	25895377	LDLRAP1	ENSG00000157978.7	+	8.25273	8.94441	6.73383	10.2541	10.0055	9.65684	14.4222	12.1943	14.1298	11.9621	11.5332	12.6745	15.0815	13.5048	13.9989	14.2777	13.91	13.035
chr1	25907969	25916847	RP11-70P17.1	ENSG00000225643.1	+	0.136651	0.708048	0.596919	0.554963	0.642392	0	0.110055	0	0	0.160599	0.654361	0.256072	0.466048	0.565975	0	0	0.840129	0.861066
chr1	25943959	26112698	MAN1C1	ENSG00000117643.10	+	5.92217	4.57949	5.42726	5.35339	5.46081	5.6988	10.944	10.4523	9.58389	10.3194	9.86501	9.65404	3.79524	3.79009	3.28496	3.35111	3.48953	3.95306
chr1	25971035	25985602	RP1-187B23.1	ENSG00000233478.1	-	0	0	0	0	0	0	0	0	0	0	0	0	0	0	0	0	0	0
chr1	26126667	26144713	SEPN1	ENSG00000162430.12	+	103.851	95.3666	84.5132	103.523	104.909	102.789	122.352	91.3837	107.496	93.1626	77.7213	95.7372	121.274	76.0714	105.747	113.94	78.2932	106.885
chr1	26137961	26150235	RP1-317E23.6	ENSG00000255054.3	+	0	0.139681	0	0	0	0	0	0.288039	0.34548	0.191671	0	0.225195	0	0	0.348983	0	0	0
chr1	26143240	26146263	RP1-317E23.3	ENSG00000228172.1	-	0.091958	0.074459	0.026306	0.118504	0.075564	0.060218	0.07537	0.184645	0.105629	0.536043	0.169385	0.553896	0.109648	0.080475	0.087052	0.04939	0.090701	0.219598
chr1	26145131	26159432	MTFR1L	ENSG00000117640.13	+	21.0256	20.8297	19.9914	20.958	22.8252	19.9557	29.6394	34.9143	24.257	34.2231	28.5477	25.9249	35.3397	35.661	29.2952	30.2845	37.7686	35.822
chr1	26145212	26147288	AL020996.1	ENSG00000223474.2	-	0	0.121182	0.084786	0	0.081425	0.120521	0.079796	0.092739	0.204223	0.065713	0.270334	0.073507	0.260958	0.082305	0.16451	0.215742	0.221544	0.147748
chr1	26158404	26158625	RP1-317E23.7	ENSG00000272478.1	-	0.121091	0.092278	0.015668	0.138894	0.080642	0.084994	0.123209	0.171281	0.126401	0.096758	0.056881	0.083715	0.154943	0.07518	0.058651	0.040053	0.034063	0.080887
chr1	26158414	26185903	AUNIP	ENSG00000127423.6	-	18.2288	19.3453	18.1743	18.7659	18.1692	17.8661	15.6116	15.7437	18.8571	17.0244	17.3155	18.0101	19.6397	20.3131	20.4853	13.9164	14.3826	14.3137
chr1	26186104	26189911	RP1-125I3.2	ENSG00000236528.1	+	0.076172	0	0	0.050433	0	0	0.072928	0.046702	0	0.084577	0.246597	0	0	0.12193	0.094237	0	0.064059	0
chr1	26187701	26197744	PAQR7	ENSG00000182749.5	-	5.29212	4.95123	4.50903	5.53066	5.78592	5.20866	7.45834	6.87151	7.03366	6.89152	5.9519	5.96506	9.06117	7.55098	9.78153	8.24447	6.54701	7.60999
chr1	26203987	26204096	Y_RNA	ENSG00000207302.1	+	0	0	0	0	0	0	0	0	0.806604	0.399046	0.028644	0	0.127899	0	0	0.231036	0	0
chr1	26210672	26233482	STMN1	ENSG00000117632.16	-	436.159	530.352	408.919	437.649	398.26	487.488	720.985	765.142	699.488	843.611	908.552	786.42	628.229	700.14	736.626	736.336	755.647	627.952
chr1	26213851	26214101	SNRPFP2	ENSG00000229786.1	+	0	0	0	0	0	0	0	0	0	0	0	0	0	0	0	0	0	0
chr1	26215461	26215600	RP1-125I3.4	ENSG00000223624.1	+	0	0	0	0	0	0	0	0	0	0	0	0	0	0	0	0	0	0
chr1	26232853	26232945	MIR3917	ENSG00000264021.1	-	0	3.9e-05	3.1e-05	2e-05	0	0.080324	0.000206	0	7.9e-05	0.00012	0.00013	0	6.9e-05	0	5.2e-05	0	0.002994	0.000183
chr1	26238240	26238313	AL033528.1	ENSG00000266763.1	+	0	0	0	0	0	0	0	0	0	0	0	0	0	0	0	0	0	0
chr1	26286258	26324648	PAFAH2	ENSG00000158006.9	-	5.02832	5.53032	5.18765	6.44292	5.90101	5.69489	12.5924	11.7202	13.1048	11.7738	12.3679	12.0349	12.5362	12.0911	13.1222	11.4666	12.3819	12.8018
chr1	26290688	26290791	RNU6-110P	ENSG00000207237.1	+	0	0	0	0	0	0	0	0	0	0	0	0	0	0	0	0	0	0
chr1	26332497	26332621	SCARNA17	ENSG00000252190.1	+	0	0	0	0	0	0	0	0	0	0	0	0	0	0	0	0	0	0
chr1	26332707	26332790	SCARNA18	ENSG00000252691.1	+	0	0	0	0	0	0	0	0	0	0	0	0	0	0	0	0	0	0
chr1	26346375	26362955	EXTL1	ENSG00000158008.5	+	0.422916	0.354236	0.479172	0.348839	0.439879	0.265407	0.89292	0.933839	0.765288	1.05218	1.05281	0.828417	1.90839	1.9996	2.10783	1.31106	1.28885	0.984478
chr1	26363743	26372624	SLC30A2	ENSG00000158014.10	-	0	0	0	0	0.057569	0	0.643605	0.325048	0.270416	0.291609	0.163174	0.191016	0.12563	0.224172	0.141693	0.194057	0.10846	0.063218
chr1	26377795	26394927	TRIM63	ENSG00000158022.6	-	0.213654	0.177221	0.130534	0.075551	0.183398	0.134671	0.241158	0.328798	0.264874	0.100588	0.222793	0.262632	0.636565	0.631923	0.557775	0.389939	0.586628	0.685688
chr1	26398069	26398168	AL391650.1	ENSG00000265320.1	+	0	0	0	0	0	0	0	0	0	0	0	0	0	0	0	0	0	0
chr1	26437664	26452034	PDIK1L	ENSG00000175087.5	+	3.21804	2.62505	2.76389	2.48388	3.23086	2.8626	4.01133	4.33163	3.97836	5.31097	5.28334	5.39798	6.72473	6.57892	6.97033	6.56106	6.04798	7.23399
chr1	26485511	26489119	FAM110D	ENSG00000197245.4	+	0.651437	0.514039	0.40111	0.541447	0.982165	0.535219	1.18316	1.15817	1.04173	1.09355	1.11072	1.01585	1.78327	1.6957	1.93744	2.02814	2.12314	2.16925
chr1	26496362	26498551	ZNF593	ENSG00000142684.7	+	10.8023	9.20266	9.41107	9.2429	9.29195	8.62622	8.89763	8.59405	8.30246	8.13112	6.94234	6.60302	11.4112	10.1556	10.1241	8.45279	9.95954	7.60642
chr1	26496438	26498312	RP11-96L14.7	ENSG00000236782.1	-	0	0.188395	0	0.006141	0	0	0.192573	0	0	0	0	0	0	0	0	0	0	0
chr1	26503894	26516377	CNKSR1	ENSG00000142675.13	+	7.40265	6.17978	5.61078	7.40018	7.19799	7.75229	17.0699	15.3577	14.498	12.809	11.6528	13.4879	20.217	13.5765	19.6965	22.6913	16.668	20.4021
chr1	26517052	26529459	CATSPER4	ENSG00000188782.3	+	0.491241	0.287237	0.202205	0.344864	0.370803	0.242987	0.17969	0.419772	0.420523	0.367818	0.278883	0.46873	0.33533	0.206666	0.4637	0.274372	0.386133	0.257706
chr1	26536232	26556331	RP11-231P20.2	ENSG00000236155.2	+	2.08627	2.25729	2.12155	2.95693	2.68657	2.29045	2.47922	1.66767	2.11643	2.45648	2.69713	2.18093	2.81485	2.77849	1.69746	1.88607	1.64298	1.90377
chr1	26560691	26605299	CEP85	ENSG00000130695.9	+	36.6422	35.2872	30.2112	39.6305	37.5766	35.805	25.9994	23.0877	28.4872	26.541	22.3595	23.2874	31.8368	25.6893	29.9728	30.3935	30.067	32.5801
chr1	26589532	26589889	RP11-231P20.5	ENSG00000270733.1	-	0	0	0	0	0	0	0	0	0	0	0	0	0	0	0	0	0	0
chr1	26605667	26608007	SH3BGRL3	ENSG00000142669.9	+	77.8472	77.5583	76.0506	62.4977	73.9952	82.6368	99.6618	80.1679	82.8074	81.3814	70.9829	74.013	101.269	79.4723	98.4206	109.552	90.3781	95.4757
chr1	26607819	26644854	UBXN11	ENSG00000158062.16	-	6.04047	6.06563	4.22546	4.59058	7.77702	4.76963	9.13838	9.33433	8.33901	7.89401	7.64854	8.40867	18.4749	15.8654	17.1746	12.7538	12.8687	13.6617
chr1	26644448	26647014	CD52	ENSG00000169442.4	+	3.17621	2.02892	3.22811	2.64694	3.14951	3.12107	2.29447	2.36571	1.50358	1.5368	1.24709	1.73594	6.83371	5.53339	4.40541	3.01907	2.92741	3.57779
chr1	26648350	26680621	AIM1L	ENSG00000176092.9	-	18.9293	13.2804	14.6892	19.39	17.8867	18.9437	2.18833	1.73672	1.84268	2.45918	2.05425	2.75059	4.56275	4.61209	4.8632	4.60132	5.6155	4.77177
chr1	26653179	26653524	RP11-569G9.7	ENSG00000225854.2	+	0	0	0	0	0	0	0	0	0	0	0	0	0	0	0	0	0	0
chr1	26674956	26675210	RN7SL490P	ENSG00000265143.1	-	0	0.024997	0.011186	0	0	0	0	0	0	0	0	0	0	0	0.045852	0.073436	0	0
chr1	26688125	26701013	ZNF683	ENSG00000176083.13	-	0	0	0	0	0	0	0	0	0	0	0	0	0	0	0	0	0	0
chr1	26737269	26756213	LIN28A	ENSG00000131914.6	+	1420.24	1400.64	1337.07	1409.52	1387.78	1391.54	803.727	807.418	808.524	769.068	785.955	777.347	934.573	895.837	929.315	857.577	811.738	891.212
chr1	26758773	26797785	DHDDS	ENSG00000117682.12	+	20.0431	19.0918	19.5417	19.2194	18.7249	21.873	26.8164	26.0804	25.0919	27.714	26.163	23.017	33.3406	33.4812	39.1916	32.8869	37.6398	35.9567
chr1	26781144	26781678	RP3-476K8.4	ENSG00000223583.1	-	0.108285	0	0	0.198637	0.296673	0.298437	0	0.006009	0	0.147425	0	0.053389	0.006892	0.090511	0	0.017007	0.081636	0
chr1	26789247	26793773	RP3-476K8.3	ENSG00000225891.1	-	0.240606	0.102158	0.069471	0.187736	0.164083	0.183633	0.201465	0.297917	0.216385	0.230629	0.415106	0.68363	0.265951	0.248013	0.339135	0.46474	0.406304	0.16439
chr1	26798941	26802463	HMGN2	ENSG00000198830.6	+	409.17	401.558	402.384	464.159	468.372	443.356	767.924	790.921	766.652	717.297	760.26	743.879	885.585	955.19	987.315	715.134	721.573	737.445
chr1	26845845	26846741	DPPA2P2	ENSG00000224129.1	-	0	0.043563	0	0	0	0	0	0	0	0	0	0	0	0	0	0	0	0
chr1	26856252	26901521	RPS6KA1	ENSG00000117676.9	+	34.6585	32.1459	31.925	35.2973	34.959	34.4084	28.3337	26.6732	30.3434	25.0564	24.6502	25.8007	30.5106	30.1438	27.2185	31.5641	27.5634	28.6681
chr1	26881033	26881084	MIR1976	ENSG00000238705.1	+	0	0	0	0	0	0.142139	0	0	0	0	0	0	0	0	0	0	0.020361	0
chr1	26919737	26920037	RN7SL679P	ENSG00000243905.2	-	0	0	0	0	0	0	0	0	0	0	0	0	0	0	0	0	0	0
chr1	26920431	26920532	Y_RNA	ENSG00000252802.1	-	0	0	0	0	0	0	0	0	0	0	0	0	0	0	0	0	0	0
chr1	26966868	26967105	RP11-492M19.3	ENSG00000229247.2	-	0	0	0	0	0	0	0	0	0	0	0	0	0	0	0	0	0	0
chr1	26968777	26968880	snoU13	ENSG00000238316.1	-	0	0	0	0	0	0	0	0	0	0	0	0	0	0	0	0	0	0
chr1	26973938	26974172	RP4-785J1.1	ENSG00000235069.2	+	0	0	0	0	0	0	0	0	0	0	0	0	0	0	0	0	0	0
chr1	27018623	27020622	RP5-968P14.2	ENSG00000260063.1	-	0.130561	0.094504	0.141678	0.027996	0.142324	0.230184	0.676371	0.820738	0.587464	0.626042	0.680709	0.873686	0.517765	0.627852	0.835978	0.345885	0.44229	0.504266
chr1	27022524	27108595	ARID1A	ENSG00000117713.13	+	53.7981	45.8975	41.7652	56.8939	51.7661	52.2224	72.0066	52.1437	67.1417	54.313	45.4	65.9583	78.6466	53.2073	71.8317	87.4675	63.521	87.8769
chr1	27090115	27090393	RN7SL501P	ENSG00000266138.1	+	0.230453	0.745986	0.143918	0.286923	0	0.114483	0	0.10475	0.276014	0.282268	0.195463	0.455729	0.395583	0.332289	0.062861	0.196562	0.069258	0.137651
chr1	27113963	27124889	PIGV	ENSG00000060642.6	+	15.0974	15.2166	12.9087	13.171	12.891	13.6687	12.8246	11.736	12.6969	13.2195	11.2015	11.5873	19.3056	19.2513	15.8141	16.7684	13.8252	13.8194
chr1	27141313	27141601	RN7SL165P	ENSG00000241188.2	+	0	0.161104	0	0.200987	0	0.064851	0	0.099627	0.091717	0	0	0	0	0.269235	0.253595	0.422771	0.076134	0
chr1	27153201	27184093	ZDHHC18	ENSG00000204160.7	+	16.8442	16.2421	15.1808	17.8917	19.0815	18.2536	21.9218	22.1187	22.9156	19.7973	19.0361	19.8102	28.1935	26.0986	30.1333	30.4741	26.4797	30.5345
chr1	27189633	27190947	SFN	ENSG00000175793.10	+	7.17175	5.58595	6.25541	6.87057	6.1343	6.96686	5.00571	4.26836	5.00315	4.18072	3.48079	3.39083	1.78853	1.72475	1.27914	3.10644	2.17999	1.93886
chr1	27202624	27204736	RP1-50O24.6	ENSG00000226698.1	+	0	0.006358	0	0.014135	0.031505	0	0.00367	0	0.007246	0	0	0	0.021539	0	0.007128	0.011101	0	0
chr1	27202624	27216788	GPN2	ENSG00000142751.10	-	9.99774	9.51582	9.0013	11.5632	10.341	10.0754	10.1779	10.0085	12.8749	9.36492	8.88503	9.54322	12.3903	10.5974	11.0596	12.5786	10.2124	10.5227
chr1	27216979	27226957	GPATCH3	ENSG00000198746.8	-	10.4703	11.0111	10.5912	11.6766	10.7719	10.4541	14.1149	15.4476	14.883	13.1269	11.9803	13.0956	17.9572	17.0003	18.0393	16.1152	16.1523	15.1247
chr1	27226729	27273353	NUDC	ENSG00000090273.9	+	155.092	150.611	140.795	172.945	162.528	159.714	146.051	144.159	148.259	139.782	140.219	146.614	160.883	161.138	171.026	153.386	142.803	141.091
chr1	27237980	27240457	NR0B2	ENSG00000131910.4	-	0	0.047948	0	0	0	0	0	0	0	0	0	0	0	0.057284	0	0	0	0
chr1	27276053	27286897	C1orf172	ENSG00000175707.7	-	13.0776	12.8987	12.795	12.4039	13.678	11.5724	10.1829	11.4341	11.2371	10.2714	9.98906	8.53457	17.4932	18.3153	18.4981	16.5159	14.7022	14.402
chr1	27306656	27307466	RP11-344H11.4	ENSG00000172746.6	+	0	0	0	0	0	0	0	0	0.560726	0	0.109727	0.146852	0	0.263258	0.211115	0	0.272192	0.09122
chr1	27310119	27310515	RP11-344H11.5	ENSG00000224064.1	+	0.10114	0.099825	0	0.077523	0	0	0	0.071466	0.052008	0.059619	0	0.084953	0.010417	0.107925	0	0.10512	0.266795	0.135275
chr1	27312388	27312831	OSTCP2	ENSG00000225294.1	-	0.163135	0.01498	0.102176	0.060547	0.033514	0.033294	0.010616	0	0.128195	0.094663	0.387035	0.132625	0.081431	0.297383	0	0.119298	0	0.007032
chr1	27320198	27327389	TRNP1	ENSG00000253368.3	+	27.6602	30.3549	27.019	27.7077	27.6976	28.5706	32.1907	28.622	30.5815	28.1481	29.3946	30.3648	20.4764	16.1459	15.4191	18.7437	19.1923	15.0174
chr1	27331511	27339327	FAM46B	ENSG00000158246.7	-	65.6184	58.9872	59.6545	63.3602	60.235	56.4153	6.62765	6.20088	6.39387	6.08878	5.38423	5.96354	12.0126	10.5468	10.5307	14.4519	14.8958	14.8689
chr1	27425306	27493472	SLC9A1	ENSG00000090020.6	-	12.127	10.9641	9.96543	12.453	12.1231	12.0537	16.1559	13.5953	14.903	12.9062	12.7428	12.9551	19.9122	14.416	19.0547	16.9954	13.758	14.2749
chr1	27503242	27503768	RP11-40H20.5	ENSG00000229985.2	+	0	0	0	0	0	0.006846	0	0	0	0	0	0	0.033169	0	0	0	0	0
chr1	27527325	27527964	CHCHD3P3	ENSG00000214973.3	-	0.194366	0.163684	0.292472	0.247982	0.303326	0.679934	0.14177	0	0.18877	0.254676	0.201852	0.07071	0.308164	0.044944	0.174863	0.432624	0.071234	0.406391
chr1	27533421	27534287	NPM1P39	ENSG00000225159.1	+	12.1707	9.83257	12.5677	11.1576	10.7868	15.8713	5.12209	4.69301	5.54837	5.33234	6.43265	5.45814	5.6687	6.41051	6.72443	4.89731	5.24797	4.76218
chr1	27537756	27537975	SNRPEP7	ENSG00000225990.2	+	0	0	0	0	0	0	0	0	0	0.260162	0	0	0	0	0.319617	0	0.320141	0
chr1	27555597	27560843	RP11-40H20.4	ENSG00000224311.1	-	0	0	0	0	0	0	0	0	0	0	0	0	0	0	0	0	0	0
chr1	27561007	27635110	WDTC1	ENSG00000142784.11	+	15.221	14.0988	13.343	14.6523	14.879	13.8169	36.4841	30.7328	30.1926	31.6304	27.2607	27.7471	39.4835	34.4638	38.0735	45.2179	42.7537	43.8452
chr1	27581955	27582058	Y_RNA	ENSG00000252098.1	-	0	0	0	0	0	0	0	0	0	0	0	0	0	0	0	0	0	0
chr1	27637731	27638329	RP11-4K3__A.3	ENSG00000243659.1	+	0	0	0	0	0	0	0	0	0	0	0.577573	0	0.323421	0.246565	0	0.147987	0	0
chr1	27648651	27662891	TMEM222	ENSG00000186501.10	+	20.1523	13.9481	16.6928	16.7061	17.7668	15.6273	23.008	21.0476	21.2766	18.2741	21.3468	18.1746	27.1039	26.366	30.1207	26.7309	22.9435	22.0518
chr1	27651710	27651816	RNU6-48P	ENSG00000206888.1	+	1.13313	0.644927	0.209591	0.482254	0.618068	2.08217	1.38514	0.758311	1.20732	0.277511	0.505135	0.594151	1.20376	0.075426	0.611246	2.13763	0.690194	0
chr1	27651820	27652287	RP11-4K3__A.5	ENSG00000241547.1	+	0.480569	0.36893	0.863088	0.65023	0.997416	1.41479	0.931039	0.773829	1.70747	0.932871	1.05133	0.936931	0.873341	1.0935	1.39907	1.99322	0.863097	0.543072
chr1	27668513	27680421	SYTL1	ENSG00000142765.13	+	5.12679	4.24984	3.48506	5.49737	4.22504	4.75961	2.50948	2.86246	2.84154	2.24468	2.10014	2.19121	5.35038	4.47075	4.65451	5.06485	3.70789	5.05046
chr1	27681675	27693383	MAP3K6	ENSG00000142733.10	-	4.69614	3.32873	3.93027	4.66608	4.16796	7.3397	4.27944	4.39494	3.61427	2.84167	2.79686	3.03178	5.06557	2.17337	3.17141	3.12355	3.5085	2.89062
chr1	27695603	27701315	FCN3	ENSG00000142748.8	-	0.55916	0.134132	0.353999	0.173854	0.472879	0.374174	0.096607	0.164287	0.096564	0.194699	0.098147	0.044248	0.465821	0.266761	0	0.350046	0.189308	0.196737
chr1	27705666	27709870	CD164L2	ENSG00000174950.6	-	5.06937	4.28468	3.80657	4.34383	4.20958	4.44547	2.74855	2.05961	2.27135	2.01689	0.982452	1.33518	0.941884	0.892236	1.59825	1.4707	1.60602	0.939255
chr1	27715972	27716649	RP1-144C9.2	ENSG00000231207.1	+	0	0	0	0	0	0	0	0	0	0	0	0	0	0	0	0	0	0
chr1	27719148	27722318	GPR3	ENSG00000181773.6	+	8.93444	7.07925	7.6362	10.0525	9.93446	9.57863	6.4342	6.64277	7.90566	6.83138	6.88114	7.10294	4.06766	3.60073	3.97014	4.09761	3.44233	4.69767
chr1	27730730	27816669	WASF2	ENSG00000158195.6	-	89.7309	85.2521	78.2595	84.522	82.177	86.9573	95.094	86.6914	89.4588	90.0147	84.3318	91.1172	87.2718	73.2852	82.772	96.7617	88.638	102.797
chr1	27783709	27786093	RP4-752I6.1	ENSG00000241169.1	+	0	0	0	0	0	0	0	0	0	0	0	0	0	0	0	0	0	0
chr1	27852316	27857072	RP1-159A19.4	ENSG00000237429.1	+	0.676024	0.404444	0.431853	0	0	0	0.230395	0.628663	0	0.521583	0.210686	0.508785	0	0	0.357658	0	0	0
chr1	27860546	27930942	AHDC1	ENSG00000126705.9	-	10.9541	8.97106	8.12896	11.9583	11.2116	10.6912	10.9753	8.20859	9.15209	7.07596	6.69077	8.04754	15.7607	11.4105	15.4587	12.0342	9.42718	11.3602
chr1	27938575	27961788	FGR	ENSG00000000938.8	-	0.755065	0.849915	0.758515	0.753963	0.462759	0.68177	0.160913	0.057767	0.053063	0	0.070785	0.12932	0	0.025327	0	0.168019	0	0
chr1	27975930	27976121	RP1-159A19.3	ENSG00000235912.1	+	5.7927	4.16524	5.29378	6.72207	5.54938	6.4373	3.76489	5.30475	7.81578	7.39205	8.84393	7.40578	6.5097	5.62148	5.77096	3.84136	5.83347	6.02729
chr1	27986839	27989233	RP11-288L9.1	ENSG00000233975.1	-	0	0	0.099508	0.125885	0	0	0	0	0	0	0	0	0	0	0	0	0	0
chr1	27992572	27998729	IFI6	ENSG00000126709.10	-	3.79519	4.77064	3.94874	3.15591	3.7697	3.04713	1.29835	0.82184	2.10229	2.23	1.89432	1.37222	2.51864	1.97398	1.21217	1.91142	2.30973	2.31751
chr1	27995979	27996787	RP11-288L9.4	ENSG00000225886.1	+	0	0	0	0	0	0	0	0	0	0	0	0	0	0	0	0.356141	0	0
chr1	28002114	28002220	RNU6-949P	ENSG00000206767.1	-	0	0	0	0	0	0	0	0	0	0	0	0	0	0	0	0	0	0
chr1	28013321	28013982	CHMP1AP1	ENSG00000226662.2	-	0	0	0	0	0	0	0	0	0	0	0	0	0	0	0	0	0	0
chr1	28020242	28020346	RNU6-424P	ENSG00000207095.1	+	0	0	0	0	0	0	0	0	0	0	0	0	0	0	0	0	0	0
chr1	28052490	28089633	FAM76A	ENSG00000009780.11	+	11.1734	9.68576	9.76309	12.5461	10.5104	10.4121	14.0473	11.5534	13.4193	12.2621	11.5051	13.4357	10.0515	10.3371	10.3043	11.5844	9.59075	11.3103
chr1	28065602	28065950	RP3-426I6.2	ENSG00000231344.1	+	0.037598	0.132613	0.065385	0.28534	0	0.186823	0.093787	0.017726	0.319787	0.095563	0.339602	0.34446	0.336395	0.223541	0	0.047524	0	0.276447
chr1	28066465	28067140	RPEP3	ENSG00000230833.1	+	0	0	0	0.060258	0	0	0.464831	0.028401	0.065213	0	0	0	0	0.214592	0	0	0.03994	0.023556
chr1	28099694	28150963	STX12	ENSG00000117758.9	+	11.657	10.2612	12.2293	9.40602	10.2497	10.3662	19.9091	20.0708	17.0276	18.167	17.5778	20.1466	16.2645	15.9183	15.6866	18.8424	19.3071	19.9646
chr1	28100369	28100552	RP3-426I6.5	ENSG00000269971.1	+	0	0	0.089436	0	0	0	0	0	0.183482	0	0	0	0	0	0.567931	0	0	0
chr1	28146494	28146852	RP3-426I6.6	ENSG00000270031.1	+	0.804848	0.722564	0.154019	0.204338	0.198799	0.025	0.169221	0.070117	0.305439	0.300282	0.310563	0.073924	0.525672	0.173506	0.322635	0	0	0.122632
chr1	28151049	28151154	RNU6-1245P	ENSG00000223062.1	+	0	0	0	0	0	0	0	0	0	0	0	0	0	0	0	0	0.434504	0
chr1	28157289	28178187	PPP1R8	ENSG00000117751.13	+	51.0756	56.2921	48.1914	45.8995	50.8619	51.0275	48.7766	52.7272	53.3615	50.0916	52.7788	52.5464	60.1783	61.2933	58.937	51.941	56.5967	57.6782
chr1	28160912	28161077	SCARNA1	ENSG00000252947.1	+	0.175483	0	0.039653	0.561228	0.240696	0.519993	0.418021	0.771048	1.88923	0.184063	0.648279	1.30522	0.04676	0.757944	0	0.797714	0.338048	0.344209
chr1	28177085	28177255	AL109927.1	ENSG00000268552.1	-	0.001499	0	0	0	0	0	0	0	0	0	0.000364	0	0.003625	0	0	0.002121	0	0
chr1	28199055	28213196	THEMIS2	ENSG00000130775.11	+	8.60689	9.39614	9.58566	11.2657	10.8141	9.23409	6.88547	6.96621	8.4918	8.35953	7.29091	7.12746	8.87698	5.93397	8.15351	8.13576	7.7327	6.96726
chr1	28218035	28241257	RPA2	ENSG00000117748.5	-	50.5507	55.6429	60.3475	49.3759	51.4396	56.4277	44.5754	45.3231	46.5274	42.577	43.7144	43.6978	63.4451	66.4677	66.7644	51.1228	47.343	46.0135
chr1	28261504	28285668	SMPDL3B	ENSG00000130768.10	+	39.2082	43.2763	35.0281	48.626	39.0968	39.2666	12.7484	14.4099	13.4527	15.8891	14.5907	15.8114	18.672	18.2253	16.8042	27.4195	26.3809	23.443
chr1	28265386	28286704	RP11-460I13.2	ENSG00000227050.1	-	0	0.007717	0.068932	0	0.119024	0	0	0	0.081734	0.220048	0	0.409826	0	0	0	0	0	0.053758
chr1	28285973	28294607	XKR8	ENSG00000158156.7	+	12.6494	13.1014	13.4095	12.9838	12.2561	12.5712	15.4043	15.6489	14.7406	15.8844	13.8551	12.9609	15.4931	15.0297	15.1976	15.2367	14.2308	14.1432
chr1	28296855	28415207	EYA3	ENSG00000158161.11	-	20.8095	17.9557	19.1268	20.1706	21.2842	20.2498	19.8941	20.2631	19.8679	20.6177	18.4876	19.8115	21.097	21.0279	20.4504	23.3606	21.423	23.3511
chr1	28316669	28317035	RP11-460I13.6	ENSG00000238231.2	-	0.358255	0.071739	0.309095	0.383047	0	0	0.298243	0	0.17638	0.077978	0.277377	0	0.519501	0.426846	0.401223	0.059772	0.699611	0
chr1	28358397	28358691	RN7SL559P	ENSG00000240750.2	-	0.303356	0.369203	0.026776	0.32431	0.561386	0.114537	0.301799	0.571272	0.55992	0.256747	0.12242	0.715667	0.253255	0.371788	0	0.794386	0.006281	0.276247
chr1	28421582	28422933	SPCS2P4	ENSG00000228589.2	-	24.7935	25.4372	24.691	27.5109	26.6034	27.0997	31.7677	29.6388	31.5044	30.3313	33.1933	33.2271	28.0801	30.059	28.1412	27.8884	28.0761	27.7532
chr1	28436250	28436809	RP5-1053E7.2	ENSG00000228943.1	+	0	0	0	0	0	0	0	0	0	0	0	0	0	0	0	0	0	0
chr1	28446960	28447832	RP5-1053E7.3	ENSG00000214812.3	-	0	0	0	0	0	0	0	0	0	0	0	0	0	0	0	0	0	0
chr1	28469248	28469352	RNU6-176P	ENSG00000253005.1	-	0	0	0	0	0	0	0	0	0	0	0	0	0	0	0	0	0	0
chr1	28470667	28470728	RNU7-29P	ENSG00000252429.1	-	0	0	0	0	0	0	0	0	0	0	0	0	0	0	0	0	0	0
chr1	28473677	28520447	PTAFR	ENSG00000169403.7	-	0.963852	1.10824	0.965297	0.928283	1.42031	0.809877	0.974525	1.13201	1.06967	1.42429	1.244	0.78303	0.851378	0.514927	0.846456	0.82113	0.604603	0.714576
chr1	28525967	28559536	DNAJC8	ENSG00000126698.6	-	214.702	210.112	232.707	218.174	210.23	212.736	205.91	226.986	219.926	225.491	225.073	225.227	240.697	257.517	250.421	225.558	228.895	236.783
chr1	28527013	28527152	AL353354.1	ENSG00000215902.1	-	0.670907	1.07716	0.874395	0.677718	1.51072	1.28149	2.57028	1.45946	0.854648	1.09644	1.11399	1.21382	0.674303	1.20276	2.05577	1.22567	1.12255	0.762561
chr1	28527070	28527419	AL353354.2	ENSG00000269804.1	+	0.000534	0.00241	0	0.001463	0.003341	0.001311	0.002704	0	0.002264	0.000908	0	0.000146	0.002358	0.001032	0.001065	0	0.001348	0.002483
chr1	28562620	28573417	ATPIF1	ENSG00000130770.13	+	178.532	173.751	186.259	187.647	184.098	198.711	162.147	169.502	177.29	179.11	177.248	176.343	205.201	198.262	214.123	206.838	209.076	190.369
chr1	28566020	28567964	RP5-1092A3.4	ENSG00000270605.1	-	3.33541	2.76581	2.38965	3.26551	3.49807	2.67976	2.37541	1.71032	2.20357	2.01343	1.70784	2.25482	2.66648	1.65551	2.6918	2.38949	1.3978	1.79305
chr1	28573655	28574079	RP5-1092A3.5	ENSG00000271398.1	+	0.069159	0	0.137845	0	0	0	0.191	0	0	0.024808	0	0	0.111866	0.11053	0.334432	0	0.078475	0
chr1	28586038	28609002	SESN2	ENSG00000130766.4	+	13.1254	11.5011	11.9233	15.2337	14.5683	14.885	8.46224	9.07566	8.51477	8.70733	8.52515	8.84247	12.0124	10.6355	10.2413	10.7655	10.6187	9.61051
chr1	28655513	28662476	MED18	ENSG00000130772.9	+	18.4771	19.9095	17.1892	16.1158	17.6052	17.621	29.766	26.6657	24.0714	25.4695	26.1353	22.4655	29.5551	26.8287	26.7501	24.3036	25.6302	21.2365
chr1	28696114	28826881	PHACTR4	ENSG00000204138.8	+	30.8133	27.7174	26.746	32.592	31.5926	30.2351	30.4389	26.4998	30.0724	27.7054	25.0953	31.2165	36.9334	29.9908	36.1974	33.6551	30.7891	35.479
chr1	28749066	28749166	Y_RNA	ENSG00000206779.1	-	0	0	0	0	0	0	0	0	0	0	0	0	0	0	0	0	0	0
chr1	28780052	28780445	RP1-308E4.1	ENSG00000229820.2	+	0.30573	0.243374	0	0	0	0.025459	0.044529	0.123987	0.753479	0.148545	0.122418	0.155324	0.144062	0.044119	0.44699	0.547253	0.216999	0.158494
chr1	28807874	28807992	RNU6ATAC27P	ENSG00000221216.1	+	0.23156	0.975802	0.182539	0.042191	0.768776	0.155278	0.468698	0.292199	0.180539	0	0.215896	2.00214	0.644125	0.366925	0.63558	0.368677	0.171275	0.590357
chr1	28832455	28865812	RCC1	ENSG00000180198.11	+	156.742	148.729	144.458	143.759	137.621	136.995	89.5085	80.2686	84.0582	82.1292	86.4334	76.8334	91.6091	91.881	95.9117	96.0733	99.7185	84.106
chr1	28832492	28837404	SNHG3	ENSG00000242125.2	+	94.9002	92.4804	89.8725	97.2374	94.5734	91.8001	59.309	54.0423	61.693	53.3287	50.0029	61.8021	60.8728	44.4783	54.8289	59.7921	43.6602	48.8898
chr1	28835071	28835274	SNORA73B	ENSG00000200087.1	+	7.28642	6.93522	7.20737	9.45064	9.49315	9.459	3.67238	3.43513	4.65844	4.82976	3.39205	4.93767	6.28412	3.78272	5.13684	7.73698	3.15302	3.75751
chr1	28843988	28844087	snoU13	ENSG00000238821.1	+	0.257186	0.354736	0.603393	0.278925	0	0.776078	0.652018	0.906624	0.728226	0	0.276307	0.308959	1.71252	0.086914	0	0.021401	0.386459	0.218563
chr1	28852830	28853739	PRDX3P2	ENSG00000231468.2	-	0	0	0	0	0	0	0	0	0	0	0	0	0	0	0	0	0	0
chr1	28879597	28905051	TRNAU1AP	ENSG00000180098.5	+	19.9933	19.6957	22.872	18.6261	17.8864	22.0042	32.4751	35.4031	31.6927	33.2199	30.9147	30.5077	42.7266	43.9401	35.8215	55.1857	54.5955	55.3316
chr1	28905050	28909495	SNHG12	ENSG00000197989.9	-	48.8847	48.8656	45.055	58.9912	49.7	52.8173	11.8042	9.81067	11.8189	11.0015	10.1088	13.6141	25.3015	16.0202	17.4919	22.9745	18.8135	21.351
chr1	28905261	28905334	SNORD99	ENSG00000221539.1	-	3.5074	3.03727	3.15484	5.56343	1.81345	2.43996	1.70206	1.24246	1.10851	1.34919	1.84074	1.40509	4.8546	1.67788	2.95268	3.89706	1.91012	2.04217
chr1	28915835	28969597	TAF12	ENSG00000120656.7	-	25.5334	26.3215	28.1187	25.4094	25.6423	28.7386	24.2705	27.5845	26.1364	26.2772	26.2518	25.5757	40.2344	46.5484	46.948	41.3168	42.1694	42.7986
chr1	28918712	28921955	RAB42	ENSG00000188060.6	+	3.74165	4.11289	3.94301	6.17946	4.85714	5.00384	4.69087	4.32357	4.57861	4.45325	3.19419	4.0709	2.41917	2.81739	2.32936	3.33321	2.59567	2.89958
chr1	28969740	28975093	RP11-442N24__B.1	ENSG00000229388.1	+	0.082392	0	0	0	0	0	0.12757	0	0	0	0.081379	0.148538	0	0	0	0.435659	0	0
chr1	28975112	28975245	RNU11	ENSG00000270103.2	+	2.12701	2.42805	1.95673	1.84632	1.44745	3.02189	1.19789	0.421871	1.99891	2.35407	0.487903	0.603019	0.544869	0.761349	3.67018	2.24793	2.19067	0.901748
chr1	28995244	29045865	GMEB1	ENSG00000162419.8	+	19.0947	16.3889	14.1901	19.3248	15.7314	18.6288	15.0173	15.3473	16.5957	13.4573	12.7621	15.9089	18.8547	9.09637	14.4856	18.5865	13.8553	14.8132
chr1	29016177	29016306	SCARNA24	ENSG00000252777.1	+	0	0.494583	0	0	0	0.560433	0	0.105021	0	0	0.548139	0	0	0	0	0.218129	0	0.297822
chr1	29063133	29096287	YTHDF2	ENSG00000198492.10	+	124.669	126.75	130.692	138.443	127.226	126.761	120.29	117.889	118.591	113.006	107.414	112.994	129.164	123.075	121.529	129.336	115.866	108.312
chr1	29138654	29190208	OPRD1	ENSG00000116329.6	+	0.659489	0.749395	0.744825	0.692125	0.643532	1.19769	0.192332	0.123857	0.259669	0.169809	0.131161	0.188896	0.476244	0.124816	0.26034	0.204181	0.156223	0.036961
chr1	29194087	29197779	RP1-212P9.2	ENSG00000226852.2	+	1.84932	1.86316	2.04745	2.16675	2.04631	2.54755	0.261705	0.342891	0.455893	0.4753	0.171896	0.288937	0.445738	0.637908	0.970657	0.601403	0.239092	0.508295
chr1	29196995	29203848	RP1-212P9.3	ENSG00000233427.1	-	0.153168	0.070014	0.158964	0.742665	0.222105	0.157891	0.057921	0.150587	0	0	0	0.10501	0.156432	0.077951	0	0.195661	0	0
chr1	29208238	29208347	Y_RNA	ENSG00000199756.1	-	0	0	0	0	0	0	0	0	0	0	0	0	0	0	0	0	0	0
chr1	29213603	29446553	EPB41	ENSG00000159023.14	+	90.5795	78.939	89.2098	93.5199	90.4276	91.7976	88.274	85.1966	79.6049	90.954	83.7004	92.618	88.576	90.0476	78.5195	100.464	99.1251	99.2714
chr1	29308790	29309120	RP4-604A21.1	ENSG00000225616.2	-	0.612876	0.826109	0.932682	0.613467	0.962363	0.991291	0.297454	0.513007	0.864016	0.475198	0.767397	0.339259	0.964402	1.0522	0.271553	0.675256	1.20354	0.583905
chr1	29312222	29312322	Y_RNA	ENSG00000206704.1	+	0	0	0	0	0	0	0	0	0	0	0	0	0	0	0	0	0	0
chr1	29445940	29450447	TMEM200B	ENSG00000253304.1	-	5.58227	5.64066	5.26667	5.8327	5.37125	4.04966	10.9287	11.693	7.99858	7.84101	7.85096	8.28849	26.0732	20.3822	23.7657	10.4538	9.04563	9.51212
chr1	29471006	29473506	RP11-242O24.3	ENSG00000225750.1	-	0	0	0	0.081978	0	0	0	0	0.327016	0	0	0	0	0	0	0	0	0
chr1	29474255	29508499	SRSF4	ENSG00000116350.11	-	122.72	118.559	119.719	116.131	116.195	116.997	100.854	92.7128	102.189	100.326	93.247	109.726	113.901	105.174	105.981	117.145	111.199	124.776
chr1	29479001	29479503	RP11-242O24.5	ENSG00000227637.1	+	0	0	0	0	0	0	0	0	0	0	0	0	0	0	0	0	0	0
chr1	29519385	29557454	MECR	ENSG00000116353.11	-	18.1971	15.2461	15.2255	17.8978	16.268	18.4514	20.4875	23.1566	20.5838	25.6455	20.8097	20.0299	24.5342	26.556	28.661	26.2847	27.7135	24.3796
chr1	29550445	29551328	RP11-467D18.2	ENSG00000237934.1	+	0	0	0	0	0	0	0	0	0	0	0	0	0	0	0	0	0	0
chr1	29563028	29653325	PTPRU	ENSG00000060656.15	+	29.9985	29.4199	24.4793	29.5282	29.6383	29.562	40.9858	36.2964	34.5111	35.9954	28.9725	29.7881	55.5487	48.8638	53.5626	47.22	41.8347	45.8205
chr1	29580054	29580195	AL645859.1	ENSG00000221550.1	-	0	0	0	0	0	0	0	0	0	0	0	0	0	0	0	0	0	0
chr1	29656132	29676626	RP3-437I16.1	ENSG00000230523.1	-	0	0	0	0	0	0	0	0	0	0	0	0	0	0	0	0	0	0
chr1	29758993	29759074	AL139151.1	ENSG00000266678.1	+	0	0	0	0	0	0	0	0	0	0	0	0	0	0	0	0	0	0
chr1	29814705	29823405	RP11-810H18.1	ENSG00000225011.4	-	0	0	0	0	0	0	0	0	0	0	0	0	0	0	0	0	0	0
chr1	30117392	30117525	AC092265.1	ENSG00000221126.1	-	0	0	0	0	0	0	0	0	0	0	0	0	0	0	0	0	0	0
chr1	30181698	30182394	RP4-656G21.1	ENSG00000228176.1	-	0	0	0	0	0	0	0	0	0	0	0	0	0	0	0	0	0	0
chr1	30357749	30357852	AL645944.1	ENSG00000222787.1	+	0	0	0	0	0	0	0	0	0	0	0	0	0	0	0	0	0	0
chr1	30377712	30378204	RP11-179G8.1	ENSG00000270927.1	-	0	0	0	0	0	0	0	0	0	0	0	0	0	0	0	0	0	0
chr1	30486799	30510459	RP11-111I12.1	ENSG00000233399.2	-	0	0	0	0	0	0	0	0	0	0	0	0.098047	0.105394	0.07016	0	0	0	0
chr1	30613110	30614454	RP5-893G23.1	ENSG00000233372.1	+	0	0	0	0	0	0	0.06083	0	0.149888	0.353803	0	0.138743	0.109617	0	0	0	0.2181	0.065733
chr1	30699370	30699462	RP3-357I16.1	ENSG00000231251.1	+	0	0	0	0	0	0	0	0	0	0	0	0	0	0	0	0	0	0
chr1	30882407	30884485	RP4-591L5.1	ENSG00000236335.1	-	0	0	0	0	0	0	0	0	0	0	0	0	0	0	0	0	0	0
chr1	30888672	30893955	RP4-591L5.2	ENSG00000231949.1	+	0	0	0	0	0	0	0	0	0	0	0	0	0	0	0	0	0	0
chr1	31184124	31196434	MATN1	ENSG00000162510.5	-	0.260737	0.152391	0.078855	0.221863	0.040239	0.173646	0.134142	0.061846	0.080033	0.032083	0	0.098302	0.166585	0.071373	0.100211	0	0.062837	0
chr1	31191351	31199674	MATN1-AS1	ENSG00000186056.5	+	0.258985	0.178489	0.104304	0.154844	0.315068	0.081393	0.068046	0.218893	0.381632	0.166979	0.148821	0.144816	0.199786	0.19683	0.318833	0.316034	0.165661	0.357619
chr1	31205316	31230667	LAPTM5	ENSG00000162511.7	-	0.266566	0.170421	0.276762	0.281309	0.275927	0.211605	0.130868	0.189621	0.04644	0.194748	0.074468	0.386835	0.344045	0.228349	0.294541	0.737805	0.633999	1.12098
chr1	31212003	31212079	MIR4420	ENSG00000264773.1	-	0	0	0	0	0	0	0	0	0	0	0	0	0	0	0	0	0	0
chr1	31283225	31288400	RP5-1125N11.1	ENSG00000229607.1	-	0	0	0	0	0	0	0	0	0	0	0	0	0	0	0	0	0	0
chr1	31297075	31307131	RP1-65J11.1	ENSG00000223382.3	+	0	0	0	0	0	0	0	0	0	0	0	0	0	0	0	0	0	0
chr1	31316670	31316957	RN7SKP91	ENSG00000222784.1	+	0	0	0	0	0	0	0	0	0	0	0	0	0	0	0	0	0	0
chr1	31331005	31333101	RP1-65J11.5	ENSG00000235143.1	+	0	0	0	0	0	0	0	0	0	0	0	0	0	0	0	0	0	0
chr1	31342314	31381608	SDC3	ENSG00000162512.11	-	26.5726	25.2477	24.7964	30.1797	28.4588	27.9095	44.5852	42.0436	39.9992	36.3883	33.0963	33.5202	123.577	131.126	133.651	72.1021	67.3574	69.9979
chr1	31404353	31538838	PUM1	ENSG00000134644.11	-	95.5513	98.9083	98.3126	104.992	97.7257	97.2955	86.5902	84.0311	83.5071	84.959	85.5475	89.5375	109.448	115.243	113.175	122.271	116.494	123.471
chr1	31408535	31408620	SNORD103A	ENSG00000200154.1	-	2.39719	4.01929	2.47592	3.00311	3.3343	3.99335	2.78639	1.71945	3.75391	2.84102	1.69944	2.8736	4.3602	2.46441	4.84025	5.02832	5.25318	4.11122
chr1	31421964	31422049	SNORD103B	ENSG00000202107.1	-	3.67425	4.56043	3.93034	4.20944	5.58142	5.11618	3.15299	3.66892	4.48432	4.69844	2.81219	4.05496	5.98407	2.8061	5.93175	5.92139	5.68408	6.51713
chr1	31441011	31441083	SNORD85	ENSG00000200181.1	-	0.23008	0.485939	0.838588	0.068776	0	0	0.261855	0	0	0.035371	0.444906	0.160068	0	0	0	0.197889	0.152292	0
chr1	31509581	31510087	RP11-201O14.1	ENSG00000237329.2	+	0	0	0	0	0	0	0	0	0	0	0	0	0	0	0	0	0	0
chr1	31523719	31523881	RP11-201O14.2	ENSG00000232768.1	+	0	0	0	0	0	0	0	0	0	0	0	0	0	0	0	0	0	0
chr1	31567834	31568405	SEPW1P	ENSG00000215900.4	-	0	0	0	0	0	0	0	0	0	0	0	0	0	0	0	0	0	0
chr1	31581035	31581470	RP11-490K7.1	ENSG00000225142.2	-	0	0	0	0	0	0.004238	0	0	0	0	0	0	0	0	0	0	0	0
chr1	31652592	31712401	NKAIN1	ENSG00000084628.5	-	42.6179	39.2855	38.4367	46.4713	43.5886	43.9549	16.6717	13.954	17.8217	14.7558	15.1558	15.1313	15.7841	9.96182	11.2024	10.6211	12.0309	11.361
chr1	31732417	31769662	SNRNP40	ENSG00000060688.8	-	114.674	112.083	116.02	125.079	118.184	113.608	105.015	103.465	109.405	100.3	104.954	108.802	130.53	136.151	130.638	113.807	114.459	113.703
chr1	31736092	31736528	RP11-490K7.4	ENSG00000229447.2	-	2.96245	2.58873	2.44621	1.90652	2.53612	2.44522	1.65502	1.61823	1.61407	1.73713	1.7715	2.92226	2.21251	3.75662	2.5167	2.33847	2.64637	4.77924
chr1	31769842	31837783	ZCCHC17	ENSG00000121766.10	+	52.0513	52.8438	57.2563	59.4911	57.0633	58.0585	57.3511	66.858	66.1361	61.7746	60.3259	66.786	77.4863	83.2804	81.6879	73.7745	83.1511	69.237
chr1	31805914	31819646	RP11-266K22.2	ENSG00000229044.1	-	0	0	0.053205	0	0	0	0	0	0	0	0	0	0	0	0	0	0	0
chr1	31838472	31849697	FABP3	ENSG00000121769.3	-	31.848	31.0049	34.2294	36.6255	40.937	35.7343	6.62967	8.12951	9.74149	7.50592	8.57966	7.53775	8.1928	6.13583	4.97971	6.96824	5.51488	6.36023
chr1	31882412	31907525	SERINC2	ENSG00000168528.7	+	16.6443	14.6693	14.0176	16.1521	15.7437	14.8865	16.7622	14.7765	12.5235	13.3485	11.6297	11.1099	19.7849	15.4753	18.4667	25.3599	22.8479	20.3264
chr1	31902192	31902614	AC114494.1	ENSG00000268950.1	-	0	0	0	0	0	0	0	0	0	0	0	0	0	0	0	0	0	0
chr1	31960436	31961777	RP11-439L8.2	ENSG00000215899.3	-	0.024787	0.006373	0.016859	0.00158	0.005658	0.090936	0.017171	0.002755	0.031498	0.004209	0.005659	0.001246	0.006442	0.015112	0.005975	0	0.017351	0.001965
chr1	31970419	31970525	RNU6-40P	ENSG00000206981.1	-	0	0	0	0	0	0	0	0	0	0	0	0	0	0	0	0	0	0
chr1	31971841	31974167	RP11-439L8.3	ENSG00000228682.2	+	0	0	0	0	0	0	0	0.142612	0	0.183154	0	0.075755	0.09944	0.059987	0	0.190083	0.157207	0.264568
chr1	31984036	31989846	RP11-439L8.4	ENSG00000223907.1	+	0	0	0	0	0	0	0.03635	0.074363	0	0.071318	0.114982	0.060947	0.131858	0	0.049722	0.273714	0.202893	0.192569
chr1	32037186	32041174	RP11-73M7.1	ENSG00000229167.1	-	0	0	0	0	0	0	0	0	0	0	0	0	0	0	0	0	0	0
chr1	32042116	32053288	TINAGL1	ENSG00000142910.11	+	8.20028	6.65671	6.72745	9.40883	8.95203	7.34263	2.65235	2.51033	3.33395	3.28769	2.57673	2.88068	3.35759	4.05834	3.0172	6.04901	5.99602	6.57937
chr1	32083287	32098119	HCRTR1	ENSG00000121764.7	+	0.055084	0	0	0	0	0	0	0	0.027887	0	0	0.016133	0	0	0	0.105698	0	0
chr1	32095463	32110497	PEF1	ENSG00000162517.8	-	31.663	31.9394	30.8609	29.9147	30.9017	29.3049	48.191	51.4228	45.4364	46.6849	44.7788	39.3888	57.3673	60.6676	58.1064	55.2409	55.4726	49.9448
chr1	32109650	32125539	RP11-73M7.6	ENSG00000235790.3	+	0.163606	0.318105	0.235121	0.675646	0.161957	0.035138	0	0	0	0	0	0.099294	0	0.078684	0	0	0	0
chr1	32110295	32114972	RP11-73M7.9	ENSG00000264078.1	+	0	0.201004	0.195718	0	0	0	0	0	0	0	0	0	0	0	0	0	0.25323	0
chr1	32117848	32169920	COL16A1	ENSG00000084636.13	-	5.2318	5.7801	4.72947	6.21727	5.46548	6.17744	5.16695	3.65538	4.97272	4.28245	3.44835	3.85888	4.12621	3.20464	4.24669	3.90897	4.54574	3.90818
chr1	32192718	32230494	BAI2	ENSG00000121753.8	-	13.1308	11.6889	9.98869	15.5858	14.2026	13.2927	11.5062	9.59688	10.6426	8.37821	7.47987	8.1714	10.6452	11.2767	13.2475	8.80597	7.97114	8.23494
chr1	32224261	32224336	MIR4254	ENSG00000266580.1	-	0.262435	0.20056	0.542765	0	0.279181	0.340385	0	0	0	0.433175	0.070161	0.169385	0.236183	0	0	0	0	0.164333
chr1	32254731	32256923	RP11-84A19.3	ENSG00000254545.1	+	0	0	0	0	0	0	0	0	0	0	0	0	0	0	0	0	0	0
chr1	32256023	32281652	SPOCD1	ENSG00000134668.8	-	1.31867	1.48511	0.976782	1.62498	0.948942	1.07517	2.18048	2.37528	1.60688	1.99611	1.7574	1.99332	2.46055	1.41993	1.96844	1.75616	1.65281	2.09694
chr1	32307620	32321169	RP11-84A19.2	ENSG00000203620.2	-	0	0	0	0	0	0	0	0	0	0	0	0	0	0.036492	0	0	0	0
chr1	32317514	32387442	RP11-84A19.4	ENSG00000269967.1	-	0.054991	0.186759	0.28595	0.231883	0.029105	0.386739	0.096801	0.304176	0.149251	0.043621	0.260542	0.179831	0.283063	0.78686	0.067225	0.279821	0.296263	0.331914
chr1	32372022	32410457	PTP4A2	ENSG00000184007.13	-	131.571	139.317	134.387	134.315	135.85	137.384	162.203	171.502	170.514	161.621	168.83	176.853	142.463	162.609	150.912	118.406	118.407	114.439
chr1	32379174	32380745	AL136115.1	ENSG00000212673.1	+	0	0	0	0	0	0	0	0	0	0	0	0	0	0	0	0	0	0
chr1	32398621	32399576	RP4-534N18.2	ENSG00000228634.1	+	0	0	0	0	0	0	0.053688	0	0	0	0	0	0	0	0	0	0	0
chr1	32479430	32526451	KHDRBS1	ENSG00000121774.13	+	321.571	319.704	302.733	318.281	319.565	321.663	317.493	296.818	327.073	292.944	302.555	341.267	289.986	254.515	275.693	282.526	258.38	283.113
chr1	32517892	32539075	RP11-277A4.4	ENSG00000203325.3	-	0	0	0	0	0	0	0	0	0	0	0	0	0	0	0	0	0	0
chr1	32537632	32568467	TMEM39B	ENSG00000121775.13	+	18.9058	19.239	17.0068	18.2866	16.0952	18.6014	16.8792	15.4993	15.1975	15.47	13.164	14.1504	13.8537	14.8831	15.0972	14.5554	15.378	12.6243
chr1	32552550	32552608	MIR5585	ENSG00000266203.1	+	0	0	0	0	0	0	0	0.079544	0	0	0.484749	0.19805	0	0	0	0	0	0
chr1	32573639	32642169	KPNA6	ENSG00000025800.9	+	52.856	48.634	47.1759	54.665	52.0985	50.5848	49.2459	48.0068	48.709	47.5309	45.4308	48.5727	55.6447	53.3029	52.5832	56.8437	55.8962	58.3606
chr1	32636334	32642169	RP4-622L5.2	ENSG00000250135.1	+	0.012448	0	0.03323	0	0.013087	0.009199	0	0	0	0	0	0.013322	0.0216	0.017183	0	0.004066	0	0
chr1	32645287	32663886	TXLNA	ENSG00000084652.11	+	31.5334	28.0267	25.8638	32.5935	33.4175	31.5244	24.2653	21.3652	24.0452	21.0483	20.165	24.0561	30.1582	26.0053	28.6976	29.4484	24.5034	29.2375
chr1	32665987	32670988	CCDC28B	ENSG00000160050.10	+	14.5063	11.6933	14.271	13.3863	13.6179	12.2354	11.9304	12.188	11.1791	11.8877	11.8096	12.5327	7.69192	7.40899	8.51156	9.05084	10.1442	7.83325
chr1	32670370	32672415	RP4-622L5.7	ENSG00000224066.1	-	0.197646	0.076271	0.033655	0	0.075294	0	0.301857	0.483884	0.103126	0.218449	0.212597	0.220512	0.993464	0.231296	0.650122	0.288987	0.357076	0.616462
chr1	32671236	32674288	IQCC	ENSG00000160051.7	+	2.8262	2.73715	2.51993	3.54214	3.04199	2.20019	3.51379	3.3022	4.21865	3.04757	2.85655	3.37539	4.89298	5.19787	5.98445	3.47088	4.46116	4.70813
chr1	32674695	32681797	DCDC2B	ENSG00000222046.2	+	0.00304	0	0	0	0	0.066654	0.033821	0.040685	0	0.031911	0	0.054261	0.103377	0	0	0	0	0
chr1	32680073	32687972	TMEM234	ENSG00000160055.15	-	3.00374	3.396	3.09746	4.36202	4.3528	3.77641	7.14377	7.34858	7.53605	7.65988	5.27366	5.64552	15.2068	11.1981	13.5813	14.0541	11.4619	15.2314
chr1	32687529	32697205	EIF3I	ENSG00000084623.7	+	203.41	208.982	202.01	236.513	236.625	223.44	195.986	212.276	211.431	202.115	208.979	188.399	209.517	222.293	212.974	212.429	227.282	202.813
chr1	32697259	32707221	MTMR9LP	ENSG00000220785.3	-	8.35802	7.17908	6.39132	7.40653	6.15731	5.86223	4.5502	3.46255	4.47508	3.7173	3.60094	3.53487	5.76395	4.53081	5.04866	8.3917	5.69659	6.90744
chr1	32712834	32714457	FAM167B	ENSG00000183615.5	+	3.57034	3.18293	3.45673	3.04583	2.84564	4.04362	2.35837	1.26193	2.12062	1.49655	1.4672	2.12841	2.93282	1.61129	1.86165	3.87641	2.03699	2.6383
chr1	32716840	32751766	LCK	ENSG00000182866.12	+	76.3006	71.8857	70.6202	68.842	70.3838	73.2968	17.9979	18.2492	19.7193	21.2058	18.762	19.9227	8.55292	5.62143	6.97864	10.2779	10.7402	9.81673
chr1	32752053	32752162	Y_RNA	ENSG00000252450.1	-	0	0	0	0	0	0	0	0	0	0	0	0	0	0	0	0	0	0
chr1	32757687	32799236	HDAC1	ENSG00000116478.7	+	108.981	108.359	103.943	117.657	112.106	113.079	145.448	146.728	139.001	135.366	136.94	141.354	171.58	183.856	179.628	169.444	166.1	172.473
chr1	32799433	32801980	MARCKSL1	ENSG00000175130.6	-	495.803	478.038	449.554	555.752	551.133	523.389	699.528	647.785	636.053	597.508	586.965	561.324	742.38	692.549	752.366	821.468	734.305	751.755
chr1	32814795	32816264	RP4-811H24.9	ENSG00000233775.1	-	0.152036	0	0	0	0	0	0	0	0	0.047607	0	0.157403	0.373912	0.198806	0	0.293606	0.294558	0
chr1	32817122	32829913	TSSK3	ENSG00000162526.6	+	1.85778	0.566033	0.568071	0.7027	0.920625	0.820581	1.58548	0.674087	0.328871	0.908229	0.398647	1.47771	1.43025	0.366991	1.85976	1.27078	1.52496	2.86477
chr1	32826871	32829879	FAM229A	ENSG00000225828.1	-	4.88244	3.03948	3.53078	3.93032	4.50854	3.0281	3.845	2.67174	2.86797	2.86345	2.81813	3.95282	4.33716	2.29629	3.06859	5.17483	3.5747	3.53683
chr1	32830704	32860332	BSDC1	ENSG00000160058.14	-	26.408	25.2627	23.7259	23.6975	26.4425	24.1041	51.5064	39.0956	43.5657	45.4567	37.796	39.3545	45.9939	48.8726	41.6607	49.9766	43.678	50.0444
chr1	32867710	32868716	GAPDHP20	ENSG00000224333.1	-	0	0	0	0	0	0	0.711974	0.503968	0.382086	0.738037	0.224082	0.486571	0.222814	0.165222	0.093613	0.189147	0.247612	0.109762
chr1	32887580	32887920	RP11-395N6.4	ENSG00000270850.1	+	0	0	0	0.224122	0	0.092893	0	0	0	0.074458	0	0	0	0	0.16394	0.313802	0.379582	0
chr1	32888815	32892390	LRRC37A12P	ENSG00000229259.1	-	0.306441	0.261749	0.193588	0.207684	0.197066	0.382254	10.2683	9.46866	8.25593	9.76278	8.65442	9.13847	3.729	3.20634	3.26267	4.26035	3.13346	2.51468
chr1	32923436	32923733	RN7SL122P	ENSG00000263529.1	+	0	0	0	0	0	0	0.364663	0.266296	0.364216	0.184846	0.514029	0.63735	0	0	0.443853	0	0.160773	0.163451
chr1	32930658	33066393	RP1-27O5.3	ENSG00000254553.1	+	0	0	0.084818	0	0.21183	0	0.761557	2.14407	0	2.10233	0	0.066846	1.83305	0.850048	5.61914	0.377235	3.37527	0.108379
chr1	32930670	32962287	ZBTB8B	ENSG00000273274.1	+	3.5688	2.66822	2.59183	3.64588	3.09244	3.43093	4.73721	3.82148	4.30773	4.54402	3.38786	5.18885	4.61457	3.31456	3.59844	5.47593	3.66708	5.80851
chr1	33005028	33071540	ZBTB8A	ENSG00000160062.10	+	11.3567	10.2809	10.9972	12.4534	11.3311	10.6979	15.7711	14.5742	16.1499	13.476	12.9253	17.4571	22.696	16.9731	19.4965	14.0314	10.5989	16.9626
chr1	33065773	33116504	ZBTB8OS	ENSG00000176261.11	-	42.1923	43.1706	45.7708	49.0977	49.1504	52.2093	65.6828	65.3554	62.8799	66.0596	67.1088	68.3182	59.4141	63.7647	62.5877	54.081	48.9664	50.0982
chr1	33105552	33105653	Y_RNA	ENSG00000200591.1	+	0	0	0	0	0	0	0	0	0	0	0	0	0	0	0	0	0	0
chr1	33116743	33151812	RBBP4	ENSG00000162521.14	+	143.867	115.653	115.122	122.782	144.769	119.894	166.921	157.909	164.508	154.494	148.949	165.876	170.348	168.489	164.424	156.101	220.493	153.44
chr1	33145507	33169197	SYNC	ENSG00000162520.10	-	0.087116	0.022052	0.053926	0.062606	0.040105	0.047581	0.120289	0.152053	0.101299	0.148546	0.218065	0.100923	0.166795	0.113261	0.125349	0.085803	0.176157	0.230938
chr1	33183335	33190838	RP11-114B7.6	ENSG00000224409.1	-	0	0	0	0	0	0	0	0	0	0	0	0	0	0	0	0	0	0
chr1	33207486	33240571	KIAA1522	ENSG00000162522.6	+	54.3819	48.4559	43.8296	50.4624	50.5477	48.9335	25.1537	19.7076	22.4314	19.0154	17.1835	19.5611	39.7517	28.3285	40.5475	45.4542	33.9723	40.4067
chr1	33240840	33283754	YARS	ENSG00000134684.6	-	125.581	119.974	117.428	137.514	135.505	132.294	155.532	151.822	155.882	156.944	154.489	158.528	109.347	102.289	99.3782	131.715	123.581	121.449
chr1	33282368	33324476	S100PBP	ENSG00000116497.13	+	36.0387	33.0601	29.4138	50.766	38.3244	36.4628	54.8952	53.9618	50.5455	49.3894	45.2768	59.6617	57.9179	52.0945	51.7146	68.7669	57.7311	62.0149
chr1	33327869	33338083	FNDC5	ENSG00000160097.11	-	0.729529	0.701074	0.463353	0.718039	0.636242	0.91545	0.988124	1.1035	0.865519	1.53892	1.80319	0.768926	5.063	6.37191	6.32176	3.51913	3.34779	3.06208
chr1	33351595	33364042	HPCA	ENSG00000121905.5	+	2.87554	1.06732	1.91128	1.23731	1.91056	2.51209	0.348465	0.382549	0.24244	0.576499	0.208351	0.622605	0.245508	0.219217	0.432396	0.248091	0.29111	0.213548
chr1	33360195	33367039	TMEM54	ENSG00000121900.14	-	7.498	8.63128	5.84611	4.5517	7.92396	6.13873	3.6662	3.59148	3.16191	4.17411	4.51785	2.76461	7.12465	8.10999	9.4002	7.44798	6.29083	7.30948
chr1	33391895	33392000	AL031602.1	ENSG00000221423.1	+	0	0	0	0	0	0	0	0	0	0	0	0	0	0	0	0	0	0
chr1	33402046	33430286	RNF19B	ENSG00000116514.12	-	15.4152	15.4475	14.5031	16.0697	14.2636	14.6262	11.5906	10.7763	12.4492	11.5519	10.293	11.3657	15.3559	15.3033	13.0627	13.4526	15.3685	15.3612
chr1	33439268	33439642	FKSG48	ENSG00000267885.1	+	0	0	0	0.059132	0	0	0	0.04238	0.282768	0	0	0	0	0	0	0	0	0
chr1	33445543	33446073	RP4-803A2.1	ENSG00000217644.4	+	0	0	0	0	0	0	0	0	0	0	0	0	0	0	0	0	0	0
chr1	33452553	33453834	RP4-803A2.2	ENSG00000239670.1	+	0	0	0	0	0	0	0	0	0	0	0	0	0	0	0	0	0	0
chr1	33452676	33498070	RP1-117O3.2	ENSG00000236065.2	+	0	0	0	0	0	0	0	0	0	0	0	0	0	0	0	0	0	0
chr1	33473585	33546597	AK2	ENSG00000004455.12	-	154.404	153.102	145.711	139.917	149.033	152.063	61.2146	64.7533	64.9011	55.6591	61.1466	64.0197	74.0295	67.9715	71.6001	67.3981	60.4984	66.222
chr1	33546705	33586131	ADC	ENSG00000142920.12	+	0.278935	0.315087	0.232917	0.211702	0.127797	0.539761	1.1108	1.10426	0.446066	0.480069	0.541688	0.3799	1.15015	0.711249	1.10512	0.233878	0.745487	0.273851
chr1	33611003	33647660	TRIM62	ENSG00000116525.9	-	4.3003	3.66261	3.57784	5.49431	5.16509	4.67596	4.75637	2.97154	4.48494	3.11764	2.55442	3.48493	5.27008	4.22696	4.4969	5.78011	5.64438	4.85614
chr1	33722146	33766320	ZNF362	ENSG00000160094.10	+	18.2539	17.3717	14.6881	18.048	16.6017	19.4592	28.4737	21.6953	22.6079	21.344	19.2856	21.7761	27.8486	22.2859	25.9085	25.4278	23.6366	23.8414
chr1	33726813	33727281	RP11-415J8.7	ENSG00000270115.1	+	0.336297	0.271819	0.489836	0.599481	0.563449	0.234704	2.00886	1.28767	1.52595	1.39105	1.68422	2.41503	1.18749	1.33429	1.38051	1.44767	0.941964	1.30219
chr1	33764975	33766320	AL513327.1	ENSG00000256142.1	+	0.006865	0.004878	0.008631	0.010087	0.008213	0.008729	0.00958	0.00841	0.013563	0.009389	0.008706	0.009181	0.010042	0.00619	0.01202	0.010641	0.008395	0.010979
chr1	33772367	33786699	A3GALT2	ENSG00000184389.8	-	0	0	0	0	0	0	0	0	0.054632	0	0	0	0	0	0.182155	0	0	0
chr1	33772967	33791644	RP11-415J8.3	ENSG00000225313.2	+	0	0	0	0	0	0	0	0	0	0	0	0	0	0	0	0	0	0
chr1	33789224	33896653	PHC2	ENSG00000134686.12	-	6.6793	4.86695	5.80661	6.26088	5.306	4.48548	17.5306	15.784	16.3324	16.5467	15.7263	14.0063	29.483	31.0297	32.064	49.0406	42.7671	49.7919
chr1	33797994	33798093	MIR3605	ENSG00000266239.1	-	0.257281	0.002776	0.138452	0.0028	7e-06	8e-06	0.007865	0.772603	0.058618	0.01292	0.218278	0.073303	1.11137	0.364357	1.11492	2.56161	0.513766	1.05273
chr1	33802167	33802465	RN7SKP16	ENSG00000222112.1	-	0.426566	0.046344	0.05944	0.093286	0	0	0.269737	0	0	0.456251	0.13132	0.079485	0.231208	0.020071	0.556016	0.559189	0.362079	0.933567
chr1	33815953	33828846	RP11-415J8.5	ENSG00000233246.1	+	0	0	0	0	0	0	0.275215	0	0.407702	0.201998	0	0	0.519784	0	0.186419	0.362511	0.098317	0
chr1	33907626	33907712	AL138837.1	ENSG00000221225.1	-	0	0	0	0	0	0	0	0	0	0	0	0	0	0	0	0	0	0
chr1	33931850	33934555	TLR12P	ENSG00000234512.1	+	0	0	0	0	0	0	0	0	0	0	0	0	0	0	0	0	0	0
chr1	33938246	33962107	ZSCAN20	ENSG00000121903.10	+	2.4144	2.58292	2.26824	2.20764	2.33679	2.6991	3.42726	2.91703	2.82692	2.9429	2.66859	2.72552	3.68575	4.25126	3.85441	3.65391	3.78751	3.88298
chr1	33977608	33978343	RP4-580O19.2	ENSG00000235907.2	-	0	0	0	0	0	0	0	0	0	0	0	0.086378	0	0	0.07397	0	0	0
chr1	33979609	34631443	CSMD2	ENSG00000121904.13	-	5.9821	4.85086	4.31707	7.10719	5.95152	5.70607	3.76148	2.5192	4.25064	3.31704	2.16157	3.85962	1.53218	1.03079	1.39976	2.93293	2.41811	2.58078
chr1	34304124	34305741	HSPD1P14	ENSG00000227000.2	+	0	0	0	0	0	0	0	0	0	0	0	0	0	0	0	0	0	0
chr1	34326076	34330392	HMGB4	ENSG00000176256.6	+	0	0	0	0	0	0	0	0	0.132864	0	0.077999	0	0	0	0	0	0	0
chr1	34334554	34351059	RP5-1007G16.1	ENSG00000231163.1	+	0	0	0	0	0	0	0	0	0	0	0	0	0	0	0	0	0	0
chr1	34578550	34578664	RNA5SP42	ENSG00000201148.1	+	0	0	0	0	0	0	0	0	0	0	0	0	0	0	0	0	0	0
chr1	34632484	34684732	C1orf94	ENSG00000142698.10	+	10.0835	10.8703	9.19666	11.8585	12.6474	11.3654	4.5693	4.44234	4.20027	4.55565	4.03932	4.66066	0.999113	0.574842	0.44739	1.28754	1.09995	1.10547
chr1	34641467	34641550	AC115286.1	ENSG00000221053.1	-	0	0	0	0	0	0	0	0	0	0	0	0	0	0	0	0	0	0
chr1	34742460	34742893	RP4-657M3.2	ENSG00000270241.1	-	0	0	0	0	0	0	0	0	0	0	0	0	0	0	0	0	0	0
chr1	35135200	35135295	MIR552	ENSG00000207941.1	-	0	0	0	0	0	0	0	0	0	0	0	0	0	0	0	0	0	0
chr1	35178338	35325417	SMIM12	ENSG00000163866.8	-	11.6214	15.1268	11.8643	17.5027	16.1256	10.5407	18.0009	21.3514	21.3716	25.3594	19.1036	16.9752	26.1787	30.9934	29.4742	30.6193	28.0909	29.9047
chr1	35220648	35224113	GJB5	ENSG00000189280.3	+	0.503177	0.265479	0.604162	0.293952	0.680042	0.945624	0.39056	0.080291	0.193148	0.133391	0.121813	0.10436	0.573745	0.158984	0.534455	0.079169	0.407303	0.128811
chr1	35225342	35229325	GJB4	ENSG00000189433.5	+	0.089449	0	0.0761	0.044785	0.103721	0.125665	0.102898	0.079996	0.015621	0.081599	0.159848	0.035077	0.547311	0.566239	0.508635	0.581941	0.366434	0.354451
chr1	35227027	35253698	RP1-34M23.5	ENSG00000255811.1	-	0	0	0	0	0	0	0	0	0	0	0	0	0	0	0.802232	0	0.302255	0
chr1	35244162	35244245	AL121988.1	ENSG00000216162.1	-	0	0	0	0	0	0	0	0	0	0	0	0.160327	0	0	0	0	0	0
chr1	35246790	35251970	GJB3	ENSG00000188910.7	+	0.628209	0.539149	0.375491	0.379323	0.296685	0.527111	0.393904	0.429629	0.296759	0.522061	0.47163	0.259154	0.543522	0.378314	0.282762	0.47403	0.436029	0.169144
chr1	35258599	35261348	GJA4	ENSG00000187513.8	+	0.707052	1.1757	0.801232	1.07323	1.00929	1.3848	1.87157	1.56705	1.33177	1.59118	1.35906	1.20833	5.58229	5.47049	4.67463	32.058	24.8462	22.4372
chr1	35316295	35317156	RP5-997D16.2	ENSG00000230163.1	+	0.055038	0	0	0	0	0.219977	0	0	0.077116	0	0	0	0	0.057483	0	0	0.338225	0
chr1	35331037	35395186	DLGAP3	ENSG00000116544.7	-	5.92952	5.08781	3.93111	6.43124	5.81182	5.3334	4.35494	3.59984	3.87996	2.94551	2.93747	3.15583	2.50633	2.27499	2.51668	1.98455	1.7447	2.20397
chr1	35409357	35409425	SNORD112	ENSG00000252728.1	+	0	0	0	0	0	0	0	0	0	0	0	0	0	0	0	0	0	0
chr1	35439957	35450914	RP11-244H3.1	ENSG00000241014.1	-	0.779515	0.881151	0.994255	0.677156	1.06043	0.964767	1.79005	1.62062	1.78388	1.47587	1.50164	1.8789	2.5036	2.13973	1.79732	1.98788	1.5685	1.31225
chr1	35447134	35497342	ZMYM6	ENSG00000271741.1	-	3.70673	1.32456	0.309749	2.21535	0.886761	1.60185	4.91808	5.04651	3.7305	3.53477	2.83149	4.06817	3.50425	9.79565	9.22766	4.22242	6.5869	3.30783
chr1	35447136	35450954	ZMYM6NB	ENSG00000243749.1	-	5.06983	9.24063	11.5662	7.85845	13.0491	8.70942	18.9145	19.5081	24.2388	22.3916	24.0941	17.34	30.9802	19.0634	17.6698	18.4109	13.6995	19.7906
chr1	35449523	35497569	ZMYM6	ENSG00000163867.12	-	9.17728	8.68868	8.90879	9.84552	9.42956	10.6791	9.10032	9.18271	10.5438	9.87435	9.94872	11.8921	9.04072	8.39116	9.72746	10.6856	9.54686	11.9712
chr1	35519069	35524872	RP11-248I9.2	ENSG00000233940.1	+	0	0	0	0	0	0	0	0	0	0	0	0	0	0	0	0	0	0
chr1	35525387	35581460	ZMYM1	ENSG00000197056.5	+	22.1111	22.0899	22.5341	24.325	25.5287	24.9196	22.6247	19.6107	25.0214	21.3404	20.405	26.7742	29.0582	26.8857	30.798	31.3717	27.5487	36.0855
chr1	35587623	35588085	EFCAB14P1	ENSG00000228348.1	+	0	0.005986	0.096676	0	0.180331	0	0	0	0.091599	0	0.084805	0	0.034054	0	0.058398	0.032934	0.239829	0
chr1	35641979	35658749	SFPQ	ENSG00000116560.6	-	245.486	215.201	216.766	314.107	263.967	287.39	560.979	558.11	570.336	570.631	517.723	678.783	452.823	416.747	435.918	372.155	304.253	314.465
chr1	35661570	35661663	Y_RNA	ENSG00000201868.1	+	0	0	0	0.139463	0	0	0	0	0	0	0	0.619435	0	0	0.291528	0	0	0
chr1	35729823	35730083	RN7SL136P	ENSG00000263591.1	-	0	0	0	0	0	0	0	0	0	0.235782	0	0.019729	0.1329	0	0.386381	0	0	0
chr1	35734568	35887659	ZMYM4	ENSG00000146463.7	+	64.3401	62.6489	63.0075	65.0738	64.3648	68.1733	111.946	110.666	109.416	111.526	111.213	115.274	111.113	122.529	109.389	94.4655	97.901	97.388
chr1	35757801	35758099	RN7SL503P	ENSG00000240374.2	-	0	0	0	0	0	0	0	0	0	0	0	0	0	0	0	0	0	0
chr1	35775875	35776026	SNORA62	ENSG00000201542.1	+	0	0	0	0	0	0	0	0	0	0	0	0	0	0	0	0	0	0.076004
chr1	35816323	35817208	RPL5P4	ENSG00000229994.1	+	6.46939	7.16776	7.30822	7.44215	8.24924	9.7341	7.69634	7.31215	9.66693	8.27116	9.06268	8.24664	7.16122	7.59079	5.8219	7.04814	7.2048	6.37969
chr1	35824423	35831678	ZMYM4-AS1	ENSG00000227409.1	-	0	0	0	0.001238	0	0.003219	0.002878	0.031386	0.003544	0	0.004926	0	0.003891	0	0.007689	0.001945	0	0.003252
chr1	35893417	35893494	RNY5P1	ENSG00000202129.1	-	0	0	0	0	0.190769	0	0	0	0	0.074483	0	0	0.242566	0	0	0.32925	0	0
chr1	35899091	36023551	KIAA0319L	ENSG00000142687.13	-	52.1528	53.0199	47.6602	55.6005	49.5755	52.5211	64.1481	62.6799	58.6284	59.8489	51.6123	54.6814	57.7787	47.2248	53.8149	60.8157	53.0024	59.695
chr1	35975343	35977039	RP4-728D4.3	ENSG00000236274.1	+	0	0	0	0	0	0	0	0	0	0	0	0	0	0	0	0	0	0
chr1	36023074	36032875	NCDN	ENSG00000020129.11	+	14.1262	12.5102	11.9949	18.4504	14.821	14.0834	22.5039	20.9189	20.1913	16.7833	16.1004	15.4999	19.7891	16.4135	17.9702	17.8295	15.0038	16.3154
chr1	36035414	36043330	RP4-728D4.2	ENSG00000239636.1	-	1.21804	0.916727	0.48992	0.348092	1.33814	1.0216	0.502318	0.451673	0.189404	0.356014	0.911311	0.500322	0.345329	0.585399	0.73091	0.748414	0.677232	0.980173
chr1	36038971	36060929	TFAP2E	ENSG00000116819.6	+	0.521964	0.475024	0.289065	0.433204	0.420828	0.267911	0.642141	0.428685	0.372524	0.378314	0.771811	0.553408	0.407016	0.509178	0.289044	1.05439	0.994601	0.703457
chr1	36067185	36107445	PSMB2	ENSG00000126067.7	-	100.599	102.131	102.746	97.4723	103.091	100.2	82.2423	81.0594	82.4179	77.5576	82.127	78.4575	78.6254	82.74	80.4544	80.6944	82.0324	80.1992
chr1	36171626	36171875	RN7SL281P	ENSG00000239859.2	-	0	0	0	0	0	0	0	0	0	0	0.407189	0	0	0	0	0	0	0
chr1	36179476	36185073	C1orf216	ENSG00000142686.7	-	7.25404	6.81156	6.85486	8.83073	7.14439	7.97417	9.55441	7.94217	8.48447	7.78292	7.35838	8.66858	11.2263	8.54035	10.8921	9.95169	8.43975	9.49822
chr1	36185819	36235568	CLSPN	ENSG00000092853.9	-	14.6683	11.8144	12.9516	17.7611	16.5752	17.972	18.0828	18.1373	21.5642	18.1651	16.6565	22.8407	21.4544	20.5273	20.1731	16.0501	14.2429	15.8324
chr1	36204990	36209177	RP11-435D7.3	ENSG00000232335.1	+	0	0	0	0.081779	0	0	0	0	0	0	0	0	0	0	0	0	0	0
chr1	36273773	36323491	AGO4	ENSG00000134698.10	+	7.25287	7.04282	6.6197	7.83333	8.12243	8.12818	16.5079	14.7482	16.8163	16.6408	14.8846	17.4518	15.8528	14.6958	15.9275	19.4629	19.0749	21.9351
chr1	36335409	36395211	AGO1	ENSG00000092847.6	+	23.524	20.2285	19.4778	28.789	24.5765	25.4039	29.8917	27.1546	32.017	29.4091	25.5791	32.9406	28.5089	24.33	25.8781	36.463	31.3551	33.2388
chr1	36338871	36339353	RP4-789D17.4	ENSG00000271164.1	-	0	0	0	0	0	0	0	0	0	0	0	0	0	0	0	0	0	0
chr1	36395321	36395716	RP4-789D17.5	ENSG00000271914.1	-	0.6203	0.237946	0.175089	0.150732	0.100898	0.613935	0.456262	0.192853	0.884249	0.830259	0.368458	0.873723	0.091269	0.503237	0.35431	0.420865	0	0.134828
chr1	36396319	36538101	AGO3	ENSG00000126070.14	+	6.93646	6.27952	6.10984	7.25285	6.49364	7.36589	8.05625	6.48801	6.69117	6.26405	5.69554	7.886	8.34063	7.2437	8.34936	8.69979	7.40775	8.52487
chr1	36457710	36479231	RP4-665N4.8	ENSG00000271554.1	-	0	0	0	0	0	0	0	0	0	0	0	0	0	0	0	0	0	0
chr1	36545667	36547923	RP4-665N4.4	ENSG00000232862.4	-	0	0	0	0	0	0.036451	0.289611	0.56483	0.139641	0.086979	0.160593	0.031759	0.379675	0.53463	0.397526	0.250238	0.044509	0
chr1	36549676	36553876	TEKT2	ENSG00000092850.7	+	1.13046	1.00405	0.788105	0.945917	1.15039	1.1749	2.76634	2.50178	1.79319	1.94951	1.8728	1.80391	4.2445	3.50678	3.81803	2.02768	2.35232	2.30608
chr1	36554476	36559533	ADPRHL2	ENSG00000116863.10	+	22.988	26.5236	22.7319	24.7523	26.9033	24.0332	17.9314	16.9149	16.821	17.3683	15.101	14.1598	21.9066	20.5682	23.0674	22.6892	21.6266	21.2667
chr1	36560837	36590821	COL8A2	ENSG00000171812.6	-	2.19461	2.59601	2.57284	2.47242	2.35504	2.30026	1.30436	1.3659	1.41582	1.62463	1.60157	1.38142	0.613401	0.464868	0.442365	0.578416	1.00477	0.487216
chr1	36602173	36615098	TRAPPC3	ENSG00000054116.7	-	45.2256	45.808	48.3312	50.4453	46.5783	44.5552	69.0946	65.9179	62.3979	67.6041	63.5384	58.3657	89.4653	92.1943	84.7951	87.0053	82.1797	83.9031
chr1	36621180	36646450	MAP7D1	ENSG00000116871.11	+	25.9466	21.9644	19.8057	26.9236	25.6177	26.2305	77.3738	65.1794	68.7451	66.7615	59.8186	66.9183	85.9982	67.8507	78.9246	103.735	84.4082	98.5633
chr1	36657516	36657769	RN7SL131P	ENSG00000264592.1	+	0	0	0	0	0	0	0	0	0	0	0	0	0	0	0	0	0	0
chr1	36690017	36770958	THRAP3	ENSG00000054118.9	+	158.584	172.282	169.32	167.878	162.869	161.165	136.324	138.557	143.917	135.673	135.442	141.328	162.036	170.596	167.855	150.769	156.963	160.922
chr1	36707499	36707757	UBE2V2P4	ENSG00000231849.1	-	0	0	0	0	0	0	0	0	0	0	0	0	0	0	0	0	0	0
chr1	36771988	36790484	SH3D21	ENSG00000214193.5	+	21.9388	18.8483	17.5482	21.9508	21.6058	20.5458	9.26391	8.69676	8.5017	9.47085	5.62778	6.8129	8.83255	6.3597	7.77104	12.3684	9.08458	10.6852
chr1	36787632	36789755	EVA1B	ENSG00000142694.6	-	7.84867	8.35178	5.73461	4.92057	5.05344	5.3371	8.57004	7.7155	7.00516	5.92517	7.19922	6.85272	9.6308	9.14928	6.27004	9.95469	12.3485	11.1394
chr1	36789335	36794822	RP11-268J15.5	ENSG00000116883.8	+	9.97381	9.80541	8.74799	11.3279	9.37607	12.0951	3.68248	2.70173	3.32161	3.54881	2.79363	3.33804	3.31091	2.47674	3.00415	4.41164	4.2518	3.9737
chr1	36805225	36851497	STK40	ENSG00000196182.6	-	9.26583	8.07477	7.64698	11.7954	10.9875	10.5476	21.0474	19.8668	18.781	19.9261	19.5947	18.5239	15.8508	12.6346	14.7564	16.3537	13.9884	16.0196
chr1	36856839	36863493	LSM10	ENSG00000181817.5	-	32.1985	31.753	27.0441	31.0081	34.3438	33.6695	34.7747	37.4186	32.3032	36.8617	37.8419	33.7553	38.2862	35.3112	32.8212	35.2507	37.3795	31.1946
chr1	36868322	36868460	RNU4-27P	ENSG00000222821.1	-	0	0	0	0	0	0	0	0	0	0	0	0	0	0	0	0	0	0
chr1	36881428	36916086	OSCP1	ENSG00000116885.14	-	1.96449	2.08016	1.59253	1.43641	2.00831	2.07576	11.5341	9.8326	8.47883	8.28921	9.16365	10.5156	13.137	13.4833	12.0818	8.78806	8.57591	7.71821
chr1	36884051	36884179	SNORA63	ENSG00000201448.1	-	0	0	0.147978	0	0	0.198491	0.014209	0	0.467186	0	0.375774	0.023029	0.1053	0.901546	0.390873	0	0.201088	0.212996
chr1	36921319	36930038	MRPS15	ENSG00000116898.7	-	118.658	122.458	122.393	117.419	121.543	119.751	129.2	132.46	131.851	135.291	143.564	129.598	120.693	127.997	124.46	115.173	110.833	105.931
chr1	36931644	36948879	CSF3R	ENSG00000119535.13	-	0.050903	0	0	0	0.001361	0	2.41967	1.66957	2.46188	1.59925	1.05205	1.09711	0.359461	0.246694	0.100399	0.075805	0.203142	0.095665
chr1	37095936	37096458	FTLP18	ENSG00000230214.1	+	0	0	0	0	0	0	0	0	0	0	0	0.075736	0	0	0	0	0	0
chr1	37238741	37241369	RP4-614N24.1	ENSG00000234481.1	+	0	0	0	0	0	0	0	0	0	0	0	0	0.288145	0.418347	0	0	0	0
chr1	37261128	37499730	GRIK3	ENSG00000163873.5	-	0.574408	0.438407	0.401197	0.611686	0.521932	0.676884	2.38953	2.15167	1.57215	1.3835	1.1241	1.3678	7.67485	8.6341	10.4026	0.17479	0.169237	0.17394
chr1	37627164	37627235	MIR4255	ENSG00000264698.1	+	0	0	0	0	0	0	0	0	0	0	0	0	0	0	0	0	0	0
chr1	37669211	37669317	RNU6-636P	ENSG00000207328.1	+	0	0	0	0	0	0	0	0	0	0	0	0	0	0	0	0	0	0
chr1	37728340	37790701	RP5-1180C18.1	ENSG00000223944.1	-	0	0	0	0	0	0	0	0	0	0	0	0	0	0	0	0	0	0
chr1	37730278	37730387	RNA5SP43	ENSG00000252368.1	-	0	0	0	0	0	0	0	0	0	0	0	0	0	0	0	0	0	0
chr1	37796453	37796597	RPS29P6	ENSG00000230451.2	+	0	0	0	0	0	0	0	0	0	0	0	0	0	0	0	0	0	0
chr1	37920480	37940012	RP11-422J8.1	ENSG00000233621.1	-	0.173263	0	0.36931	0.180552	0.23842	0.159329	0.368661	0.60174	0.425821	0.365407	0.627915	0.211254	0.536949	0.300692	0.413052	0.148237	0.170963	0.402882
chr1	37940153	37949980	ZC3H12A	ENSG00000163874.8	+	4.26822	3.67884	3.4292	4.78032	3.97406	3.96805	4.5993	4.69256	4.25049	4.22792	3.06701	4.78119	5.72768	3.98695	5.09509	5.32549	4.78089	5.58758
chr1	37958176	37980375	MEAF6	ENSG00000163875.11	-	40.7512	41.5596	42.0525	44.6426	42.8844	44.2281	66.4192	69.9259	70.621	60.9111	67.7151	69.7517	65.2528	70.0818	69.1496	64.8504	61.4253	64.4949
chr1	37966536	37966595	MIR5581	ENSG00000263675.1	-	0.393652	2.21248	0.793553	0.22314	0.477629	2.28776	2.06429	2.10479	1.68803	2.07641	1.50272	1.05627	2.94313	1.0071	0.791661	0.838217	1.01909	1.55076
chr1	38000050	38019903	SNIP1	ENSG00000163877.9	-	10.3882	11.0367	10.2205	10.5952	10.5172	10.2269	10.8117	11.1959	11.3749	10.6516	10.6491	11.8901	12.6031	13.6277	13.4292	11.9295	10.7517	12.1507
chr1	38010364	38010895	FTH1P1	ENSG00000232273.1	+	0	0	0.020622	0.194222	0.021064	0.096316	0.197813	0.024078	0.052446	0.032528	0.068177	0.00455	0.022291	0.009681	0.074175	0	0.005971	0.012794
chr1	38021843	38022108	RP3-423B22.5	ENSG00000237749.3	+	2.93331	3.81215	4.91189	4.39068	2.33415	7.63168	3.41135	2.90278	3.25708	3.8547	6.0395	3.81523	3.58283	2.44025	3.86146	2.57411	3.53558	2.31623
chr1	38022520	38032458	DNALI1	ENSG00000163879.9	+	10.8217	8.43502	9.4845	9.03537	10.4515	8.51716	25.5977	24.5445	19.8424	17.7294	23.0463	17.0377	31.6963	35.3899	31.0268	28.8832	27.9639	27.9344
chr1	38032417	38061536	GNL2	ENSG00000134697.8	-	108.67	106.989	116.482	105.869	109.918	105.25	73.8041	75.3379	80.5141	78.9329	80.8547	86.2981	97.082	102.698	97.5523	88.6439	95.5905	89.1106
chr1	38076951	38100595	RSPO1	ENSG00000169218.9	-	0.078379	0	0.170185	0.12009	0.06862	0.233999	0.017545	0	0	0	0	0	0	0	0	0	0.067355	0.093136
chr1	38147242	38157914	C1orf109	ENSG00000116922.10	-	30.1953	27.6235	24.7218	31.5499	31.8604	33.0109	17.7731	21.1199	17.1347	20.9646	17.2001	19.3785	30.9349	36.7183	29.3423	26.4571	34.785	26.4825
chr1	38158090	38175391	CDCA8	ENSG00000134690.6	+	43.9477	43.6661	40.1347	43.2855	42.3705	41.4442	32.2571	31.725	38.3086	39.2269	35.4385	37.5904	47.6537	53.4385	53.1753	53.8082	60.1426	65.7961
chr1	38179552	38230805	EPHA10	ENSG00000183317.12	-	0.797299	0.583694	0.441708	0.700518	0.572733	0.463212	0.090213	0.135138	0.275169	0.092127	0.074483	0.127664	0	0.029105	0	0.279952	0.048402	0.250075
chr1	38203627	38203726	Y_RNA	ENSG00000200421.1	-	0	0	0	0	0	0	0	0	0	0	0	0	0	0	0	0	0	0
chr1	38215874	38215974	snoU13	ENSG00000238871.1	+	0	0	0	0	0	0	0	0	0	0	0	0	0	0	0	0	0	0
chr1	38242342	38245090	ACTN4P2	ENSG00000214141.4	+	0	0	0	0	0	0	0	0	0	0	0	0	0	0	0	0	0	0
chr1	38248129	38248557	RP11-109P14.2	ENSG00000227416.2	-	0	0.007752	0	0	0	0	0	0	0	0	0	0.042472	0	0	0	0	0	0
chr1	38259474	38266809	MANEAL	ENSG00000185090.10	+	3.31251	2.32564	3.7007	2.79805	3.09652	3.02313	6.51951	4.63997	6.51169	6.29902	4.98298	5.2224	7.16079	7.21448	8.19942	5.63602	5.01012	6.00294
chr1	38265392	38266551	RP11-109P14.9	ENSG00000233728.1	-	0	0	0	0	0	0	0	0	0	0	0	0.015103	0.068872	0	0	0	0	0
chr1	38268616	38273857	YRDC	ENSG00000196449.3	-	16.9792	15.054	17.1079	19.6025	18.5059	18.8507	20.8439	17.417	18.4058	18.109	17.183	18.4285	18.2828	18.0608	17.7556	18.9461	19.0473	18.8572
chr1	38272651	38275126	C1orf122	ENSG00000197982.12	+	18.7204	15.093	13.6069	14.1479	14.0386	15.2445	20.337	21.8841	19.73	17.0549	17.854	15.3284	32.1306	31.4279	30.4379	28.9076	28.4393	25.8157
chr1	38275239	38325292	MTF1	ENSG00000188786.9	-	4.11781	4.39491	3.63775	5.03934	4.74023	4.84256	5.15895	4.82987	5.10457	4.95381	4.93468	5.0081	7.19454	7.62319	7.20851	6.29174	6.57093	6.39534
chr1	38292232	38293886	AL929472.1	ENSG00000230610.1	-	0	0	0.068263	0	0	0	0	0	0	0.095632	0.075405	0	0	0.193143	0	0	0	0
chr1	38306658	38307348	RP11-109P14.8	ENSG00000235673.1	+	0	0	0	0	0	0	0	0	0	0	0	0	0	0	0	0	0	0
chr1	38326369	38327252	RP11-109P14.10	ENSG00000230955.1	+	0.007713	0.000594	0.003429	0	0.002813	0.001062	0.006119	0.003222	0.003964	0.002053	0.001474	0.001783	0	0.0029	0	0	0	0.004357
chr1	38326369	38412729	INPP5B	ENSG00000204084.8	-	16.4471	16.9287	15.6967	18.435	18.2083	16.7773	16.1186	15.9242	15.902	16.3069	16.3443	16.5187	17.0547	16.0609	15.2809	18.5084	16.9509	17.7797
chr1	38349909	38349989	SNORA63	ENSG00000252448.1	+	0	0	0	0	0	0	0	0	0	0	0	0	0	0	0	0	0	0
chr1	38350695	38350789	RNU6-584P	ENSG00000222282.1	+	0	0	0	0	0	0	0	0	0	0	0	0	0	0	0	0	0	0
chr1	38422647	38456593	SF3A3	ENSG00000183431.7	-	116.527	117.337	121.819	112.114	124.926	134.164	86.1731	76.9117	79.7526	80.4011	82.3312	86.8066	87.6718	91.2907	79.9396	74.3653	80.2097	72.1311
chr1	38457134	38457241	RNU6-510P	ENSG00000212541.1	+	0.065609	0.431102	0	0.240186	0.204115	0	0.540682	0	0	0.073716	0	0.075186	0	0.720453	0	0	0.294109	0.928027
chr1	38462442	38471278	FHL3	ENSG00000183386.5	-	19.3139	18.6919	17.2453	20.1061	16.4015	16.0306	17.9958	13.7786	17.8402	15.2095	12.572	15.2956	18.0694	11.1584	14.342	19.4491	12.8251	15.5119
chr1	38474930	38490496	UTP11L	ENSG00000183520.7	+	38.7014	39.1647	43.4317	45.1086	46.4026	43.4578	43.714	44.3089	47.8289	43.9247	45.8865	49.0543	47.9572	49.6689	49.577	49.3077	47.1497	46.7287
chr1	38509523	38512450	POU3F1	ENSG00000185668.5	-	41.9198	42.3552	35.9039	38.9806	41.9317	41.7605	0.452612	0.495568	0.581851	0.700264	0.53781	0.801739	0.89877	0.925994	0.847317	0.71968	0.688143	0.684183
chr1	38512986	38584697	RP5-884C9.2	ENSG00000224592.1	+	2.97279	1.79804	1.8395	1.96613	1.78262	1.7106	0.019651	0	0	0.142601	0	0	0.083037	0	0	0	0.394506	0.206401
chr1	38546244	38546583	RP5-884C9.3	ENSG00000223589.2	-	0	0	0	0	0	0	0	0	0	0	0	0	0	0	0	0	0	0
chr1	38554903	38555001	MIR3659	ENSG00000265596.1	+	0.087478	0	0	0	0	0	0	0	0	0	0	0	0	0	0	0	0	0
chr1	38674706	38680439	RP11-214L19.1	ENSG00000237290.1	-	0	0	0.051802	0	0	0	0.017205	0	0	0	0	0	0	0	0	0	0	0
chr1	38862331	38862437	RNU6-753P	ENSG00000200796.1	+	0	0	0	0	0	0	0	0	0	0	0	0	0	0	0	0	0	0
chr1	38940868	38942156	RP11-329N22.1	ENSG00000238063.1	+	0	0	0	0	0	0	0	0	0	0	0	0	0	0	0	0	0	0
chr1	39174603	39176562	RP11-334L9.1	ENSG00000215895.4	+	0.300817	0.241505	0.344553	0.422444	0.466874	0.953867	0.653634	0.688983	1.14329	0.619369	0.84351	0.862497	0.689375	0.718637	0.416461	0.729436	0.646552	0.605616
chr1	39303870	39325495	RRAGC	ENSG00000116954.7	-	15.7375	15.0849	14.06	15.6355	14.5639	15.2201	23.272	21.9467	22.782	24.6278	21.9152	25.4694	31.1299	28.1394	28.8198	36.1254	32.148	36.6615
chr1	39325672	39385068	RP5-864K19.4	ENSG00000228436.2	+	0.607109	0.28228	0.740867	0.840648	0.933856	0.262987	0.705395	0.239042	0.843461	0.270621	0.72527	0.758431	1.41944	1.42336	1.67646	1.06011	0.9838	1.11936
chr1	39328636	39347289	MYCBP	ENSG00000214114.4	-	24.1588	26.1088	24.7286	25.3606	27.5647	28.8583	28.2168	30.5431	32.9018	29.9909	31.3058	32.2474	25.2522	31.4035	24.6795	23.2605	26.0626	21.4636
chr1	39330175	39347289	GJA9	ENSG00000131233.8	-	0	0	0	0.1149	0	0	0	0.061251	0	0	0	0	0	0	0	0	0	0
chr1	39351479	39407471	RHBDL2	ENSG00000158315.6	-	0.141704	0.212352	0.339786	0.466883	0.903048	0.237804	0.067509	0.105509	0.199679	0.244749	0.081597	0.293233	0.15012	0.051472	0.059174	0.184628	0.023856	0.289574
chr1	39392542	39392649	RNU6-605P	ENSG00000199963.1	+	0	0	0	0	0	0	0	0	0	0	0	0	0	0	0	0	0	0
chr1	39416497	39416597	Y_RNA	ENSG00000207466.1	-	0	0	0	0	0	0	0	0	0	0	0	0	0	0	0	0	0	0
chr1	39423947	39424597	RP11-781D11.1	ENSG00000235549.1	-	0	0	0	0	0	0	0	0	0	0	0	0	0	0	0	0	0	0
chr1	39456895	39471731	AKIRIN1	ENSG00000174574.11	+	223.424	230.987	219.677	236.677	214.873	230.824	152.193	164.544	161.052	152.546	152.687	169.937	184.699	178.584	177.619	200.405	236.262	196.374
chr1	39491990	39500308	NDUFS5	ENSG00000168653.6	+	570.934	601.703	594.897	581.333	581.068	616.295	467.679	516.967	504.745	490.897	493.798	501.042	469.826	500.836	476.314	456.172	495.328	468.181
chr1	39546988	39952849	MACF1	ENSG00000127603.19	+	73.4202	65.5524	64.0511	79.3942	73.8798	79.2932	64.955	53.6695	62.7312	55.7083	47.7737	68.3225	60.2425	52.0848	42.3446	55.53	53.8352	61.215
chr1	39586612	39586715	RNU6-608P	ENSG00000206654.1	-	0	0	0	0	0	0	0	0	0	0	0	0	0	0	0	0	0	0
chr1	39619836	39619968	RNA5SP44	ENSG00000222378.1	-	0	0	0	0	0	0	0	0	0	0	0	0	0	0	0	0	0	0
chr1	39672184	39672629	RP11-416A14.1	ENSG00000270040.1	+	0.203593	0	0	0	0	0	0	0	0	0	0	0	0.264321	0	0	0	0	0.333936
chr1	39715510	39723321	RP11-420K8.1	ENSG00000226438.1	-	0	0	0	0	0	0	0	0	0	0	0.016511	0	0	0	0	0	0	0
chr1	39769966	39770570	RP11-420K8.2	ENSG00000217897.2	-	0	0.011525	0.227034	0.217264	0.095679	0.047143	0	0	0	0	0	0	0.084224	0	0	0	0	0.026742
chr1	39876151	39882154	KIAA0754	ENSG00000255103.1	+	16.1524	13.0212	11.7635	17.6817	15.6516	16.862	29.6715	22.6348	27.5166	23.7874	19.0242	27.6732	12.6555	8.72392	9.89047	11.4779	9.0947	9.53321
chr1	39957318	39991607	BMP8A	ENSG00000183682.7	+	0.285706	0.314757	0.264061	0.406101	0.189357	0.159285	0.427668	0.250204	0.344173	0.134912	0.185371	0.219615	0.368967	0.202355	0.183481	0.101565	0.151779	0.227866
chr1	39980628	39982162	OXCT2P1	ENSG00000237624.1	+	1.62376	1.91495	1.7942	2.50233	1.38738	1.52906	1.28872	1.28856	0.962553	0.956919	0.900812	1.16495	0.954225	1.04096	1.28681	0.538343	0.991626	0.874965
chr1	39987952	40011859	RP11-69E11.4	ENSG00000182109.3	-	4.68797	4.03249	1.53877	4.00043	4.30211	4.88848	6.74901	2.92956	5.07165	4.69472	3.21454	4.07412	5.6669	6.41679	7.0985	5.49254	6.88017	7.08163
chr1	39997510	40024379	PPIEL	ENSG00000243970.1	-	1.85011	1.15272	1.30152	1.62428	1.58351	2.04408	1.91343	1.98409	2.58126	2.45706	1.75892	1.69289	2.49119	2.39259	1.92939	1.85942	2.59019	1.92088
chr1	40026488	40042462	PABPC4	ENSG00000090621.9	-	157.571	148.364	154.095	184.726	178.432	172.222	106.873	103.569	112.586	101.861	97.4431	108.728	118.069	100.735	111.285	97.7273	90.7031	87.4925
chr1	40030832	40038875	RP11-69E11.8	ENSG00000228060.1	+	0	0	0.102961	0	0	0.080151	0.026111	0.048457	0	0	0.11418	0	0	0	0	0	0	0.08298
chr1	40033046	40033180	SNORA55	ENSG00000201457.1	-	2.95482	0.915579	2.27705	2.46901	2.24935	5.27944	1.16574	1.12824	1.20906	0.602481	1.64994	2.37807	0.677388	0.927392	1.62392	1.32965	1.1333	0.471819
chr1	40089825	40105617	HEYL	ENSG00000163909.6	-	2.29403	2.80915	2.17939	3.11488	2.95665	3.08151	2.36367	1.7176	1.85029	1.71314	1.39817	1.44901	2.16693	1.64126	2.25108	2.37567	1.96591	1.99732
chr1	40099088	40099575	RP1-144F13.3	ENSG00000225903.1	+	0.13208	0	0	0	0	0	0	0	0	0	0	0	0	0	0	0	0	0
chr1	40124793	40137710	NT5C1A	ENSG00000116981.3	-	0	0	0	0	0	0	0	0	0	0	0	0	0	0	0	0	0	0
chr1	40144320	40157361	HPCAL4	ENSG00000116983.8	-	1.75381	1.94852	2.23328	1.53432	1.81642	2.05019	0.04508	0.021965	0.158755	0.088178	0.087646	0.04678	0.049502	0.036649	0	0	0	0.056004
chr1	40157854	40229586	PPIE	ENSG00000084072.12	+	50.7555	52.6969	46.8925	46.2465	43.8707	41.8887	35.4022	36.3582	33.3321	39.2978	33.8156	33.8521	45.6421	52.1825	50.3081	48.0976	51.0092	47.8321
chr1	40183700	40184267	RP1-144F13.4	ENSG00000225333.5	+	0.051748	0	0	0	0.088294	0	0	0	0	0	0	0	0	0	0	0	0	0
chr1	40189238	40189299	RNU7-121P	ENSG00000252413.1	-	0	0	0	0	0	0	0	0	0	0	0	0	0	0	0	0	0	0
chr1	40222854	40254533	BMP8B	ENSG00000116985.6	-	0.741621	0.632897	0.797221	0.874674	0.903506	0.853452	0.510832	0.446511	0.297202	0.241133	0.266441	0.374554	0.243029	0.228424	0.129944	0.201558	0.336532	0.305408
chr1	40235195	40237020	OXCT2	ENSG00000198754.5	-	1.89079	2.2369	2.28151	2.23996	1.63651	1.65539	1.18867	1.52597	1.08106	1.02413	1.03733	1.0242	0.851439	1.0356	1.58779	0.645203	0.955943	0.533755
chr1	40254648	40255843	RP1-118J21.25	ENSG00000261798.1	+	0.446095	0.213878	0.226387	0.334431	0.180171	0.277656	0.028681	0.064033	0	0.034543	0.128483	0	0	0.0635	0.122201	0.136442	0.033862	0.083541
chr1	40261515	40261668	RP1-118J21.24	ENSG00000229213.1	-	0	0	0	0	0	0	0	0	0	0	0	0	0	0	0	0	0	0
chr1	40306723	40349183	TRIT1	ENSG00000043514.11	-	57.4155	67.0871	66.8462	57.2337	61.283	66.3529	29.556	28.2475	26.2068	30.863	31.2394	31.2902	34.0438	33.1858	37.707	31.1684	26.881	30.5877
chr1	40347238	40347350	Y_RNA	ENSG00000202222.1	-	0	0.223181	0	0.118482	0	0	0	0.262406	0.195063	0	0	0.569614	0.467959	0	0.931239	0	0.01874	0
chr1	40361098	40367928	MYCL	ENSG00000116990.9	-	30.236	31.7705	27.4288	28.1804	30.7018	30.2715	26.8946	24.9659	21.534	25.1273	23.4033	21.2384	31.5744	28.7186	29.5449	35.2391	33.1004	33.5101
chr1	40363417	40364770	RP1-118J21.5	ENSG00000236546.1	+	0	0.113748	0.036684	0	0.053109	0	0.135099	0	0	0	0	0	0.036212	0	0	0.025108	0.009713	0.057374
chr1	40410562	40410670	Y_RNA	ENSG00000207356.1	-	0	0	0	0	0	0	0	0	0	0	0	0	0	0	0	0	0	0
chr1	40420802	40435638	MFSD2A	ENSG00000168389.13	+	12.4985	10.0425	9.05816	17.2032	15.1335	14.2745	6.78553	5.59975	7.19029	5.78822	5.75742	6.59356	4.08746	2.5379	2.62107	3.54429	2.31053	2.53128
chr1	40428352	40429076	RP3-342P20.2	ENSG00000228477.1	+	0.949388	0.767826	0.872348	1.66371	1.78953	2.62214	1.02527	1.58254	1.51757	0.900017	1.03857	1.14119	0.520555	0.830253	0.601146	0.707399	0.853126	0.279272
chr1	40505905	40538321	CAP1	ENSG00000131236.12	+	226.826	226.931	218.869	244.538	233.265	239.055	270.963	286.432	283.436	274.656	289.697	279.922	243.997	255.697	223.926	285.076	276.747	269.431
chr1	40538379	40563375	PPT1	ENSG00000131238.12	-	147.168	177.024	179.77	164.746	155.89	157.386	124.5	130.973	126.468	128.218	132.124	137.157	148.186	159.271	158.619	129.783	129.651	125.369
chr1	40598436	40599120	RP11-115D7.3	ENSG00000226745.2	+	0	0	0	0	0	0	0	0	0	0	0	0	0	0	0	0	0	0.036465
chr1	40627045	40706593	RLF	ENSG00000117000.8	+	36.4417	35.8448	38.6744	35.5522	35.2961	38.0365	14.8209	15.3402	16.3941	15.9537	16.5369	17.1134	18.8407	21.4285	19.4084	15.6665	18.4316	17.6819
chr1	40643515	40643621	RNU6-1237P	ENSG00000207508.1	+	0.524869	0.168354	0.112784	0.221576	0	0.222032	0.396453	0.263165	0.482407	0.898895	0	0.220262	0.335512	0	0	0	0	0
chr1	40711619	40717363	TMCO2	ENSG00000188800.5	+	0	0	0	0	0	0	0	0	0	0	0	0	0	0.10809	0	0	0	0
chr1	40722099	40723639	RP1-39G22.7	ENSG00000259943.1	-	8.76882	8.73297	9.35115	7.43252	8.02884	7.84499	7.66431	6.73124	7.35467	7.96555	7.33242	8.31928	11.5766	11.6356	12.4827	11.9473	10.4277	11.5182
chr1	40723779	40759856	ZMPSTE24	ENSG00000084073.4	+	39.0923	38.1696	40.5115	44.151	42.5533	41.061	54.0709	57.7993	57.1856	51.5479	59.7539	56.0089	59.4676	65.4333	58.3393	54.2396	56.5971	51.4185
chr1	40728344	40728656	RP1-39G22.4	ENSG00000231296.1	-	0	0	0	0	0	0	0	0	0	0	0	0	0	0	0	0	0	0
chr1	40766159	40783488	COL9A2	ENSG00000049089.9	-	3.3743	3.28223	3.01845	3.54296	3.7088	3.29975	32.8853	30.7995	26.0502	24.2853	19.3672	21.0468	326.919	299.481	342.857	263.892	222.728	277.479
chr1	40798748	40799230	RP1-228H13.1	ENSG00000227311.2	-	0.061523	0.201954	0.49148	0.492446	0.301337	0.600438	0.258066	0.297102	0.443968	0.73425	0.646164	0.336729	0.039838	0.941379	0.270991	0.788476	0.293788	0.145131
chr1	40810522	40888998	SMAP2	ENSG00000084070.7	+	5.51867	5.53299	5.52069	7.02927	7.66917	7.34222	9.61412	9.76521	9.24914	8.55121	8.27851	8.84791	12.6126	9.35897	10.3998	7.58244	7.10158	7.09159
chr1	40830438	40830855	RP1-228H13.2	ENSG00000213172.3	+	0	0	0	0	0	0	0	0	0	0	0	0	0	0	0	0	0	0
chr1	40915774	40929390	ZFP69B	ENSG00000187801.10	+	3.74824	4.39578	4.74281	4.3317	4.85021	5.19184	6.3461	5.93149	5.48337	5.86257	6.20231	6.84562	7.72316	7.28646	8.47977	7.63936	7.77513	8.50536
chr1	40929991	40932436	RP1-228H13.5	ENSG00000260920.1	+	3.80198	3.57095	3.38614	4.49422	3.63111	3.47826	4.82783	4.5793	4.38198	4.66085	4.9992	5.434	5.74235	5.85942	5.18287	6.03114	5.19072	6.28947
chr1	40942887	40962015	ZFP69	ENSG00000187815.5	+	3.29592	3.83812	4.04488	4.78659	4.48007	3.50335	5.13416	5.91576	5.69573	5.50067	4.5506	6.16171	6.08292	8.39336	6.42345	5.69595	5.70592	5.64445
chr1	40958829	40974333	RP11-656D10.3	ENSG00000238287.1	-	0.866251	0.748958	0.966516	0.705842	0.863103	1.12701	1.52114	1.44601	1.26917	1.61326	1.49751	1.72844	0.864417	1.32954	0.988645	1.28164	0.967789	1.57562
chr1	40974413	40982228	EXO5	ENSG00000164002.7	+	2.57586	2.70655	3.02674	3.73248	2.68096	2.97968	7.15892	7.08835	6.9137	6.86289	7.28124	7.14533	5.61765	6.16683	6.19495	5.14318	4.11527	3.57394
chr1	40980133	40980729	RP11-656D10.5	ENSG00000227278.1	-	0	0	0	0	0	0	0	0	0	0	0	0	0	0	0	0	0	0
chr1	40981426	40982846	RP11-656D10.6	ENSG00000238186.1	-	0	0	0	0	0	0	0	0	0	0	0	0	0	0	0	0	0	0
chr1	40997233	41013841	ZNF684	ENSG00000117010.11	+	5.1411	4.39393	5.49775	5.39004	7.17106	6.78313	4.63715	4.01032	4.23839	5.10022	5.66156	5.07492	5.89208	6.72283	6.5404	5.80357	6.05073	6.22898
chr1	41029206	41029331	RP1-63P18.2	ENSG00000236505.1	+	0	0	0	0	0	0	0	0	0	0	0	0	0	0	0	0	1.26047	0
chr1	41059305	41060025	GTF2F2P2	ENSG00000233910.1	-	0	0	0	0	0	0	0	0	0	0	0	0	0	0	0	0	0	0
chr1	41086351	41131329	RIMS3	ENSG00000117016.5	-	15.6357	13.274	12.4052	14.375	14.6962	15.0047	11.035	9.51823	10.5661	10.5782	9.67441	10.1604	9.37921	9.49536	10.4334	11.1395	10.7959	12.0417
chr1	41134761	41153260	RP4-739H11.3	ENSG00000237899.1	-	0.159355	0	0.169104	0.560812	0	0.058847	0.211819	0.182072	0.467393	0.313849	0	0.162729	0.369772	0	0.258327	0.66737	0.419246	0.151145
chr1	41156052	41157738	RP4-739H11.4	ENSG00000272145.1	-	2.86727	3.07997	3.05253	2.48058	2.413	2.21887	2.04406	2.34525	2.1003	2.38609	1.40448	3.00346	3.27772	2.62939	3.41795	2.77744	2.24881	3.49171
chr1	41157320	41237275	NFYC	ENSG00000066136.15	+	51.0338	52.8858	54.5221	47.24	48.3526	47.7483	46.805	49.7446	48.816	46.251	44.6039	44.9009	56.1081	48.4642	43.9374	46.6002	42.6847	49.1049
chr1	41220027	41220118	MIR30E	ENSG00000198974.1	+	0	0	0	0	0	0	0	0	0	0	0	0.139927	0	0	0	0	0	0
chr1	41222956	41223044	MIR30C1	ENSG00000207962.1	+	0.141538	0.277137	0	0	0	0	0	0	0	0	0	0	0	0.016276	0.172427	0	0	0
chr1	41249684	41306124	KCNQ4	ENSG00000117013.10	+	3.01379	3.05933	3.0985	3.03709	3.17334	2.9474	1.82219	1.19226	1.78714	1.37779	1.10521	1.73745	0.860787	0.122225	0.332935	1.09271	1.09689	0.807537
chr1	41270518	41270811	RN7SL326P	ENSG00000264582.1	+	0	0	0	0	0	0	0	0	0	0	0	0.07949	0	0.100654	0	0	0	0
chr1	41326729	41328018	CITED4	ENSG00000179862.5	-	6.6398	4.90877	5.74444	6.25549	5.26396	6.74848	4.52785	3.63625	3.58414	3.46443	3.18938	3.07961	5.65912	3.57587	4.92784	5.79141	7.15485	7.65698
chr1	41329586	41342342	RP5-1066H13.4	ENSG00000229528.1	+	0	0	0	0	0	0	0	0	0	0	0	0	0	0	0	0	0	0
chr1	41403776	41405435	RP11-348A7.1	ENSG00000228940.1	-	0	0	0	0	0	0	0	0	0	0	0	0	0	0	0	0	0	0
chr1	41407923	41408187	UBE2V1P8	ENSG00000233118.2	-	0	0	0	0	0	0	0	0	0	0	0	0	0	0	0	0	0	0
chr1	41445007	41478235	CTPS1	ENSG00000171793.9	+	75.661	73.1167	74.4189	87.847	83.8166	82.3326	72.0565	66.129	78.7013	66.9147	66.5694	73.1836	83.2683	74.8009	80.3086	81.4034	73.4664	75.8745
chr1	41481269	41488909	SLFNL1	ENSG00000171790.11	-	0.027218	0	0	0	0	0.022233	0.030621	0	0	0.01952	0	0.029822	0.03979	0.030201	0	0	0	0
chr1	41492872	41707826	SCMH1	ENSG00000010803.12	-	11.484	11.9304	8.89781	11.8733	11.1672	11.9866	9.45892	8.42307	9.19924	8.86805	9.27076	10.854	12.8522	12.5782	12.676	16.2345	14.433	15.4038
chr1	41564310	41564808	RP4-635E8.1	ENSG00000215893.3	+	0	0	0	0	0	0	0	0	0	0	0	0	0	0	0	0	0	0
chr1	41708045	41750533	RP11-399E6.1	ENSG00000235358.1	+	0	0	0.149329	0	0	0	0	0	0	0	0	0.136015	0	0	0	0.057251	0.244099	0
chr1	41730222	41730534	RP11-399E6.2	ENSG00000213987.4	-	0	0	0	0	0	0	0	0	0	0	0	0	0	0	0	0	0	0
chr1	41827594	41849262	FOXO6	ENSG00000204060.4	+	5.82904	4.97345	5.02304	4.57121	4.86795	4.43458	1.7156	1.1924	1.01553	1.09596	0.810004	1.15444	1.48129	0.92665	0.912083	0.483381	0.472991	0.725116
chr1	41840676	41841341	RP11-399E6.4	ENSG00000229901.1	-	0	0	0	0.518914	0	0	0	0	0.258477	0	0	0	0	0	0	0	0	0
chr1	41932608	41932699	RNA5SP45	ENSG00000252563.1	-	0	0	0	0	0	0	0	0	0	0	0	0	0	0	0	0	0	0
chr1	41944446	41950344	EDN2	ENSG00000127129.5	-	0	0.070345	0.210398	0.262967	0.043076	0.555384	0	0	0	0	0	0	0	0	0	0	0	0
chr1	41972036	42501596	HIVEP3	ENSG00000127124.9	-	0.163709	0.19139	0.060644	0.274768	0.17631	0.074821	0.387328	0.359139	0.349278	0.457659	0.2911	0.476903	0.136492	0.047165	0.064451	0.176628	0.170822	0.349954
chr1	42001114	42001539	RP11-486B10.3	ENSG00000230881.1	+	0	0	0	0	0	0	0	0	0	0	0	0	0	0	0	0	0	0
chr1	42007740	42010258	RP11-486B10.4	ENSG00000230638.3	+	0	0	0	0	0	0	0	0	0	0	0	0	0	0	0	0	0	0
chr1	42224812	42224898	AL451006.1	ENSG00000264896.1	+	0	0	0	0	0	0	0	0	0	0	0	0	0	0	0	0	0	0
chr1	42506268	42507400	HNRNPFP1	ENSG00000227538.1	+	0	0	0	0	0	0	0	0	0	0	0	0	0	0	0	0	0	0
chr1	42606306	42607062	RP11-319C21.1	ENSG00000228776.2	+	0	0	0	0	0	0	0	0	0	0	0	0	0	0	0	0	0	0
chr1	42619092	42621495	GUCA2B	ENSG00000044012.3	+	0	0	0	0	0	0	0	0	0	0	0	0	0	0	0	0	0	0
chr1	42628362	42630389	GUCA2A	ENSG00000197273.3	-	0	0	0	0	0	0	0	0	0	0	0	0	0	0.580083	0	0	0	0.217301
chr1	42642210	42801548	FOXJ3	ENSG00000198815.4	-	41.4765	31.5291	28.1572	38.8464	34.8082	41.1073	30.7485	31.6891	28.9432	29.6188	29.173	39.2772	58.1995	38.5411	38.5473	40.1427	39.3263	56.0389
chr1	42801057	42804047	RP11-223A3.1	ENSG00000227527.2	-	0	0	0	0	0	0	0	0	0	0	0	0	0	0	0.033166	0	0	0
chr1	42846466	42888249	RIMKLA	ENSG00000177181.10	+	17.1658	17.6043	15.1888	16.3693	15.3849	16.2092	0.937051	0.811148	0.837073	0.869189	0.859587	0.89205	0.614624	0.553106	0.541203	0.808253	0.576934	0.695261
chr1	42878069	42878465	RP11-157D18.2	ENSG00000235002.1	-	0.027764	0.013612	0.061901	0	0	0	0.005607	0	0	0	0	0	0	0.104251	0.079151	0.034366	0.113347	0
chr1	42896000	42921938	ZMYND12	ENSG00000066185.8	-	1.97208	0.71475	0.540585	0.454432	0.826933	0.555068	1.13785	1.62683	0.927114	1.47148	0.942353	1.14018	1.72722	2.90153	2.40064	0.71104	1.36679	1.30394
chr1	42921788	42939056	PPCS	ENSG00000127125.7	+	38.8593	43.0517	42.6153	43.0023	34.8869	38.5961	46.276	43.5217	38.7461	45.722	50.0095	46.973	69.6407	70.3644	63.9089	56.0102	60.1106	56.8812
chr1	42929001	43120335	CCDC30	ENSG00000186409.10	+	1.03485	0.875767	1.13074	0.942175	0.889544	0.512756	1.91237	1.47289	1.79152	1.3833	1.74479	1.99999	3.51076	4.38922	2.92774	2.39571	2.48614	2.09706
chr1	42957410	42958164	RP11-163G10.2	ENSG00000230116.1	+	0	0	0	0	0	0	0	0	0.064303	0	0	0.012591	0	0.040565	0.086143	0	0.143042	0
chr1	42965876	42966067	TMSB4XP1	ENSG00000236876.2	-	1.71288	1.92384	1.83262	2.12153	2.30931	6.42048	5.01037	5.50933	7.0032	5.72658	7.05053	9.73566	3.56185	8.1166	6.99523	4.68385	3.1403	3.37256
chr1	43034704	43034810	RNU6-536P	ENSG00000200254.1	+	0	0	0	0	0	0	0	0	0	0.195063	0	0	0	0.12571	0	0.037502	0	0
chr1	43036641	43037061	RP11-163G10.4	ENSG00000236180.2	+	0	0	0.033876	0	0	0	0	0.113502	0	0	0	0	0	0.080121	0.184861	0	0.1094	0.118664
chr1	43124096	43142429	PPIH	ENSG00000171960.6	+	88.5254	100.138	93.9544	87.8485	90.0065	91.9698	78.0157	82.3747	84.212	78.5978	80.9001	82.0336	83.4085	81.7736	82.9965	80.1783	81.5104	77.1298
chr1	43144406	43147325	RP5-994D16.3	ENSG00000234917.1	+	0.420952	0	0.187019	0.225106	0	0.137301	0.240326	0.233009	0.328637	0.171488	0.339975	0.356557	0.196989	0.176731	0	0.072265	0.162994	0.496116
chr1	43148098	43168020	YBX1	ENSG00000065978.13	+	1821.83	1826.7	1804.01	1808.38	1843.73	1837.75	1221.87	1236.86	1271.77	1224.51	1298.14	1278.49	1079.05	1099.3	1065.49	1059.13	1136.73	1038.41
chr1	43198764	43205925	CLDN19	ENSG00000164007.6	-	10.8019	8.56879	7.0522	8.8963	8.83567	9.004	10.9373	9.25776	7.77735	8.94692	7.69538	7.1281	24.6732	20.6086	21.0458	13.9563	12.4983	15.2089
chr1	43212006	43232755	LEPRE1	ENSG00000117385.11	-	44.8952	43.9318	39.7757	46.5864	45.521	44.5259	31.9615	27.0938	31.7549	28.8955	26.9945	29.7187	33.8158	32.5931	33.8872	36.3368	33.2916	38.7862
chr1	43232940	43263968	C1orf50	ENSG00000164008.9	+	13.9395	12.2173	11.9045	13.0019	13.5452	11.3287	14.5342	12.8575	15.6612	15.0742	14.502	13.2431	13.5541	13.5788	12.7626	16.7168	17.2527	18.3783
chr1	43241484	43242461	RP5-994D16.9	ENSG00000228452.1	-	0	0	0	0	0	0	0	0	0	0	0	0	0	0	0	0	0	0
chr1	43272723	43282954	CCDC23	ENSG00000177868.7	-	43.7009	43.7558	47.3646	40.705	41.7036	40.5557	59.2669	66.6114	62.5272	66.7924	65.6971	60.5672	64.8219	73.3843	68.7973	61.6067	70.3958	63.3635
chr1	43282795	43310660	ERMAP	ENSG00000164010.9	+	4.56766	4.31501	4.84365	4.1533	3.61353	4.66655	5.36281	4.69333	5.39984	4.98667	4.73916	5.11311	6.09799	6.31022	5.25067	5.36217	4.4648	4.79692
chr1	43300352	43312093	RP11-342M1.3	ENSG00000228192.3	-	1.14863	0.540575	0.318513	1.28311	0.910825	0.734602	1.39329	1.88634	2.2212	1.86855	1.3597	1.39268	1.48826	0.636827	0.907863	0.817647	1.21934	0.889792
chr1	43312280	43318148	ZNF691	ENSG00000164011.13	+	20.1532	23.6421	20.7707	18.0913	19.8589	20.1567	18.7738	16.9892	18.0053	17.9142	16.1069	18.0856	18.7895	18.4118	17.3354	15.5813	14.5793	14.1582
chr1	43352268	43354438	RP11-342M1.7	ENSG00000233708.1	-	0	0	0	0	0	0	0	0	0	0	0	0	0	0	0	0	0	0
chr1	43356765	43358101	RP11-342M1.6	ENSG00000237090.1	-	0	0.039501	0	0	0	0	0	0	0	0.120568	0	0	0	0	0	0	0	0
chr1	43368903	43369583	ATP6V1E1P1	ENSG00000225099.1	+	0	0.075694	0	0.037272	0.017399	0.109312	0.05191	0	0.040561	0.130809	0.095562	0.232368	0.027783	0	0	0.078173	0.382342	0.090782
chr1	43391052	43424530	SLC2A1	ENSG00000117394.15	-	530.94	523.058	445.327	503.722	504.416	510.874	33.6477	29.7624	35.4251	28.622	28.7257	29.8597	38.4708	31.1677	31.7163	30.4082	27.1556	27.9929
chr1	43424720	43449029	SLC2A1-AS1	ENSG00000227533.1	+	9.84262	9.79089	8.05746	9.33385	8.62174	9.92228	1.62867	0.608174	1.26074	1.03618	1.33804	0.768203	1.60757	0.724361	0.770757	0.84152	1.34255	1.11608
chr1	43457109	43457215	RNU6-880P	ENSG00000207256.1	+	1.09143	2.27667	1.72456	0.547423	1.44473	2.30914	0	0.149526	0.232077	0.116635	0.407733	0	0.349114	0	0	0.17001	0	0
chr1	43489220	43489308	RNU6-870P	ENSG00000252803.1	-	0	0	0	0	0	0	0	0	0	0	0	0	0	0	0	0	0	0
chr1	43610824	43622067	FAM183A	ENSG00000186973.6	+	1.76803	0.942398	0.938388	1.18965	1.21351	0.927382	1.31818	0.863274	0.642163	0.453601	0.580462	1.04123	0.992035	1.45179	0.903552	0.877489	0	1.22086
chr1	43629846	43736607	EBNA1BP2	ENSG00000117395.6	-	84.9761	75.4855	81.7355	97.3959	92.5943	89.5079	69.8696	69.1541	78.7005	70.0991	67.6714	72.2196	62.9267	68.4638	66.5975	57.0639	57.9062	53.2641
chr1	43637820	43720029	WDR65	ENSG00000243710.3	+	0.189605	0.139618	0.115205	0.210943	0.255195	0.185599	0.51406	0.339997	0.315903	0.124456	0.206096	0.25875	0.906885	0.881246	0.520793	0.148952	0.265557	0.198853
chr1	43662088	43662207	RNA5SP46	ENSG00000199240.1	+	0	0	0	0	0	0	0	0	0.09998	0	0	0	0	0	0	0	0	0
chr1	43735665	43739673	TMEM125	ENSG00000179178.6	+	28.2298	25.7826	20.8911	22.068	26.3947	24.8515	16.2742	14.7144	14.0829	20.6145	15.3807	15.8949	14.1336	18.1552	20.2831	28.5041	33.1365	31.2548
chr1	43747554	43751288	C1orf210	ENSG00000253313.1	-	10.9516	10.1226	10.4985	10.6715	11.2884	10.261	12.0316	13.1638	11.7515	14.5476	13.1968	12.2447	12.475	13.3056	14.0276	24.6088	22.3127	26.5877
chr1	43766664	43788779	TIE1	ENSG00000066056.9	+	2.14367	1.70568	1.54309	1.89256	2.43661	2.19628	1.05975	0.935815	0.705927	0.835209	0.705251	0.787926	0.53652	0.507547	0.339118	2.31099	2.33242	2.67649
chr1	43803478	43818443	MPL	ENSG00000117400.10	+	0.053294	0.108013	0.075726	0.184091	0.019783	0.103558	0.18303	0.213542	0.271288	0.119724	0.095334	0.182994	0.327526	0.253208	0.159269	0.184929	0.516229	0.266919
chr1	43820355	43824329	RP1-92O14.3	ENSG00000234694.1	-	1.69252	1.08381	1.52562	0.53844	0.933803	0.893352	0.468249	0.958179	0.522149	0.91798	0.541217	0.686735	0.493572	0	0.286888	0	0.962684	0.369389
chr1	43824626	43828874	CDC20	ENSG00000117399.9	+	193.098	185.438	174.546	196.668	191.745	185.018	152.192	144.27	159.066	159.108	151.495	150.979	203.681	199.805	200.278	214.825	216.669	230.971
chr1	43829068	43833696	ELOVL1	ENSG00000066322.8	-	32.9293	36.6739	34.5331	34.0382	35.5238	33.4394	35.2421	35.4726	36.0888	33.7503	36.1544	32.4156	33.0164	35.3321	32.2258	39.1134	35.0004	36.3011
chr1	43849588	43855479	MED8	ENSG00000159479.12	-	14.5412	13.9515	14.4623	13.9294	14.1493	14.6015	15.8869	15.3355	15.5572	14.5933	16.2161	15.2527	14.815	16.0781	15.873	17.3658	18.8196	18.3456
chr1	43850784	43854826	RP1-92O14.6	ENSG00000229431.1	+	0	0	0	0	0	0	0	0	0	0	0	0	0	0	0	0	0	0
chr1	43855553	43918321	SZT2	ENSG00000198198.9	+	3.54627	3.03924	2.78536	4.24829	3.9214	3.76113	8.16523	6.80384	7.85717	6.41271	6.29813	6.59918	8.81999	6.69906	8.25674	8.7282	7.07613	9.36336
chr1	43913447	43914315	SZT2-AS1	ENSG00000229372.1	-	0.137115	0.190388	0.023547	0.103283	0	0.093494	0.012834	0.015073	0	0	0.131899	0.085643	0.125036	0	0.084207	0.121386	0	0
chr1	43916824	43919660	HYI	ENSG00000178922.12	-	7.16455	5.8076	7.23316	4.79604	5.17687	5.46015	8.30538	8.34256	6.44703	6.84921	6.78904	7.72547	10.6749	8.08254	12.0408	8.12113	9.20589	8.66792
chr1	43919598	43922666	HYI-AS1	ENSG00000229348.1	+	0	0	0	0	0	0.259099	0.292131	0.443416	0.381888	0.209926	0.439692	0.282319	0.196703	0.273086	0.3777	0	0.361034	0.189185
chr1	43990858	44089343	PTPRF	ENSG00000142949.12	+	157.959	142.721	127.644	147.121	138.118	134.135	125.804	108.178	113.361	114.048	104.079	92.6704	129.12	110.845	128.98	134.526	121.506	142.39
chr1	44115829	44171186	KDM4A	ENSG00000066135.8	+	73.6855	67.8572	68.5564	81.9734	76.9501	77.7392	45.6506	45.2157	46.4548	47.7673	44.4387	47.8992	46.6509	46.2574	46.5445	61.8199	61.2268	60.4933
chr1	44165436	44173809	KDM4A-AS1	ENSG00000236200.1	-	1.24198	0.731322	1.0613	0.741137	1.07738	1.58468	0.719922	1.05103	0.557647	0.966848	0.602594	1.07585	2.01081	2.47013	2.31445	1.17004	0.815994	0.592209
chr1	44171495	44396831	ST3GAL3	ENSG00000126091.15	+	6.51481	7.04425	6.53755	8.15075	6.86008	5.94584	10.7065	7.68406	7.13561	7.70861	7.674	8.19045	11.5016	8.63798	10.8516	10.6702	9.93559	7.90985
chr1	44175063	44193014	RP11-184I16.4	ENSG00000229444.1	-	0	0	0	0	0	0	0	0	0	0	0	0	0	0	0	0	0	0
chr1	44182138	44182227	RNU6-1058P	ENSG00000252201.1	+	0	0	0	0	0.367407	0	0	0	0	0.076506	0	0	0.199443	0	0.730764	0	0	0
chr1	44209142	44209412	RP11-184I16.3	ENSG00000233674.2	+	0	0	0.206461	0.055579	0	0.465623	0	0.592739	0	0.107189	0.280832	0.374177	0.05818	0.14968	0.014831	0.391896	0	0
chr1	44315972	44317283	SHMT1P1	ENSG00000224751.2	-	0	0	0	0	0	0.007678	0.039518	0	0	0.016072	0.018289	0	0	0	0.027571	0	0	0
chr1	44398992	44402913	ARTN	ENSG00000117407.12	+	12.4804	10.7559	12.6993	9.80818	13.1244	13.7825	2.01666	2.11514	2.91304	1.47609	1.24915	1.75565	1.68566	0.7333	1.31984	1.91623	1.17739	0.754931
chr1	44410042	44412223	RP11-7O11.3	ENSG00000237950.1	-	1.23711	1.72498	0.614905	0.962184	1.25871	0.683833	0.052802	0	0	0	0	0	0	0	0	0	0.214331	0.51765
chr1	44412611	44433694	IPO13	ENSG00000117408.6	+	12.2873	11.6128	10.3527	12.1847	11.8409	12.4533	13.2564	11.5607	12.1223	11.681	11.291	10.3701	13.8744	13.0027	12.37	13.5162	12.6881	12.848
chr1	44435672	44439041	DPH2	ENSG00000132768.9	+	29.5813	27.1308	25.563	33.3017	29.9173	31.1174	18.5019	18.0258	19.5226	17.0046	17.9373	16.0042	26.8221	25.1146	24.9746	23.8546	20.8188	18.3502
chr1	44440159	44443967	ATP6V0B	ENSG00000117410.9	+	45.98	43.8368	46.3026	55.7522	49.019	43.6975	58.8771	50.9157	50.1901	50.0054	45.6198	46.5439	60.2473	57.613	59.342	66.2478	65.1219	66.14
chr1	44444615	44456840	B4GALT2	ENSG00000117411.12	+	45.0391	44.2212	39.1343	48.3676	45.6292	44.3271	48.9524	48.5813	46.879	45.1274	42.2175	37.5577	67.7636	60.4673	62.4628	52.0098	49.3094	49.9764
chr1	44457031	44462200	CCDC24	ENSG00000159214.8	+	11.8632	11.3415	12.4474	10.4988	14.896	11.1532	16.89	14.8161	14.7358	13.4142	11.2365	12.4248	20.9834	22.7487	26.2502	21.6319	15.8326	21.7545
chr1	44457172	44497139	SLC6A9	ENSG00000196517.7	-	6.81145	5.73419	6.14709	8.43351	8.1015	8.01081	8.15125	7.33313	6.73004	6.17997	5.65248	7.15494	6.34937	3.39858	5.25462	6.45816	4.31416	3.92213
chr1	44501798	44570647	RP5-1198O20.4	ENSG00000230615.2	+	0	0.841789	0.746689	1.08007	0.816955	0.778575	1.15989	1.45614	0.912019	1.48535	1.76335	1.8841	2.274	1.49096	2.0595	1.15491	1.63017	1.46282
chr1	44553630	44554149	RP5-1198O20.5	ENSG00000227163.2	-	0	0	0	0	0	0	0	0	0	0	0	0	0	0	0	0	0	0
chr1	44568978	44570375	KRT8P47	ENSG00000271647.1	-	0.030411	0	0.242644	0.211888	0.154532	0.083858	0.174663	0.121259	0.08582	0.142032	0.126562	0.02347	0.017747	0.121084	0.051227	0.057024	0.105273	0.053602
chr1	44582772	44583069	RN7SL479P	ENSG00000239560.2	-	0	0	0	0	0	0	0	0	0	0	0	0	0	0	0	0	0	0
chr1	44584522	44600812	KLF17	ENSG00000171872.4	+	0	0	0	0	0	0	0	0	0	0	0	0	0	0	0	0	0	0
chr1	44587825	44588184	RP11-570P14.1	ENSG00000233514.1	-	1.34716	2.6559	2.81278	2.14734	1.17341	3.16913	2.16721	1.25624	1.64386	0.704688	0.988349	1.32859	2.01498	1.3931	1.52648	1.43493	1.88426	0.983535
chr1	44603514	44604485	RP4-675G8.2	ENSG00000239275.1	-	0	0	0	0	0	0	0	0	0.405442	0	0	0	0	0	0.27632	0	0	0
chr1	44616266	44617425	RP4-675G8.3	ENSG00000226804.4	-	0.249539	0.103449	0.331015	0	0	0	0.11648	0.210197	0.28647	0	0	0	0.234829	0.129158	0.125364	0	0	0
chr1	44619057	44619152	Y_RNA	ENSG00000200171.1	-	0	0	0	0	0	0	0	0	0	0	0	0	0	0	0	0	0	0
chr1	44620700	44620973	RP4-675G8.4	ENSG00000238037.1	-	0	0	0	0	0	0	0	0	0.097757	0	0	0	0	0	0	0	0	0
chr1	44638178	44638391	RP5-891H21.1	ENSG00000227994.1	-	0	0	0	0	0	0	0	0	0	0	0	0	0	0	0	0	0	0
chr1	44653615	44654721	RP5-891H21.5	ENSG00000271329.1	-	0	0	0	0	0	0	0	0.117113	0	0	0	0.163715	0	0	0	0	0	0
chr1	44679127	44686353	DMAP1	ENSG00000178028.9	+	20.9899	19.214	18.2393	19.8756	21.326	22.0224	32.1378	31.1002	28.3023	26.3958	27.3176	27.7523	34.9064	36.1274	37.2555	41.1339	36.743	37.9109
chr1	44686742	44820932	ERI3	ENSG00000117419.10	-	56.9093	53.1925	59.1787	64.355	53.3186	54.4198	55.331	50.0734	51.2102	52.1319	47.733	48.2878	67.857	68.2278	67.187	63.4335	60.5309	57.6117
chr1	44709080	44709945	ERI3-IT1	ENSG00000233602.1	-	0.693183	0.329072	0.010634	0.984124	0.424685	1.08403	0.626082	0.45077	0.297945	0.422001	0.114335	0.589992	0.564681	0.758218	0.44684	0.899355	0.585415	0.914506
chr1	44798777	44798850	AL390776.1	ENSG00000252146.1	-	0	0	0	0	0	0	0	0	0.150818	0	0	0.133818	0.213065	0	0	0	0	0
chr1	44856394	44856495	RNU6-369P	ENSG00000199385.1	+	0	0	0	0	0	0	0	0	0	0	0	0	0	0	0	0	0	0
chr1	44870866	45117396	RNF220	ENSG00000187147.13	+	61.469	60.2844	58.248	60.8531	60.2587	62.3384	49.3922	52.277	50.5416	51.2362	50.069	50.6705	66.3901	58.1797	70.1276	71.5198	74.2477	62.7677
chr1	45011165	45011224	MIR5584	ENSG00000263381.1	+	0	0	0	0	0	0	0	0	0	0	0	0	0	0	0	0	0	0
chr1	45100910	45140227	TMEM53	ENSG00000126106.9	-	3.88965	4.03569	3.09502	5.34963	2.42505	4.09178	8.98805	10.6978	8.01519	6.6432	7.46929	6.15038	10.336	10.3667	11.1322	8.81366	9.99099	7.41588
chr1	45140364	45191263	C1orf228	ENSG00000198520.6	+	0.189415	0.11109	0.150881	0.159197	0.31289	0	0.483952	0.677745	0.656375	0.540017	0.73069	0.316811	1.00281	0.999489	1.33945	1.45396	1.54754	0.783206
chr1	45187458	45187574	RNU5F-1	ENSG00000199377.1	-	0.237761	2.07735	0.388197	0.214558	0.53698	0.460259	0	0	0.169316	0.662067	0.188513	0.133726	0.207321	0	0	0.411563	0.230762	0
chr1	45196727	45196842	RNU5D-1	ENSG00000200169.1	-	0.08597	0	0.126731	0	0.24705	0	1.24607	0.625258	0.259772	0.489701	0.208943	0.751226	0.424491	0	0	0.79563	0.438121	1.98107
chr1	45205490	45233439	KIF2C	ENSG00000142945.8	+	79.4221	88.2048	83.3813	69.2717	74.6369	86.6094	43.9112	49.7106	47.0948	53.4421	54.4569	54.4832	65.146	68.3598	70.4512	66.5197	82.8069	85.8719
chr1	45224709	45241482	RP11-269F19.2	ENSG00000225721.1	-	0	0	0	0	0	0	0	0	0.215996	0.167715	0	0	0.182666	0	0	0	0	0
chr1	45240923	45244451	RPS8	ENSG00000142937.7	+	2566.23	2704.55	2715.57	2421.85	2547.28	2429.35	1942.25	2087.82	2022.62	2090.14	2148.76	2045.76	1866.84	1994.53	1990.57	1712.67	1862.31	1792.42
chr1	45241536	45241615	SNORD55	ENSG00000264294.1	+	5.4e-05	9.1e-05	3.6e-05	3.1e-05	2.7e-05	4.1e-05	2.9e-05	2.3e-05	4.7e-05	3.5e-05	3.5e-05	1.3e-05	4.6e-05	2.8e-05	1.8e-05	4.1e-05	5.2e-05	7.9e-05
chr1	45242162	45242265	SNORD46	ENSG00000200913.1	+	4.39578	4.20502	3.50221	4.74441	6.03572	2.01279	1.42509	1.37634	1.96115	2.03172	1.8015	1.01882	4.10263	2.83347	4.53565	1.72599	6.86942	4.18513
chr1	45243515	45243584	SNORD38A	ENSG00000202031.1	+	7.30942	9.69124	6.43018	6.12407	8.75422	7.73808	4.59768	4.16212	4.85807	6.47707	5.10144	4.24556	7.77599	4.44516	7.7665	7.99512	5.81538	4.88659
chr1	45244062	45244128	SNORD38B	ENSG00000207421.1	+	0.000989	0.006566	0.000666	0.000256	0.000687	0.005978	0.000671	0.000428	0.011908	0.000491	0.000258	0.000393	0.000531	0.000345	0.000877	0.000726	0.000709	0.001207
chr1	45245998	45246387	RPS15AP11	ENSG00000234093.2	-	0.923334	0.584508	1.10632	1.59335	1.1986	1.29201	1.1389	0.404483	0.735586	1.17255	0.403538	0.792716	1.03705	0.857854	0.627474	0.688246	0.912883	0.837758
chr1	45249257	45253377	BEST4	ENSG00000142959.4	-	1.78066	1.70654	1.84697	1.32839	1.55856	1.43682	1.75508	1.64031	1.67995	1.82397	1.75772	1.74491	2.79265	2.49691	3.59956	2.01381	1.87968	1.57445
chr1	45265897	45271662	PLK3	ENSG00000173846.8	+	5.04966	5.67996	4.87249	5.0592	5.74292	4.61372	3.84479	3.48849	3.04244	2.32066	2.64047	2.98291	2.6351	1.89789	2.51238	4.12511	2.74671	3.126
chr1	45271585	45272957	TCTEX1D4	ENSG00000188396.2	-	0	0	0	0	0	0	0	0.169022	0	0	0	0	0	0.076066	0.046706	0	0	0
chr1	45274154	45281257	BTBD19	ENSG00000222009.4	+	0.137806	0.04251	0.084845	0.305004	0.17972	0.23801	0.944685	0.756775	0.633744	0.987437	0.720712	0.458332	1.62771	0.597431	1.20559	0.819722	0.886625	0.798269
chr1	45285516	45308735	PTCH2	ENSG00000117425.9	-	0.187835	0.084663	0.14484	0.239013	0.205183	0.155759	0.555504	0.254271	0.392271	0.335261	0.334333	0.209559	0.160237	0.086215	0.181783	0.146086	0.023599	0.16835
chr1	45285555	45285669	RNU5E-6P	ENSG00000202444.1	-	0.120611	0.299655	1.42906	0.213666	0.383381	0.387924	0.658052	0.326477	0.407603	0.359243	0.434166	0.644409	0.14554	0	0.438458	0.81431	0	0.697801
chr1	45309593	45309754	RP5-882O7.1	ENSG00000226499.1	-	0.646058	0.784342	0.754975	0.147239	0.064561	0.765825	1.21642	0.413478	0.0572	0.405107	0.524852	1.50883	0.411265	0.611361	0	0.461282	0.594202	0.669272
chr1	45316450	45452282	EIF2B3	ENSG00000070785.12	-	33.8745	32.3928	33.9263	32.8314	32.5743	31.5444	28.31	27.3494	29.3614	31.2739	31.1881	29.9337	27.5703	30.0612	25.99	32.3804	28.8757	29.1683
chr1	45378740	45378844	AL136380.1	ENSG00000266294.1	-	0	0	0	0	0	0	0	0	0	0	0.242374	0.532221	0	0	0	0	0	0
chr1	45397995	45398103	RNA5SP47	ENSG00000253039.1	+	0	0	0	0	0	0	0	0	0	0	0	0	0	0	0	0	0	0
chr1	45424229	45425067	CCNB1IP1P1	ENSG00000229815.1	+	0	0	0	0	0.015335	0	0	0	0	0	0.004971	0	0.000478	0.094491	0.018073	0	0	0
chr1	45453906	45454397	RP5-882O7.4	ENSG00000232369.1	-	0.052274	0	0	0.009987	0	0.058725	0.0479	0	0	0	0.004335	0.036727	0	0.020981	0	0.190791	0	0
chr1	45454377	45457506	MRPS17P1	ENSG00000268949.1	-	0	0	0	0	0	0	0	0	0	0.01643	0	0	0	0	0	0	0	0
chr1	45468212	45477001	HECTD3	ENSG00000126107.10	-	19.7084	21.4745	18.9261	21.9749	20.3819	22.2692	40.8465	35.6077	35.6651	36.3058	33.598	32.4245	31.2751	28.8728	30.3373	34.2533	32.8891	33.2786
chr1	45477819	45481247	UROD	ENSG00000126088.8	+	62.3082	67.5913	66.6955	66.8781	70.4891	69.1601	152.838	147.807	138.755	129.697	135.026	120.951	87.8102	87.4479	80.6985	97.5683	94.1674	83.7218
chr1	45482071	45771881	ZSWIM5	ENSG00000162415.6	-	4.59121	4.46941	3.68776	4.15665	4.38066	3.83847	10.6485	10.1273	9.1675	11.7253	10.4525	9.83743	11.1635	9.65627	9.19201	14.5179	11.9981	11.141
chr1	45499641	45499692	AL359473.1	ENSG00000264650.1	-	0.050564	0.203352	1.09708	0.278925	1.06513	1.88334	0.362568	0.369213	1.21264	0.988963	0.172459	0.251372	0.037318	0	0.71671	2.63915	0.529752	1.48358
chr1	45535649	45536101	OSTCP5	ENSG00000234315.1	-	0.007048	0.065066	0.027851	0.116988	0.128957	0	0	0.09277	0.208183	0.061749	0.214017	0.145587	0.171349	0.043855	0.116954	0.068503	0.102028	0.09008
chr1	45697890	45697979	AL592294.1	ENSG00000221707.2	-	0	0	0	0	0	0	0	0	0	0	0	0	0	0	0	0	0	0
chr1	45792545	45794347	HPDL	ENSG00000186603.4	+	20.0992	17.6194	16.7521	20.3513	18.4758	16.155	10.6551	8.62664	11.4688	9.56375	10.9749	10.4463	5.62826	5.14397	5.14595	5.83743	5.06802	3.28512
chr1	45794835	45806142	MUTYH	ENSG00000132781.13	-	38.0844	34.3969	32.8846	34.6943	33.4247	37.2126	37.2443	30.5546	35.7423	32.1839	35.0312	34.4692	34.2165	30.3237	38.7712	31.3634	28.3359	33.2576
chr1	45805342	45809647	TOE1	ENSG00000132773.7	+	7.69416	6.09992	7.12976	7.81784	6.86095	7.12952	10.2483	10.1031	12.3116	9.27615	10.4746	8.82794	11.1636	11.0363	8.9544	6.80117	6.48537	5.53712
chr1	45809555	45956872	TESK2	ENSG00000070759.12	-	17.6551	17.3811	15.5284	12.5615	13.0756	12.2369	10.7306	11.6064	9.81994	11.5759	11.8975	11.2147	13.7719	13.0719	12.4021	12.6749	13.0282	13.9803
chr1	45824324	45824420	snoU13	ENSG00000238945.1	-	0.367949	0	0	0.540597	0	0	0.202465	0.200128	0.08917	0.206299	0	0	0	0	0	0.460569	0.641279	0
chr1	45880692	45881016	RP11-291L19.1	ENSG00000236872.1	+	0.018249	0.031039	0.007291	0.094405	0.009496	0.121779	0.140408	0.014834	0.009272	0.009563	0.032068	0.088253	0.017763	0.015947	0.012142	0.008725	0.036976	0
chr1	45959538	45965751	CCDC163P	ENSG00000236624.4	-	2.29169	2.52645	2.07105	2.63543	2.21288	2.15397	4.4917	3.49831	3.11154	3.17408	2.48028	3.86597	5.50805	3.16646	5.56514	4.39683	4.09549	4.14286
chr1	45965725	45976739	MMACHC	ENSG00000132763.10	+	6.43923	6.64426	6.18093	6.2652	5.96374	6.69869	5.5689	6.25758	5.86585	5.07606	5.13964	5.12695	8.18704	7.09593	8.22759	5.17324	5.68713	5.76982
chr1	45976708	45988719	PRDX1	ENSG00000117450.9	-	1463.38	1539.66	1573.94	1484.45	1516.96	1519.62	1187.96	1250.43	1217.12	1227.61	1234.09	1206.6	1026.61	1079.01	1012.43	1100.43	1121.54	1079.18
chr1	45996599	45997811	HMGB1P48	ENSG00000234379.1	+	0	0	0	0	0	0	0	0	0	0.049655	0	0	0	0	0	0	0	0
chr1	46016215	46035721	AKR1A1	ENSG00000117448.9	+	201.082	200.413	200.409	207.833	198.41	200.202	132.512	130.579	144.841	137.775	130.84	126.16	152.117	152.081	145.327	136.252	152.046	143.262
chr1	46049518	46084566	NASP	ENSG00000132780.12	+	617.374	574.003	608.54	672.805	641.522	659.748	422.509	422.783	481.87	448.158	440.627	502.2	503.986	503.671	499.546	430.104	420.727	388.447
chr1	46085716	46089729	CCDC17	ENSG00000159588.10	-	1.53408	0.841413	0.729845	1.63917	1.28221	1.10885	2.69413	1.68432	1.71022	2.46143	1.55577	1.71515	1.06346	0.516148	1.1186	1.37091	1.0345	0.864017
chr1	46092976	46153785	GPBP1L1	ENSG00000159592.6	-	118.212	114.769	115.356	118.341	118.775	118.025	95.5259	92.3038	92.071	98.0429	91.7825	102.826	101.626	97.3509	99.4387	115.316	110.236	120.77
chr1	46111488	46111869	RPS15AP10	ENSG00000225447.1	-	2.6477	1.29065	2.73392	1.32088	1.73372	2.22183	1.47722	1.62643	1.82198	1.84699	2.01607	1.8763	2.31454	2.12302	2.72793	2.97979	3.14069	3.5351
chr1	46116711	46117498	RP11-767N6.2	ENSG00000234329.1	-	1.51333	1.65368	2.0825	1.84169	1.71068	1.65251	1.61333	0.92422	1.14898	1.26973	1.12913	1.78597	1.46679	1.93257	1.66972	2.97017	2.46828	3.53244
chr1	46152886	46160115	TMEM69	ENSG00000159596.6	+	51.3032	48.7032	45.8102	48.2338	46.8132	45.0415	31.3763	35.4011	32.7061	34.529	34.0595	36.247	37.1046	34.6848	37.364	35.8412	34.2995	32.3734
chr1	46159996	46216322	IPP	ENSG00000197429.6	-	6.27059	6.3935	5.98777	6.38618	5.88065	7.80431	18.6843	16.457	17.4939	20.0625	15.283	18.71	24.0047	20.0385	22.2632	21.051	18.8747	24.3992
chr1	46160356	46162747	RP11-767N6.7	ENSG00000230896.1	-	1.37211	1.91447	1.36161	1.49445	1.97807	1.64471	4.80089	4.16974	3.96131	4.20093	3.55877	4.85734	4.26854	4.55621	6.26311	4.78998	4.61933	5.67557
chr1	46246949	46247629	RP11-630I5.1	ENSG00000236111.4	+	0.273481	0.088038	0	0	0.047072	0.103754	0.054024	0.072547	0.250334	0.027805	0.003986	0.016131	0.03847	0.008508	0	0	0.070742	0
chr1	46252659	46501796	MAST2	ENSG00000086015.16	+	18.0476	17.7028	14.4005	18.9628	17.1536	17.784	21.8356	17.0517	18.7084	18.6162	14.5524	16.9542	27.7281	24.0439	28.0064	41.6675	34.3874	41.2015
chr1	46312666	46313266	TMA16P2	ENSG00000232467.2	-	0	0	0	0	0.089865	0.168661	0	0.06815	0.077065	0.123518	0	0	0	0.06611	0.178131	0.085463	0.114512	0.099749
chr1	46505812	46642160	PIK3R3	ENSG00000117461.10	-	7.1547	6.31281	6.54049	8.10251	7.73939	7.86646	11.7347	13.285	12.3067	11.326	11.9086	11.991	14.5859	16.1013	13.4841	14.6176	13.079	13.0704
chr1	46512490	46514040	RP4-533D7.4	ENSG00000226957.1	+	0	0	0	0	0	0	0	0	0	0	0	0	0	0	0	0	0	0
chr1	46570622	46570847	RP4-533D7.3	ENSG00000233114.2	+	0	0	0	0	0	0	0	0	0	0	0	0	0	0.00641	0	0	0	0
chr1	46600203	46604753	RP4-533D7.5	ENSG00000227857.2	+	0	0	0	0	0.101606	0	0.330601	0.34547	0.066667	0.179627	0.57555	0.283931	0.207505	0	0	0.113635	0.444287	0.242234
chr1	46640745	46651630	TSPAN1	ENSG00000117472.5	+	0	0	0	0	0	0	0	0.151374	0	0.050989	0	0.069532	0	0	0	0	0	0.038667
chr1	46641158	46642150	RP11-322N21.2	ENSG00000250719.1	-	0	0	0	0	0	0	0	0	0	0	0	0	0	0	0	0	0	0
chr1	46654354	46685977	POMGNT1	ENSG00000085998.9	-	24.1268	21.982	22.8837	26.2252	24.6474	23.5655	53.2993	54.9455	45.7123	49.6759	49.9003	41.9853	60.8681	66.0684	60.764	64.8116	62.3916	62.459
chr1	46669006	46686933	LURAP1	ENSG00000171357.5	+	2.11786	2.56629	2.4979	3.02891	2.66046	3.06907	3.28462	2.62703	2.1557	2.36864	1.87391	1.71962	3.7704	2.78408	3.37949	5.54035	3.13094	4.8739
chr1	46713360	46744145	RAD54L	ENSG00000085999.7	+	28.4372	25.4895	24.8136	31.7289	32.8302	31.3633	21.8558	20.1929	27.8022	19.703	18.8265	22.5455	29.3964	27.7875	28.613	26.7524	23.4984	24.7779
chr1	46726868	46769280	LRRC41	ENSG00000132128.12	-	36.0542	36.2699	33.7068	30.7806	33.2302	31.2582	53.91	53.2409	48.2562	48.9099	46.6607	41.4253	64.4935	63.1939	58.4431	67.8297	66.8842	64.925
chr1	46769303	46782448	UQCRH	ENSG00000173660.7	+	268.533	272.604	273.244	269.554	289.286	287.102	173.502	186.771	185.898	193.314	193.531	186.096	177.989	188.122	186.011	185.383	195.094	177.433
chr1	46805849	46830824	NSUN4	ENSG00000117481.6	+	13.8715	16.6741	18.7493	13.9751	14.271	15.214	11.9282	11.001	11.3181	12.4915	11.5648	11.1482	12.0024	8.6573	12.6328	11.4941	8.12889	10.2201
chr1	46836258	46836627	RP4-603I14.3	ENSG00000225779.1	+	0	0	0.075906	0.262341	0	0.151249	0	0	0	0	0	0	0	0.038032	0.047401	0	0.119472	0.022785
chr1	46859937	46879520	FAAH	ENSG00000117480.11	+	5.43753	4.32599	5.32486	5.51379	5.9662	5.86379	3.06091	4.1606	3.40831	3.57813	2.63963	3.65755	6.70734	5.95152	6.81236	5.63558	5.70628	5.54102
chr1	46897801	46911193	RP5-1109J22.1	ENSG00000232022.2	+	1.30069	0.297508	0.300411	0.266308	0.950081	0.173138	0	0	0	0.071087	0.040918	0.090486	1.58509	2.06583	1.05188	0	0.197989	0.381338
chr1	46912345	46915376	RP5-1109J22.2	ENSG00000224863.1	-	0	0	0	0	0	0	0	0	0	0	0	0	0	0	0.121362	0	0	0
chr1	46921495	46948147	LINC00505	ENSG00000225667.1	+	1.30402	0.27792	0.736344	1.05109	1.1318	0.776257	0	0	0	0	0	0.068814	5.79075	5.72589	7.544	1.94592	1.59342	2.26501
chr1	46972668	46979898	DMBX1	ENSG00000197587.6	+	0	0	0.104759	0	0.0741	0.142618	0	0.037528	0	0	0.01682	0	10.3783	10.5778	13.326	0.139142	0.360676	0.442782
chr1	47004368	47035927	MKNK1-AS1	ENSG00000269956.1	+	0.130612	0.109775	0.059662	0.071201	0.048679	0	0	0	0	0	0	0	0.298805	0.226541	0.392683	0	0	0
chr1	47011316	47017199	KNCN	ENSG00000162456.5	-	0	0	0	0	0.023399	0	0	0	0	0	0	0	0	0	0	0.022946	0	0
chr1	47023090	47082515	MKNK1	ENSG00000079277.15	-	12.5896	11.7366	12.2182	13.8488	13.8548	16.1492	11.6899	8.49382	9.08248	11.662	8.59936	11.1265	16.0288	13.7818	13.0877	20.5871	17.2742	24.0146
chr1	47073387	47082563	MOB3C	ENSG00000142961.10	-	2.75754	1.83245	1.84283	2.23343	3.7719	2.5731	1.75478	2.15051	1.40312	2.2637	2.5607	2.55218	1.67035	1.9767	2.17598	3.08855	1.59464	2.06029
chr1	47098409	47139539	ATPAF1	ENSG00000123472.8	-	39.6741	45.8558	41.2637	54.7508	39.9328	44.7011	53.7372	51.8817	49.2899	52.4051	50.0259	51.6581	76.7098	82.5564	80.3723	81.5741	80.5454	82.9755
chr1	47124366	47184824	EFCAB14	ENSG00000159658.6	-	32.4931	29.0875	27.0473	31.0166	31.5473	31.5266	41.2129	42.0604	38.7247	40.2567	39.4788	42.2521	74.7874	82.2257	79.6229	72.5979	69.0733	84.1452
chr1	47131582	47132047	RP11-8J9.1	ENSG00000233647.2	-	0	0	0.376679	0	0.016557	0.103096	0	0	0.164055	0.184697	0.005201	0.167025	0	0.061726	0.148975	0.176239	0	0.066333
chr1	47134527	47139266	TEX38	ENSG00000186118.7	+	0	0.069906	0	0.192459	0.423846	0.144487	0.070388	0.408775	0.195592	0.151238	0.072253	0.220561	0.133012	0.473955	0.204367	0.073814	0	0.496075
chr1	47139708	47157770	EFCAB14-AS1	ENSG00000228237.1	+	0	0	0	0	0	0	0	0	0	0	0	0	0	0	0	0	0	0.634531
chr1	47208001	47208805	RP11-8J9.5	ENSG00000236476.2	+	0	0	0	0	0	0	0	0	0.017677	0	0	0	0	0	0	0	0	0
chr1	47223510	47285085	CYP4B1	ENSG00000142973.8	+	0	0	0	0	0.068794	0	0	0	0	0	0	0	0.424371	0.487256	0.605778	1.32586	2.7962	2.77769
chr1	47308767	47366109	CYP4Z2P	ENSG00000154198.10	-	0	0	0	0	0	0	0	0	0	0	0	0	0	0	0	0	0	0.064016
chr1	47357311	47358502	RP11-346M5.1	ENSG00000238145.2	+	0.056186	0	0.013744	0	0	0.013804	0	0.022883	0.037296	0.022925	0.002169	0.013209	0.02252	0	0	0	0.003553	0.017812
chr1	47394849	47407156	CYP4A11	ENSG00000187048.8	-	0	0	0.034517	0	0	0	0.032649	0.033053	0.049848	0	0.070221	0.031156	0.324636	0.515964	0.691952	0.255194	0.281333	0.264226
chr1	47427036	47516423	CYP4X1	ENSG00000186377.6	+	2.29862	2.45131	2.10398	2.76858	2.26268	2.05584	2.99476	2.19808	2.48635	3.09668	2.10775	2.02193	8.00061	10.7465	9.66193	6.19081	4.35217	6.12604
chr1	47433351	47433546	RP11-346M5.6	ENSG00000259832.1	-	0	0	0	0	0	0	0	0	0	0	0	0	0	0	0	0	0	0
chr1	47460054	47460174	RP11-346M5.5	ENSG00000261196.1	-	0	0	0	0	0	0	0.077907	0	0	0	0	0	0	0	0	0	0	0
chr1	47466570	47466759	RP11-346M5.4	ENSG00000261593.1	-	0	0	0	0	0	0	0	0	0	0	0	0	0	0	0.271152	0	0.068264	0
chr1	47468667	47468820	RP11-346M5.3	ENSG00000261290.1	-	0	0	0	0	0	0	0	0	0	0	0	0.126032	0	0	0	0.198031	0	0
chr1	47533160	47583991	CYP4Z1	ENSG00000186160.4	+	0	0	0	0	0	0	0	0	0	0	0	0	0.135664	0	0	0.130109	0.08902	0
chr1	47540450	47541651	RP11-184J23.2	ENSG00000225154.2	-	0.041527	0	0.004503	0	0	0.013689	0.003703	0.022693	0.036985	0.022734	0.002151	0.013099	0.050181	0	0	0.004451	0.006166	0.017664
chr1	47562325	47644943	CYP4A22-AS1	ENSG00000225506.2	-	0.095457	0.204016	0.169863	0.390071	0.251022	0.545141	1.93733	1.50253	1.08606	1.08661	0.864232	1.12573	1.57391	1.50339	2.03439	1.59522	1.44851	1.56489
chr1	47603107	47615413	CYP4A22	ENSG00000162365.7	+	0	0	0	0	0	0	0	0	0	0.024947	0.029831	0	0.165921	0.061143	0.168407	0.137715	0.121751	0.093485
chr1	47630182	47631592	MTND1P34	ENSG00000225514.1	-	0	0	0	0	0	0	0	0	0	0	0	0	0	0	0	0	0	0
chr1	47644922	47646011	LINC00853	ENSG00000224805.2	+	0	0	0	0	0	0	0.149744	0.657397	0.419998	0.617195	0.999565	0.213331	0.479995	1.22441	0.433373	0.857184	0.376824	0.573451
chr1	47649265	47656716	PDZK1IP1	ENSG00000162366.3	-	0	0	0	0	0.114494	0	0	0	0	0	0	0	0.061335	0	0	0.063565	0.089466	0
chr1	47681962	47697892	TAL1	ENSG00000162367.7	-	0	0.019092	0.026069	0.034921	0	0	0	0.021554	0.038387	0.029259	0.009679	0.035355	0.061659	0.069172	0.059462	0.035523	0.085678	0.01621
chr1	47691469	47696422	RP1-18D14.7	ENSG00000226252.1	+	0	0	0	0	0	0	0	0	0	0	0	0	0	0	0	0	0	0
chr1	47715811	47779819	STIL	ENSG00000123473.11	-	18.2755	16.3842	17.9114	19.0778	18.1865	19.9865	51.9582	50.7166	51.0037	47.4735	50.3711	52.1099	32.5675	33.326	30.8554	35.7017	35.4969	37.5204
chr1	47799469	47844511	CMPK1	ENSG00000162368.9	+	38.3629	38.6331	39.791	39.7485	38.2928	38.7225	54.5068	56.3552	54.7286	57.7607	56.9754	61.9387	47.3551	44.1264	43.4878	48.2902	48.9769	46.7136
chr1	47846600	47874149	RP11-511I2.2	ENSG00000225762.1	-	0	0	0.082224	0	0	0	0	0	0	0.112709	0	0	0	0	0	0	0	0
chr1	47881744	47883723	FOXE3	ENSG00000186790.4	+	0.073164	0	0.079787	0.054094	0.132907	0.026531	0.124447	0	0.030156	0	0.023258	0.015304	0	0	0	0	0.020855	0
chr1	47897805	47900313	FOXD2-AS1	ENSG00000237424.1	-	0.071022	0.039433	0.112987	0.246241	0.217896	0.085746	0.663351	0.44042	0.816803	0.615843	0.740164	0.299089	0.476334	0.364967	1.02624	0.553691	0.422314	0.490688
chr1	47901689	47906363	FOXD2	ENSG00000186564.5	+	0	0	0.007228	0	0.039491	0	0.140029	0.089025	0.099192	0.068993	0.076264	0.087693	0.070824	0.099021	0.15897	0.016251	0.007191	0
chr1	47949370	47949834	RP4-666O22.3	ENSG00000271355.1	-	0	0	0	0	0	0	0	0	0	0	0	0	0	0	0	0	0	0
chr1	47963566	47964013	RPL21P24	ENSG00000229554.2	-	0	0	0	0	0	0	0	0	0	0	0	0.03625	0	0	0	0	0	0
chr1	47968176	47968311	AL356458.1	ENSG00000221346.1	+	0	0	0	0	0	0	0	0	0	0	0	0	0	0	0	0	0	0
chr1	48015868	48016425	ATP6V0E1P4	ENSG00000227883.1	+	0	0	0	0	0	0	0	0	0.106071	0	0	0	0	0	0	0	0	0
chr1	48086765	48086849	AL591415.1	ENSG00000221447.1	-	0	0	0	0	0	0	0	0	0	0	0	0	0	0	0	0	0	0
chr1	48154135	48169055	RP11-543D5.1	ENSG00000227947.1	+	0	0	0.265183	0	0	0	0.369167	1.25481	0.446422	0.686438	0.422296	0.515903	0	0.059416	0	0	0	0.15286
chr1	48226200	48462567	TRABD2B	ENSG00000269113.3	-	2.99245	1.88403	2.17579	2.49037	2.13685	2.11359	6.2242	5.31873	5.74706	3.4488	3.22796	3.88845	7.6376	5.00631	6.33362	1.47492	1.04596	3.00186
chr1	48226804	48231219	RP11-543D5.2	ENSG00000223814.1	-	0.006195	0.000628	0.00156	0.010266	0.010432	0.003606	0.010064	0.013403	0.012492	0.001865	0.006397	0.006307	0.015031	0.015395	0.003047	0.009056	0.000317	0
chr1	48226979	48227290	FLJ00388	ENSG00000273395.1	-	5.6e-05	0.00011	3.7e-05	0.000491	6.6e-05	4.9e-05	0.000419	0.00108	0.000201	0.000402	5.5e-05	9.4e-05	9e-05	6.5e-05	0.000525	3e-06	0	2.7e-05
chr1	48283738	48285909	RP11-330M19.1	ENSG00000225028.1	+	0	0	0	0	0	0	0	0	0	0	0	0	0	0	0	0	0	0
chr1	48519217	48532873	RP4-683M8.2	ENSG00000226133.1	+	0	0	0	0	0	0	0	0	0	0	0	0	0.044578	0	0	0	0	0
chr1	48544459	48547868	RP11-193P11.3	ENSG00000231413.1	-	0	0	0	0	0	0	0	0	0	0	0	0	0	0	0	0	0	0
chr1	48555040	48555306	CYP46A4P	ENSG00000237180.1	+	0	0	0	0	0	0	0	0	0.208999	0	0	0	0	0	0	0	0	0
chr1	48561764	48648100	SKINTL	ENSG00000242267.2	-	0.360333	0.399361	0	0	0	0.71242	5.02791	4.65464	3.29023	5.11006	4.82249	6.67502	2.76323	2.45313	3.01073	1.65193	0.739571	0.685022
chr1	48569306	48569878	AL109659.1	ENSG00000269709.1	+	0	0	0	0	0	0	0.01371	0	0.050641	0	0.064718	0.043205	0.013123	0	0	0	0	0
chr1	48671637	48672515	RP5-1024N4.2	ENSG00000223720.1	+	0	0	0	0	0	0	0	0	0	0	0	0	0	0	0	0	0	0
chr1	48688357	48714316	SLC5A9	ENSG00000117834.8	+	0.239559	0.026912	0	0	0.02186	0.022762	24.5042	21.1076	19.458	22.1133	16.7037	19.7129	10.958	7.67867	8.27717	2.24616	1.83932	2.04755
chr1	48693560	48695233	RP5-1024N4.4	ENSG00000272491.1	-	0.032444	0	0.026214	0.02716	0.014486	0	0.311671	0.487994	0.246918	0.289339	0.292956	0.388783	0.118431	0.192587	0.256371	0.084016	0.057374	0.14336
chr1	48761044	48937845	SPATA6	ENSG00000132122.7	-	6.78835	6.36158	6.51102	6.4998	6.75099	6.06463	27.2925	24.5323	25.8544	28.3767	24.9577	29.9584	32.2044	28.5043	31.9011	33.4514	28.5055	32.7674
chr1	48790752	48791795	PPP1R8P1	ENSG00000224986.2	-	0	0.053091	0	0	0	0.03818	0.040131	0.14242	0.137636	0	0.164369	0.049513	0	0.173242	0.219089	0.256498	0.084937	0.344533
chr1	48809881	48809987	RNU6-723P	ENSG00000206700.1	+	0	0	0	0	0	0	0	0	0	0	0	0	0	0	0	0	0	0
chr1	48901639	48902895	RP11-329A14.1	ENSG00000235105.1	+	1.70784	1.58246	1.94733	2.06476	1.8876	2.32181	1.88079	2.21351	2.04018	1.73516	2.20833	2.09459	1.94204	2.40131	2.28211	1.81809	1.88907	1.73099
chr1	48913608	48913714	RNU4-61P	ENSG00000223175.1	+	0	0	0	0	0	0	0	0	0	0	0	0	0	0	0	0	0	0
chr1	48962935	48963408	RP11-329A14.2	ENSG00000232514.1	-	0	0	0	0	0	0	0.329804	0.27138	0.322573	0.136185	0.207092	0.141644	0	0.066797	0	0	0.187076	0.111324
chr1	48998527	50489585	AGBL4	ENSG00000186094.12	-	0.348322	0.30378	0.29039	0.25091	0.373033	0.139824	0.190682	0.355917	0.420168	0.359082	0.365782	0.296275	0.364329	0.538132	0.359307	0.415571	0.418896	0.559556
chr1	49193195	49242641	BEND5	ENSG00000162373.8	-	16.4739	17.3743	16.0484	14.4133	17.5151	18.5662	5.19228	5.09014	5.13301	5.19792	4.43815	5.50994	6.48633	7.00523	5.86902	7.18022	6.34208	6.80319
chr1	49513988	49653257	RP11-141A19.1	ENSG00000229846.1	+	0	0	0	0	0	0	0	0	0	0	0	0	0	0	0	0	0	0
chr1	49617064	49617175	snoU13	ENSG00000239144.1	+	0	0	0	0	0	0	0	0	0	0	0	0	0	0	0	0	0	0
chr1	49723083	49734957	RP11-141A19.2	ENSG00000230114.1	+	0	0	0	0	0	0	0	0	0	0	0	0	0	0	0	0	0	0
chr1	49839873	49937757	AGBL4-IT1	ENSG00000225623.1	-	0	0	0	0	0	0	0	0	0	0	0	0	0	0	0	0	0	0
chr1	50156934	50157195	RP5-926E3.1	ENSG00000237478.2	-	0	0	0	0	0	0	0	0	0	0	0	0	0	0	0	0	0	0
chr1	50307493	50312072	ZNF859P	ENSG00000215887.5	+	0	0	0	0	0	0	0	0.007595	0	0	0.010356	0.008563	0.030475	0	0	0	0	0.004023
chr1	50447887	50447967	AL645730.1	ENSG00000221746.1	+	0	0	0	0	0	0	0	0	0	0	0	0	0	0	0	0	0	0
chr1	50459990	50461874	AL645730.2	ENSG00000227839.1	+	0	0	0	0	0	0	0	0	0	0	0	0	0	0	0	0	0	0
chr1	50482764	50483175	MTND2P29	ENSG00000233595.2	+	0	0	0	0	0	0	0	0	0	0	0	0	0	0	0	0	0	0
chr1	50513686	50669458	ELAVL4	ENSG00000162374.12	+	0.376259	0.736594	0.63309	0.454551	0.627704	0.845809	4.26802	3.24553	2.73706	5.02024	4.95904	5.23205	7.88984	7.73048	7.52594	7.31443	7.15447	6.80535
chr1	50580609	50580954	RP11-492I2.1	ENSG00000230828.1	+	0	0	0	0	0	0	0	0	0	0	0	0	0	0	0	0	0	0
chr1	50639978	50641540	RP11-567C20.2	ENSG00000237337.1	-	0	0	0	0	0	0	0	0	0	0	0	0	0	0	0	0	0	0
chr1	50671756	50688799	RP11-567C20.3	ENSG00000233407.1	-	0	0	0	0	0	0	0	0	0	0	0	0	0	0	0	0	0	0
chr1	50791803	50792682	RP11-183G22.1	ENSG00000234080.2	+	0.056894	0	0.266704	0.073778	0.190009	0.17407	0	0.008291	0.298217	0	0	0.018442	0.105407	0	0.004821	0	0	0
chr1	50864497	50865445	HMGB1P45	ENSG00000229316.1	-	0	0	0	0	0	0	0	0	0	0	0	0	0	0	0	0	0	0
chr1	50871102	50871696	FCF1P6	ENSG00000225671.2	-	0.085567	0	0.169817	0	0	0	0	0	0	0	0	0.03728	0.079089	0.057502	0	0	0	0.091309
chr1	50883222	50889172	DMRTA2	ENSG00000142700.7	-	0	0	0	0	0	0	0.028381	0	0	0.088569	0	0.065217	0.951829	0.768381	0.894761	2.79412	2.2412	2.46857
chr1	50902700	50902978	RP5-850O15.4	ENSG00000271782.1	-	0.943447	1.03405	0.416811	0.614835	0.570864	0.381293	0.850324	0.309663	0.470024	0.414148	0.452606	0.655199	0.225178	0.461347	0.918038	0.625163	0.52655	0.043646
chr1	50905150	51425935	FAF1	ENSG00000185104.15	-	28.6863	28.1172	28.4542	26.8266	26.7956	28.1598	25.1449	25.7186	26.2172	26.2078	27.05	27.5862	32.1468	35.551	32.8102	31.0307	34.3856	31.9297
chr1	50927141	50936822	RP5-850O15.3	ENSG00000225767.1	+	0	0	0	0	0	0	0	0	0	0	0	0	0	0	0	0	0	0
chr1	50965430	50965529	Y_RNA	ENSG00000202140.1	-	0	0	0	0	0	0	0	0	0	0	0	0	0	0	0	0	0	0
chr1	51048076	51048183	RNU6-1026P	ENSG00000207194.1	+	0	0	0	0	0	0	0	0	0	0	0	0	0	0	0	0	0	0
chr1	51215968	51216025	RNU6-1253P	ENSG00000252825.1	+	0	0	0	0	0	0	0	0	0	0	0	0	0	0	0	0	0	0
chr1	51246012	51246822	PHBP12	ENSG00000230585.2	+	0	0	0	0	0	0	0	0	0	0	0	0	0	0	0	0	0	0
chr1	51312140	51312509	MRPS6P2	ENSG00000237130.1	+	0	0	0	0	0	0	0	0	0	0	0	0	0	0	0	0	0	0
chr1	51426417	51440305	CDKN2C	ENSG00000123080.6	+	0	0	0	0	0	0	0.135346	0.193894	0.076095	0.157715	0.544929	0.35336	0.151395	0.233125	0.240201	0	0.127427	0.218176
chr1	51525509	51525577	MIR4421	ENSG00000265538.1	+	0	0	0	0	0	0	0	0	0	0	0	0	0	0	0	0	0	0
chr1	51567906	51613752	C1orf185	ENSG00000204006.4	+	0	0	0	0	0	0	0	0	0	0	0	0	0	0	0	0	0	0
chr1	51572894	51573003	Y_RNA	ENSG00000200262.1	+	0	0	0	0	0	0	0	0	0	0	0	0	0	0	0	0	0	0
chr1	51623460	51624143	CFL1P2	ENSG00000213478.2	-	0.061004	0.180707	0.046834	0	0	0.029716	0	0.014346	0	0.062916	0	0	0.068089	0.084107	0.162926	0.134736	0	0.116403
chr1	51654135	51654223	AL162430.2	ENSG00000239101.1	+	0	0	0	0	0	0	0	0	0	0	0	0	0	0	0	0	0	0
chr1	51656555	51656630	AL162430.1	ENSG00000221492.1	+	0	0	0	0	0	0	0	0	0	0	0	0	0	0	0	0	0	0
chr1	51660767	51700768	RP11-296A18.3	ENSG00000203356.2	-	0	0	0	0	0	0.019078	0.025123	0.093228	0.052006	0	0	0	0.104675	0	0	0.067049	0.105051	0.09396
chr1	51696925	51697028	snoU13	ENSG00000238618.1	-	0	0	0	0	0	0	0	0	0	0	0.17712	0	0	0	0	0	0	0
chr1	51701943	51739127	RNF11	ENSG00000123091.4	+	43.9512	39.9145	39.3409	42.0023	44.4092	41.07	85.8503	84.3944	84.1719	83.6709	86.3165	90.223	92.4702	96.8768	96.9617	114.416	120.613	124.803
chr1	51716270	51717144	RP11-296A18.5	ENSG00000233406.4	-	0.488806	0.341576	1.11197	0.862589	0.943604	1.2394	0.609119	0.62873	0.494016	0.809887	0.923419	0.655594	0.328352	0.613147	0.752968	0.440417	1.12511	0.47472
chr1	51730588	51731746	RP11-296A18.6	ENSG00000236434.2	-	0	0	0	0	0	0	0	0	0	0	0.088035	0	0.081413	0	0	0	0	0
chr1	51752930	51810788	TTC39A	ENSG00000085831.11	-	3.83866	3.66561	3.66261	3.625	4.06228	4.8631	9.17535	9.24229	7.87838	9.17301	8.55581	7.99461	13.4338	13.9995	13.7833	17.0015	14.7772	16.4368
chr1	51795326	51800996	RP11-275F13.1	ENSG00000261664.1	+	0	0	0	0.086397	0	0	0	0.348975	0.121875	0	0	0	0	0.074794	0.085046	0.169437	0.166872	0.06146
chr1	51819935	51985000	EPS15	ENSG00000085832.12	-	34.3254	33.2088	34.119	35.8628	34.115	35.2725	35.7403	36.3289	37.1661	37.9578	37.0294	41.4075	32.6283	30.9998	31.5643	39.4013	40.2177	45.1933
chr1	51837942	51838896	RP11-275F13.3	ENSG00000232027.2	+	0	0	0	0	0	0	0	0	0	0	0	0	0	0	0	0	0	0
chr1	51847980	51848086	RNU6-877P	ENSG00000206595.1	+	0	0	0	0	0	0	0	0	0	0	0	0	0	0	0	0	0	0
chr1	51927393	51929088	RP11-253A20.1	ENSG00000238140.1	+	0	0	0	0	0	0	0	0	0	0	0	0	0	0	0	0	0	0
chr1	51983981	52027301	RP11-191G24.1	ENSG00000227070.1	+	0	0.090205	0.193602	0	0.845037	0	0.712656	1.37453	0.529579	0.52543	0.180593	0.817832	0	0.107933	0	0	0.44843	0.146933
chr1	52004297	52004401	RNU6-1281P	ENSG00000252032.1	-	0	0	0	0	0	0	0	0	0	0	0	0	0	0	0	0	0	0
chr1	52027538	52060569	CALR4P	ENSG00000227742.1	-	0	0	0	0	0	0	0	0	0	0	0	0	0	0	0	0	0	0
chr1	52042851	52254889	OSBPL9	ENSG00000117859.14	+	78.9107	80.984	80.25	79.8829	77.5912	79.6457	87.955	91.1974	90.2568	99.2287	94.2746	106.932	107.231	116.735	114.099	115.467	121.309	120.084
chr1	52172810	52173809	GAPDHP51	ENSG00000236973.2	-	0	0	0	0	0	0	0	0	0	0	0	0	0	0	0	0	0	0
chr1	52174734	52175612	SLC25A6P3	ENSG00000232846.1	+	0	0	0	0.326523	0	0	0.117969	0	0	0	0	0	0	0	0	0	0	0
chr1	52190447	52190568	SNORA26	ENSG00000212624.1	-	0	0	0	0	0	0	0	0	0	0	0	0	0	0	0	0	0	0
chr1	52254863	52344477	NRD1	ENSG00000078618.15	-	167.825	179.542	175.435	182.303	174.496	173.38	141.567	149.479	151.158	172.908	149.483	161.058	166.547	172.827	165.499	230.721	230.671	249.074
chr1	52259637	52264824	RP4-657D16.3	ENSG00000266993.1	+	0.138573	0.151103	0.110052	0.627886	0.217826	0.544037	0.276568	0	0.12466	0	0.266175	0.537123	0	0.28457	0	0.45801	0.207404	0
chr1	52266700	52266979	RP4-657D16.6	ENSG00000272175.1	+	0.077931	0.092049	0.162994	1.61777	0	0.056851	0	0.391975	0	0.103331	0	0.135519	0.173729	0	0	0.224652	0	0
chr1	52302013	52302082	MIR761	ENSG00000212076.1	-	8e-06	9e-06	6e-06	1.7e-05	1e-05	1.3e-05	0.209505	0.085337	8e-06	0.015373	1e-05	0.079227	0.003475	2e-06	0.146191	0.321091	1.5e-05	0.285504
chr1	52325450	52325807	TSEN15P2	ENSG00000230604.2	+	0	0	0	0	0	0	0.083384	0	0	0	0	0	0	0	0	0	0	0
chr1	52331305	52331381	Y_RNA	ENSG00000212174.1	+	0	0	0	0	0	0	0	0	0	0	0	0	0	0	0	0	0	0
chr1	52366592	52366643	AL589663.1	ENSG00000265769.1	-	0	0	0.156122	0	0	0	0	0	0	0	0.242374	0	0	0	0.534019	0.267516	0	0
chr1	52373628	52456436	RAB3B	ENSG00000169213.6	-	21.7885	19.9373	18.7476	24.0085	21.1154	22.6451	70.0657	65.8961	62.5362	70.1104	63.595	77.8184	60.8088	61.3616	61.482	175.856	169.559	205.915
chr1	52439082	52439207	RNA5SP48	ENSG00000200839.1	+	0	0	0	0	0	0	0	0	0	0	0	0	0	0	0	0	0	0
chr1	52446145	52446486	RP11-91A18.1	ENSG00000229032.1	+	0	0	0	0	0	0	0	0	0	0	0	0	0	0	0	0	0	0
chr1	52461412	52461709	RN7SL290P	ENSG00000264613.1	+	0	0	0	0	0	0	0	0	0	0	0	0	0	0	0	0	0	0
chr1	52485803	52521843	TXNDC12	ENSG00000117862.7	-	85.297	91.0685	86.3869	79.1642	81.7672	81.0188	62.7929	65.4589	60.3625	74.3098	70.4579	70.9803	111.291	124.696	116.482	275.457	296.226	327.603
chr1	52497775	52499488	KTI12	ENSG00000198841.3	-	5.8018	4.55119	5.22872	6.16418	5.3753	5.299	6.70879	8.09599	8.7397	9.22529	8.42705	8.30482	11.3841	10.7871	9.99245	14.6136	16.9382	14.2284
chr1	52499063	52509951	RP11-91A18.4	ENSG00000223390.1	+	0.286908	0	0	0	0	0	0	0	0.172637	0.208116	0	0.20292	0	0	0.16991	0	0.118746	0
chr1	52516590	52518355	TXNDC12-AS1	ENSG00000228369.2	+	0	0	0	0	0	0	0	0	0	0	0	0	0	0	0	0	0	0
chr1	52521797	52556388	BTF3L4	ENSG00000134717.13	+	88.8017	102.459	109.057	109.524	111.856	84.8621	84.4935	90.114	83.9599	85.4687	84.8346	94.4021	110.116	111.312	103.802	146.711	170.396	160.384
chr1	52608046	52812358	ZFYVE9	ENSG00000157077.10	+	24.3239	25.1576	24.4825	26.1185	26.2891	27.0946	30.9997	31.6585	30.8433	29.2707	29.2755	31.5017	33.1652	37.7091	36.7707	38.2726	43.4978	47.3692
chr1	52615777	52616089	RN7SL788P	ENSG00000241745.2	+	0	0	0	0	0	0	0	0	0	0.117554	0	0	0	0.041652	0	0.020578	0	0
chr1	52625933	52626272	RP4-800M22.1	ENSG00000228407.2	-	0.171354	0.262873	0.111644	0.335531	0.350928	1.72113	0.301903	0.256302	0.616296	0.906886	0.706813	0.860937	0.706295	0.608947	0.49649	0.94424	0.408011	0
chr1	52627858	52628698	RP4-800M22.2	ENSG00000223429.1	-	0	0	0	0	0	0	0	0	0	0	0	0	0	0	0	0	0	0
chr1	52645520	52646225	PDCL3P6	ENSG00000224255.2	+	0	0.110305	0.055942	0.076645	0	0.072552	0.014094	0.029007	0	0	0	0.109405	0	0	0	0	0.255765	0
chr1	52655588	52655981	RP4-800M22.4	ENSG00000236004.2	-	0	0	0	0	0	0	0	0	0	0	0	0	0	0	0	0	0	0
chr1	52717734	52718445	DNAJC19P7	ENSG00000237663.2	-	0	0	0.018497	0	0	0	0	0	0	0	0	0	0	0	0	0	0	0
chr1	52719293	52719848	ANAPC10P1	ENSG00000213735.2	+	0	0.082244	0.16614	0	0.143725	0	0.028729	0.116253	0	0.065403	0	0.111493	0.078092	0.015632	0	0	0.284282	0.381868
chr1	52811395	52831865	CC2D1B	ENSG00000154222.10	-	7.22548	7.46455	7.50308	9.97329	9.31459	9.00617	16.2378	13.4263	15.5495	13.1839	12.5254	15.0633	18.534	14.6748	15.1414	23.1524	19.6913	20.8465
chr1	52819159	52819549	RP11-155O18.6	ENSG00000272100.1	+	0.158025	0	0	0.345105	0.079656	0.16424	0.002893	0	0	0.086701	0.001941	0.12338	0.002718	0	0.135934	0.216662	0	0.51574
chr1	52834349	52834916	PLA2G12AP1	ENSG00000224680.4	+	0.838589	0.587941	0.615368	0.242586	0.55863	0.485188	0.619369	0.620816	1.15732	0.890425	0.272885	0.50855	0.793678	0.661074	0.551289	0.21194	0.801551	0.430695
chr1	52838501	52870131	ORC1	ENSG00000085840.8	-	52.489	53.9438	48.2251	52.7234	54.7182	53.1611	20.9954	21.4792	23.8262	21.4928	22.2852	21.6681	24.2543	26.6932	24.0573	22.0592	22.4819	20.0622
chr1	52870236	52886511	PRPF38A	ENSG00000134748.12	+	37.4999	32.976	35.5917	40.3778	39.226	40.5805	42.7933	44.5206	44.3699	40.9815	41.326	47.1916	39.6519	35.4734	39.0236	39.35	38.1997	40.938
chr1	52873954	53019159	ZCCHC11	ENSG00000134744.9	-	38.4357	29.2425	32.3544	35.6093	35.1892	38.8263	65.9113	72.2939	65.2541	67.8148	55.1714	75.401	64.5666	58.9929	58.9471	60.3471	54.7332	58.7309
chr1	52877114	52877194	snoU13	ENSG00000239063.1	+	2.02496	0.547432	0.582399	0.206611	1.51726	0.72022	1.67134	0.600465	0.40302	0.430344	0.296235	0	1.46438	1.38725	0.884134	2.14343	2.23523	4.03976
chr1	53020490	53020945	RP11-25O10.2	ENSG00000272371.1	+	0	0.446094	0.007699	0	0	0.102463	0.28827	0.13707	0.361005	0.150054	0.288617	0.315317	0.26012	0.2142	0.11298	0.214717	0	0
chr1	53038786	53039488	EEF1GP7	ENSG00000236290.1	+	0	0	0	0	0.186578	0.016897	0.14862	0	0.2425	0.462482	0.308915	0	0.182873	0.196047	0.32848	0.225277	0.178097	0.258048
chr1	53068044	53074723	GPX7	ENSG00000116157.5	+	17.3064	14.389	16.2638	17.5095	16.8357	15.9324	28.1071	29.1318	26.0898	28.825	30.0383	28.1471	34.8862	42.332	42.7031	29.8307	35.4405	30.0823
chr1	53099016	53135355	FAM159A	ENSG00000182183.10	+	0.719348	0.515558	0.802329	0.803039	1.10502	1.04877	2.94423	2.22372	2.42404	1.97356	1.06711	1.13058	1.83767	1.7757	1.79707	0.816379	0.400882	0.501625
chr1	53152508	53164038	SELRC1	ENSG00000162377.4	-	31.0989	31.5322	30.6104	37.6357	31.5733	35.3917	24.0819	24.6552	27.9787	24.2903	23.5133	24.6388	30.3881	33.1261	30.2552	26.7296	27.5361	23.9203
chr1	53174794	53175114	NDUFS5P3	ENSG00000233664.1	+	0	0	0	0.028675	0	0	0	0.034557	0	0	0	0.009255	0	0	0	0	0	0.007781
chr1	53180071	53180365	RN7SL62P	ENSG00000239640.2	+	0	0	0	0	0	0	0	0	0	0	0	0	0	0	0	0	0	0
chr1	53192126	53293014	ZYG11B	ENSG00000162378.8	+	13.2164	12.4112	13.5361	13.7034	12.6352	14.4031	17.1154	18.5545	16.7002	17.2235	16.6345	17.3291	20.1302	22.0507	19.5271	20.5189	21.7351	20.7305
chr1	53219994	53220134	RNU2-30P	ENSG00000252018.1	+	0.383415	0	0	0	0	0	0.167141	0.030259	0	0	0	0	0	0	0	0	0	0
chr1	53237866	53238320	RP11-159C21.4	ENSG00000228929.1	-	11.841	10.1606	11.3532	12.1075	9.91667	17.9716	7.03929	9.65651	10.4937	10.507	11.9901	12.0584	7.58379	7.10391	9.96328	7.26008	6.95603	8.69896
chr1	53270780	53270884	RNU6-969P	ENSG00000206627.1	-	0	0	0	0	0	0	0	0	0	0	0	0	0	0	0	0	0	0
chr1	53308183	53360670	ZYG11A	ENSG00000203995.5	+	1.54718	1.46636	1.98422	2.07256	1.40115	1.31927	0.430592	0.439067	0.474884	0.654471	0.592165	0.59133	0.687804	0.816178	0.652605	0.858458	0.943946	1.34196
chr1	53346888	53347402	RP4-631H13.2	ENSG00000242391.2	-	0	0	0	0	0	0	0.168278	0	0	0	0	0	0	0	0	0	0	0
chr1	53361656	53392884	ECHDC2	ENSG00000121310.12	-	17.477	16.1268	12.6687	16.0186	15.0946	17.9761	19.7276	14.3084	15.686	21.0599	14.2196	20.8885	44.7767	38.548	42.6776	43.8516	42.4671	49.3274
chr1	53386094	53386268	RP4-631H13.6	ENSG00000230953.2	+	0.082479	0.059387	0.06269	0.211186	0.15746	0.206729	0.14921	0.032303	0.149337	0.016426	0.117497	0.125846	0.142074	0.065034	0.031196	0.156688	0.128053	0.016054
chr1	53390921	53391095	RP4-631H13.4	ENSG00000231866.2	-	0	0	0	0	0	0	0	0	0	0	0	0	0	0	0	0	0	0
chr1	53392901	53517375	SCP2	ENSG00000116171.12	+	31.8549	35.3337	51.2564	47.3769	72.4955	50.8095	33.751	59.8995	69.4851	55.4588	36.4737	39.5057	76.0669	82.5945	57.2183	55.9436	45.6939	56.742
chr1	53394346	53394444	MIR1273F	ENSG00000264834.1	+	0	0.061586	0	0	0	0	0	0	0.484752	0	0	0	0	0	0	0.186451	0	0
chr1	53400602	53400689	MIR5095	ENSG00000266188.1	+	0	0	0	0	0	0	0	0	0	0	0	0	0	0	0	0	0	0
chr1	53405986	53406085	MIR1273G	ENSG00000265815.1	+	0	0	0	0	0	0	0	0	0	0	0	0	0	0	0	0	0	0
chr1	53409208	53409602	RP4-631H13.5	ENSG00000237279.2	-	0	0	0	0	0	0	0	0	0	0	0	0	0	0	0	0	0	0
chr1	53458868	53459374	RP11-334A14.2	ENSG00000236360.1	-	3.01373	4.02578	2.88909	2.51077	1.97763	5.03812	5.6983	2.31181	2.24639	3.71095	3.12031	2.55242	2.00436	1.33059	3.85237	4.02345	5.07761	3.55263
chr1	53460398	53461698	TUBBP10	ENSG00000226147.1	+	0.021117	0.044746	0.031173	0.022365	2.7e-05	0.011157	0.061953	0.030797	0.000306	0.004303	0.003229	0.016144	0.030274	0.041547	0.18699	0.16347	0.483721	0.184845
chr1	53527854	53551174	PODN	ENSG00000174348.9	+	0.094419	0	0.127965	0	0.088805	0.179649	0	0	0	0	0	0	0.470225	0.359743	0.442529	0	0.03656	0.14429
chr1	53535610	53551174	RP11-334A14.5	ENSG00000232993.1	-	0	0	0	0	0	0	0	0	0	0	0	0	0	0	0	0	0	0
chr1	53538782	53539061	HIGD1AP11	ENSG00000227644.2	-	0	0	0	0	0	0	0	0	0	0	0	0	0	0	0	0	0	0
chr1	53552855	53608289	SLC1A7	ENSG00000162383.7	-	0	0	0	0	0	0	0	0	0	0	0.020805	0	0.392628	0.27021	0.323181	0	0	0.071043
chr1	53580248	53584281	RP11-334A14.8	ENSG00000235563.1	+	0	0	0	0	0	0	0	0	0	0	0	0	0.058462	0	0	0	0	0
chr1	53662101	53679869	CPT2	ENSG00000157184.5	+	18.6619	17.8752	17.4678	18.0947	18.3311	17.0432	23.7517	22.7404	23.2029	24.0927	23.512	21.9561	25.9807	26.255	25.0958	22.5644	21.7212	21.3673
chr1	53676128	53679447	RP5-1024G6.2	ENSG00000236723.1	-	0.086657	0.081339	0.072617	0.108967	0.079992	0.209518	0.13596	0.07832	0.056043	0.132215	0.203618	0.123755	0.203153	0.211805	0.214492	0.139598	0.183921	0.09484
chr1	53679771	53686289	C1orf123	ENSG00000162384.9	-	49.6029	53.8362	51.5092	48.8449	49.605	52.9674	62.677	66.703	63.5216	63.8112	65.5033	61.5754	85.172	86.2953	84.8694	83.3396	88.1178	86.963
chr1	53686335	53689925	RP5-1024G6.7	ENSG00000259818.1	+	0	0.056415	0.010143	0.008622	0.024478	0.043077	0.014438	0	0.04219	0.048415	0.049474	0.017373	0.025668	0.064773	0.057183	0.076731	0.043048	0
chr1	53692564	53704282	MAGOH	ENSG00000162385.6	-	92.7679	94.5285	101.182	100.387	102.794	105.979	86.9541	96.9332	89.2266	89.8912	96.5518	92.8915	95.8101	108.306	98.4859	87.6147	83.6133	81.7291
chr1	53704282	53708455	RP5-1024G6.5	ENSG00000226754.1	+	0	0.510336	0.233354	0.360288	0.204474	0.098383	0.365955	0.659652	0.761346	0.493145	0.432114	0.648735	0.957438	0.609358	0.5415	1.13569	0.69083	0.716623
chr1	53708036	53710212	RP5-1024G6.8	ENSG00000270172.1	-	8.04108	6.15433	6.23444	10.2346	9.00506	10.6303	23.3166	19.2338	25.0443	20.8918	19.4928	29.3194	8.69661	6.58329	6.41227	8.56362	6.38555	5.17808
chr1	53711217	53793742	LRP8	ENSG00000157193.10	-	61.7986	57.0558	51.4704	67.4053	65.4265	67.752	54.2327	41.9301	58.3622	53.1996	44.8517	60.5037	32.1235	23.2963	25.6078	36.6079	28.5437	32.4809
chr1	53733607	53734273	RP4-784A16.1	ENSG00000234578.1	+	0	0	0	0	0	0	0	0	0	0	0	0	0.011298	0	0	0	0	0
chr1	53753696	53755378	RP4-784A16.2	ENSG00000228838.1	+	0	0	0	0	0	0	0.004247	0	0	0	0	0	0	0	0	0.000902	0	0
chr1	53757463	53757810	RP4-784A16.3	ENSG00000225030.1	-	0.15281	0.463065	0.137945	0.687309	0.332527	0.657146	1.22641	0.261928	1.01481	0.905174	1.04824	1.01783	0.258942	0.130974	0.248213	0.158026	0.070363	0
chr1	53770208	53773134	RP4-784A16.4	ENSG00000232762.1	+	0	0	0	0	0	0	0	0	0	0	0	0	0	0	0	0	0	0
chr1	53793905	53802181	RP4-784A16.5	ENSG00000225675.2	+	1.16128	1.52059	0.790593	1.02912	1.58335	1.4856	1.47368	0.851788	1.45117	0.853477	1.00626	1.15407	0.250267	0.946735	0.688877	1.02336	0.49485	0.573254
chr1	53814160	53814905	RP11-117D22.1	ENSG00000226938.1	-	0	0	0	0	0	0	0	0	0	0	0	0	0	0	0	0	0	0
chr1	53832340	53833917	RP11-117D22.2	ENSG00000230138.1	-	0	0	0	0	0	0	0.061305	0	0	0	0	0.064075	0	0	0	0.062945	0	0.365129
chr1	53878821	53905693	SLC25A3P1	ENSG00000236253.3	-	0.352743	0.119071	0.088379	0.428724	0.288003	0.372923	3.141	2.82544	1.29142	2.89553	2.7906	3.47192	0.764982	0.274112	0	0.370452	1.19012	0.990262
chr1	53925072	53933161	DMRTB1	ENSG00000143006.7	+	0.131217	0.11869	0.15945	0.236283	0.050062	0.248217	0	0.022226	0	0.217312	0.057865	0	0	0	0	0	0.02744	0
chr1	53971910	54199877	GLIS1	ENSG00000174332.3	-	0.165562	0.381803	0.168853	0.270692	0.306031	0.149634	0.585914	0.44546	0.511691	0.592105	0.269267	0.471814	1.79354	1.71107	1.85056	1.15673	0.844078	1.25893
chr1	54154422	54154485	RNU7-95P	ENSG00000239007.1	-	0	0	0	0	0	0	0	0	0	0	0	0	0	0	0	0	0	0
chr1	54231133	54304533	NDC1	ENSG00000058804.10	-	88.8829	91.2227	89.4343	86.383	92.5932	90.1774	49.618	45.9656	49.2813	52.8116	50.487	53.7748	61.4369	66.5443	62.9989	49.7545	53.1237	49.4385
chr1	54236691	54236826	SNORA58	ENSG00000201003.1	-	0	0.460537	0.135521	0	0.504509	0.186333	0.369677	0.426646	1.07092	0.593305	0.14792	0.145625	0	0.792757	0.862409	0	0.095369	0
chr1	54294465	54294534	AL049745.1	ENSG00000264454.1	+	0	0	0	0	0	0	0	0	0	0	0	0	0	0	0	0	0	0
chr1	54307220	54307505	RP4-654H19.2	ENSG00000229687.2	+	0	0	0	0	0	0.011768	0	0	0	0	0	0	0	0	0	0	0	0
chr1	54317392	54356407	YIPF1	ENSG00000058799.9	-	24.2522	25.2018	25.5562	22.2223	23.2208	22.1146	35.3079	39.3113	32.2453	37.2739	39.0725	35.3512	42.1924	44.2385	42.666	38.2865	40.6986	35.0268
chr1	54356912	54376759	DIO1	ENSG00000211452.6	+	0	0	0.077579	0.042866	0.109867	0.123546	0	0	0	0	0	0	0	0.133215	0	0	0	0
chr1	54382247	54411602	HSPB11	ENSG00000081870.7	-	35.0384	35.841	33.7557	37.8982	36.3129	36.7342	54.2086	56.8835	58.6941	56.8673	58.2963	75.7438	55.3685	54.2322	54.1841	65.526	64.402	70.7196
chr1	54411750	54433841	LRRC42	ENSG00000116212.10	+	58.5246	51.1685	54.6809	53.1926	51.1682	51.0054	54.1491	51.8683	55.2582	54.5004	53.929	50.5477	55.4153	56.6064	55.6246	58.2484	58.5054	66.1411
chr1	54440642	54441704	HNRNPA3P12	ENSG00000219102.3	-	0.577043	1.14772	1.21523	0.963249	1.19839	0.841032	0.711174	0.891681	1.19435	0.921717	1.1901	1.20339	0.617901	0.668122	0.309011	0.589013	0.991186	0.812207
chr1	54474412	54483856	LDLRAD1	ENSG00000203985.6	-	0	0	0	0	0	0	0	0	0	0	0	0	0	0	0	0	0	0
chr1	54481327	54481616	AL353898.1	ENSG00000197015.2	+	0	0	0	0	0	0	0	0	0	0	0	0	0.098281	0	0	0	0	0
chr1	54492356	54494172	RP4-758J24.5	ENSG00000272091.1	-	1.37919	1.15827	2.13523	1.67171	1.17517	1.36344	3.73312	3.50874	3.56085	3.89192	3.78808	3.68284	1.7272	1.98055	1.68273	3.54426	3.61268	3.7712
chr1	54497347	54519177	TMEM59	ENSG00000116209.7	-	108.872	121.217	124.404	97.7877	102.368	103.87	96.731	102.026	100.585	98.3608	102.424	103.469	83.4365	88.8768	91.2393	111.783	111.16	118.76
chr1	54498816	54500553	AL353898.2	ENSG00000203276.2	-	0.245523	0.527326	0.332658	0.185041	0.279678	0.154161	0.232475	0.119672	0.264245	0.268408	0.265664	0.407268	0.233355	0.260995	0.206026	0.301533	0.181237	0.280255
chr1	54519260	54578192	TCEANC2	ENSG00000116205.6	+	6.29955	6.76258	5.84262	7.30438	6.78197	6.67311	6.55483	6.82219	6.73114	6.83991	6.42591	7.17434	7.87762	7.16164	7.65992	7.41814	7.39262	9.43661
chr1	54519752	54519827	MIR4781	ENSG00000264208.1	+	0	0	0	0	0	0	0	0	0	0	0	0	0	0	0	0	0	0
chr1	54555529	54555766	RP4-758J24.4	ENSG00000225183.1	+	0.087111	0	0.092191	0	0	0	0.594124	0	0	0.005424	0	0	0	0.044344	0	0.207943	0.011122	0.317481
chr1	54565641	54565897	AL353898.3	ENSG00000237611.1	-	0	0	0.063178	0	0	0.03595	0	0	0	0.371736	0	0	0	0	0	0	0	0
chr1	54569968	54571750	AL161915.1	ENSG00000212670.1	+	1.60213	2.04519	1.58304	2.01145	1.7898	1.88822	1.49711	1.43344	1.39163	1.40616	1.02605	1.42401	2.03113	2.19914	2.24619	2.20254	2.13377	2.50575
chr1	54598747	54619443	CDCP2	ENSG00000157211.10	-	0.000599	0.178927	0.082756	0	0.143877	0.03868	0.040839	0	0.005346	0	0	0	0.034656	0.125437	0	0.039204	0.106518	0.105869
chr1	54606897	54665746	RP11-446E24.4	ENSG00000256407.1	-	0.17659	0	0.114575	0	0.065677	0	0.084764	0.025411	0.028199	0	0	0	0.277256	0.018506	0	0.074279	0.30626	0
chr1	54635333	54637997	AL357673.1	ENSG00000248835.2	-	5.83914	4.61327	4.75683	6.56835	5.44783	5.63494	4.01507	2.93129	3.79595	3.97394	3.14996	3.78002	5.9806	4.75221	5.05009	5.82023	6.34511	6.87558
chr1	54638009	54665709	CYB5RL	ENSG00000215883.5	-	5.98991	4.29964	5.11343	5.78543	4.93158	5.52416	4.40809	4.46516	4.47649	4.58469	5.32515	4.18268	6.63457	7.33186	6.16608	7.77651	5.78313	7.40355
chr1	54649714	54691137	MRPL37	ENSG00000116221.11	+	153.813	167.664	155.718	157.351	153.293	146.25	103.28	106.885	109.988	107.978	109.673	99.8422	116.698	121.685	112.27	115.816	121.299	117.687
chr1	54691105	54879152	SSBP3	ENSG00000157216.11	-	119.01	109.727	104.795	131.735	121.074	126.066	283.824	265.231	245.286	246.512	222.691	248.206	489.57	465.653	492.681	483.138	412.424	457.864
chr1	54703710	54704736	SSBP3-AS1	ENSG00000198711.4	+	0.240213	0.06207	0.049551	0.401532	0.136629	0.169824	0.11274	0	0	0.026423	0	0	0	0	0	0.209467	0	0.074945
chr1	54751078	54753044	RP5-997D24.3	ENSG00000225632.1	+	0	0	0	0	0	0	0	0	0	0	0	0	0	0	0	0	0	0
chr1	54881929	54886533	RP4-705F19.1	ENSG00000232245.1	+	0	0	0	0	0	0	0	0	0	0	0	0	0	0	0	0	0	0
chr1	54970341	54970443	AC099796.1	ENSG00000265404.1	+	0	0	0	0	0	0	0	0	0	0	0	0	0	0	0	0	0	0
chr1	54982085	54982932	RP5-866L20.1	ENSG00000235741.1	-	0	0	0	0	0	0	0	0	0	0	0	0	0	0	0	0	0	0
chr1	54990497	54990604	RP5-866L20.2	ENSG00000237173.1	+	0	0	0	0	0	0	0	0	0	0	0	0	0	0	0	0	0	0
chr1	54991059	54991126	SNORD112	ENSG00000252646.1	+	0	0	0	0	0	0	0	0	0	0	0	0	0	0	0	0	0	0
chr1	55002469	55003431	HNRNPA1P63	ENSG00000227453.1	+	0.039788	0.027627	0.045113	0.004055	0.002632	0.132563	0.003496	0.003291	0	0.005618	0	0.025561	0.069143	0.032246	0.008761	0.05775	0.03638	0
chr1	55007930	55104865	ACOT11	ENSG00000162390.13	+	2.77375	2.83949	3.07723	3.07165	3.57279	3.18016	5.26395	4.56679	6.41915	4.5007	5.07228	4.90992	3.83986	3.65732	3.99938	3.74961	3.46729	4.24915
chr1	55074855	55089229	FAM151A	ENSG00000162391.7	-	0	0	0	0	0	0	0	0	0	0	0	0	0	0	0	0	0	0
chr1	55087150	55094111	RP11-240D10.4	ENSG00000230728.1	-	0	0	0	0	0	0	0	0	0	0	0	0	0	0	0	0	0	0
chr1	55107459	55207981	MROH7-TTC4	ENSG00000271723.1	+	0.469678	0.489364	0.093869	0.151821	0.55486	0.535139	1.26424	1.6629	0.131906	0.399606	0	0.590311	1.51323	2.50101	1.11826	0.657842	0.812943	3.73908
chr1	55107463	55175939	MROH7	ENSG00000184313.15	+	0	0.013683	0.053053	0.080528	0.037749	0.06367	0.018924	0	0.106456	0.047734	0.12076	0.064798	0.071538	0.042133	0.105023	0.256183	0.062716	0
chr1	55181495	55208330	TTC4	ENSG00000243725.2	+	19.7563	19.9582	21.2784	21.1432	19.8567	19.0019	22.2608	20.5617	24.8896	22.7319	23.6291	22.2401	27.1588	25.9643	27.5089	27.7403	26.6148	17.4949
chr1	55222571	55230187	PARS2	ENSG00000162396.5	-	13.6841	14.3822	13.5429	13.713	13.0509	13.0435	8.58475	10.3767	10.0559	9.17235	8.59877	7.90413	13.0357	13.5374	11.8932	11.9026	12.8001	11.302
chr1	55245385	55266940	TTC22	ENSG00000006555.6	-	0.66089	0.673141	0.414876	0.683486	0.676715	0.593777	0.807587	0.552545	0.529909	0.592541	0.818273	0.550937	0.278647	0.314769	0.181762	0.552478	0.131266	0.130774
chr1	55258558	55260578	RP11-67L3.2	ENSG00000237453.1	+	0	0	0	0	0	0	0	0	0	0	0	0	0	0	0	0	0	0
chr1	55271736	55307925	C1orf177	ENSG00000162398.7	+	0.117409	0.182627	0.098286	0	0.173986	0.229806	0	0.084993	0.073012	0	0.114163	0	0	0	0	0	0	0
chr1	55315306	55352891	DHCR24	ENSG00000116133.7	-	370.051	376.072	351.956	416.532	418.09	417.636	470.159	476.052	442.392	439.203	429.287	395.84	300.82	305.636	286.82	263.616	246.362	218.908
chr1	55352548	55353674	RP11-67L3.5	ENSG00000242396.1	+	0.139691	0.192019	0.344524	0.331887	0.554327	0.303878	0.289701	0.233389	0.257921	0.101684	0.40002	0.317353	0.807482	0.288786	0.879546	0.442616	0.511472	0.298987
chr1	55353236	55354523	RP11-67L3.4	ENSG00000233203.2	+	0.129325	0.167662	0	0.539721	0.24239	0.497085	0	0.193608	0.370456	0.335642	0.721951	0.492728	0.37766	0.6666	0.537169	0.331667	0.196953	0
chr1	55446465	55457966	TMEM61	ENSG00000143001.4	+	0.438507	0.195284	0.612843	0.477504	0.206729	0.263731	0.821131	0.856404	0.507922	0.819105	0.692656	0.72432	0.276839	0.331441	0.251138	0.519913	0.321402	0.325611
chr1	55446623	55457947	RP11-12C17.2	ENSG00000233271.1	-	0	0	0	0	0	0	0	0	0	0	0	0	0	0	0	0	0	0
chr1	55464606	55476556	BSND	ENSG00000162399.6	+	0.196372	0.232358	0.177896	0.223735	0.117301	0.312479	0.22769	0.151206	0.168678	0.19503	0.114206	0.116994	0.25591	0.142032	0.082295	0.190004	0.266833	0.123023
chr1	55505221	55530525	PCSK9	ENSG00000169174.9	+	49.0799	42.628	37.909	54.4033	55.4623	55.6662	30.429	27.257	26.5241	26.3307	23.2616	25.0699	21.8273	20.7596	19.8743	3.43045	3.79952	4.01707
chr1	55532032	55680786	USP24	ENSG00000162402.8	-	30.2368	31.3711	31.4759	32.2087	30.403	32.7365	28.7888	28.4335	28.3285	28.7812	25.8535	29.475	46.2113	46.649	44.8142	36.6331	37.6041	40.1739
chr1	55683534	55699850	RP11-101C11.1	ENSG00000231090.1	+	0	0	0	0.174	0	0	0	0	0	0	0	0	0	0	0	0	0	0
chr1	55688052	55689045	GYG1P3	ENSG00000231095.1	+	0.050692	0.023141	0.185863	0.032551	0.17742	0.025494	0.054268	0	0	0	0	0	0.012934	0	0	0.035794	0.034885	0
chr1	55691314	55691396	MIR4422	ENSG00000265822.1	+	0	0	0	0	0.468112	0.263972	0	0	0	0	0	0	0.014612	0	0	0	0	0
chr1	55833139	55834447	GOT2P1	ENSG00000231900.3	+	0	0	0	0	0	0	0	0	0	0	0	0	0	0	0	0	0	0
chr1	55838383	55838989	RP4-633H17.2	ENSG00000232198.2	-	0	0	0	0	0	0	0	0	0	0	0	0	0	0	0	0	0	0
chr1	55842199	55842525	RN7SKP291	ENSG00000199831.1	-	0	0	0	0	0	0	0	0	0	0	0	0	0	0	0	0	0	0
chr1	55864187	55864293	RNU6-830P	ENSG00000252162.1	+	0	0	0	0	0	0	0	0	0	0	0	0	0	0	0	0	0	0
chr1	55950544	55950645	Y_RNA	ENSG00000272051.1	-	0	0	0	0	0	0	0	0	0	0	0	0	0	0	0	0	0	0
chr1	56046710	56200675	RP11-466L17.1	ENSG00000234810.1	+	0	0	0	0	0	0	0	0	0	0	0	0	0.01194	0	0	0	0	0
chr1	56289480	56333921	RP11-90C4.1	ENSG00000233147.1	+	0	0	0	0	0	0	0	0	0	0	0	0	0	0	0	0	0	0
chr1	56381282	56410636	RP11-90C4.2	ENSG00000230250.1	-	0	0	0	0	0	0	0	0	0	0	0	0	0	0	0	0	0	0
chr1	56404387	56404953	PIGQP1	ENSG00000227104.3	-	0	0	0	0	0	0	0	0	0	0	0	0	0	0	0	0	0	0
chr1	56410760	56415792	RP11-90C4.3	ENSG00000233079.1	+	0	0	0	0	0	0	0	0	0	0	0	0	0	0	0	0	0	0
chr1	56611393	56620896	RP1-158P9.1	ENSG00000235612.1	+	0	0	0	0	0	0	0	0	0	0	0	0	0	0	0	0	0	0
chr1	56673239	56674128	RP4-710M16.1	ENSG00000229871.1	-	0	0	0	0	0	0	0	0	0	0	0.027233	0	0.107383	0	0	0	0	0
chr1	56713966	56724243	RP11-504A18.1	ENSG00000260971.3	-	0.183762	0.070977	0.36802	0.372244	0.180508	0.199103	0.096136	0.188059	0	0.085527	0	0.0689	0.263034	0.440529	0.71048	0.270684	0.162816	0.309229
chr1	56843005	56843090	AC119674.1	ENSG00000223307.2	-	0	0	0	0	0.461395	0	0	0	0	0	0	0	0	0	0	0	0	0
chr1	56880635	56881638	RP4-710M16.2	ENSG00000223956.1	+	0	0	0	0	0	0	0	0.224674	0	0	0.309528	0	1.16654	1.47059	2.04547	0	0	0.279578
chr1	56960419	57110974	PPAP2B	ENSG00000162407.8	-	33.3881	32.9581	30.4226	29.5388	28.2935	28.6981	6.13435	6.13158	7.12374	6.03746	5.7857	6.28018	50.0184	56.9008	54.2356	26.4482	26.192	26.0449
chr1	57004124	57004583	RPL21P23	ENSG00000236776.1	+	0	0	0	0	0	0	0	0	0	0	0	0	0	0	0	0	0	0
chr1	57051285	57051915	RP11-377K22.3	ENSG00000224980.1	-	0	0	0	0	0	0	0	0	0	0	0	0	0	0	0	0	0	0
chr1	57085082	57085222	RP11-377K22.2	ENSG00000225475.1	-	0.987354	0.784754	1.52623	0.747201	0.945727	2.33835	1.54222	1.11276	1.99833	0.846867	0.750338	1.18917	1.02784	0.96126	1.01322	0.944621	1.40129	0.671287
chr1	57110995	57181008	PRKAA2	ENSG00000162409.6	+	9.1329	8.74205	9.06921	9.51445	9.10901	10.5077	5.33471	5.56854	5.95706	6.63546	6.20112	7.35435	9.25501	9.8955	9.86277	8.90748	8.95522	9.12944
chr1	57184477	57285369	C1orf168	ENSG00000187889.8	-	0.150364	0.053129	0.091965	0.272729	0.078422	0.026776	0.217184	0.240354	0.28594	0.224655	0.189106	0.161108	5.66489	4.24726	5.2809	2.7658	2.25946	2.57322
chr1	57289352	57292593	RP11-378I13.1	ENSG00000229913.1	-	0	0	0	0	0	0	0	0	0	0	0	0	0	0	0	0	0	0
chr1	57320479	57383894	C8A	ENSG00000157131.10	+	0	0	0	0	0	0	0	0	0	0	0	0	0	0	0	0	0	0
chr1	57394883	57431813	C8B	ENSG00000021852.8	-	0	0	0	0	0	0	0	0	0	0	0	0	0	0	0	0	0	0.020355
chr1	57429559	57462430	RP5-1103B4.3	ENSG00000236341.1	+	0.000277	0	0	0	0	4.2e-05	0	0.000518	0	0	0.000406	0.000286	0	0	0	0	0	0
chr1	57431953	57432035	AL161740.1	ENSG00000221591.1	+	0	0	0	0	0	0	0	0	0	0	0	0	0	0	0	0	0	0
chr1	57460451	59012406	DAB1	ENSG00000173406.11	-	12.0674	10.1837	9.99619	13.527	10.1179	10.1373	58.2642	52.1732	61.6647	50.2234	54.2002	59.4212	10.9723	9.72513	9.65527	13.2096	13.1343	13.1115
chr1	57852248	57853122	RP6-102O10.1	ENSG00000227935.1	+	0	0	0	0	0	0	0	0	0	0	0	0	0	0	0	0	0	0
chr1	58071519	58071878	RP11-243M12.1	ENSG00000236888.1	-	0	0.076983	0	0	0	0.030064	0.036369	0	0.155008	0	0	0.004157	0.055925	0	0	0	0	0
chr1	58222756	58222848	AL137855.1	ENSG00000238773.1	+	0	0	0	0	0	0	0	0	0	0	0	0	0	0	0	0	0	0
chr1	58326204	58346577	RP4-737A23.2	ENSG00000226759.3	+	0	0	0	0	0	0.060323	0	0	0	0	0	0	0	0	0	0	0	0
chr1	58513847	58514963	HNRNPA1P6	ENSG00000229887.3	-	0	0.006044	0.095969	0.099347	0.064668	0.009091	0.001768	0.004519	0	0.006145	0.004228	0.007095	0.085138	0.036746	0	0	0.035183	0.00843
chr1	58521805	58522152	RP11-393I23.2	ENSG00000223416.3	-	4.63202	4.90681	4.83331	5.21301	5.81591	4.8357	4.50005	4.85381	5.02976	5.05199	4.94421	3.86715	5.0721	4.48837	3.54401	4.1013	3.07188	3.65025
chr1	58525811	58545946	RP11-393I23.4	ENSG00000235038.1	+	0.074077	0	0	0.028793	0	0	0	0	0	0	0	0	0	0	0	0	0	0
chr1	58550091	58550231	RP11-393I23.3	ENSG00000230546.1	+	0	0	0	0	0	0	0	0	0	0	0	0	0	0	0	0	0	0
chr1	58694354	58694675	RP11-414C16.1	ENSG00000233216.1	-	0	0	0	0	0	0	0	0	0	0	0	0	0	0	0	0	0	0
chr1	58881056	59012474	OMA1	ENSG00000162600.7	-	12.3592	11.3434	12.1424	11.9206	13.836	15.0786	13.1953	15.0089	16.5154	15.5692	18.9253	15.8475	20.1578	23.2908	22.0244	22.9206	22.8028	25.2711
chr1	59018585	59019005	RP4-592A1.4	ENSG00000270209.1	-	0	0	0	0	0	0	0	0	0	0	0	0	0	0	0	0	0	0
chr1	59031301	59031604	RN7SL713P	ENSG00000264128.1	-	0	0	0	0	0	0	0	0	0	0	0	0	0	0	0	0	0	0
chr1	59041099	59043166	TACSTD2	ENSG00000184292.5	-	0.418271	0.574108	0.353314	0.426076	0.600146	0.827146	0.392276	0.176084	0.430529	0.29789	0.447361	0.223525	0.6626	0.977455	0.685179	0.929321	1.27472	1.57083
chr1	59096513	59097202	RP4-592A1.2	ENSG00000185839.2	-	3.51882	5.02708	4.75333	8.27344	4.29401	5.3525	4.17625	3.23419	4.10861	2.41223	3.01575	1.59934	2.1432	5.28075	2.1577	3.46996	3.51178	3.87635
chr1	59120411	59165764	MYSM1	ENSG00000162601.5	-	43.5772	35.0981	35.7994	47.4378	44.1561	47.1882	85.5481	90.8376	92.2181	97.0865	83.4944	104.073	108.845	105.825	101.898	205.322	198.239	225.31
chr1	59187951	59188044	Y_RNA	ENSG00000222168.1	+	0	0	0	0	0	0	0	0	0	0	0	0	0	0	0	0	0	0
chr1	59230521	59230607	AL136985.1	ENSG00000264081.1	-	0	0	0	0	0	0	0	0	0	0	0	0	0	0	0	0	0	0
chr1	59246465	59249785	JUN	ENSG00000177606.5	-	8.75548	7.11311	5.77629	8.62535	10.4003	10.1257	6.8907	6.43496	5.71454	5.51834	4.83493	4.67891	5.72291	4.12076	4.57217	7.66291	7.98351	7.94197
chr1	59250823	59365384	RP4-794H19.2	ENSG00000234807.4	+	0	0	0	0	0	0	0	0.05773	0	0	0.047509	0	0	0	0	0	0	0
chr1	59278480	59279014	RP11-63G10.3	ENSG00000272226.1	-	0.062297	0	0	0	0.210143	0	0.029367	0.063399	0	0.241314	0.087436	0.072927	0	0.07736	0.049856	0.187011	0.064319	0
chr1	59304120	59316926	RP11-63G10.2	ENSG00000231740.1	-	0	0	0.263854	0	0.021626	0	0	0	0	0	0	0.015543	0	0	0	0.023027	0	0.313024
chr1	59348540	59362375	RP4-794H19.1	ENSG00000232453.1	-	0	0.04577	0.072112	0.129213	0.187951	0.116401	0.160875	0.125951	0.140774	0.093638	0.417701	0.080627	0.07251	0.087834	0.397967	0.132101	0.217048	0.216578
chr1	59465348	59466166	PHBP3	ENSG00000228121.1	+	0.091003	0	0.039114	0.079352	0	0.078644	0.062027	0.117732	0	0.050443	0	0.046913	0.104845	0	0	0.113779	0	0
chr1	59486059	59510286	RP4-794H19.4	ENSG00000230812.1	+	0	0	0	0	0	0	0	0	0	0	0	0	0	0	0	0	0	0
chr1	59520069	59521721	RP11-145M4.1	ENSG00000241042.1	-	1.10746	1.02639	0.636749	3.12584	1.60482	1.6474	0	0	0	0.255945	0	0	0	0	0.034938	0	0.104617	0
chr1	59521671	59543788	RP11-145M4.2	ENSG00000235215.2	-	1.47393	1.81817	1.6894	1.2333	2.494	1.62615	0	0	0	0.065568	0	0	0	0	0.432982	0	0.129774	0
chr1	59522315	59553867	RP11-145M4.3	ENSG00000237352.2	+	0	0	0	0	0	0	0	0	0	0	0	0	0	0	0	0	0	0
chr1	59597608	59664293	RP11-470E16.1	ENSG00000224609.2	-	0	0	0	0	0	0	0	0	0	0	0	0	0	0	0	0	0	0
chr1	59754975	59755312	RP11-467C18.1	ENSG00000270457.1	-	0	0	0	0.263246	0.275555	0	0	0	0	0	0	0.094338	0	0.12	0	0	0	0.144108
chr1	59762310	60233347	FGGY	ENSG00000172456.12	+	12.2241	9.95275	11.515	7.77742	10.4267	7.47198	5.6071	6.97508	5.59526	10.0724	7.01213	4.98522	13.3156	19.274	13.4586	9.18625	10.4853	9.6382
chr1	60198899	60198968	MIR4711	ENSG00000266150.1	-	0	0	0	0	0	0	0	0	0	0	0	0	0	0	0	0	0	0
chr1	60220419	60254854	RP4-782L23.2	ENSG00000226883.1	-	0	0	0	0	0	0	0	0	0	0	0	0	0	0	0	0	0	0
chr1	60238467	60254520	RP4-782L23.1	ENSG00000231816.1	+	0.297937	0	0	0.481363	0.263465	0	0	0.154045	0.197911	0.512951	0	0.619496	0.559188	0.304544	0.245146	0.138893	0.197919	0.178093
chr1	60280458	60342050	HOOK1	ENSG00000134709.6	+	39.53	37.6864	39.7187	37.7852	37.8084	43.6527	17.9094	17.2073	21.0683	21.5171	21.2975	23.404	20.7663	20.8235	20.625	22.6402	23.1193	24.5517
chr1	60358980	60392462	CYP2J2	ENSG00000134716.5	-	1.13718	1.01373	1.43575	1.02503	1.06005	0.811408	0.131492	0.777411	0.343819	0.371479	0.775444	0.497989	0.657082	0.794998	0.582149	0.718588	0.885098	0.507471
chr1	60440431	60440726	RN7SL475P	ENSG00000265535.1	-	0	0	0	0	0	0	0	0	0	0	0	0	0	0	0	0	0	0
chr1	60452941	60539442	C1orf87	ENSG00000162598.9	-	0.215978	0	0.014497	0.161606	0.061144	0.238161	0	0.054566	0	0	0	0	0.113931	0	0	0.24427	0.256251	0.122553
chr1	60563087	60563648	PGBD4P8	ENSG00000229332.2	+	0	0	0	0	0	0	0	0	0	0	0	0	0	0	0	0	0	0
chr1	60580547	60615351	RP11-575B7.3	ENSG00000238242.1	+	0	0	0	0	0	0	0	0	0	0	0	0	0	0	0	0	0	0
chr1	61005921	61106163	RP11-776H12.1	ENSG00000226476.2	-	0.376721	0.179107	0.444445	0.248985	0.211647	0.27792	0.15656	0.172747	0.085815	0.117639	0.121996	0.292229	0.256597	0.213039	0.228821	0.258143	0.419277	0.205261
chr1	61125303	61291256	RP11-436K8.1	ENSG00000231252.1	-	0	0.054505	0	0.045575	0.06642	0	0	0	0	0.032588	0	0.032276	0	0	0	0	0	0
chr1	61330931	61928465	NFIA	ENSG00000162599.11	+	1.07777	1.22621	1.04422	0.700793	1.19959	1.90069	0.352726	0.214065	0.714656	0.252323	0.538887	0.261618	0.667428	0.665182	0.651501	3.05742	4.37948	4.38166
chr1	61405911	61436448	RP4-668G5.1	ENSG00000237928.1	-	0	0	0	0	0	0	0	0	0	0	0	0.105938	0	0	0	0	0	0
chr1	61549127	61549202	AC096534.1	ENSG00000263380.1	-	0	0	0	0	0	0	0	0	0	0	0	0	0	0	0	0	0	0
chr1	61590405	61590874	RP4-802A10.1	ENSG00000270742.1	+	0	0	0	0	0	0.091548	0	0	0	0	0.041255	0.130629	0	0	0	0.302805	0.079409	0.132865
chr1	61714617	61719182	RP5-833A20.1	ENSG00000237853.2	-	0	0	0	0	0	0	0	0	0	0	0	0	0	0	0	0	0	0
chr1	62094703	62094793	AC099791.1	ENSG00000264551.1	+	0	0	0	0	0	0	0	0	0	0	0	0	0	0	0	0	0	0
chr1	62119866	62120580	RP11-430G17.1	ENSG00000223920.2	+	0	0	0	0	0	0	0	0	0	0	0	0	0	0	0	0	0	0
chr1	62146718	62191095	TM2D1	ENSG00000162604.8	-	29.513	26.0506	25.5035	24.9359	26.2425	25.2496	26.09	22.5549	22.5756	24.4549	23.0461	23.6387	31.885	35.2004	34.4642	32.6727	35.2343	36.7387
chr1	62207670	62208096	RP11-430G17.3	ENSG00000271200.1	-	0.349708	0	0.320645	0.421981	0	0.377721	0.345256	0.097919	0.257451	0.517521	0.067547	0.580701	0.676572	0.660071	0.723063	0.514984	0.142578	0.151364
chr1	62208149	62629592	INADL	ENSG00000132849.14	+	24.9974	27.1101	26.5413	27.6054	26.0669	27.6536	25.6437	24.0899	24.805	23.8481	22.9487	25.5271	27.3368	28.8635	27.7285	32.5003	30.9466	35.9995
chr1	62282091	62282194	RNU6-414P	ENSG00000200575.1	+	0	0	0	0	0	0.043149	0	0	0.397058	0	0	0.039991	0	0	1.9288	0	0.185798	0
chr1	62318171	62318274	RNU6-1177P	ENSG00000212360.1	+	0	0	0	0	0	0	0	0	0	0.41793	0	0.354206	0	0.370102	0	0	0.346144	0.045034
chr1	62504514	62504783	LAMTOR5P1	ENSG00000236646.1	+	0	0	0	0	0	0	0	0.150116	0	0.051004	0	0	0.528255	0	0	0.154565	0.129408	0
chr1	62538120	62538411	RN7SL180P	ENSG00000242860.2	+	0	0	0	0.401194	0	0	0	0	0	0.243911	0	0	0	0.005669	0.066319	0	0.16045	0
chr1	62544458	62544531	MIR3116-1	ENSG00000263908.1	+	0	0	0	0	0	0	0.095542	0	0	0	0	0.144523	0	0	0	0	0	0
chr1	62654803	62655625	PIGPP2	ENSG00000234204.1	+	0	0	0	0	0	0	0	0	0	0	0	0	0	0	0	0	0	0
chr1	62656194	62656598	RPS15AP7	ENSG00000234088.1	+	0	0	0	0	0	0.013687	0	0	0	0	0	0	0	0	0	0.042935	0	0
chr1	62660503	62678000	L1TD1	ENSG00000240563.1	+	387.882	356.857	404.292	462.402	434.089	441.137	330.015	349.334	379.77	389.049	405.724	431.064	249.668	237.642	213.521	318.376	305.321	271.355
chr1	62673808	62674114	RP5-1155K23.4	ENSG00000237227.1	-	0	0	0	0	0	0.05503	0	0	0	0	0	0.129023	0	0	0	0.088882	0	0
chr1	62677229	62677338	Y_RNA	ENSG00000200174.1	+	0.000352	0.000424	0.000235	0.000354	0.000386	0.000361	0.0005	0.000407	0.000515	0.000434	0.000444	0.000326	0.000388	0.000333	0.000746	0.0004	0.000426	0.000457
chr1	62702651	62785085	KANK4	ENSG00000132854.14	-	0.089447	0	0.095386	0.158327	0.114062	0.124262	0.662289	0.423262	0.511533	0.545625	0.56401	0.616185	0.159735	0.261138	0.246956	0.143656	0.176579	0.243094
chr1	62763821	62763928	RNU6-371P	ENSG00000201153.1	-	0	0	0	0	0	0	0	0	0	0	0	0	0	0	0	0	0	0
chr1	62901968	62917475	USP1	ENSG00000162607.8	+	53.0506	53.2646	56.5832	58.6594	59.946	59.1008	60.4999	56.0903	61.252	61.0374	60.2906	67.7157	66.82	75.1519	66.9338	61.2212	63.8881	65.3875
chr1	62920399	63153969	DOCK7	ENSG00000116641.11	-	25.6455	25.1936	24.8937	24.0817	23.8549	26.3777	27.4914	30.4179	30.1157	31.5674	29.3754	32.6054	40.5108	44.0605	43.0984	44.2676	45.0942	47.7104
chr1	62996307	62996544	RP11-293K19.1	ENSG00000270549.1	+	0	0	0	0	0	0	0	0	0	0	0	0	0	0	0	0	0	0
chr1	63063158	63071830	ANGPTL3	ENSG00000132855.4	+	0	0	0	0	0	0	0	0	0	0	0	0	0	0	0	0	0	0
chr1	63073437	63075249	AL138847.1	ENSG00000269624.1	+	0	0	0	0	0	0	0	0	0	0	0	0	0	0	0	0	0	0
chr1	63106793	63107338	RP5-849H19.2	ENSG00000213703.2	-	0.046623	0	0	0.061813	0.06258	0	0.08105	0.059387	0	0	0	0.165767	0.253228	0.129242	0.052197	0.076923	0	0.346545
chr1	63154153	63176365	RP11-230B22.1	ENSG00000235545.1	+	1.1692	0.900922	1.05902	0.713894	0.720528	1.42068	1.30074	1.35151	1.2776	1.19554	1.28904	1.20766	3.22803	3.01359	1.92421	4.61182	4.67921	3.863
chr1	63249806	63331184	ATG4C	ENSG00000125703.10	+	21.4619	23.1042	23.0645	24.7195	23.7167	25.1977	21.0809	24.9874	20.6695	22.8386	25.4388	24.2989	37.9096	47.8838	41.8547	27.3163	28.4748	28.4367
chr1	63361680	63367310	RP4-771M4.3	ENSG00000234318.1	+	0	0	0	0	0	0	0	0.328814	0	0	0	0.08817	0.111244	0	0.426687	0	0	0
chr1	63370851	63371153	RP4-771M4.2	ENSG00000237163.1	+	0	0	0	0	0	0	0	0	0	0.110071	0	0	0	0	0	0.579176	0	0
chr1	63466168	63478142	RP11-5P4.1	ENSG00000229537.1	-	0	0	0	0	0	0	0	0	0	0	0	0	0	0	0	0	0	0
chr1	63489878	63491329	RP11-5P4.2	ENSG00000227485.1	+	0	0	0	0	0	0	0	0	0	0	0	0	0	0	0	0	0	0
chr1	63543752	63544702	RP11-5P4.3	ENSG00000229225.1	-	0	0	0	0	0	0	0	0	0	0	0	0	0	0	0	0	0	0
chr1	63604921	63628824	RP11-335E6.2	ENSG00000203605.3	+	0	0	0	0	0	0	0	0	0	0	0	0	0	0	0	0	0	0
chr1	63624754	63628307	RP11-335E6.4	ENSG00000271593.1	-	0	0	0	0.170954	0	0	0	0	0	0	0	0	0	0	0	0.117732	0	0
chr1	63652007	63652121	RNA5SP49	ENSG00000252259.1	-	0	0	0	0	0	0	0	0	0	0	0	0	0	0	0	0	0	0
chr1	63655660	63782902	LINC00466	ENSG00000224209.2	-	0	0	0.082877	0.166321	0	0	0	0	0	0	0.230702	0.145004	0	0	0	0	0	0
chr1	63715591	63717442	RP11-335E6.3	ENSG00000228734.2	+	0	0	0	0	0	0	0	0	0	0	0	0	0	0	0	0	0	0
chr1	63727784	63728378	AL138935.1	ENSG00000223683.1	+	0	0	0	0	0	0	0	0	0	0	0	0	0	0	0	0	0	0
chr1	63786555	63790112	RP4-792G4.2	ENSG00000230798.1	-	137.539	141.497	140.909	130.865	138.526	132.604	53.3431	58.826	64.7397	71.3501	64.6785	67.6629	50.1043	38.6248	38.1776	45.4108	51.9619	42.6123
chr1	63788730	63790797	FOXD3	ENSG00000187140.4	+	15.8762	13.9955	13.2572	15.5318	13.7843	14.2667	9.55741	8.05492	9.95682	10.3206	9.02983	11.943	8.04248	6.89133	7.3629	7.26956	8.49669	7.64457
chr1	63803934	63804043	Y_RNA	ENSG00000252784.1	+	0	0	0	0	0	0	0	0	0	0	0	0	0	0	0	0	0	0
chr1	63825494	63826850	RP4-792G4.3	ENSG00000236674.1	-	0	0	0	0	0	0	0	0	0	0.030444	0	0	0	0	0	0	0	0
chr1	63833261	63904233	ALG6	ENSG00000088035.11	+	22.4893	23.9848	24.2373	23.7515	25.8156	24.312	18.6768	19.5468	21.0653	19.1851	20.9517	20.7747	26.3283	27.3176	26.774	22.011	22.5396	22.6172
chr1	63906441	64059392	ITGB3BP	ENSG00000142856.12	-	57.8725	62.5139	56.7864	58.3015	52.7566	56.2841	48.7813	48.7342	48.0797	49.8367	50.7835	58.2059	59.7564	69.5863	69.4393	58.0335	54.3542	54.4351
chr1	63989043	64038364	EFCAB7	ENSG00000203965.8	+	3.54059	4.43494	4.61284	4.64635	4.57711	5.31407	7.62702	6.31269	7.38988	7.06034	7.2386	7.73208	10.9273	10.5924	10.6013	7.17269	9.01157	8.56504
chr1	63995288	63995569	RN7SL488P	ENSG00000264271.1	-	0	0	0	0	0	0	0	0	0	0	0	0	0	0	0	0	0	0
chr1	64002382	64002441	RNU7-123P	ENSG00000251720.1	-	0	0	0	0	0	0	0	0.031998	0	0	0	0	0	0	0	0	0	0
chr1	64014588	64015405	DLEU2L	ENSG00000116652.5	+	0.266168	0.786471	0.70756	0.363833	0.50525	0.738596	0.937723	1.04173	0.646138	0.903844	0.520679	0.217771	0.514806	0.632149	1.03819	0.47681	0.269593	0.703746
chr1	64058947	64125916	PGM1	ENSG00000079739.11	+	222.865	243.398	225.73	189.486	201.027	205.146	90.7234	92.2552	85.367	108.976	96.606	95.747	138.725	150.131	144.758	162.836	163.781	165.857
chr1	64121414	64121716	RN7SL130P	ENSG00000244256.2	+	2.65466	2.57198	1.25639	2.73862	1.30684	2.04382	1.16495	0	0.115105	1.35139	0.75752	1.89096	0.821362	1.29695	0.751264	0.896134	0.945226	0.990284
chr1	64239693	64647181	ROR1	ENSG00000185483.7	+	62.8474	67.7396	67.4457	61.2987	59.2858	60.7908	21.9511	23.4947	22.8734	21.1146	21.6763	20.1097	66.5439	80.1405	73.5069	33.3722	38.4382	38.1081
chr1	64254392	64254975	RP4-597J3.1	ENSG00000177452.7	-	0	0	0	0	0	0.006328	0	0	0	0	0	0	0	0	0	0	0	0
chr1	64308862	64309356	CFL1P3	ENSG00000228056.2	-	0	0.040157	0	0	0.079855	0.043636	0	0.011319	0	0	0	0	0	0.011825	0.012677	0	0	0.045242
chr1	64494566	64494672	RNU6-809P	ENSG00000207190.1	-	0	0	0	0	0	0	0	0	0	0	0	0	0	0	0	0	0	0
chr1	64532312	64532413	Y_RNA	ENSG00000200508.1	-	0	0	0	0	0	0	0	0	0	0	0	0	0	0	0	0	0	0
chr1	64560125	64636980	RP11-24J23.2	ENSG00000223949.2	-	0	0	0	0	0	0	0.029667	0.029625	0	0	0.022034	0.051299	0	0	0.033383	0.021753	0	0
chr1	64669310	64733051	UBE2U	ENSG00000177414.9	+	0	0	0	0	0	0	0	0	0	0	0	0	0	0	0	0	0	0
chr1	64850081	64850142	RNU7-62P	ENSG00000238653.1	-	0	0	0	0	0	0	0	0	0	0	0	0	0	0	0	0	0	0
chr1	64936428	65158741	CACHD1	ENSG00000158966.9	+	35.5879	30.2114	30.27	36.6839	33.2369	33.4251	44.1826	41.167	41.9892	45.3903	42.4175	46.9786	44.3557	47.0031	45.4263	95.6501	97.6475	107.999
chr1	65045530	65045606	MIR4794	ENSG00000264470.1	+	0.204498	0	0	0	0.146724	0.041138	0	0.038786	0	0	0	0	0	0	0	0.802556	0.230322	0
chr1	65210778	65298915	RAVER2	ENSG00000162437.10	+	25.2178	26.919	26.6826	24.6062	24.8413	25.6021	25.1988	24.9557	27.382	26.0585	26.0578	28.6528	29.2093	30.5461	29.1689	36.5208	38.3435	39.9741
chr1	65298912	65432187	JAK1	ENSG00000162434.7	-	25.1496	24.7455	24.8988	23.3895	23.4964	25.4914	24.2708	22.875	26.7425	25.5956	25.5286	28.095	22.353	23.2682	21.5289	27.791	29.8432	31.1824
chr1	65384126	65384366	RP11-182I10.1	ENSG00000234784.2	+	0	0	0	0	0	0	0	0	0	0	0	0	0	0	0	0	0	0
chr1	65407662	65408048	RP11-182I10.2	ENSG00000233877.2	+	0	0	0	0	0	0	0	0	0	0	0	0	0	0	0	0	0	0
chr1	65437908	65468159	RP11-182I10.3	ENSG00000226891.2	-	0.398948	0.143576	0.16935	0.349598	0.527695	0.643989	0.717564	0.255242	0.135288	0.355476	0.460046	0.461693	0.447643	0.247272	0.230114	0.297846	0.620978	0.202742
chr1	65450291	65451770	SLC2A3P2	ENSG00000185031.6	-	0.127494	0.009987	0.1316	0.150896	0.12611	0.276517	0.107396	0	0.247279	0.050837	0.05437	0.066106	0.174003	0.189181	0.122452	0.071217	0.225351	0.160125
chr1	65469153	65469770	RP4-535B20.4	ENSG00000272506.1	-	0.453952	0.084307	0.389125	0.425158	0.288932	0.19862	0.223721	0.139454	0	0.068938	0.036082	0.2865	0.11304	0.069984	0.065036	0.195659	0.197881	0
chr1	65488651	65488757	RNU6-1176P	ENSG00000212257.1	-	0.586186	0.023311	0.250175	0	0	0	0	0.287089	0.156457	0.066361	0	0.068485	0.872784	0.373263	0	0.140008	0.160798	0
chr1	65523438	65523525	MIR3671	ENSG00000265996.1	-	2.33805	2.05648	1.6905	4.25678	1.56252	5.40243	1.63064	1.88355	3.12305	1.17122	2.16209	3.70444	2.16104	3.20755	1.42831	3.28619	3.28166	2.94493
chr1	65524117	65524191	MIR101-1	ENSG00000199135.1	-	0	0.033256	0	0	0.047763	0	0	0	0	0	0	0	0	0	0	0	0	0
chr1	65532310	65533420	RP4-535B20.1	ENSG00000231485.1	-	1.03619	0	1.92378	0.341908	0	0.668445	0	0	0	0	0.214228	0.322631	0	0	0	0	0	0.456263
chr1	65543096	65543814	RP4-535B20.2	ENSG00000235804.2	-	0	0	0	0	0	0	0	0	0	0	0	0	0	0	0	0	0	0
chr1	65558075	65558297	MRPS21P1	ENSG00000234496.2	-	0	0.238612	0	0	0	0.227277	0.192575	0.096298	0.577213	0.125436	0.160858	0.085259	0.13488	0.089086	0.157294	0.076776	0.113951	0
chr1	65613232	65697828	AK4	ENSG00000162433.10	+	185.957	209.155	189.904	227.006	244.719	221.416	33.1274	40.9534	48.475	30.2987	35.3659	40.09	55.307	65.8641	51.7837	50.0081	38.6011	45.6092
chr1	65620163	65620333	RP4-700A9.1	ENSG00000231622.1	+	0.012789	0	0	0.345802	0	0.013483	0	0	0.00979	0	0	0.023141	0	0.128281	0	0	0	0
chr1	65713902	65881552	DNAJC6	ENSG00000116675.11	+	10.1533	9.37627	8.32566	8.30695	8.34941	8.85254	7.48651	6.65709	5.6765	7.03424	6.48011	7.27793	19.6125	18.8269	18.9336	35.6141	41.8844	50.4125
chr1	65745139	65772204	RP5-1044H5.1	ENSG00000229294.1	-	0	0	0	0	0.009738	0	0	0	0	0.017651	0.036451	0	0	0	0	0	0.057903	0
chr1	65764438	65764663	RP5-1044H5.2	ENSG00000234144.1	-	0	0	0	0.160444	0	0	0	0	0	0.053317	0.158723	0	0	0	0	0	0	0
chr1	65881499	65881689	RNU2-15P	ENSG00000222624.1	+	0	0	0	0	0	0	0	0	0	0	0	0	0.005081	0	0	0.226899	0	0
chr1	65886248	66107242	LEPR	ENSG00000116678.14	+	6.02818	6.46541	6.89945	4.47609	5.97056	5.68187	6.15681	7.60423	7.23461	7.70153	8.10197	7.5689	10.9531	12.1185	10.6828	10.8441	13.8399	15.1902
chr1	65886270	65901690	LEPROT	ENSG00000213625.4	+	16.305	14.9145	16.2971	16.5144	16.6836	16.4359	25.5288	27.7688	26.4341	26.9322	26.3508	28.2944	28.7478	24.9504	24.6972	29.408	25.6501	26.1175
chr1	65952089	65959871	RP4-630A11.3	ENSG00000237852.1	+	0	0.087138	0.047722	0	0	0.132298	0.165903	0.324272	0.106856	0.364724	0.36041	0.213501	0	0.077328	0.412026	0.591952	0.414881	0
chr1	66037232	66037335	snoU13	ENSG00000238931.1	+	0.45926	0	0	0	0	0	0	0	0.056339	0	0	0	0	0	0	0	0	0
chr1	66041812	66044063	RP11-430H12.2	ENSG00000224570.1	-	0	0	0	0	0	0	0	0	0	0	0	0	0	0	0	0	0	0
chr1	66226743	66227035	RN7SL854P	ENSG00000239319.2	-	0	0	0	0	0	0	0	0	0	0	0	0	0	0	0	0	0	0
chr1	66258197	66840259	PDE4B	ENSG00000184588.13	+	9.45102	8.85126	8.70312	12.1557	11.971	10.8396	14.1403	14.1739	17.6989	16.7671	16.7122	17.9497	21.3736	20.709	17.1738	12.1683	11.6767	11.0458
chr1	66508183	66516401	RP11-397C12.1	ENSG00000227466.1	-	0	0	0	0	0	0	0	0	0	0	0	0	0	0	0	0	0	0
chr1	66560144	66560229	RNU4-88P	ENSG00000223152.1	-	0	0	0	0	0	0	0	0	0	0	0	0	0	0	0	0	0	0
chr1	66999066	67213982	SGIP1	ENSG00000118473.17	+	0.989387	1.4041	0.47403	1.43423	2.1663	2.29372	1.23579	1.14561	0.361738	2.0594	2.00728	1.27519	2.8715	2.77084	2.23607	5.79615	6.48082	5.62505
chr1	67094123	67094200	MIR3117	ENSG00000264720.1	+	0	0	0	0	0	0	0	0	0	0.215172	0	0	0	0.185714	0	0.240079	0	0
chr1	67131547	67142710	AL139147.1	ENSG00000248458.2	-	0	0	0	0	0	0	0	0	0	0	0	0	0	0	0	0	0	0
chr1	67196650	67196741	AL354978.1	ENSG00000221655.2	-	0	0	0	0	0	0	0	0	0	0	0	0	0	0	0	0	0	0
chr1	67218142	67244470	TCTEX1D1	ENSG00000152760.5	+	3.13252	1.76148	2.48983	3.71139	3.01523	2.21077	2.10963	3.35023	3.84142	3.49104	2.83587	3.96848	9.99264	10.2996	11.6413	5.9574	5.3758	5.61751
chr1	67263424	67266939	INSL5	ENSG00000172410.4	-	0	0	0	0	0	0	0	0	0	0	0	0	0	0.057596	0	0	0	0
chr1	67278568	67390570	WDR78	ENSG00000152763.12	-	1.73781	0.332459	1.12196	0.286653	2.18414	1.2517	1.08979	3.62221	1.57121	2.34198	2.10608	2.08215	4.60756	4.22487	4.2236	2.37083	2.41359	2.46861
chr1	67292625	67294241	RP11-342H21.2	ENSG00000231080.1	+	0	0	0	0	0	0	0	0	0	0	0	0	0	0	0	0	0	0
chr1	67390578	67454302	MIER1	ENSG00000198160.10	+	41.8939	36.9975	39.7542	42.8409	35.4599	38.7939	29.771	28.1348	29.8531	28.3507	29.6888	34.7385	30.388	32.3558	32.9149	31.9157	34.2468	38.3716
chr1	67465015	67519782	SLC35D1	ENSG00000116704.6	-	2.59473	2.28479	2.15663	2.55307	2.31578	2.73535	4.45613	4.23224	4.1427	4.40454	3.83643	4.55779	5.40951	5.58326	5.37448	5.08298	4.81183	5.53992
chr1	67557848	67697536	C1orf141	ENSG00000203963.7	-	0	0	0	0	0	0	0	0	0	0	0	0	0.009186	0	0.040155	0.032942	0	0
chr1	67568328	67568462	SNORA31	ENSG00000252433.1	-	0	0	0	0	0	0	0	0	0	0	0	0	0	0	0	0	0	0
chr1	67632083	67725662	IL23R	ENSG00000162594.10	+	0	0	0	0	0	0	0	0	0	0.00436	0	0	0	0.07328	0	0	0	0.013939
chr1	67661823	67661926	RNU6-586P	ENSG00000253074.1	+	0	0	0	0	0	0	0	0	0	0	0	0	0	0	0	0	0	0
chr1	67705123	67705210	AL109843.1	ENSG00000221733.1	-	0	0	0	0	0	0	0	0	0	0	0	0	0	0	0	0	0	0
chr1	67733284	67733409	RNU4ATAC4P	ENSG00000252116.1	-	0	0	0	0	0	0	0	0	0	0	0	0	0	0	0	0	0	0
chr1	67743735	67744462	RP4-763G1.1	ENSG00000228523.1	+	0.010815	0.00939	0.02797	0.029246	0	0.055478	0	0	0	0.011576	0.070804	0.017048	0.031987	0	0	0.018618	0	0
chr1	67773047	67862583	IL12RB2	ENSG00000081985.6	+	1.12811	1.14557	1.34293	2.32914	1.29018	0.888496	0.842405	0.624716	1.43954	1.08763	1.2619	1.25944	0.665577	0.645595	0.571617	0.59384	0.626828	0.66084
chr1	67873493	67896098	SERBP1	ENSG00000142864.10	-	1077.52	1112.95	1110.95	996.356	1047.7	1051.58	511.13	553.98	563.852	567.628	575.183	580.707	600.745	648.006	608.742	568.697	626.874	600.183
chr1	67882897	67883001	RNU6-387P	ENSG00000223263.1	+	0	0	0	0	0	0	0	0	0	0	0	0	0	0	0	0	0	0
chr1	67995313	67998012	RP4-763G1.2	ENSG00000235200.1	+	0	0	0	0	0	0	0	0	0	0	0	0	0	0	0	0	0	0
chr1	68006810	68006916	RNU6-1031P	ENSG00000207504.1	+	0	0	0	0	0	0	0	0	0	0	0	0	0	0	0	0	0	0
chr1	68026756	68027129	RP11-393N21.1	ENSG00000238139.2	+	0	0	0	0	0	0	0	0	0	0	0	0	0	0	0	0	0	0
chr1	68122516	68122812	RN7SL392P	ENSG00000242482.2	-	0	0	0	0	0	0	0	0	0	0	0	0	0	0	0	0	0	0
chr1	68125838	68126696	HNRNPCP9	ENSG00000232048.2	-	0	0	0	0	0	0	0	0	0	0	0	0	0	0	0	0	0	0
chr1	68150744	68154021	GADD45A	ENSG00000116717.7	+	11.5386	11.1605	12.6634	13.298	13.0837	14.1369	15.0846	16.7071	13.9786	13.4993	12.9909	13.6482	27.6238	21.959	21.6462	16.3497	14.5557	15.9997
chr1	68167149	68299150	GNG12	ENSG00000172380.5	-	24.1767	26.0863	25.1712	23.928	22.8939	22.9604	8.1162	8.15321	8.16274	9.60625	9.0978	9.8791	12.2821	13.4734	10.4737	12.3482	12.8705	12.846
chr1	68238276	68238336	RNU7-80P	ENSG00000238778.1	-	0	0	0	0	0	0	0	0	0	0	0	0	0	0	0	0	0	0
chr1	68297986	68668670	GNG12-AS1	ENSG00000232284.3	+	0.114027	0.044778	0	0.241167	0.015062	0	0	0	0	0.050739	0	0	0	0	0.108699	0.039719	0	0.018197
chr1	68509013	68509916	RP4-609E1.2	ENSG00000235055.3	+	0	0	0	0	0	0	0	0	0	0	0	0	0	0	0	0	0	0
chr1	68511645	68517314	DIRAS3	ENSG00000162595.4	-	0.114865	0.011518	0	0	0	0.048433	0.026544	0.002595	0.047516	0.11004	0	0.074884	0.215642	0.650587	0.207229	0.047185	0.048432	0
chr1	68515043	68515428	ARL5AP3	ENSG00000228431.1	-	0	0	0	0	0	0	0.0251	0	0.092523	0	0	0	0.010683	0	0	0.074156	0.133035	0
chr1	68523860	68523945	AL157407.1	ENSG00000263542.1	+	0	0	0	0	0	0	0	0	0	0	0	0	0	0	0	0	0	0
chr1	68564142	68698803	WLS	ENSG00000116729.9	-	1.60431	2.00195	1.63489	1.33049	1.29337	1.54608	5.62853	6.30589	5.35173	5.80069	5.20151	4.99423	49.2738	60.4143	60.8555	18.8586	20.7131	20.5151
chr1	68627444	68628773	CTBP2P8	ENSG00000234383.1	-	0.237474	0.053309	0.132804	0.047606	0.125968	0.196093	0.10297	0.253903	0.092305	0.063095	0.107519	0.051076	0.226334	0.029718	0.082967	0.051592	0.066175	0.452151
chr1	68649201	68649293	MIR1262	ENSG00000221203.1	-	0	0	0	0	0	0	0	0	0	0	0	0	0	0.062304	0	0	0	0
chr1	68708157	68708738	RPS7P4	ENSG00000229133.1	-	0.518105	0.587607	1.03538	0.412157	0.652053	0.603008	0.459371	0.605149	0.282849	0.78009	0.706092	0.273936	0.494093	0.600193	0.297579	0.853493	0.784544	0.741106
chr1	68748071	68748305	COX6B1P7	ENSG00000225242.2	+	0	0	0	0	0	0	0	0	0	0	0	0	0	0	0	0	0	0
chr1	68841010	68841346	TCEB1P18	ENSG00000237622.1	-	0	0	0	0.016002	0	0	0	0	0	0	0	0.049366	0	0	0	0	0	0
chr1	68847124	68847340	RP5-1033K19.2	ENSG00000229440.1	-	0	0	0	0	0	0	0	0	0	0	0	0	0	0	0	0	0	0
chr1	68894505	68915642	RPE65	ENSG00000116745.6	-	0	0	0	0	0	0	0	0	0	0	0	0	0	0	0	0	0	0
chr1	68939835	68962904	DEPDC1	ENSG00000024526.12	-	40.2733	41.5864	45.9062	37.7875	37.7241	41.1904	28.908	29.3703	33.3365	36.5861	35.9917	38.3059	32.8071	39.7486	36.7925	34.9521	42.9039	46.0193
chr1	68944812	68949222	RP4-694A7.2	ENSG00000233589.1	+	0.745681	0	0	1.16291	0	0	0	0	0	0	0	0.578949	0	0.567175	0	0	1.00365	0
chr1	68962359	69004310	RP4-694A7.4	ENSG00000234264.1	+	0.089863	0.110677	0.243521	0.168876	0.110487	0	0.301962	0.173293	0.392902	0.179454	0.276194	0.323996	0.229922	0.060571	0.284218	0	0	0
chr1	68980058	68980352	RP4-694A7.3	ENSG00000225167.1	-	0	0	0	0	0	0	0	0	0	0	0	0	0	0	0	0	0	0
chr1	69521581	69650686	RP11-424D14.1	ENSG00000223883.1	+	0	0	0.054591	0	0	0	0	0	0	0	0	0	0	0	0	0	0	0
chr1	69709055	69715106	RP11-74K19.1	ENSG00000235446.1	-	0	0	0	0	0	0	0	0	0	0	0	0	0	0	0	0	0	0
chr1	69898938	69901092	RP3-380B4.1	ENSG00000229639.1	+	0	0	0	0	0	0	0	0.231022	0	0	0	0.29967	0	0	0	0	0	0
chr1	70034081	70617628	LRRC7	ENSG00000033122.14	+	0.016299	0.045615	0.043253	0.038708	0.042051	0.058364	0.214756	0.20426	0.055796	0.236328	0.121397	0.22758	0.305435	0.311957	0.495579	0.086048	0.016068	0.025336
chr1	70072538	70073984	RP11-379C1.1	ENSG00000270615.1	-	0	0	0	0	0	0	0	0	0	0	0	0	0	0	0	0	0	0
chr1	70345275	70345577	RN7SL538P	ENSG00000240692.2	+	0	0	0	0	0	0	0	0	0	0	0	0	0	0	0	0	0	0
chr1	70385005	70386000	PIN1P1	ENSG00000229359.2	+	0	0	0	0	0	0	0	0	0	0	0	0	0	0	0	0	0	0
chr1	70479665	70496905	RP11-181B18.1	ENSG00000237919.1	-	0	0	0	0	0	0	0	0	0	0	0	0	0	0	0	0	0	0
chr1	70610488	70671303	LRRC40	ENSG00000066557.5	-	46.5837	47.5755	48.5504	45.0143	46.5032	47.2445	49.0863	49.4083	51.3995	53.3763	56.0959	59.7427	42.1588	46.2135	43.3619	43.3446	47.4565	45.1921
chr1	70645829	70646123	RN7SL242P	ENSG00000244389.2	-	0	0	0	0	0	0	0	0	0.080394	0	0	0	0	0	0	0	0.088831	0
chr1	70671365	70718735	SRSF11	ENSG00000116754.9	+	258.263	209.413	252.408	261.445	242.441	257.283	242.509	212.827	240.41	213.355	191.645	251.299	278.303	270.161	278.275	296.785	339.231	351.798
chr1	70684272	70686706	RP4-677H15.4	ENSG00000228988.1	-	0	0	0	0	0	0	0	0	0	0	0	0	0	0	0	0	0	0
chr1	70726271	70820417	ANKRD13C	ENSG00000118454.8	-	22.0138	20.4122	20.698	22.4446	20.9762	21.089	19.3702	20.1555	21.0682	20.6213	20.5039	22.6962	19.2296	23.5319	19.7272	22.3768	22.2243	24.6591
chr1	70820488	70851022	HHLA3	ENSG00000197568.9	+	22.3905	19.6305	21.2663	18.7345	17.1672	16.6005	19.9846	19.0423	17.8735	22.1759	20.1775	22.3693	20.5315	18.1019	22.1865	20.2455	21.2716	19.6045
chr1	70825245	70826120	RP11-180O5.2	ENSG00000226088.1	-	0	0	0	0	0	0	0	0.039697	0.097048	0.179247	0.170716	0.272104	0	0	0	0	0	0
chr1	70876901	70905534	CTH	ENSG00000116761.7	+	22.9332	21.6636	24.8763	21.871	24.6372	24.0725	23.9046	24.5607	25.1195	26.1143	26.8622	26.4782	24.2074	23.3667	22.3059	21.2781	22.4483	23.5221
chr1	70910754	70911219	RP11-42O15.3	ENSG00000271992.1	+	3.13063	3.47433	4.43869	2.38224	2.63256	2.8765	1.84422	1.66401	2.22193	1.61333	3.30014	3.46036	3.09662	2.39267	2.04567	2.55403	2.29481	2.49586
chr1	70996209	70997175	RP11-42O15.2	ENSG00000233020.1	+	0	0.054453	0	0.073842	0.016812	0.052958	0.122668	0	0	0.041388	0	0.096465	0	0.012555	0	0.048966	0	0.055537
chr1	71126340	71126948	CASP3P1	ENSG00000237033.2	-	0	0	0	0	0	0	0	0	0.043982	0	0	0	0	0	0	0	0	0.02102
chr1	71172136	71252151	RP5-952N6.1	ENSG00000229051.1	+	0	0	0	0.036236	0.054292	0	0	0	0	0	0	0	0	0	0	0	0	0
chr1	71181616	71185972	RP11-99H8.1	ENSG00000226208.1	-	0	0	0	0	0	0	0	0	0	0	0	0	0	0	0	0	0	0
chr1	71318036	71513491	PTGER3	ENSG00000050628.16	-	0.228907	0.201142	0.14679	0.317534	0.167851	0.191091	0.06717	0.005927	0.074049	0.089009	0.172735	0.206805	0.067572	0.14748	0.050239	0.769192	0.486277	0.623181
chr1	71413062	71417176	RP3-333A15.1	ENSG00000235782.1	+	0	0	0	0	0	0	0	0	0	0	0	0	0	0	0	0	0	0
chr1	71471537	71472185	RP3-333A15.2	ENSG00000269933.1	-	0	0	0	0	0	0	0	0	0	0	0.051537	0	0	0	0	0	0.081571	0
chr1	71514538	71532867	ZRANB2-AS1	ENSG00000235079.1	+	0	0	0.176981	0.106377	0	0	0	0.029351	0	0.019567	0	0	0	0	0.245531	0.409178	0	0
chr1	71528974	71546980	ZRANB2	ENSG00000132485.8	-	116.23	122.562	126.62	121.948	121.805	125.595	124.281	120.851	129.242	122.414	127.421	146.437	125.051	120.644	128.266	122.827	114.743	129.132
chr1	71533314	71533399	MIR186	ENSG00000207721.1	-	4.06163	5.5653	5.99311	5.67256	3.97633	7.13645	8.13576	9.59458	7.44902	7.42343	4.62484	7.40617	7.62955	6.71347	3.85775	8.89957	13.7551	10.5869
chr1	71547007	71955652	ZRANB2-AS2	ENSG00000229956.5	+	0.088458	0	0.346641	0.3902	0	0.149348	0.474653	0.623871	0.81768	0.265113	0.505819	0.587204	1.05526	1.05134	1.31974	0.72569	0.994383	0.563054
chr1	71607658	71607751	AL360297.1	ENSG00000264239.1	-	0	0	0	0	0	0	0	0	0	0	0	0	0	0	0	0	0	0
chr1	71716682	71717802	RP11-386O9.2	ENSG00000237726.1	+	0	0	0	0	0	0	0	0	0	0	0	0	0	0	0	0	0	0
chr1	71832737	71832986	RP11-115M14.1	ENSG00000226324.1	-	0	0	0	0	0	0	0	0	0	0	0	0	0	0	0	0	0	0
chr1	71861623	72748417	NEGR1	ENSG00000172260.9	-	0.774972	0.890556	0.926612	0.979217	0.699706	0.855081	1.86672	1.9	1.79437	2.08564	2.65853	1.99013	1.81624	1.93047	2.03562	1.57123	1.88507	1.53587
chr1	72036639	72039241	RP11-82L20.1	ENSG00000231985.1	+	0	0	0	0	0	0	0	0	0	0	0	0	0.078477	0	0	0	0.526282	0
chr1	72203856	72204037	RP11-175G14.2	ENSG00000271618.1	+	0	0	0	0	0	0	0	0	0	0	0	0	0	0	0	0	0	0
chr1	72259915	72302695	NEGR1-IT1	ENSG00000228853.1	-	0	0	0	0	0	0	0	0	0	0	0	0	0	0	0	0	0	0
chr1	72740235	72740842	GDI2P2	ENSG00000233994.2	+	10.6456	7.34938	9.83454	10.7751	8.88757	14.9817	6.99557	8.13751	8.70427	7.69487	9.85085	8.34809	7.71085	9.05288	6.43956	7.61232	9.14841	8.19612
chr1	72767155	72767512	RPL31P12	ENSG00000227207.2	+	0.10556	0.077413	0.506249	0.084534	0.073892	0	0.051201	0.172208	0.015587	0.249431	0	0.15324	0.062335	0.135994	0.127577	0	0	0.086344
chr1	73183346	73183452	RNU6-1246P	ENSG00000212366.1	-	1.16501	0.212386	0	0	0	0	0	0.139557	0.226862	0	0	0	0	0	0	0	0	0
chr1	73214604	73364823	RP4-660H19.1	ENSG00000225087.1	-	1.2864	0.794756	0.725083	0.508102	0.965272	1.2741	0	0	0.641341	0.349277	0.074801	0.610821	0.54784	0	0	0	0	0
chr1	73230714	73245974	RP11-262K1.1	ENSG00000227016.2	+	0	0	0	0	0	0	0	0	0	0	0	0	0	0	0	0	0	0
chr1	73570475	73571965	KRT8P21	ENSG00000229636.2	+	0	0	0	0	0	0.018944	0	0	0	0	0	0	0	0	0	0	0	0
chr1	73657287	73657538	RN7SKP19	ENSG00000251825.1	-	0	0	0	0	0	0	0	0	0	0	0	0	0	0	0	0	0	0
chr1	73771853	73820934	RP4-598G3.1	ENSG00000233973.1	+	0	0	0	0	0	0	0	0	0	0	0	0	0	0	0	0	0	0
chr1	74100899	74180897	RP4-788P17.1	ENSG00000223479.3	+	0	0	0	0	0	0	0	0	0	0	0	0	0	0	0	0	0	0
chr1	74215200	74215306	RNA5SP50	ENSG00000200601.1	-	0	0	0	0	0	0	0	0	0	0	0	0	0	0	0	0	0	0
chr1	74349396	74349505	RNU4ATAC8P	ENSG00000252005.1	+	0	0	0	0	0	0	0	0	0	0	0	0	0	0	0	0	0	0
chr1	74491699	74663871	LRRIQ3	ENSG00000162620.11	-	0	0	0	0	0	0	0	0	0	0	0	0	0	0	0	0	0	0
chr1	74663896	74699770	FPGT	ENSG00000254685.2	+	0	0	0	0.016283	0	0	0	0	0	0	0	0	0	0.02398	0.053112	0	0	0
chr1	74663919	75009666	FPGT-TNNI3K	ENSG00000259030.2	+	0	0	0	0	0	0	0	0	0	0	0	0	0	0	0	0	0	0
chr1	74663947	75010112	TNNI3K	ENSG00000116783.10	+	0.072894	0.033487	0	0	0.065243	0.01615	0	0	0	0	0	0	0	0	0	0	0.061215	0
chr1	74807263	74844486	RP11-439H8.4	ENSG00000237324.2	-	0	0	0	0	0	0	0	0	0	0	0	0	0	0	0	0	0	0
chr1	74933879	74935227	RP4-650F12.2	ENSG00000233894.1	+	0	0	0	0	0	0	0	0	0	0	0	0	0	0	0	0.096986	0	0
chr1	74935562	74978298	LRRC53	ENSG00000162621.5	-	0	0	0	0	0	0	0	0	0	0	0	0	0	0	0	0	0	0
chr1	75033795	75139422	C1orf173	ENSG00000178965.9	-	0	0	0	0	0	0	0	0.009565	0	0	0	0	0	0	0	0	0	0
chr1	75055419	75087403	RP4-612J11.1	ENSG00000234497.1	+	0	0	0	0	0	0	0	0	0	0	0	0	0	0	0	0	0	0
chr1	75164453	75165017	RP11-17E13.2	ENSG00000272864.1	-	0	0	0.212814	0	0	0	0	0.052481	0.44741	0.306572	0.392947	0.113923	0.492001	0.119768	0	0.43134	0.145701	0
chr1	75171170	75199092	CRYZ	ENSG00000116791.9	-	30.0653	31.3794	33.216	31.8063	29.2174	33.1509	30.3923	26.4259	25.6162	26.7691	29.5335	28.7667	30.1144	33.2181	30.5535	31.3366	35.352	37.949
chr1	75198836	75232362	TYW3	ENSG00000162623.11	+	37.9376	42.4452	42.6914	43.5647	38.1478	40.1462	29.7959	29.4756	29.9687	31.0051	32.6503	31.9993	27.3866	28.4669	27.9012	23.7331	25.9307	22.2395
chr1	75428998	75430802	RP11-93N20.1	ENSG00000229943.1	+	0	0	0	0	0	0	0	0	0	0	0	0	0	0	0	0	0	0
chr1	75588203	75589612	RP11-510C10.4	ENSG00000261213.1	-	0.033502	0	0.052286	0	0	0	0	0	0	0	0	0	0	0	0	0	0	0
chr1	75593515	75598743	RP11-510C10.2	ENSG00000224127.1	-	0	0	0	0	0	0	0	0	0	0	0	0	0	0	0	0	0	0
chr1	75594119	75627218	LHX8	ENSG00000162624.10	+	0.515658	0.874939	0.505368	0.759784	0.43995	0.658592	0	0	0	0	0	0	0	0	0	0	0	0
chr1	75595659	75598261	RP11-510C10.3	ENSG00000224149.1	-	0	0	0	0	0	0	0	0	0	0	0	0	0	0	0	0	0	0
chr1	75648730	75648832	RNU6-622P	ENSG00000206999.1	+	0	0	0	0	0	0	0	0	0	0	0	0	0	0	0	0	0	0
chr1	75667816	76076801	SLC44A5	ENSG00000137968.12	-	2.44473	1.88222	1.89746	2.6947	2.3207	2.51083	2.67069	1.85398	2.34578	3.39934	2.5382	3.76508	4.22142	4.04103	3.99727	6.12676	5.38114	6.49608
chr1	75987247	75987916	RP11-87O11.1	ENSG00000224493.1	+	0	0	0	0.083261	0	0.076434	0	0	0	0.241506	0	0.007094	0	0	0	0.07187	0	0.010252
chr1	76003700	76003804	RNU6-503P	ENSG00000252338.1	-	0	0	0	0	0	0	0	0	0	0	0	0	0	0	0	0	0	0
chr1	76047784	76048240	RP4-595K12.1	ENSG00000213579.3	+	0.058574	0	0	0.00415	0	0.081618	0	0.022904	0	0.028956	0.050384	0.060239	0	0.083319	0	0	0.127426	0
chr1	76107031	76107772	RP4-595K12.2	ENSG00000230863.2	-	0.292498	0.308885	0.161555	0.059394	0	0.302394	0.20539	0.200098	0.1553	0.118992	0.370421	0.341117	0.156589	0.263368	0.180229	0.572167	0.376119	0.296243
chr1	76175688	76189696	RP4-682C21.5	ENSG00000178193.5	-	0	0	0	0	0	0	0	0	0	0	0	0	0.140845	0	0	0	0	0
chr1	76190036	76253260	ACADM	ENSG00000117054.9	+	47.527	48.3288	42.0713	44.813	48.7316	47.8131	63.9016	61.501	63.641	64.0246	64.3242	67.6904	63.6594	70.2532	63.6347	67.2612	68.1084	64.5655
chr1	76209103	76210461	RP4-682C21.2	ENSG00000181227.2	-	0.232198	0.356451	0.246235	0.104854	0.27352	0.394496	0.201516	0.136281	0.241098	0.263005	0.38737	0.064019	0.460768	0.216644	0.45241	0.456101	0.139778	0.294938
chr1	76251879	76260764	RABGGTB	ENSG00000137955.11	+	136.918	133.246	142.583	150.287	140.187	136.991	91.9618	89.7057	101.04	94.4625	97.2519	107.653	104.729	104.475	98.8402	97.1557	108.811	106.368
chr1	76252757	76252835	SNORD45C	ENSG00000206620.1	+	0.001558	0.001061	0.002534	0.003054	0.007955	0.065028	0.002232	0.001843	0.000484	0.001689	0.000971	0.0013	0.00151	0.001701	0.001427	0.002097	0.001609	0.002651
chr1	76253574	76253657	SNORD45A	ENSG00000207241.1	+	0.000544	0.000486	0.000443	0.001197	0.000842	0.00154	0.000923	0.000959	0.001445	0.002755	0.000882	0.000996	0.000822	0.007003	0.007546	0.000414	0.000381	0.000668
chr1	76255162	76255233	SNORD45B	ENSG00000201487.1	+	0.000602	0.000402	0.000244	0.000771	0.001057	0.000597	0.001131	0.000382	0.000581	0.000527	0.000649	0.000683	0.000677	0.00052	0.001551	0.000264	0.000391	0.040589
chr1	76262567	76378923	MSH4	ENSG00000057468.6	+	0.12953	0.041494	0.073564	0.063796	0.073149	0.043483	0.157947	0.18883	0.137286	0.188687	0.094471	0.167306	0.105909	0.117472	0.093863	0.062005	0.087936	0.084798
chr1	76308317	76308402	AL445464.1	ENSG00000266832.1	+	0	0	0	0	0	0	0	0	0	0	0	0	0	0	0	0	0	0
chr1	76384558	76398116	ASB17	ENSG00000154007.6	-	0	0	0	0	0	0	0	0	0	0	0	0	0	0	0	0	0	0
chr1	76477009	76485041	RP11-550H2.1	ENSG00000225605.1	+	0	0	0	0	0	0	0	0	0	0	0	0	0	0	0	0	0	0
chr1	76507376	76531913	RP11-550H2.2	ENSG00000230027.1	+	0	0	0	0	0	0	0	0.070573	0	0	0	0	0	0	0	0	0	0
chr1	76540404	77100286	ST6GALNAC3	ENSG00000184005.9	+	10.2393	10.8083	10.8907	9.32137	9.49769	10.2873	5.23019	5.03351	5.63318	6.36063	5.74662	6.50943	4.75259	4.79862	4.72312	5.45731	6.56288	5.80497
chr1	76819268	76819931	RP11-335E14.1	ENSG00000223905.1	-	0	0	0	0	0	0	0	0	0	0	0	0	0	0	0	0	0	0
chr1	77102562	77103024	RP5-1102E8.3	ENSG00000272855.1	+	0.294176	0.448926	0.919839	0.393989	0.511533	0.533645	0	0.26078	0.37001	0.20123	0.486319	0.573191	0.051342	0.133638	0.086019	0.652901	0.182945	0.250866
chr1	77165474	77166223	TPI1P1	ENSG00000226415.1	+	12.9902	13.0391	14.048	14.7484	13.3608	20.3154	6.34884	7.42513	7.49514	5.83361	7.36401	5.74172	5.90276	6.56514	6.53046	10.4656	11.3011	10.5595
chr1	77183825	77183926	AC104458.1	ENSG00000264686.1	+	0	0	0	0	0	0	0	0	0	0	0	0	0	0	0	0	0	0
chr1	77218820	77218925	RNU6-161P	ENSG00000199921.1	+	0	0	0	0	0	0	0	0	0	0	0	0	0	0	0	0	0	0
chr1	77223809	77244952	RP11-415A20.1	ENSG00000237552.1	-	0	0	0	0	0	0	0	0	0	0	0	0	0	0	0	0	0	0
[truncated: 55,862 more rows]

## Sheet: Day 5 DEG EN
gene_ID	gene_name	D0_log2FC	D0_padj	D3_log2FC	D3_padj	D5_log2FC	D5_padj
ENSG00000000005.5	TNMD	NA	NA	NA	NA	NA	NA
ENSG00000001617.7	SEMA3F	NA	NA	NA	NA	NA	NA
ENSG00000001626.10	CFTR	NA	NA	NA	NA	-2.34306	1.94492e-10
ENSG00000002587.5	HS3ST1	NA	NA	NA	NA	-1.78229	0.000310402
ENSG00000002726.15	AOC1	NA	NA	NA	NA	NA	NA
ENSG00000002746.10	HECW1	NA	NA	NA	NA	NA	NA
ENSG00000003402.15	CFLAR	NA	NA	NA	NA	-1.62432	1.30379e-86
ENSG00000003436.10	TFPI	NA	NA	NA	NA	-2.95948	2.85588e-155
ENSG00000003509.11	NDUFAF7	NA	NA	NA	NA	1.18009	3.27926e-45
ENSG00000003989.12	SLC7A2	NA	NA	NA	NA	-1.51836	2.82846e-53
ENSG00000004139.9	SARM1	NA	NA	NA	NA	NA	NA
ENSG00000004799.7	PDK4	NA	NA	NA	NA	NA	NA
ENSG00000004948.9	CALCR	NA	NA	NA	NA	NA	NA
ENSG00000005001.5	PRSS22	NA	NA	NA	NA	NA	NA
ENSG00000005059.11	CCDC109B	NA	NA	NA	NA	NA	NA
ENSG00000005187.7	ACSM3	NA	NA	NA	NA	NA	NA
ENSG00000005379.11	BZRAP1	NA	NA	NA	NA	NA	NA
ENSG00000005471.11	ABCB4	NA	NA	NA	NA	NA	NA
ENSG00000006016.6	CRLF1	NA	NA	NA	NA	NA	NA
ENSG00000006128.7	TAC1	NA	NA	NA	NA	NA	NA
ENSG00000006210.6	CX3CL1	NA	NA	NA	NA	NA	NA
ENSG00000006468.9	ETV1	NA	NA	NA	NA	NA	NA
ENSG00000006606.4	CCL26	NA	NA	NA	NA	NA	NA
ENSG00000006611.11	USH1C	NA	NA	NA	NA	NA	NA
ENSG00000006747.10	SCIN	NA	NA	NA	NA	NA	NA
ENSG00000007062.7	PROM1	NA	NA	NA	NA	-1.0003	7.64897e-30
ENSG00000007171.12	NOS2	NA	NA	NA	NA	1.13142	0.000638817
ENSG00000007174.13	DNAH9	NA	NA	NA	NA	2.64966	6.25095e-93
ENSG00000007216.10	SLC13A2	NA	NA	NA	NA	NA	NA
ENSG00000007372.16	PAX6	NA	NA	NA	NA	NA	NA
ENSG00000007402.7	CACNA2D2	NA	NA	NA	NA	1.61107	1.42996e-49
ENSG00000007516.9	BAIAP3	NA	NA	NA	NA	NA	NA
ENSG00000008118.5	CAMK1G	NA	NA	NA	NA	NA	NA
ENSG00000008226.15	DLEC1	NA	NA	NA	NA	NA	NA
ENSG00000008513.10	ST3GAL1	NA	NA	NA	NA	NA	NA
ENSG00000008516.12	MMP25	NA	NA	NA	NA	NA	NA
ENSG00000008517.12	IL32	NA	NA	NA	NA	NA	NA
ENSG00000009950.11	MLXIPL	NA	NA	NA	NA	-1.87065	6.58413e-25
ENSG00000010278.7	CD9	NA	NA	NA	NA	NA	NA
ENSG00000010310.4	GIPR	NA	NA	NA	NA	NA	NA
ENSG00000010319.2	SEMA3G	NA	NA	1.13655	2.01221e-12	3.30089	3.32558e-246
ENSG00000010671.11	BTK	NA	NA	NA	NA	NA	NA
ENSG00000011028.9	MRC2	NA	NA	NA	NA	NA	NA
ENSG00000011201.6	KAL1	NA	NA	NA	NA	NA	NA
ENSG00000012504.9	NR1H4	NA	NA	NA	NA	3.39469	1.30003e-22
ENSG00000012779.6	ALOX5	NA	NA	NA	NA	NA	NA
ENSG00000013016.10	EHD3	NA	NA	NA	NA	1.11405	8.00186e-49
ENSG00000013293.5	SLC7A14	NA	NA	NA	NA	NA	NA
ENSG00000014257.11	ACPP	NA	NA	NA	NA	NA	NA
ENSG00000014914.15	MTMR11	NA	NA	NA	NA	NA	NA
ENSG00000015413.5	DPEP1	NA	NA	NA	NA	NA	NA
ENSG00000015520.10	NPC1L1	NA	NA	NA	NA	NA	NA
ENSG00000016082.10	ISL1	NA	NA	NA	NA	-2.74359	5.206e-36
ENSG00000017427.11	IGF1	NA	NA	NA	NA	4.40166	1.15013e-08
ENSG00000017483.10	SLC38A5	NA	NA	NA	NA	NA	NA
ENSG00000018236.10	CNTN1	NA	NA	NA	NA	1.29695	1.53604e-44
ENSG00000018625.10	ATP1A2	NA	NA	NA	NA	NA	NA
ENSG00000019102.7	VSIG2	NA	NA	NA	NA	-1.72782	0.00219583
ENSG00000019505.3	SYT13	NA	NA	NA	NA	NA	NA
ENSG00000020181.13	GPR124	NA	NA	NA	NA	NA	NA
ENSG00000020577.9	SAMD4A	NA	NA	NA	NA	NA	NA
ENSG00000021645.13	NRXN3	NA	NA	NA	NA	NA	NA
ENSG00000021762.15	OSBPL5	NA	NA	NA	NA	NA	NA
ENSG00000022355.10	GABRA1	NA	NA	NA	NA	NA	NA
ENSG00000023839.6	ABCC2	NA	NA	NA	NA	NA	NA
ENSG00000024422.7	EHD2	NA	NA	NA	NA	1.53645	2.07293e-47
ENSG00000026025.9	VIM	NA	NA	NA	NA	NA	NA
ENSG00000026103.15	FAS	NA	NA	NA	NA	1.70693	4.24351e-05
ENSG00000026508.12	CD44	NA	NA	NA	NA	NA	NA
ENSG00000026559.9	KCNG1	NA	NA	NA	NA	NA	NA
ENSG00000029534.15	ANK1	NA	NA	NA	NA	NA	NA
ENSG00000031081.6	ARHGAP31	NA	NA	NA	NA	NA	NA
ENSG00000033122.14	LRRC7	NA	NA	NA	NA	-2.7416	2.5173e-05
ENSG00000035664.7	DAPK2	NA	NA	NA	NA	1.60534	4.19368e-34
ENSG00000038427.11	VCAN	NA	NA	NA	NA	NA	NA
ENSG00000038945.10	MSR1	NA	NA	NA	NA	-2.25415	4.27571e-11
ENSG00000039987.2	BEST2	NA	NA	NA	NA	NA	NA
ENSG00000040731.6	CDH10	NA	NA	NA	NA	NA	NA
ENSG00000041515.11	MYO16	NA	NA	NA	NA	-1.39667	9.85307e-13
ENSG00000041982.10	TNC	NA	NA	NA	NA	NA	NA
ENSG00000042980.8	ADAM28	NA	NA	NA	NA	NA	NA
ENSG00000047648.17	ARHGAP6	NA	NA	NA	NA	1.26632	4.89523e-05
ENSG00000048052.17	HDAC9	NA	NA	NA	NA	NA	NA
ENSG00000048540.10	LMO3	NA	NA	NA	NA	-1.74568	0.00500468
ENSG00000049130.9	KITLG	NA	NA	NA	NA	-2.74566	7.45847e-104
ENSG00000049192.10	ADAMTS6	NA	NA	NA	NA	1.26838	1.24268e-30
ENSG00000049540.12	ELN	NA	NA	NA	NA	NA	NA
ENSG00000049759.12	NEDD4L	NA	NA	NA	NA	NA	NA
ENSG00000049769.8	PPP1R3F	NA	NA	NA	NA	NA	NA
ENSG00000050030.9	KIAA2022	NA	NA	NA	NA	NA	NA
ENSG00000050438.12	SLC4A8	NA	NA	NA	NA	2.08821	4.21903e-117
ENSG00000050767.11	COL23A1	NA	NA	NA	NA	1.51988	2.5649e-85
ENSG00000053328.8	METTL24	NA	NA	NA	NA	NA	NA
ENSG00000053524.7	MCF2L2	NA	NA	NA	NA	NA	NA
ENSG00000054356.9	PTPRN	NA	NA	NA	NA	NA	NA
ENSG00000054598.5	FOXC1	NA	NA	NA	NA	-1.92227	5.48499e-48
ENSG00000054938.11	CHRDL2	NA	NA	NA	NA	NA	NA
ENSG00000055163.14	CYFIP2	NA	NA	NA	NA	1.39955	1.21118e-85
ENSG00000055813.5	CCDC85A	NA	NA	NA	NA	1.40419	0.0117874
ENSG00000056291.13	NPFFR2	NA	NA	NA	NA	NA	NA
ENSG00000056558.6	TRAF1	NA	NA	NA	NA	NA	NA
ENSG00000057593.9	F7	NA	NA	NA	NA	NA	NA
ENSG00000057657.10	PRDM1	NA	NA	NA	NA	NA	NA
ENSG00000058091.12	CDK14	NA	NA	NA	NA	NA	NA
ENSG00000059377.11	TBXAS1	NA	NA	NA	NA	-1.24224	1.45652e-06
ENSG00000059728.6	MXD1	NA	NA	NA	NA	NA	NA
ENSG00000060566.9	CREB3L3	NA	NA	NA	NA	NA	NA
ENSG00000060709.9	RIMBP2	NA	NA	NA	NA	1.95721	2.24721e-17
ENSG00000060718.14	COL11A1	NA	NA	NA	NA	-1.11058	1.47536e-35
ENSG00000061492.7	WNT8A	NA	NA	NA	NA	NA	NA
ENSG00000063015.15	SEZ6	NA	NA	NA	NA	NA	NA
ENSG00000063127.11	SLC6A16	NA	NA	NA	NA	NA	NA
ENSG00000063180.4	CA11	NA	NA	NA	NA	NA	NA
ENSG00000064042.13	LIMCH1	NA	NA	NA	NA	1.36492	9.75735e-30
ENSG00000064270.8	ATP2C2	NA	NA	NA	NA	NA	NA
ENSG00000064300.4	NGFR	NA	NA	NA	NA	2.11862	3.67459e-31
ENSG00000064655.14	EYA2	NA	NA	NA	NA	1.04397	3.49231e-16
ENSG00000064763.6	FAR2	NA	NA	NA	NA	NA	NA
ENSG00000065320.4	NTN1	NA	NA	NA	NA	-1.19906	7.42794e-05
ENSG00000065609.10	SNAP91	NA	NA	NA	NA	1.22491	2.01792e-08
ENSG00000065618.12	COL17A1	NA	NA	NA	NA	-1.82768	1.13378e-12
ENSG00000065809.9	FAM107B	NA	NA	NA	NA	1.19011	5.72496e-66
ENSG00000066032.14	CTNNA2	NA	NA	NA	NA	NA	NA
ENSG00000066056.9	TIE1	NA	NA	NA	NA	2.27101	7.03516e-22
ENSG00000066185.8	ZMYND12	NA	NA	NA	NA	NA	NA
ENSG00000066230.6	SLC9A3	NA	NA	NA	NA	NA	NA
ENSG00000066405.8	CLDN18	NA	NA	NA	NA	NA	NA
ENSG00000066933.11	MYO9A	NA	NA	NA	NA	NA	NA
ENSG00000067113.12	PPAP2A	NA	NA	NA	NA	1.63781	6.42388e-76
ENSG00000067225.13	PKM	NA	NA	NA	NA	-1.03332	1.83774e-44
ENSG00000067840.8	PDZD4	NA	NA	NA	NA	NA	NA
ENSG00000068079.3	IFI35	NA	NA	NA	NA	NA	NA
ENSG00000068615.12	REEP1	NA	NA	NA	NA	-1.71916	6.39567e-18
ENSG00000069011.11	PITX1	NA	NA	NA	NA	-3.0281	2.66114e-13
ENSG00000069188.12	SDK2	NA	NA	NA	NA	-1.44517	3.38582e-28
ENSG00000069482.6	GAL	NA	NA	NA	NA	NA	NA
ENSG00000069667.11	RORA	NA	NA	NA	NA	-1.11211	1.72102e-30
ENSG00000069696.6	DRD4	NA	NA	NA	NA	-1.39452	0.03178
ENSG00000069764.5	PLA2G10	NA	NA	NA	NA	NA	NA
ENSG00000070182.13	SPTB	NA	NA	NA	NA	NA	NA
ENSG00000070193.4	FGF10	NA	NA	NA	NA	1.72502	6.85324e-09
ENSG00000070669.12	ASNS	NA	NA	NA	NA	NA	NA
ENSG00000070731.5	ST6GALNAC2	NA	NA	NA	NA	NA	NA
ENSG00000071282.7	LMCD1	NA	NA	NA	NA	NA	NA
ENSG00000071909.14	MYO3B	NA	NA	NA	NA	NA	NA
ENSG00000072201.9	LNX1	NA	NA	NA	NA	1.27031	1.07296e-28
ENSG00000072210.14	ALDH3A2	NA	NA	NA	NA	1.43643	5.91382e-46
ENSG00000072315.3	TRPC5	NA	NA	NA	NA	-2.02507	2.97807e-70
ENSG00000072657.4	TRHDE	NA	NA	NA	NA	2.9373	6.39567e-18
ENSG00000073008.10	PVR	NA	NA	NA	NA	2.30636	1.04265e-121
ENSG00000073331.13	ALPK1	NA	NA	NA	NA	NA	NA
ENSG00000073670.9	ADAM11	NA	NA	NA	NA	-1.09726	1.49455e-10
ENSG00000073803.9	MAP3K13	NA	NA	NA	NA	NA	NA
ENSG00000073910.15	FRY	NA	NA	NA	NA	1.10047	1.05025e-29
ENSG00000074211.9	PPP2R2C	NA	NA	NA	NA	1.08423	4.3271e-24
ENSG00000074276.6	CDHR2	NA	NA	NA	NA	NA	NA
ENSG00000074527.7	NTN4	NA	NA	NA	NA	-3.52995	5.46122e-237
ENSG00000074706.9	IPCEF1	NA	NA	NA	NA	NA	NA
ENSG00000075035.5	WSCD2	NA	NA	NA	NA	-1.36197	1.88984e-08
ENSG00000075223.9	SEMA3C	NA	NA	NA	NA	2.86315	1.16362e-28
ENSG00000075340.18	ADD2	NA	NA	NA	NA	NA	NA
ENSG00000075388.2	FGF4	NA	NA	NA	NA	NA	NA
ENSG00000075426.7	FOSL2	NA	NA	NA	NA	NA	NA
ENSG00000075429.4	CACNG5	NA	NA	NA	NA	NA	NA
ENSG00000075461.5	CACNG4	NA	NA	NA	NA	NA	NA
ENSG00000075673.7	ATP12A	NA	NA	NA	NA	-1.15	7.3143e-20
ENSG00000076351.8	SLC46A1	NA	NA	NA	NA	NA	NA
ENSG00000077009.9	NMRK2	NA	NA	NA	NA	NA	NA
ENSG00000077092.14	RARB	NA	NA	NA	NA	-1.80802	5.86625e-28
ENSG00000077279.12	DCX	NA	NA	NA	NA	NA	NA
ENSG00000077327.11	SPAG6	NA	NA	NA	NA	NA	NA
ENSG00000077616.6	NAALAD2	NA	NA	NA	NA	NA	NA
ENSG00000077943.7	ITGA8	NA	NA	NA	NA	-3.62821	1.812e-27
ENSG00000078018.15	MAP2	NA	NA	NA	NA	NA	NA
ENSG00000078328.15	RBFOX1	NA	NA	NA	NA	1.4502	3.25627e-18
ENSG00000078401.6	EDN1	NA	NA	NA	NA	1.408	2.48148e-06
ENSG00000078579.8	FGF20	NA	NA	NA	NA	-1.40871	2.25819e-11
ENSG00000078804.8	TP53INP2	NA	NA	NA	NA	NA	NA
ENSG00000078900.10	TP73	NA	NA	NA	NA	NA	NA
ENSG00000079101.12	CLUL1	NA	NA	NA	NA	NA	NA
ENSG00000079102.12	RUNX1T1	NA	NA	NA	NA	NA	NA
ENSG00000079215.9	SLC1A3	NA	NA	NA	NA	NA	NA
ENSG00000079385.17	CEACAM1	NA	NA	NA	NA	NA	NA
ENSG00000080224.13	EPHA6	NA	NA	NA	NA	NA	NA
ENSG00000080493.9	SLC4A4	NA	NA	NA	NA	-1.24019	1.34885e-13
ENSG00000080503.15	SMARCA2	NA	NA	NA	NA	NA	NA
ENSG00000080561.9	MID2	NA	NA	NA	NA	1.07003	4.10321e-21
ENSG00000080709.10	KCNN2	NA	NA	NA	NA	NA	NA
ENSG00000080823.17	MOK	NA	NA	NA	NA	-2.97019	8.11512e-120
ENSG00000081051.3	AFP	NA	NA	NA	NA	NA	NA
ENSG00000081052.10	COL4A4	NA	NA	NA	NA	NA	NA
ENSG00000081138.9	CDH7	NA	NA	NA	NA	NA	NA
ENSG00000081189.9	MEF2C	NA	NA	NA	NA	NA	NA
ENSG00000081479.8	LRP2	NA	NA	NA	NA	-1.11289	1.58868e-05
ENSG00000081923.6	ATP8B1	NA	NA	NA	NA	1.97371	1.59185e-69
ENSG00000081985.6	IL12RB2	NA	NA	NA	NA	NA	NA
ENSG00000082196.16	C1QTNF3	NA	NA	NA	NA	NA	NA
ENSG00000082293.8	COL19A1	NA	NA	NA	NA	2.5674	1.85545e-25
ENSG00000082497.7	SERTAD4	NA	NA	NA	NA	NA	NA
ENSG00000082556.6	OPRK1	NA	NA	NA	NA	NA	NA
ENSG00000082684.10	SEMA5B	NA	NA	NA	NA	NA	NA
ENSG00000083454.17	P2RX5	NA	NA	NA	NA	NA	NA
ENSG00000084207.11	GSTP1	NA	NA	NA	NA	1.04147	1.64503e-56
ENSG00000084674.9	APOB	NA	NA	NA	NA	-3.53265	6.12931e-164
ENSG00000084734.4	GCKR	NA	NA	NA	NA	1.43161	2.61746e-07
ENSG00000085276.13	MECOM	NA	NA	NA	NA	NA	NA
ENSG00000085465.11	OVGP1	NA	NA	NA	NA	1.28577	2.43204e-14
ENSG00000085552.12	IGSF9	NA	NA	NA	NA	NA	NA
ENSG00000085741.8	WNT11	NA	NA	NA	NA	NA	NA
ENSG00000086991.8	NOX4	NA	NA	NA	NA	1.96993	3.25463e-76
ENSG00000087008.11	ACOX3	NA	NA	NA	NA	NA	NA
ENSG00000087095.8	NLK	NA	NA	NA	NA	1.49822	6.84899e-55
ENSG00000087116.9	ADAMTS2	NA	NA	NA	NA	2.10459	8.84142e-59
ENSG00000087245.8	MMP2	NA	NA	NA	NA	1.0894	4.65478e-61
ENSG00000088340.11	FER1L4	NA	NA	NA	NA	NA	NA
ENSG00000088727.8	KIF9	NA	NA	NA	NA	1.05826	2.32697e-15
ENSG00000088836.8	SLC4A11	NA	NA	NA	NA	1.67815	5.44851e-30
ENSG00000088881.16	EBF4	NA	NA	NA	NA	NA	NA
ENSG00000088926.9	F11	NA	NA	NA	NA	NA	NA
ENSG00000088992.13	TESC	NA	NA	NA	NA	-1.22705	2.69268e-21
ENSG00000089199.5	CHGB	NA	NA	NA	NA	NA	NA
ENSG00000089250.14	NOS1	NA	NA	NA	NA	NA	NA
ENSG00000090565.11	RAB11FIP3	NA	NA	NA	NA	NA	NA
ENSG00000090975.8	PITPNM2	NA	NA	NA	NA	NA	NA
ENSG00000091010.4	POU4F3	NA	NA	NA	NA	-3.05466	0.0423006
ENSG00000091136.9	LAMB1	NA	NA	NA	NA	NA	NA
ENSG00000091262.10	ABCC6	NA	NA	NA	NA	-1.40403	1.32129e-11
ENSG00000091409.10	ITGA6	NA	NA	NA	NA	NA	NA
ENSG00000091428.13	RAPGEF4	NA	NA	NA	NA	1.25115	1.6e-05
ENSG00000091482.5	SMPX	NA	NA	NA	NA	NA	NA
ENSG00000091844.3	RGS17	NA	NA	NA	NA	1.3358	6.27513e-29
ENSG00000091879.9	ANGPT2	NA	NA	NA	NA	-1.53388	6.19014e-06
ENSG00000091986.11	CCDC80	NA	NA	NA	NA	-1.81834	7.44491e-44
ENSG00000092345.9	DAZL	NA	NA	NA	NA	NA	NA
ENSG00000092421.12	SEMA6A	NA	NA	NA	NA	1.04634	6.78461e-31
ENSG00000092850.7	TEKT2	NA	NA	NA	NA	NA	NA
ENSG00000092969.7	TGFB2	NA	NA	NA	NA	NA	NA
ENSG00000094755.12	GABRP	NA	NA	NA	NA	NA	NA
ENSG00000094963.9	FMO2	NA	NA	NA	NA	NA	NA
ENSG00000095209.7	TMEM38B	NA	NA	NA	NA	-1.10555	2.42765e-23
ENSG00000095303.10	PTGS1	NA	NA	NA	NA	NA	NA
ENSG00000095370.15	SH2D3C	NA	NA	NA	NA	NA	NA
ENSG00000095596.7	CYP26A1	NA	NA	NA	NA	-1.87582	4.72538e-109
ENSG00000095713.9	CRTAC1	NA	NA	NA	NA	NA	NA
ENSG00000095932.5	C19orf77	NA	NA	NA	NA	NA	NA
ENSG00000096060.10	FKBP5	NA	NA	NA	NA	NA	NA
ENSG00000096088.12	PGC	NA	NA	NA	NA	NA	NA
ENSG00000096968.8	JAK2	NA	NA	NA	NA	1.22215	3.12679e-30
ENSG00000099250.13	NRP1	NA	NA	NA	NA	-2.81977	1.48067e-99
ENSG00000099260.6	PALMD	NA	NA	NA	NA	NA	NA
ENSG00000099822.2	HCN2	NA	NA	NA	NA	NA	NA
ENSG00000099957.12	P2RX6	NA	NA	NA	NA	-1.8472	0.00080324
ENSG00000099984.6	GSTT2	NA	NA	NA	NA	NA	NA
ENSG00000099994.10	SUSD2	NA	NA	NA	NA	NA	NA
ENSG00000100003.13	SEC14L2	NA	NA	NA	NA	-2.09703	2.03118e-16
ENSG00000100024.10	UPB1	NA	NA	NA	NA	1.47589	0.000308645
ENSG00000100033.12	PRODH	NA	NA	NA	NA	3.00899	2.35192e-271
ENSG00000100079.5	LGALS2	NA	NA	NA	NA	NA	NA
ENSG00000100095.14	SEZ6L	NA	NA	NA	NA	NA	NA
ENSG00000100122.5	CRYBB1	NA	NA	NA	NA	NA	NA
ENSG00000100146.12	SOX10	NA	NA	NA	NA	NA	NA
ENSG00000100218.7	RTDR1	NA	NA	NA	NA	NA	NA
ENSG00000100276.9	RASL10A	NA	NA	NA	NA	NA	NA
ENSG00000100292.12	HMOX1	NA	NA	NA	NA	NA	NA
ENSG00000100302.6	RASD2	NA	NA	NA	NA	1.34728	0.00187491
ENSG00000100314.3	CABP7	NA	NA	NA	NA	-5.72374	1.42583e-16
ENSG00000100373.5	UPK3A	NA	NA	NA	NA	NA	NA
ENSG00000100433.11	KCNK10	NA	NA	NA	NA	-1.28057	0.000865873
ENSG00000100473.11	COCH	NA	NA	NA	NA	NA	NA
ENSG00000100503.19	NIN	NA	NA	NA	NA	NA	NA
ENSG00000100558.4	PLEK2	NA	NA	NA	NA	NA	NA
ENSG00000100583.4	SAMD15	NA	NA	NA	NA	-1.35859	7.98226e-13
ENSG00000100678.14	SLC8A3	NA	NA	NA	NA	3.06473	0.00297842
ENSG00000100739.6	BDKRB1	NA	NA	NA	NA	2.93327	0.00087543
ENSG00000100767.11	PAPLN	NA	NA	NA	NA	NA	NA
ENSG00000100867.10	DHRS2	NA	NA	NA	NA	NA	NA
ENSG00000100985.7	MMP9	NA	NA	NA	NA	NA	NA
ENSG00000101076.12	HNF4A	NA	NA	NA	NA	NA	NA
ENSG00000101096.15	NFATC2	NA	NA	NA	NA	1.14637	1.76914e-09
ENSG00000101144.8	BMP7	NA	NA	NA	NA	-1.09211	8.96814e-44
ENSG00000101194.13	SLC17A9	NA	NA	NA	NA	NA	NA
ENSG00000101265.11	RASSF2	NA	NA	NA	NA	1.40138	2.14732e-47
ENSG00000101335.5	MYL9	NA	NA	NA	NA	NA	NA
ENSG00000101347.7	SAMHD1	NA	NA	NA	NA	1.07675	4.99325e-19
ENSG00000101384.7	JAG1	NA	NA	NA	NA	2.51743	3.84508e-264
ENSG00000101441.4	CST4	NA	NA	NA	NA	NA	NA
ENSG00000101445.5	PPP1R16B	NA	NA	NA	NA	1.01955	2.77999e-20
ENSG00000101463.5	SYNDIG1	NA	NA	NA	NA	-1.02382	2.92798e-09
ENSG00000101489.14	CELF4	NA	NA	NA	NA	NA	NA
ENSG00000101977.15	MCF2	NA	NA	NA	NA	1.32179	5.6653e-12
ENSG00000102001.8	CACNA1F	NA	NA	NA	NA	NA	NA
ENSG00000102003.6	SYP	NA	NA	NA	NA	NA	NA
ENSG00000102007.6	PLP2	NA	NA	NA	NA	NA	NA
ENSG00000102034.12	ELF4	NA	NA	NA	NA	NA	NA
ENSG00000102048.11	ASB9	NA	NA	NA	NA	NA	NA
ENSG00000102096.9	PIM2	NA	NA	NA	NA	1.31411	3.9529e-40
ENSG00000102195.7	GPR50	NA	NA	NA	NA	5.44813	2.28781e-95
ENSG00000102287.12	GABRE	NA	NA	NA	NA	NA	NA
ENSG00000102290.17	PCDH11X	NA	NA	NA	NA	NA	NA
ENSG00000102312.16	PORCN	NA	NA	NA	NA	NA	NA
ENSG00000102452.11	NALCN	NA	NA	NA	NA	NA	NA
ENSG00000102466.11	FGF14	NA	NA	NA	NA	1.9291	3.29206e-15
ENSG00000102539.4	MLNR	NA	NA	NA	NA	2.5545	5.29419e-11
ENSG00000102554.9	KLF5	NA	NA	NA	NA	-1.2091	2.04227e-42
ENSG00000102575.6	ACP5	NA	NA	NA	NA	NA	NA
ENSG00000102755.6	FLT1	NA	NA	NA	NA	NA	NA
ENSG00000102760.12	RGCC	NA	NA	NA	NA	NA	NA
ENSG00000102886.10	GDPD3	NA	NA	NA	NA	1.07132	1.87515e-05
ENSG00000102904.10	TSNAXIP1	NA	NA	NA	NA	-1.17938	4.52821e-05
ENSG00000102924.7	CBLN1	NA	NA	NA	NA	1.02256	5.79179e-05
ENSG00000103034.10	NDRG4	NA	NA	NA	NA	-1.35648	5.33521e-46
ENSG00000103044.6	HAS3	NA	NA	NA	NA	NA	NA
ENSG00000103150.4	MLYCD	NA	NA	NA	NA	1.02777	1.24729e-19
ENSG00000103175.6	WFDC1	NA	NA	NA	NA	NA	NA
ENSG00000103260.4	METRN	NA	NA	NA	NA	NA	NA
ENSG00000103316.6	CRYM	NA	NA	NA	NA	1.14319	1.99248e-27
ENSG00000103546.14	SLC6A2	NA	NA	NA	NA	NA	NA
ENSG00000103599.15	IQCH	NA	NA	NA	NA	NA	NA
ENSG00000103740.5	ACSBG1	NA	NA	NA	NA	NA	NA
ENSG00000103811.11	CTSH	NA	NA	NA	NA	-1.02594	5.44229e-29
ENSG00000104044.11	OCA2	NA	NA	NA	NA	1.20971	1.26965e-06
ENSG00000104059.4	FAM189A1	NA	NA	NA	NA	-1.25613	1.35558e-26
ENSG00000104112.4	SCG3	NA	NA	NA	NA	NA	NA
ENSG00000104218.9	CSPP1	NA	NA	NA	NA	NA	NA
ENSG00000104267.5	CA2	NA	NA	NA	NA	1.05247	6.30651e-41
ENSG00000104313.13	EYA1	NA	NA	NA	NA	NA	NA
ENSG00000104321.6	TRPA1	NA	NA	NA	NA	NA	NA
ENSG00000104327.3	CALB1	NA	NA	NA	NA	NA	NA
ENSG00000104331.4	IMPAD1	NA	NA	NA	NA	NA	NA
ENSG00000104368.13	PLAT	NA	NA	NA	NA	NA	NA
ENSG00000104371.4	DKK4	NA	NA	NA	NA	NA	NA
ENSG00000104419.10	NDRG1	NA	NA	NA	NA	NA	NA
ENSG00000104435.9	STMN2	NA	NA	NA	NA	NA	NA
ENSG00000104689.5	TNFRSF10A	NA	NA	NA	NA	NA	NA
ENSG00000104722.9	NEFM	NA	NA	NA	NA	NA	NA
ENSG00000104725.9	NEFL	NA	NA	NA	NA	NA	NA
ENSG00000104808.3	DHDH	NA	NA	NA	NA	NA	NA
ENSG00000104833.6	TUBB4A	NA	NA	NA	NA	NA	NA
ENSG00000104879.4	CKM	NA	NA	NA	NA	-1.60576	3.57235e-07
ENSG00000104888.5	SLC17A7	NA	NA	NA	NA	1.04113	0.0068037
ENSG00000104903.4	LYL1	NA	NA	NA	NA	NA	NA
ENSG00000104953.14	TLE6	NA	NA	NA	NA	NA	NA
ENSG00000104967.6	NOVA2	NA	NA	NA	NA	1.15236	6.77946e-12
ENSG00000105251.6	SHD	NA	NA	NA	NA	NA	NA
ENSG00000105357.11	MYH14	NA	NA	NA	NA	1.02497	1.13629e-29
ENSG00000105371.8	ICAM4	NA	NA	NA	NA	NA	NA
ENSG00000105409.11	ATP1A3	NA	NA	NA	NA	NA	NA
ENSG00000105499.9	PLA2G4C	NA	NA	NA	NA	NA	NA
ENSG00000105610.4	KLF1	NA	NA	NA	NA	NA	NA
ENSG00000105679.4	GAPDHS	NA	NA	NA	NA	NA	NA
ENSG00000105707.9	HPN	NA	NA	NA	NA	NA	NA
ENSG00000105784.11	RUNDC3B	NA	NA	NA	NA	NA	NA
ENSG00000105808.13	RASA4	NA	NA	NA	NA	NA	NA
ENSG00000105810.5	CDK6	NA	NA	NA	NA	NA	NA
ENSG00000105825.7	TFPI2	NA	NA	NA	NA	NA	NA
ENSG00000105855.5	ITGB8	NA	NA	NA	NA	NA	NA
ENSG00000105877.13	DNAH11	NA	NA	NA	NA	NA	NA
ENSG00000105971.10	CAV2	NA	NA	NA	NA	NA	NA
ENSG00000105974.7	CAV1	NA	NA	NA	NA	NA	NA
ENSG00000106003.8	LFNG	NA	NA	NA	NA	NA	NA
ENSG00000106018.9	VIPR2	NA	NA	NA	NA	-1.26067	0.00566761
ENSG00000106038.8	EVX1	NA	NA	NA	NA	-4.37524	8.2837e-85
ENSG00000106069.16	CHN2	NA	NA	NA	NA	1.15076	4.98795e-15
ENSG00000106077.14	ABHD11	NA	NA	NA	NA	NA	NA
ENSG00000106128.14	GHRHR	NA	NA	NA	NA	NA	NA
ENSG00000106258.9	CYP3A5	NA	NA	NA	NA	NA	NA
ENSG00000106278.7	PTPRZ1	NA	NA	NA	NA	NA	NA
ENSG00000106299.7	WASL	NA	NA	NA	NA	1.45568	3.7536e-65
ENSG00000106336.8	FBXO24	NA	NA	NA	NA	NA	NA
ENSG00000106341.6	PPP1R17	NA	NA	NA	NA	NA	NA
ENSG00000106366.7	SERPINE1	NA	NA	NA	NA	NA	NA
ENSG00000106384.6	MOGAT3	NA	NA	NA	NA	NA	NA
ENSG00000106538.5	RARRES2	NA	NA	NA	NA	1.07255	3.256e-18
ENSG00000106571.8	GLI3	NA	NA	NA	NA	NA	NA
ENSG00000106631.4	MYL7	NA	NA	NA	NA	NA	NA
ENSG00000106688.7	SLC1A1	NA	NA	NA	NA	NA	NA
ENSG00000106714.13	CNTNAP3	NA	NA	NA	NA	NA	NA
ENSG00000106804.6	C5	NA	NA	NA	NA	-2.83429	2.50512e-165
ENSG00000106823.8	ECM2	NA	NA	NA	NA	-1.62927	1.96777e-07
ENSG00000106852.11	LHX6	NA	NA	NA	NA	NA	NA
ENSG00000106927.7	AMBP	NA	NA	NA	NA	NA	NA
ENSG00000107249.17	GLIS3	NA	NA	NA	NA	2.77254	3.75059e-43
ENSG00000107282.5	APBA1	NA	NA	NA	NA	2.79482	1.33394e-14
ENSG00000107317.7	PTGDS	NA	NA	NA	NA	-1.47106	3.49983e-14
ENSG00000107338.8	SHB	NA	NA	NA	NA	NA	NA
ENSG00000107485.11	GATA3	NA	NA	NA	NA	-2.51563	2.0431e-121
ENSG00000107551.16	RASSF4	NA	NA	NA	NA	NA	NA
ENSG00000107611.10	CUBN	NA	NA	NA	NA	-1.32432	1.24787e-05
ENSG00000107736.15	CDH23	NA	NA	NA	NA	-1.4937	7.80705e-19
ENSG00000107742.8	SPOCK2	NA	NA	NA	NA	NA	NA
ENSG00000107796.8	ACTA2	NA	NA	NA	NA	NA	NA
ENSG00000107819.9	SFXN3	NA	NA	NA	NA	NA	NA
ENSG00000107831.8	FGF8	NA	NA	NA	NA	NA	NA
ENSG00000107854.5	TNKS2	NA	NA	NA	NA	1.10179	4.96719e-51
ENSG00000107984.5	DKK1	NA	NA	-1.18272	0.00115035	-1.3424	8.42259e-28
ENSG00000108018.11	SORCS1	NA	NA	NA	NA	NA	NA
ENSG00000108231.7	LGI1	NA	NA	NA	NA	-1.77869	5.62806e-06
ENSG00000108370.11	RGS9	NA	NA	NA	NA	NA	NA
ENSG00000108379.5	WNT3	NA	NA	NA	NA	NA	NA
ENSG00000108387.10	2004-09-01	NA	NA	NA	NA	NA	NA
ENSG00000108551.4	RASD1	NA	NA	NA	NA	1.86076	7.08885e-15
ENSG00000108576.5	SLC6A4	NA	NA	NA	NA	-3.80264	7.00934e-15
ENSG00000108691.5	CCL2	NA	NA	NA	NA	1.77458	1.82337e-61
ENSG00000108753.8	HNF1B	NA	NA	NA	NA	NA	NA
ENSG00000108823.11	SGCA	NA	NA	NA	NA	NA	NA
ENSG00000108830.7	RND2	NA	NA	NA	NA	1.31227	9.55383e-71
ENSG00000108950.7	FAM20A	NA	NA	NA	NA	1.54169	9.46969e-55
ENSG00000109072.9	VTN	NA	NA	NA	NA	NA	NA
ENSG00000109255.7	NMU	NA	NA	NA	NA	1.41702	5.29589e-30
ENSG00000109339.14	MAPK10	NA	NA	NA	NA	-1.7004	1.43082e-56
ENSG00000109452.8	INPP4B	NA	NA	NA	NA	1.43045	5.89308e-14
ENSG00000109472.9	CPE	NA	NA	NA	NA	-1.48088	1.32623e-113
ENSG00000109610.5	SOD3	NA	NA	NA	NA	-1.95677	7.24876e-10
ENSG00000109625.14	CPZ	NA	NA	NA	NA	NA	NA
ENSG00000109654.10	TRIM2	NA	NA	NA	NA	NA	NA
ENSG00000109667.7	SLC2A9	NA	NA	NA	NA	NA	NA
ENSG00000109846.3	CRYAB	NA	NA	NA	NA	NA	NA
ENSG00000109906.9	ZBTB16	NA	NA	NA	NA	-1.46258	2.95281e-05
ENSG00000109944.6	C11orf63	NA	NA	NA	NA	2.22439	2.2269e-46
ENSG00000110002.11	VWA5A	NA	NA	NA	NA	NA	NA
ENSG00000110080.14	ST3GAL4	NA	NA	NA	NA	NA	NA
ENSG00000110090.8	CPT1A	NA	NA	NA	NA	NA	NA
ENSG00000110169.6	HPX	NA	NA	NA	NA	NA	NA
ENSG00000110244.5	APOA4	NA	NA	NA	NA	NA	NA
ENSG00000110328.5	GALNT18	NA	NA	NA	NA	1.0857	4.45988e-32
ENSG00000110436.7	SLC1A2	NA	NA	NA	NA	-2.63442	1.98383e-131
ENSG00000110697.8	PITPNM1	NA	NA	NA	NA	NA	NA
ENSG00000110723.7	EXPH5	NA	NA	NA	NA	NA	NA
ENSG00000110777.7	POU2AF1	NA	NA	NA	NA	-1.04029	0.00728835
ENSG00000110786.13	PTPN5	NA	NA	NA	NA	1.12409	2.43166e-43
ENSG00000110799.9	VWF	NA	NA	NA	NA	-1.2778	7.47921e-59
ENSG00000110881.7	ASIC1	NA	NA	NA	NA	-1.06249	5.27726e-14
ENSG00000110931.14	CAMKK2	NA	NA	NA	NA	NA	NA
ENSG00000110975.4	SYT10	NA	NA	NA	NA	-1.68071	1.52498e-34
ENSG00000111087.5	GLI1	NA	NA	NA	NA	NA	NA
ENSG00000111186.8	WNT5B	NA	NA	NA	NA	NA	NA
ENSG00000111432.4	FZD10	NA	NA	NA	NA	NA	NA
ENSG00000111452.8	GPR133	NA	NA	NA	NA	-1.3958	1.33127e-05
ENSG00000111671.5	SPSB2	NA	NA	NA	NA	1.73172	1.33223e-23
ENSG00000111674.4	ENO2	NA	NA	NA	NA	1.50262	7.32243e-70
ENSG00000111704.6	NANOG	NA	NA	NA	NA	1.10323	8.52098e-30
ENSG00000111713.2	GYS2	NA	NA	NA	NA	3.81265	4.00083e-06
ENSG00000111728.6	ST8SIA1	NA	NA	NA	NA	-1.23569	1.35035e-08
ENSG00000111799.16	COL12A1	NA	NA	NA	NA	2.95877	1.53547e-89
ENSG00000111816.6	FRK	NA	NA	NA	NA	-1.75799	4.73466e-30
ENSG00000111834.8	RSPH4A	NA	NA	NA	NA	-1.23012	2.91965e-06
ENSG00000111859.12	NEDD9	NA	NA	NA	NA	1.21008	2.67811e-16
ENSG00000111863.8	ADTRP	NA	NA	NA	NA	NA	NA
ENSG00000111885.5	MAN1A1	NA	NA	NA	NA	-1.18706	1.54972e-48
ENSG00000111913.11	FAM65B	NA	NA	NA	NA	NA	NA
ENSG00000111961.12	SASH1	NA	NA	NA	NA	1.50238	2.2032e-48
ENSG00000112041.8	TULP1	NA	NA	NA	NA	NA	NA
ENSG00000112175.6	BMP5	NA	NA	NA	NA	-2.4784	1.32047e-17
ENSG00000112208.10	BAG2	NA	NA	NA	NA	NA	NA
ENSG00000112394.12	SLC16A10	NA	NA	NA	NA	1.5499	5.36564e-55
ENSG00000112414.10	GPR126	NA	NA	NA	NA	NA	NA
ENSG00000112494.5	UNC93A	NA	NA	NA	NA	-2.63096	2.59778e-08
ENSG00000112499.8	SLC22A2	NA	NA	NA	NA	1.05801	0.0101169
ENSG00000112541.9	PDE10A	NA	NA	NA	NA	1.05054	4.77896e-34
ENSG00000112561.13	TFEB	NA	NA	NA	NA	NA	NA
ENSG00000112562.14	SMOC2	NA	NA	NA	NA	NA	NA
ENSG00000112599.8	GUCA1B	NA	NA	NA	NA	NA	NA
ENSG00000112769.14	LAMA4	NA	NA	NA	NA	1.4009	2.56059e-29
ENSG00000112773.11	FAM46A	NA	NA	NA	NA	NA	NA
ENSG00000112936.14	C7	NA	NA	NA	NA	-3.26333	8.14274e-12
ENSG00000112964.9	GHR	NA	NA	NA	NA	NA	NA
ENSG00000113083.8	LOX	NA	NA	NA	NA	-1.80987	2.36477e-46
ENSG00000113100.5	CDH9	NA	NA	NA	NA	NA	NA
ENSG00000113140.6	SPARC	NA	NA	NA	NA	1.28802	4.07103e-97
ENSG00000113249.8	HAVCR1	NA	NA	NA	NA	NA	NA
ENSG00000113296.10	THBS4	NA	NA	NA	NA	NA	NA
ENSG00000113319.7	RASGRF2	NA	NA	NA	NA	-1.08512	7.3964e-15
ENSG00000113356.6	POLR3G	NA	NA	NA	NA	NA	NA
ENSG00000113361.8	CDH6	NA	NA	NA	NA	1.5153	3.27503e-12
ENSG00000113389.11	NPR3	NA	NA	NA	NA	NA	NA
ENSG00000113494.12	PRLR	NA	NA	NA	NA	1.23759	4.25204e-52
ENSG00000113578.13	FGF1	NA	NA	NA	NA	NA	NA
ENSG00000113580.10	NR3C1	NA	NA	NA	NA	NA	NA
ENSG00000113594.5	LIFR	NA	NA	NA	NA	NA	NA
ENSG00000113739.6	STC2	NA	NA	NA	NA	NA	NA
ENSG00000113763.6	UNC5A	NA	NA	NA	NA	-1.45663	7.55409e-07
ENSG00000113805.8	CNTN3	NA	NA	NA	NA	NA	NA
ENSG00000113916.13	BCL6	NA	NA	NA	NA	NA	NA
ENSG00000113924.7	HGD	NA	NA	NA	NA	1.82272	0.00953943
ENSG00000113946.3	CLDN16	NA	NA	NA	NA	-1.49781	0.000128907
ENSG00000114251.9	WNT5A	NA	NA	NA	NA	NA	NA
ENSG00000114279.9	FGF12	NA	NA	NA	NA	-1.17198	1.5803e-44
ENSG00000114378.12	HYAL1	NA	NA	NA	NA	NA	NA
ENSG00000114450.5	GNB4	NA	NA	NA	NA	NA	NA
ENSG00000114529.8	C3orf52	NA	NA	NA	NA	NA	NA
ENSG00000114541.10	FRMD4B	NA	NA	NA	NA	NA	NA
ENSG00000114638.3	UPK1B	NA	NA	NA	NA	-1.65273	2.99705e-15
ENSG00000114646.5	CSPG5	NA	NA	NA	NA	NA	NA
ENSG00000114648.7	KLHL18	NA	NA	NA	NA	1.55975	8.4773e-66
ENSG00000114656.6	KIAA1257	NA	NA	NA	NA	NA	NA
ENSG00000114698.10	PLSCR4	NA	NA	NA	NA	NA	NA
ENSG00000114757.14	PEX5L	NA	NA	NA	NA	NA	NA
ENSG00000114854.3	TNNC1	NA	NA	NA	NA	1.03102	8.33054e-31
ENSG00000115085.9	ZAP70	NA	NA	NA	NA	-2.93981	1.46836e-13
ENSG00000115112.7	TFCP2L1	NA	NA	NA	NA	NA	NA
ENSG00000115138.6	POMC	NA	NA	NA	NA	2.37543	1.17845e-118
ENSG00000115155.12	OTOF	NA	NA	NA	NA	NA	NA
ENSG00000115183.9	TANC1	NA	NA	NA	NA	NA	NA
ENSG00000115226.5	FNDC4	NA	NA	NA	NA	1.84174	3.16639e-108
ENSG00000115290.5	GRB14	NA	NA	NA	NA	-1.04957	1.80132e-19
ENSG00000115353.6	TACR1	NA	NA	NA	NA	-2.01625	0.000228119
ENSG00000115414.14	FN1	NA	NA	NA	NA	NA	NA
ENSG00000115461.4	IGFBP5	NA	NA	NA	NA	NA	NA
ENSG00000115468.7	EFHD1	NA	NA	NA	NA	NA	NA
ENSG00000115474.6	KCNJ13	NA	NA	NA	NA	NA	NA
ENSG00000115507.5	OTX1	NA	NA	NA	NA	-1.31348	3.92504e-16
ENSG00000115525.12	ST3GAL5	NA	NA	NA	NA	-1.0261	3.47394e-14
ENSG00000115594.7	IL1R1	NA	NA	NA	NA	-1.05313	2.91305e-07
ENSG00000115602.12	IL1RL1	NA	NA	NA	NA	2.97972	3.76523e-51
ENSG00000115604.6	IL18R1	NA	NA	NA	NA	3.01098	8.07921e-36
ENSG00000115648.9	MLPH	NA	NA	NA	NA	NA	NA
ENSG00000115718.13	PROC	NA	NA	NA	NA	NA	NA
ENSG00000115816.9	CEBPZ	NA	NA	NA	NA	NA	NA
ENSG00000115840.9	SLC25A12	NA	NA	NA	NA	1.08025	1.12631e-16
ENSG00000115844.6	DLX2	NA	NA	NA	NA	6.73197	5.69727e-13
ENSG00000115902.6	SLC1A4	NA	NA	NA	NA	NA	NA
ENSG00000115919.10	KYNU	NA	NA	NA	NA	-3.99769	8.53022e-91
ENSG00000115963.9	RND3	NA	NA	NA	NA	NA	NA
ENSG00000115993.7	TRAK2	NA	NA	NA	NA	NA	NA
ENSG00000116016.9	EPAS1	NA	NA	NA	NA	NA	NA
ENSG00000116039.7	ATP6V1B1	NA	NA	NA	NA	-1.32196	0.0357398
ENSG00000116147.12	TNR	NA	NA	NA	NA	-3.2776	1.38001e-83
ENSG00000116285.8	ERRFI1	NA	NA	NA	NA	NA	NA
ENSG00000116299.12	KIAA1324	NA	NA	NA	NA	NA	NA
ENSG00000116667.8	C1orf21	NA	NA	NA	NA	NA	NA
ENSG00000116675.11	DNAJC6	NA	NA	NA	NA	1.07571	1.05656e-28
ENSG00000116729.9	WLS	NA	NA	NA	NA	-1.54575	7.82239e-57
ENSG00000116741.6	RGS2	NA	NA	NA	NA	NA	NA
ENSG00000116771.5	AGMAT	NA	NA	NA	NA	NA	NA
ENSG00000116819.6	TFAP2E	NA	NA	NA	NA	1.03268	0.0209203
ENSG00000116962.10	NID1	NA	NA	NA	NA	NA	NA
ENSG00000116991.6	SIPA1L2	NA	NA	NA	NA	NA	NA
ENSG00000117013.10	KCNQ4	NA	NA	NA	NA	NA	NA
ENSG00000117091.5	CD48	NA	NA	NA	NA	NA	NA
ENSG00000117154.7	IGSF21	NA	NA	NA	NA	NA	NA
ENSG00000117289.7	TXNIP	NA	NA	NA	NA	-1.1435	5.01936e-20
ENSG00000117318.8	ID3	NA	NA	NA	NA	-1.13535	4.2207e-55
ENSG00000117322.12	CR2	NA	NA	NA	NA	NA	NA
ENSG00000117500.8	TMED5	NA	NA	NA	NA	1.6437	5.73393e-53
ENSG00000117525.9	F3	NA	NA	NA	NA	-1.05784	1.45422e-19
ENSG00000117598.7	LPPR5	NA	NA	NA	NA	NA	NA
ENSG00000117600.8	LPPR4	NA	NA	NA	NA	NA	NA
ENSG00000117643.10	MAN1C1	NA	NA	NA	NA	NA	NA
ENSG00000117834.8	SLC5A9	NA	NA	NA	NA	-2.139	4.46776e-47
ENSG00000117862.7	TXNDC12	NA	NA	NA	NA	1.3395	3.84009e-56
ENSG00000118137.5	APOA1	NA	NA	NA	NA	NA	NA
ENSG00000118160.9	SLC8A2	NA	NA	NA	NA	NA	NA
ENSG00000118193.7	KIF14	NA	NA	NA	NA	NA	NA
ENSG00000118194.14	TNNT2	NA	NA	NA	NA	NA	NA
ENSG00000118245.2	TNP1	NA	NA	NA	NA	NA	NA
ENSG00000118257.12	NRP2	NA	NA	NA	NA	1.04066	4.0666e-05
ENSG00000118263.10	KLF7	NA	NA	NA	NA	1.47112	5.51052e-85
ENSG00000118271.5	TTR	NA	NA	NA	NA	NA	NA
ENSG00000118307.14	CASC1	NA	NA	NA	NA	-1.33088	0.000827096
ENSG00000118322.8	ATP10B	NA	NA	NA	NA	NA	NA
ENSG00000118407.10	FILIP1	NA	NA	NA	NA	NA	NA
ENSG00000118432.11	CNR1	NA	NA	NA	NA	NA	NA
ENSG00000118515.7	SGK1	NA	NA	NA	NA	NA	NA
ENSG00000118523.5	CTGF	NA	NA	NA	NA	NA	NA
ENSG00000118557.11	PMFBP1	NA	NA	NA	NA	-1.09237	1.75631e-06
ENSG00000118777.6	ABCG2	NA	NA	NA	NA	NA	NA
ENSG00000118785.9	SPP1	NA	NA	NA	NA	NA	NA
ENSG00000118922.12	KLF12	NA	NA	NA	NA	NA	NA
ENSG00000118971.3	CCND2	NA	NA	NA	NA	NA	NA
ENSG00000119138.3	KLF9	NA	NA	NA	NA	NA	NA
ENSG00000119147.5	C2orf40	NA	NA	NA	NA	NA	NA
ENSG00000119630.9	PGF	NA	NA	NA	NA	-1.57378	1.07958e-18
ENSG00000119686.5	FLVCR2	NA	NA	NA	NA	NA	NA
ENSG00000119699.3	TGFB3	NA	NA	NA	NA	-1.12158	3.20366e-06
ENSG00000119715.10	ESRRB	NA	NA	NA	NA	-1.35679	2.63744e-05
ENSG00000119771.10	KLHL29	NA	NA	NA	NA	1.22866	3.45239e-08
ENSG00000119866.16	BCL11A	NA	NA	NA	NA	NA	NA
ENSG00000119899.11	SLC17A5	NA	NA	NA	NA	1.15542	4.51939e-33
ENSG00000119919.9	NKX2-3	NA	NA	NA	NA	-6.47434	2.00839e-05
ENSG00000119946.9	CNNM1	NA	NA	NA	NA	1.19438	3.75713e-24
ENSG00000120051.10	CCDC147	NA	NA	NA	NA	NA	NA
ENSG00000120054.7	CPN1	NA	NA	NA	NA	1.38289	3.56887e-05
ENSG00000120055.5	C10orf95	NA	NA	NA	NA	NA	NA
ENSG00000120057.4	SFRP5	NA	NA	NA	NA	-2.01743	1.02781e-26
ENSG00000120088.10	CRHR1	NA	NA	NA	NA	NA	NA
ENSG00000120149.7	MSX2	NA	NA	NA	NA	-1.06941	4.65837e-12
ENSG00000120156.16	TEK	NA	NA	NA	NA	NA	NA
ENSG00000120217.9	CD274	NA	NA	NA	NA	-1.69012	0.0100669
ENSG00000120256.5	LRP11	NA	NA	NA	NA	NA	NA
ENSG00000120262.8	CCDC170	NA	NA	NA	NA	NA	NA
ENSG00000120278.10	PLEKHG1	NA	NA	NA	NA	2.01224	9.34581e-32
ENSG00000120279.6	MYCT1	NA	NA	NA	NA	-2.92165	2.81647e-18
ENSG00000120457.7	KCNJ5	NA	NA	NA	NA	-1.4987	0.00504368
ENSG00000120549.11	KIAA1217	NA	NA	NA	NA	NA	NA
ENSG00000120645.7	IQSEC3	NA	NA	NA	NA	NA	NA
ENSG00000120659.10	TNFSF11	NA	NA	NA	NA	NA	NA
ENSG00000120664.6	SPG20OS	NA	NA	NA	NA	NA	NA
ENSG00000120675.4	DNAJC15	NA	NA	NA	NA	NA	NA
ENSG00000120693.9	SMAD9	NA	NA	NA	NA	NA	NA
ENSG00000120738.7	EGR1	NA	NA	NA	NA	1.68762	1.33084e-15
ENSG00000120885.15	CLU	NA	NA	NA	NA	NA	NA
ENSG00000120899.13	PTK2B	NA	NA	NA	NA	NA	NA
ENSG00000120949.10	TNFRSF8	NA	NA	NA	NA	NA	NA
ENSG00000120992.13	LYPLA1	NA	NA	NA	NA	1.05214	3.79942e-42
ENSG00000121057.8	AKAP1	NA	NA	NA	NA	NA	NA
ENSG00000121207.7	LRAT	NA	NA	NA	NA	NA	NA
ENSG00000121236.15	TRIM6	NA	NA	NA	NA	NA	NA
ENSG00000121297.6	TSHZ3	NA	NA	NA	NA	NA	NA
ENSG00000121361.3	KCNJ8	NA	NA	NA	NA	NA	NA
ENSG00000121380.8	BCL2L14	NA	NA	NA	NA	NA	NA
ENSG00000121440.10	PDZRN3	NA	NA	NA	NA	NA	NA
ENSG00000121454.4	LHX4	NA	NA	NA	NA	NA	NA
ENSG00000121594.7	CD80	NA	NA	NA	NA	-1.79721	1.34918e-13
ENSG00000121690.5	DEPDC7	NA	NA	NA	NA	1.06331	2.60561e-24
ENSG00000121769.3	FABP3	NA	NA	NA	NA	NA	NA
ENSG00000121871.3	SLITRK3	NA	NA	NA	NA	-1.53753	0.00500481
ENSG00000121898.8	CPXM2	NA	NA	NA	NA	NA	NA
ENSG00000121900.14	TMEM54	NA	NA	NA	NA	NA	NA
ENSG00000121957.8	GPSM2	NA	NA	NA	NA	NA	NA
ENSG00000121966.6	CXCR4	NA	NA	NA	NA	-2.20315	2.09215e-203
ENSG00000122145.10	TBX22	NA	NA	NA	NA	1.35326	2.67977e-10
ENSG00000122176.10	FMOD	NA	NA	NA	NA	-6.61738	9.8613e-09
ENSG00000122194.14	PLG	NA	NA	NA	NA	NA	NA
ENSG00000122254.6	HS3ST2	NA	NA	NA	NA	NA	NA
ENSG00000122420.5	PTGFR	NA	NA	NA	NA	1.40714	3.65989e-06
ENSG00000122585.3	NPY	NA	NA	NA	NA	NA	NA
ENSG00000122694.11	GLIPR2	NA	NA	NA	NA	1.34248	8.03586e-71
ENSG00000122711.4	SPINK4	NA	NA	NA	NA	-2.49918	0.0222976
ENSG00000122733.11	KIAA1045	NA	NA	NA	NA	NA	NA
ENSG00000122735.11	DNAI1	NA	NA	NA	NA	NA	NA
ENSG00000122786.15	CALD1	NA	NA	NA	NA	NA	NA
ENSG00000122787.10	AKR1D1	NA	NA	NA	NA	NA	NA
ENSG00000122824.6	NUDT10	NA	NA	NA	NA	1.15393	2.83092e-12
ENSG00000122861.11	PLAU	NA	NA	NA	NA	NA	NA
ENSG00000122863.5	CHST3	NA	NA	NA	NA	NA	NA
ENSG00000122877.9	EGR2	NA	NA	NA	NA	NA	NA
ENSG00000122884.8	P4HA1	NA	NA	NA	NA	NA	NA
ENSG00000122912.10	SLC25A16	NA	NA	NA	NA	2.08118	2.66307e-90
ENSG00000123095.5	BHLHE41	NA	NA	NA	NA	NA	NA
ENSG00000123096.7	SSPN	NA	NA	NA	NA	NA	NA
ENSG00000123119.7	NECAB1	NA	NA	1.07035	4.93327e-08	3.56436	6.22215e-252
ENSG00000123243.10	ITIH5	NA	NA	NA	NA	2.66147	8.21142e-126
ENSG00000123338.8	NCKAP1L	NA	NA	NA	NA	NA	NA
ENSG00000123342.11	MMP19	NA	NA	NA	NA	NA	NA
ENSG00000123453.12	SARDH	NA	NA	NA	NA	NA	NA
ENSG00000123572.12	NRK	NA	NA	NA	NA	NA	NA
ENSG00000123685.4	BATF3	NA	NA	NA	NA	1.71892	5.24285e-08
ENSG00000123689.5	G0S2	NA	NA	NA	NA	NA	NA
ENSG00000123810.3	B9D2	NA	NA	NA	NA	NA	NA
ENSG00000124019.9	FAM124B	NA	NA	1.33518	1.6307e-08	1.087	0.00163612
ENSG00000124126.9	PREX1	NA	NA	NA	NA	NA	NA
ENSG00000124233.10	SEMG1	NA	NA	NA	NA	NA	NA
ENSG00000124251.6	TP53TG5	NA	NA	NA	NA	NA	NA
ENSG00000124406.12	ATP8A1	NA	NA	NA	NA	2.2129	1.34223e-164
ENSG00000124491.11	F13A1	NA	NA	NA	NA	NA	NA
ENSG00000124568.6	SLC17A1	NA	NA	NA	NA	NA	NA
ENSG00000124635.7	HIST1H2BJ	NA	NA	NA	NA	NA	NA
ENSG00000124749.12	COL21A1	NA	NA	NA	NA	NA	NA
ENSG00000124762.9	CDKN1A	NA	NA	NA	NA	NA	NA
ENSG00000124780.9	KCNK17	NA	NA	NA	NA	1.61309	0.0425942
ENSG00000124785.4	NRN1	NA	NA	NA	NA	-1.60102	0.00218392
ENSG00000124875.5	CXCL6	NA	NA	NA	NA	NA	NA
ENSG00000124882.3	EREG	NA	NA	NA	NA	4.84286	1.54972e-48
ENSG00000125046.10	SSUH2	NA	NA	NA	NA	1.35077	2.48234e-15
ENSG00000125122.10	LRRC29	NA	NA	NA	NA	NA	NA
ENSG00000125144.9	MT1G	NA	NA	NA	NA	NA	NA
ENSG00000125148.6	MT2A	NA	NA	NA	NA	1.72376	0.000254459
ENSG00000125257.9	ABCC4	NA	NA	NA	NA	-2.83309	2.17736e-274
ENSG00000125266.6	EFNB2	NA	NA	NA	NA	2.62179	1.46028e-118
ENSG00000125285.4	SOX21	NA	NA	NA	NA	NA	NA
ENSG00000125398.5	SOX9	NA	NA	NA	NA	1.15855	1.31993e-07
ENSG00000125414.14	MYH2	NA	NA	NA	NA	NA	NA
ENSG00000125462.12	C1orf61	NA	NA	NA	NA	NA	NA
ENSG00000125510.11	OPRL1	NA	NA	NA	NA	NA	NA
ENSG00000125637.11	PSD4	NA	NA	NA	NA	-1.21609	2.40339e-33
ENSG00000125675.13	GRIA3	NA	NA	NA	NA	NA	NA
ENSG00000125726.6	CD70	NA	NA	NA	NA	NA	NA
ENSG00000125730.12	C3	NA	NA	NA	NA	NA	NA
ENSG00000125820.5	NKX2-2	NA	NA	NA	NA	1.23075	0.011456
ENSG00000125845.6	BMP2	NA	NA	NA	NA	1.16563	6.12382e-65
ENSG00000125848.9	FLRT3	NA	NA	NA	NA	NA	NA
ENSG00000125851.5	PCSK2	NA	NA	NA	NA	-2.02343	1.22075e-06
ENSG00000125872.7	LRRN4	NA	NA	NA	NA	NA	NA
ENSG00000126016.9	AMOT	NA	NA	NA	NA	NA	NA
ENSG00000126218.7	F10	NA	NA	NA	NA	NA	NA
ENSG00000126231.9	PROZ	NA	NA	NA	NA	NA	NA
ENSG00000126353.3	CCR7	NA	NA	NA	NA	4.20314	8.2655e-35
ENSG00000126562.12	WNK4	NA	NA	NA	NA	NA	NA
ENSG00000126733.16	DACH2	NA	NA	NA	NA	NA	NA
ENSG00000127249.10	ATP13A4	NA	NA	NA	NA	NA	NA
ENSG00000127324.4	TSPAN8	NA	NA	NA	NA	NA	NA
ENSG00000127329.10	PTPRB	NA	NA	NA	NA	NA	NA
ENSG00000127377.4	CRYGN	NA	NA	NA	NA	NA	NA
ENSG00000127415.8	IDUA	NA	NA	NA	NA	NA	NA
ENSG00000127507.13	EMR2	NA	NA	NA	NA	NA	NA
ENSG00000127578.6	WFIKKN1	NA	NA	NA	NA	NA	NA
ENSG00000127831.6	VIL1	NA	NA	NA	NA	NA	NA
ENSG00000127863.11	TNFRSF19	NA	NA	NA	NA	1.07825	5.72586e-26
ENSG00000128052.8	KDR	NA	NA	NA	NA	NA	NA
ENSG00000128253.9	RFPL2	NA	NA	NA	NA	NA	NA
ENSG00000128271.15	ADORA2A	NA	NA	NA	NA	NA	NA
ENSG00000128284.15	APOL3	NA	NA	NA	NA	NA	NA
ENSG00000128285.4	MCHR1	NA	NA	NA	NA	NA	NA
ENSG00000128311.9	TST	NA	NA	NA	NA	NA	NA
ENSG00000128408.7	RIBC2	NA	NA	NA	NA	-1.45092	6.68294e-07
ENSG00000128564.5	VGF	NA	NA	NA	NA	NA	NA
ENSG00000128567.12	PODXL	NA	NA	NA	NA	NA	NA
ENSG00000128573.18	FOXP2	NA	NA	NA	NA	NA	NA
ENSG00000128591.11	FLNC	NA	NA	NA	NA	NA	NA
ENSG00000128594.3	LRRC4	NA	NA	NA	NA	NA	NA
ENSG00000128604.14	IRF5	NA	NA	NA	NA	1.02782	0.0347411
ENSG00000128606.8	LRRC17	NA	NA	NA	NA	NA	NA
ENSG00000128610.7	FEZF1	NA	NA	NA	NA	NA	NA
ENSG00000128655.12	PDE11A	NA	NA	NA	NA	-2.5017	2.5565e-26
ENSG00000129038.11	LOXL1	NA	NA	NA	NA	-1.44178	4.15976e-40
ENSG00000129194.3	SOX15	NA	NA	NA	NA	NA	NA
ENSG00000129514.4	FOXA1	NA	NA	NA	NA	1.20382	5.89421e-39
ENSG00000129521.9	EGLN3	NA	NA	NA	NA	NA	NA
ENSG00000129535.8	NRL	NA	NA	NA	NA	-1.38244	0.00207538
ENSG00000129538.9	RNASE1	NA	NA	NA	NA	1.18124	1.3682e-10
ENSG00000129654.7	FOXJ1	NA	NA	NA	NA	-2.06207	1.3635e-61
ENSG00000130038.5	EFCAB4B	NA	NA	NA	NA	1.91329	2.83563e-17
ENSG00000130055.9	GDPD2	NA	NA	NA	NA	NA	NA
ENSG00000130222.6	GADD45G	NA	NA	NA	NA	1.70855	4.11384e-21
ENSG00000130224.10	LRCH2	NA	NA	NA	NA	NA	NA
ENSG00000130234.6	ACE2	NA	NA	NA	NA	-1.88657	9.40552e-26
ENSG00000130270.12	ATP8B3	NA	NA	NA	NA	NA	NA
ENSG00000130294.10	KIF1A	NA	NA	NA	NA	1.60934	4.51588e-14
ENSG00000130303.8	BST2	NA	NA	NA	NA	NA	NA
ENSG00000130433.3	CACNG6	NA	NA	NA	NA	-1.17504	3.19523e-05
ENSG00000130513.6	GDF15	NA	NA	NA	NA	NA	NA
ENSG00000130517.9	PGPEP1	NA	NA	NA	NA	1.13253	2.27126e-22
ENSG00000130518.12	KIAA1683	NA	NA	NA	NA	NA	NA
ENSG00000130528.7	HRC	NA	NA	NA	NA	NA	NA
ENSG00000130558.14	OLFM1	NA	NA	NA	NA	NA	NA
ENSG00000130600.11	H19	NA	NA	NA	NA	NA	NA
ENSG00000130635.11	COL5A1	NA	NA	NA	NA	-1.36733	4.70001e-54
ENSG00000130700.6	GATA5	NA	NA	NA	NA	-3.33955	1.11481e-10
ENSG00000130701.3	RBBP8NL	NA	NA	NA	NA	NA	NA
ENSG00000130720.8	FIBCD1	NA	NA	NA	NA	NA	NA
ENSG00000130821.11	SLC6A8	NA	NA	NA	NA	1.04704	1.98902e-30
ENSG00000130822.11	PNCK	NA	NA	NA	NA	1.20284	6.02013e-09
ENSG00000130829.13	DUSP9	NA	NA	NA	NA	NA	NA
ENSG00000130830.10	MPP1	NA	NA	NA	NA	NA	NA
ENSG00000130988.8	RGN	NA	NA	NA	NA	NA	NA
ENSG00000131080.10	EDA2R	NA	NA	NA	NA	NA	NA
ENSG00000131096.6	PYY	NA	NA	NA	NA	-1.33946	0.00715978
ENSG00000131142.9	CCL25	NA	NA	NA	NA	NA	NA
ENSG00000131187.5	F12	NA	NA	NA	NA	1.77283	1.01898e-05
ENSG00000131203.8	IDO1	NA	NA	NA	NA	NA	NA
ENSG00000131378.9	RFTN1	NA	NA	NA	NA	NA	NA
ENSG00000131409.8	LRRC4B	NA	NA	NA	NA	NA	NA
ENSG00000131620.13	ANO1	NA	NA	NA	NA	NA	NA
ENSG00000131650.9	KREMEN2	NA	NA	NA	NA	NA	NA
ENSG00000131746.8	TNS4	NA	NA	NA	NA	NA	NA
ENSG00000131771.9	PPP1R1B	NA	NA	NA	NA	NA	NA
ENSG00000131781.8	FMO5	NA	NA	NA	NA	NA	NA
ENSG00000131969.10	ABHD12B	NA	NA	NA	NA	2.31731	4.22534e-13
ENSG00000131981.11	LGALS3	NA	NA	NA	NA	NA	NA
ENSG00000132031.8	MATN3	NA	NA	NA	NA	NA	NA
ENSG00000132130.7	LHX1	NA	NA	NA	NA	-3.54494	1.99304e-193
ENSG00000132205.6	EMILIN2	NA	NA	NA	NA	NA	NA
ENSG00000132259.8	CNGA4	NA	NA	NA	NA	NA	NA
ENSG00000132274.11	TRIM22	NA	NA	NA	NA	NA	NA
ENSG00000132297.7	HHLA1	NA	NA	NA	NA	NA	NA
ENSG00000132329.6	RAMP1	NA	NA	NA	NA	2.30487	2.90245e-11
ENSG00000132357.9	CARD6	NA	NA	NA	NA	NA	NA
ENSG00000132437.13	DDC	NA	NA	NA	NA	NA	NA
ENSG00000132498.7	ANKRD20A3	NA	NA	NA	NA	NA	NA
ENSG00000132517.10	SLC52A1	NA	NA	NA	NA	3.43274	2.47565e-16
ENSG00000132622.6	HSPA12B	NA	NA	NA	NA	NA	NA
ENSG00000132669.8	RIN2	NA	NA	NA	NA	NA	NA
ENSG00000132677.8	RHBG	NA	NA	NA	NA	-1.62562	4.05652e-08
ENSG00000132681.12	ATP1A4	NA	NA	NA	NA	NA	NA
ENSG00000132688.10	NES	NA	NA	NA	NA	NA	NA
ENSG00000132744.3	ACY3	NA	NA	NA	NA	NA	NA
ENSG00000132821.7	VSTM2L	NA	NA	NA	NA	NA	NA
ENSG00000132854.14	KANK4	NA	NA	NA	NA	NA	NA
ENSG00000132872.7	SYT4	NA	NA	NA	NA	NA	NA
ENSG00000132932.12	ATP8A2	NA	NA	NA	NA	NA	NA
ENSG00000133048.8	CHI3L1	NA	NA	NA	NA	-1.81147	1.53488e-05
ENSG00000133067.13	LGR6	NA	NA	NA	NA	-1.12191	0.00475912
ENSG00000133083.10	DCLK1	NA	NA	NA	NA	NA	NA
ENSG00000133110.10	POSTN	NA	NA	NA	NA	NA	NA
ENSG00000133116.6	KL	NA	NA	NA	NA	1.68321	1.61194e-07
ENSG00000133124.10	IRS4	NA	NA	NA	NA	NA	NA
ENSG00000133131.10	MORC4	NA	NA	NA	NA	1.24544	2.71731e-18
ENSG00000133135.9	RNF128	NA	NA	NA	NA	-1.24876	2.84873e-05
ENSG00000133216.12	EPHB2	NA	NA	NA	NA	-1.38078	2.88105e-67
ENSG00000133315.6	MACROD1	NA	NA	NA	NA	NA	NA
ENSG00000133317.10	LGALS12	NA	NA	NA	NA	NA	NA
ENSG00000133321.6	RARRES3	NA	NA	NA	NA	2.25918	1.18621e-13
ENSG00000133519.8	ZDHHC8P1	NA	NA	NA	NA	NA	NA
ENSG00000133636.6	NTS	NA	NA	NA	NA	NA	NA
ENSG00000133640.14	LRRIQ1	NA	NA	NA	NA	-1.25861	4.03851e-18
ENSG00000133794.13	ARNTL	NA	NA	NA	NA	NA	NA
ENSG00000133816.9	MICAL2	NA	NA	NA	NA	NA	NA
ENSG00000133958.9	UNC79	NA	NA	NA	NA	NA	NA
ENSG00000133980.4	VRTN	NA	NA	NA	NA	NA	NA
ENSG00000133985.2	TTC9	NA	NA	NA	NA	1.31429	5.25905e-66
ENSG00000134107.4	BHLHE40	NA	NA	NA	NA	NA	NA
ENSG00000134121.5	CHL1	NA	NA	NA	NA	-1.12242	3.82534e-08
ENSG00000134138.15	MEIS2	NA	NA	NA	NA	-4.57993	2.93647e-27
ENSG00000134202.6	GSTM3	NA	NA	NA	NA	4.03446	0
ENSG00000134207.10	SYT6	NA	NA	NA	NA	1.01962	5.32095e-17
ENSG00000134240.7	HMGCS2	NA	NA	NA	NA	NA	NA
ENSG00000134245.13	WNT2B	NA	NA	NA	NA	NA	NA
ENSG00000134250.13	NOTCH2	NA	NA	NA	NA	1.79676	7.18656e-73
ENSG00000134259.3	NGF	NA	NA	NA	NA	NA	NA
ENSG00000134317.13	GRHL1	NA	NA	NA	NA	2.12814	1.75109e-44
ENSG00000134352.15	IL6ST	NA	NA	NA	NA	NA	NA
ENSG00000134363.7	FST	NA	NA	NA	NA	-1.0026	3.10999e-23
ENSG00000134443.5	GRP	NA	NA	NA	NA	-4.5102	1.02392e-13
ENSG00000134531.5	EMP1	NA	NA	NA	NA	NA	NA
ENSG00000134532.11	SOX5	NA	NA	NA	NA	2.59847	9.37476e-180
ENSG00000134548.5	C12orf39	NA	NA	NA	NA	1.91492	0.00011499
ENSG00000134595.6	SOX3	NA	NA	NA	NA	NA	NA
ENSG00000134640.2	MTNR1B	NA	NA	NA	NA	1.58035	0.000718663
ENSG00000134716.5	CYP2J2	NA	NA	NA	NA	NA	NA
ENSG00000134769.17	DTNA	NA	NA	NA	NA	1.28697	3.06983e-63
ENSG00000134817.9	APLNR	NA	NA	NA	NA	NA	NA
ENSG00000134853.7	PDGFRA	NA	NA	NA	NA	NA	NA
ENSG00000134873.5	CLDN10	NA	NA	NA	NA	NA	NA
ENSG00000134917.9	ADAMTS8	NA	NA	NA	NA	NA	NA
ENSG00000134954.10	ETS1	NA	NA	NA	NA	NA	NA
ENSG00000135046.9	ANXA1	NA	NA	NA	NA	1.02118	3.90157e-07
ENSG00000135063.13	FAM189A2	NA	NA	NA	NA	NA	NA
ENSG00000135074.11	ADAM19	NA	NA	NA	NA	NA	NA
ENSG00000135100.13	HNF1A	NA	NA	NA	NA	NA	NA
ENSG00000135111.10	TBX3	NA	NA	-1.20494	4.49429e-07	-1.58679	1.29641e-94
ENSG00000135116.5	HRK	NA	NA	NA	NA	-1.79078	8.39547e-26
ENSG00000135205.10	CCDC146	NA	NA	NA	NA	NA	NA
ENSG00000135248.11	FAM71F1	NA	NA	1.27394	8.77688e-05	2.49229	4.48442e-23
ENSG00000135253.9	KCP	NA	NA	NA	NA	NA	NA
ENSG00000135312.4	HTR1B	NA	NA	NA	NA	NA	NA
ENSG00000135324.5	MRAP2	NA	NA	NA	NA	-1.20599	7.24919e-20
ENSG00000135333.9	EPHA7	NA	NA	NA	NA	2.14578	3.21531e-62
ENSG00000135373.8	EHF	NA	NA	NA	NA	NA	NA
ENSG00000135409.6	AMHR2	NA	NA	NA	NA	-1.25791	1.62893e-19
ENSG00000135439.7	AGAP2	NA	NA	NA	NA	NA	NA
ENSG00000135480.10	KRT7	NA	NA	NA	NA	NA	NA
ENSG00000135540.7	NHSL1	NA	NA	NA	NA	NA	NA
ENSG00000135547.4	HEY2	NA	NA	NA	NA	NA	NA
ENSG00000135587.4	SMPD2	-1.54264	2.85201e-17	-1.8661	2.07487e-27	-1.54721	6.46994e-14
ENSG00000135596.13	MICAL1	NA	NA	NA	NA	2.18888	6.32265e-119
ENSG00000135638.9	EMX1	NA	NA	NA	NA	NA	NA
ENSG00000135697.5	BCMO1	NA	NA	NA	NA	NA	NA
ENSG00000135744.7	AGT	NA	NA	NA	NA	NA	NA
ENSG00000135750.10	KCNK1	NA	NA	NA	NA	-1.01855	5.61169e-37
ENSG00000135773.8	CAPN9	NA	NA	NA	NA	2.02005	6.76973e-26
ENSG00000135824.8	RGS8	NA	NA	NA	NA	NA	NA
ENSG00000135835.6	KIAA1614	NA	NA	NA	NA	NA	NA
ENSG00000135842.12	FAM129A	NA	NA	NA	NA	1.00508	9.5626e-20
ENSG00000135898.5	GPR55	NA	NA	NA	NA	NA	NA
ENSG00000135917.9	SLC19A3	NA	NA	NA	NA	NA	NA
ENSG00000135919.8	SERPINE2	NA	NA	NA	NA	2.4074	8.85833e-163
ENSG00000136010.9	ALDH1L2	NA	NA	NA	NA	NA	NA
ENSG00000136040.4	PLXNC1	NA	NA	NA	NA	NA	NA
ENSG00000136052.5	SLC41A2	NA	NA	NA	NA	2.04798	2.11263e-22
ENSG00000136099.9	PCDH8	NA	NA	NA	NA	-1.29224	2.10787e-07
ENSG00000136110.8	LECT1	NA	NA	NA	NA	NA	NA
ENSG00000136114.11	THSD1	NA	NA	NA	NA	NA	NA
ENSG00000136153.15	LMO7	NA	NA	NA	NA	1.22368	1.02284e-53
ENSG00000136160.10	EDNRB	NA	NA	NA	NA	NA	NA
ENSG00000136167.9	LCP1	NA	NA	NA	NA	NA	NA
ENSG00000136205.12	TNS3	NA	NA	NA	NA	NA	NA
ENSG00000136235.11	GPNMB	NA	NA	NA	NA	NA	NA
ENSG00000136244.7	IL6	NA	NA	NA	NA	1.1922	0.0190619
ENSG00000136267.9	DGKB	NA	NA	NA	NA	-1.43666	5.34453e-16
ENSG00000136305.7	CIDEB	NA	NA	NA	NA	NA	NA
ENSG00000136457.5	CHAD	NA	NA	NA	NA	NA	NA
ENSG00000136535.10	TBR1	NA	NA	NA	NA	-1.64966	0.0113583
ENSG00000136541.10	ERMN	NA	NA	NA	NA	4.30127	0
ENSG00000136542.4	GALNT5	NA	NA	NA	NA	NA	NA
ENSG00000136546.9	SCN7A	NA	NA	NA	NA	-2.18392	0.00202129
ENSG00000136698.4	CFC1	NA	NA	NA	NA	-5.44818	1.15047e-05
ENSG00000136826.10	KLF4	NA	NA	NA	NA	NA	NA
ENSG00000136859.5	ANGPTL2	NA	NA	NA	NA	-1.36685	2.23417e-36
ENSG00000136883.8	KIF12	NA	NA	NA	NA	NA	NA
ENSG00000136928.4	GABBR2	NA	NA	NA	NA	NA	NA
ENSG00000136944.13	LMX1B	NA	NA	-1.06223	2.79107e-18	-3.59429	2.02357e-91
ENSG00000136960.8	ENPP2	NA	NA	NA	NA	NA	NA
ENSG00000136997.10	MYC	NA	NA	NA	NA	NA	NA
ENSG00000137033.7	IL33	NA	NA	NA	NA	NA	NA
ENSG00000137098.9	SPAG8	NA	NA	NA	NA	NA	NA
ENSG00000137142.4	IGFBPL1	NA	NA	NA	NA	NA	NA
ENSG00000137166.10	FOXP4	NA	NA	NA	NA	NA	NA
ENSG00000137198.5	GMPR	NA	NA	NA	NA	3.09792	9.81961e-233
ENSG00000137261.9	KIAA0319	NA	NA	NA	NA	NA	NA
ENSG00000137265.10	IRF4	NA	NA	NA	NA	NA	NA
ENSG00000137267.5	TUBB2A	NA	NA	NA	NA	NA	NA
ENSG00000137310.7	TCF19	NA	NA	NA	NA	NA	NA
ENSG00000137331.11	IER3	NA	NA	NA	NA	NA	NA
ENSG00000137393.8	RNF144B	NA	NA	NA	NA	NA	NA
ENSG00000137463.4	MGARP	NA	NA	NA	NA	NA	NA
ENSG00000137473.13	TTC29	NA	NA	NA	NA	1.58975	2.86442e-34
ENSG00000137478.10	FCHSD2	NA	NA	NA	NA	1.49625	3.13432e-42
ENSG00000137491.10	SLCO2B1	NA	NA	NA	NA	-2.4862	0.00223525
ENSG00000137501.12	SYTL2	NA	NA	NA	NA	NA	NA
ENSG00000137507.7	LRRC32	NA	NA	NA	NA	NA	NA
ENSG00000137571.6	SLCO5A1	NA	NA	NA	NA	NA	NA
ENSG00000137573.9	SULF1	NA	NA	NA	NA	NA	NA
ENSG00000137672.8	TRPC6	NA	NA	NA	NA	3.75494	7.08812e-242
ENSG00000137709.5	POU2F3	NA	NA	NA	NA	NA	NA
ENSG00000137727.8	ARHGAP20	NA	NA	NA	NA	NA	NA
ENSG00000137747.10	TMPRSS13	NA	NA	NA	NA	NA	NA
ENSG00000137766.12	UNC13C	NA	NA	NA	NA	-1.80186	6.09434e-17
ENSG00000137801.9	THBS1	NA	NA	NA	NA	NA	NA
ENSG00000137809.12	ITGA11	NA	NA	NA	NA	NA	NA
ENSG00000137819.9	PAQR5	NA	NA	NA	NA	-2.52401	1.6637e-153
ENSG00000137834.10	SMAD6	NA	NA	NA	NA	-2.12564	2.18111e-180
ENSG00000137860.7	SLC28A2	NA	NA	NA	NA	NA	NA
ENSG00000137868.14	STRA6	NA	NA	NA	NA	NA	NA
ENSG00000137948.14	BRDT	NA	NA	NA	NA	NA	NA
ENSG00000137960.5	GIPC2	NA	NA	NA	NA	NA	NA
ENSG00000138028.10	CGREF1	NA	NA	NA	NA	NA	NA
ENSG00000138030.8	KHK	NA	NA	NA	NA	NA	NA
ENSG00000138083.3	SIX3	NA	NA	NA	NA	NA	NA
ENSG00000138100.9	TRIM54	NA	NA	NA	NA	NA	NA
ENSG00000138115.9	CYP2C8	NA	NA	NA	NA	NA	NA
ENSG00000138119.12	MYOF	NA	NA	NA	NA	-1.72237	6.84336e-108
ENSG00000138131.3	LOXL4	NA	NA	NA	NA	NA	NA
ENSG00000138161.8	CUZD1	NA	NA	NA	NA	NA	NA
ENSG00000138166.5	DUSP5	NA	NA	NA	NA	-1.5414	1.50148e-83
ENSG00000138180.11	CEP55	NA	NA	NA	NA	-1.33462	4.81521e-41
ENSG00000138193.10	PLCE1	NA	NA	NA	NA	NA	NA
ENSG00000138207.8	RBP4	NA	NA	NA	NA	-1.25872	0.00288817
ENSG00000138271.4	GPR87	NA	NA	NA	NA	NA	NA
ENSG00000138294.9	MSMB	NA	NA	NA	NA	NA	NA
ENSG00000138308.5	PLA2G12B	NA	NA	NA	NA	NA	NA
ENSG00000138356.9	AOX1	NA	NA	NA	NA	-1.72268	1.07896e-45
ENSG00000138378.13	STAT4	NA	NA	NA	NA	-1.50598	2.51161e-13
ENSG00000138411.6	HECW2	NA	NA	NA	NA	NA	NA
ENSG00000138449.6	SLC40A1	NA	NA	NA	NA	-1.94619	1.26147e-114
ENSG00000138617.10	PARP16	NA	NA	NA	NA	1.02795	5.38714e-12
ENSG00000138622.3	HCN4	NA	NA	NA	NA	NA	NA
ENSG00000138639.13	ARHGAP24	NA	NA	NA	NA	-1.23043	1.80098e-37
ENSG00000138642.10	HERC6	NA	NA	NA	NA	NA	NA
ENSG00000138650.7	PCDH10	NA	NA	NA	NA	NA	NA
ENSG00000138685.8	FGF2	NA	NA	NA	NA	NA	NA
ENSG00000138756.13	BMP2K	NA	NA	NA	NA	NA	NA
ENSG00000138772.8	ANXA3	NA	NA	NA	NA	NA	NA
ENSG00000138792.5	ENPEP	NA	NA	NA	NA	-3.32009	4.79019e-106
ENSG00000138795.5	LEF1	NA	NA	NA	NA	NA	NA
ENSG00000138798.7	EGF	NA	NA	NA	NA	2.57867	3.69989e-241
ENSG00000138821.8	SLC39A8	NA	NA	NA	NA	NA	NA
ENSG00000138823.8	MTTP	NA	NA	NA	NA	2.01215	8.59575e-36
ENSG00000138829.6	FBN2	NA	NA	NA	NA	NA	NA
ENSG00000138944.7	KIAA1644	NA	NA	NA	NA	NA	NA
ENSG00000139055.2	ERP27	NA	NA	NA	NA	-3.31254	0.0201025
ENSG00000139155.4	SLCO1C1	NA	NA	NA	NA	NA	NA
ENSG00000139209.11	SLC38A4	NA	NA	NA	NA	NA	NA
ENSG00000139219.13	COL2A1	NA	NA	NA	NA	1.08348	1.55908e-33
ENSG00000139269.2	INHBE	NA	NA	NA	NA	NA	NA
ENSG00000139289.9	PHLDA1	NA	NA	NA	NA	NA	NA
ENSG00000139292.8	LGR5	NA	NA	-2.11725	1.07045e-12	-3.22304	1.34898e-138
ENSG00000139318.7	DUSP6	NA	NA	NA	NA	NA	NA
ENSG00000139329.4	LUM	NA	NA	NA	NA	-2.13147	0.00715257
ENSG00000139344.3	AMDHD1	NA	NA	NA	NA	-1.09845	0.00311031
ENSG00000139438.5	FAM222A	NA	NA	NA	NA	-1.74894	1.21732e-41
ENSG00000139445.13	FOXN4	NA	NA	NA	NA	NA	NA
ENSG00000139508.10	SLC46A3	NA	NA	NA	NA	-1.08507	3.19032e-06
ENSG00000139540.7	SLC39A5	NA	NA	NA	NA	-1.26308	0.0175798
ENSG00000139597.12	N4BP2L1	NA	NA	NA	NA	NA	NA
ENSG00000139626.11	ITGB7	NA	NA	NA	NA	-1.72274	0.0132471
ENSG00000139679.11	LPAR6	NA	NA	NA	NA	NA	NA
ENSG00000139793.14	MBNL2	NA	NA	NA	NA	NA	NA
ENSG00000139865.12	TTC6	NA	NA	NA	NA	1.90488	1.04822e-38
ENSG00000139874.5	SSTR1	NA	NA	NA	NA	NA	NA
ENSG00000139915.14	MDGA2	NA	NA	NA	NA	1.2857	0.000859056
ENSG00000139998.10	RAB15	NA	NA	NA	NA	2.76357	0
ENSG00000140015.15	KCNH5	NA	NA	NA	NA	NA	NA
ENSG00000140104.9	C14orf79	NA	NA	NA	NA	-1.00718	2.18164e-11
ENSG00000140284.6	SLC27A2	NA	NA	NA	NA	NA	NA
ENSG00000140297.8	GCNT3	NA	NA	NA	NA	3.083	1.85349e-27
ENSG00000140323.4	DISP2	NA	NA	NA	NA	NA	NA
ENSG00000140416.15	TPM1	NA	NA	NA	NA	1.08982	3.7285e-44
ENSG00000140450.7	ARRDC4	NA	NA	NA	NA	NA	NA
ENSG00000140459.13	CYP11A1	NA	NA	NA	NA	NA	NA
ENSG00000140470.9	ADAMTS17	NA	NA	NA	NA	NA	NA
ENSG00000140538.12	NTRK3	NA	NA	NA	NA	1.5269	2.19669e-09
ENSG00000140795.8	MYLK3	NA	NA	NA	NA	-1.36469	4.60952e-06
ENSG00000140873.11	ADAMTS18	NA	NA	NA	NA	-2.1642	2.74434e-51
ENSG00000140937.9	CDH11	NA	NA	NA	NA	NA	NA
ENSG00000140945.11	CDH13	NA	NA	NA	NA	NA	NA
ENSG00000140961.8	OSGIN1	NA	NA	NA	NA	NA	NA
ENSG00000141052.13	MYOCD	NA	NA	NA	NA	-1.81429	1.03059e-23
ENSG00000141293.11	SKAP1	NA	NA	NA	NA	NA	NA
ENSG00000141298.13	SSH2	NA	NA	NA	NA	NA	NA
ENSG00000141337.8	ARSG	NA	NA	NA	NA	NA	NA
ENSG00000141404.11	GNAL	NA	NA	NA	NA	1.33858	2.46e-53
ENSG00000141431.5	ASXL3	NA	NA	NA	NA	NA	NA
ENSG00000141449.10	GREB1L	NA	NA	NA	NA	-2.65254	5.87428e-26
ENSG00000141485.11	SLC13A5	NA	NA	NA	NA	-1.32264	5.91279e-22
ENSG00000141506.9	PIK3R5	NA	NA	NA	NA	-1.82451	2.593e-38
ENSG00000141655.11	TNFRSF11A	NA	NA	NA	NA	-1.44636	1.57727e-40
ENSG00000141682.11	PMAIP1	NA	NA	NA	NA	NA	NA
ENSG00000141854.3	hsa-mir-1199	NA	NA	NA	NA	1.53323	0.00188744
ENSG00000142156.10	COL6A1	NA	NA	NA	NA	NA	NA
ENSG00000142173.10	COL6A2	NA	NA	NA	NA	NA	NA
ENSG00000142178.7	SIK1	NA	NA	NA	NA	NA	NA
ENSG00000142182.4	DNMT3L	NA	NA	NA	NA	NA	NA
ENSG00000142227.6	EMP3	NA	NA	NA	NA	NA	NA
ENSG00000142233.7	NTN5	NA	NA	NA	NA	NA	NA
ENSG00000142405.17	NLRP12	NA	NA	NA	NA	NA	NA
ENSG00000142494.9	SLC47A1	NA	NA	NA	NA	NA	NA
ENSG00000142611.12	PRDM16	NA	NA	NA	NA	NA	NA
ENSG00000142621.15	FHAD1	NA	NA	NA	NA	-1.21247	3.07839e-07
ENSG00000142627.9	EPHA2	NA	NA	NA	NA	NA	NA
ENSG00000142698.10	C1orf94	NA	NA	NA	NA	NA	NA
ENSG00000142700.7	DMRTA2	NA	NA	NA	NA	1.46306	2.36233e-10
ENSG00000142798.12	HSPG2	NA	NA	NA	NA	1.10667	0.00162459
ENSG00000142871.11	CYR61	NA	NA	NA	NA	NA	NA
ENSG00000142920.12	ADC	NA	NA	NA	NA	-1.25534	0.00206702
ENSG00000142973.8	CYP4B1	NA	NA	NA	NA	2.10857	2.84474e-07
ENSG00000143028.7	SYPL2	NA	NA	NA	NA	NA	NA
ENSG00000143167.7	GPA33	NA	NA	NA	NA	NA	NA
ENSG00000143171.8	RXRG	NA	NA	NA	NA	-1.22936	1.51774e-05
ENSG00000143248.8	RGS5	NA	NA	NA	NA	-1.69095	3.27994e-50
ENSG00000143297.14	FCRL5	NA	NA	NA	NA	NA	NA
ENSG00000143318.8	CASQ1	NA	NA	NA	NA	NA	NA
ENSG00000143320.4	CRABP2	NA	NA	NA	NA	-1.35972	9.6378e-54
ENSG00000143333.6	RGS16	NA	NA	NA	NA	NA	NA
ENSG00000143344.11	RGL1	NA	NA	NA	NA	NA	NA
ENSG00000143369.10	ECM1	NA	NA	NA	NA	NA	NA
ENSG00000143375.10	CGN	NA	NA	NA	NA	NA	NA
ENSG00000143412.5	ANXA9	NA	NA	NA	NA	NA	NA
ENSG00000143450.10	OAZ3	NA	NA	NA	NA	NA	NA
ENSG00000143473.7	KCNH1	NA	NA	NA	NA	-1.13291	5.43328e-05
ENSG00000143479.11	DYRK3	NA	NA	NA	NA	NA	NA
ENSG00000143502.10	SUSD4	NA	NA	NA	NA	1.07897	0.00484309
ENSG00000143507.13	DUSP10	NA	NA	NA	NA	NA	NA
ENSG00000143512.8	HHIPL2	NA	NA	NA	NA	-1.5273	1.72136e-07
ENSG00000143632.10	ACTA1	NA	NA	NA	NA	NA	NA
ENSG00000143768.7	LEFTY2	NA	NA	NA	NA	NA	NA
ENSG00000143858.7	SYT2	NA	NA	NA	NA	-1.54698	1.19237e-36
ENSG00000143995.15	MEIS1	NA	NA	NA	NA	NA	NA
ENSG00000144152.8	FBLN7	NA	NA	NA	NA	NA	NA
ENSG00000144218.14	AFF3	NA	NA	NA	NA	NA	NA
ENSG00000144227.4	NXPH2	NA	NA	NA	NA	-1.20797	7.63309e-05
ENSG00000144285.11	SCN1A	NA	NA	NA	NA	NA	NA
ENSG00000144331.14	ZNF385B	NA	NA	NA	NA	NA	NA
ENSG00000144339.7	TMEFF2	NA	NA	NA	NA	NA	NA
ENSG00000144355.10	DLX1	NA	NA	NA	NA	4.87405	9.8611e-15
ENSG00000144366.11	GULP1	NA	NA	NA	NA	NA	NA
ENSG00000144406.14	UNC80	NA	NA	NA	NA	NA	NA
ENSG00000144476.5	ACKR3	NA	NA	NA	NA	-2.00454	1.94622e-53
ENSG00000144583.4	MARCH4	NA	NA	NA	NA	NA	NA
ENSG00000144619.10	CNTN4	NA	NA	NA	NA	NA	NA
ENSG00000144642.16	RBMS3	NA	NA	NA	NA	1.72682	5.72037e-63
ENSG00000144668.7	ITGA9	NA	NA	NA	NA	-1.88666	9.26397e-119
ENSG00000144681.6	STAC	NA	NA	NA	NA	NA	NA
ENSG00000144802.7	NFKBIZ	NA	NA	NA	NA	NA	NA
ENSG00000144810.11	COL8A1	NA	NA	NA	NA	-2.90858	4.70576e-15
ENSG00000144834.8	TAGLN3	NA	NA	NA	NA	1.42846	5.77137e-12
ENSG00000144837.4	PLA1A	NA	NA	NA	NA	-2.25494	1.69252e-44
ENSG00000144847.8	IGSF11	NA	NA	NA	NA	-2.32121	2.10237e-40
ENSG00000144893.8	MED12L	NA	NA	NA	NA	1.01519	1.3999e-22
ENSG00000144908.9	ALDH1L1	NA	NA	NA	NA	NA	NA
ENSG00000144959.5	NCEH1	NA	NA	NA	NA	NA	NA
ENSG00000145147.15	SLIT2	NA	NA	NA	NA	NA	NA
ENSG00000145246.9	ATP10D	NA	NA	NA	NA	NA	NA
ENSG00000145284.7	SCD5	NA	NA	NA	NA	NA	NA
ENSG00000145321.8	GC	NA	NA	NA	NA	-3.50014	0.0427442
ENSG00000145358.2	DDIT4L	NA	NA	NA	NA	-1.09562	4.10455e-24
ENSG00000145416.9	MARCH1	NA	NA	NA	NA	NA	NA
ENSG00000145423.4	SFRP2	NA	NA	NA	NA	NA	NA
ENSG00000145536.11	ADAMTS16	NA	NA	NA	NA	NA	NA
ENSG00000145555.10	MYO10	NA	NA	NA	NA	1.02623	6.56073e-63
ENSG00000145623.8	OSMR	NA	NA	NA	NA	NA	NA
ENSG00000145632.10	PLK2	NA	NA	NA	NA	NA	NA
ENSG00000145642.7	FAM159B	NA	NA	NA	NA	NA	NA
ENSG00000145681.6	HAPLN1	NA	NA	NA	NA	NA	NA
ENSG00000145692.10	BHMT	NA	NA	NA	NA	-1.90143	1.34961e-08
ENSG00000145703.11	IQGAP2	NA	NA	NA	NA	NA	NA
ENSG00000145708.6	CRHBP	NA	NA	NA	NA	NA	NA
ENSG00000145824.8	CXCL14	NA	NA	1.66331	4.5914e-06	5.53401	4.36455e-63
ENSG00000145832.8	SLC25A48	NA	NA	NA	NA	NA	NA
ENSG00000145864.8	GABRB2	NA	NA	NA	NA	NA	NA
ENSG00000145990.6	GFOD1	NA	NA	NA	NA	NA	NA
ENSG00000146005.3	PSD2	NA	NA	NA	NA	-1.43788	1.5851e-09
ENSG00000146013.6	GFRA3	NA	NA	NA	NA	1.32923	0.00751001
ENSG00000146038.7	DCDC2	NA	NA	NA	NA	NA	NA
ENSG00000146094.9	DOK3	NA	NA	NA	NA	NA	NA
ENSG00000146151.8	HMGCLL1	NA	NA	NA	NA	-1.0307	0.0439031
ENSG00000146216.7	TTBK1	NA	NA	NA	NA	NA	NA
ENSG00000146374.9	RSPO3	NA	NA	NA	NA	NA	NA
ENSG00000146386.7	ABRACL	NA	NA	NA	NA	1.01945	1.85183e-37
ENSG00000146476.6	C6orf211	NA	NA	NA	NA	1.22205	2.25259e-78
ENSG00000146648.11	EGFR	NA	NA	NA	NA	NA	NA
ENSG00000146674.10	IGFBP3	NA	NA	NA	NA	-3.37122	1.08887e-17
ENSG00000147003.5	TMEM27	NA	NA	NA	NA	NA	NA
ENSG00000147041.7	SYTL5	NA	NA	NA	NA	1.35843	2.51769e-08
ENSG00000147082.13	CCNB3	NA	NA	NA	NA	NA	NA
ENSG00000147117.7	ZNF157	NA	NA	NA	NA	1.67996	7.59132e-07
ENSG00000147119.3	CHST7	NA	NA	NA	NA	NA	NA
ENSG00000147145.8	LPAR4	NA	NA	NA	NA	2.16467	3.6261e-109
ENSG00000147223.5	RIPPLY1	NA	NA	NA	NA	NA	NA
ENSG00000147234.6	FRMPD3	NA	NA	NA	NA	NA	NA
ENSG00000147255.13	IGSF1	NA	NA	NA	NA	1.00206	2.08768e-32
ENSG00000147256.6	ARHGAP36	NA	NA	NA	NA	NA	NA
ENSG00000147257.9	GPC3	NA	NA	NA	NA	1.48629	6.70353e-74
ENSG00000147324.6	MFHAS1	NA	NA	NA	NA	1.2238	3.45841e-67
ENSG00000147402.7	GABRQ	NA	NA	NA	NA	NA	NA
ENSG00000147408.10	CSGALNACT1	NA	NA	NA	NA	NA	NA
ENSG00000147509.9	RGS20	NA	NA	NA	NA	1.90319	2.60542e-07
ENSG00000147535.12	PPAPDC1B	NA	NA	NA	NA	1.15032	9.18856e-42
ENSG00000147596.3	PRDM14	NA	NA	NA	NA	NA	NA
ENSG00000147613.3	PSKH2	NA	NA	NA	NA	-1.37485	1.94443e-06
ENSG00000147647.8	DPYS	NA	NA	NA	NA	NA	NA
ENSG00000147724.7	FAM135B	NA	NA	NA	NA	NA	NA
ENSG00000147804.5	SLC39A4	NA	NA	NA	NA	NA	NA
ENSG00000147852.11	VLDLR	NA	NA	NA	NA	NA	NA
ENSG00000147869.4	CER1	NA	NA	NA	NA	1.07004	0.0181544
ENSG00000147883.9	CDKN2B	NA	NA	NA	NA	-1.8539	1.4843e-10
ENSG00000147889.12	CDKN2A	NA	NA	NA	NA	-3.35818	1.25099e-08
ENSG00000148082.5	SHC3	NA	NA	NA	NA	NA	NA
ENSG00000148123.10	LPPR1	NA	NA	NA	NA	NA	NA
ENSG00000148175.8	STOM	NA	NA	NA	NA	1.20424	1.2018e-69
ENSG00000148204.7	CRB2	NA	NA	NA	NA	1.82874	2.69935e-49
ENSG00000148408.8	CACNA1B	NA	NA	NA	NA	NA	NA
ENSG00000148516.17	ZEB1	NA	NA	NA	NA	NA	NA
ENSG00000148584.10	A1CF	NA	NA	NA	NA	-2.752	4.59339e-08
ENSG00000148600.10	CDHR1	NA	NA	NA	NA	NA	NA
ENSG00000148655.10	C10orf11	NA	NA	NA	NA	NA	NA
ENSG00000148677.6	ANKRD1	NA	NA	NA	NA	NA	NA
ENSG00000148680.11	HTR7	NA	NA	NA	NA	NA	NA
ENSG00000148702.10	HABP2	NA	NA	NA	NA	NA	NA
ENSG00000148704.8	VAX1	NA	NA	NA	NA	-1.67582	5.7381e-14
ENSG00000148834.8	GSTO1	NA	NA	NA	NA	-1.02162	3.04581e-29
ENSG00000148926.5	ADM	NA	NA	NA	NA	1.16644	7.15419e-53
ENSG00000149090.7	PAMR1	NA	NA	NA	NA	-1.61542	2.82522e-74
ENSG00000149201.5	CCDC81	NA	NA	NA	NA	-1.67138	7.37176e-37
ENSG00000149256.10	TENM4	NA	NA	NA	NA	NA	NA
ENSG00000149294.12	NCAM1	NA	NA	NA	NA	1.09482	2.06706e-08
ENSG00000149418.6	ST14	NA	NA	NA	NA	NA	NA
ENSG00000149557.8	FEZ1	NA	NA	NA	NA	NA	NA
ENSG00000149564.7	ESAM	NA	NA	NA	NA	-2.80745	0.0225432
ENSG00000149573.4	MPZL2	NA	NA	NA	NA	NA	NA
ENSG00000149591.12	TAGLN	NA	NA	NA	NA	NA	NA
ENSG00000149735.2	GPHA2	NA	NA	NA	NA	-1.47649	0.0432396
ENSG00000149970.10	CNKSR2	NA	NA	NA	NA	NA	NA
ENSG00000149972.6	CNTN5	NA	NA	NA	NA	-3.51743	1.13398e-44
ENSG00000150051.9	MKX	NA	NA	NA	NA	NA	NA
ENSG00000150054.14	MPP7	NA	NA	NA	NA	NA	NA
ENSG00000150201.10	FXYD4	NA	NA	NA	NA	2.91909	7.47115e-06
ENSG00000150275.13	PCDH15	NA	NA	NA	NA	NA	NA
ENSG00000150347.10	ARID5B	NA	NA	NA	NA	-1.22788	2.92116e-14
ENSG00000150394.9	CDH8	NA	NA	NA	NA	NA	NA
ENSG00000150471.11	LPHN3	NA	NA	NA	NA	1.19293	1.9316e-47
ENSG00000150510.11	FAM124A	NA	NA	NA	NA	NA	NA
ENSG00000150551.10	LYPD1	NA	NA	NA	NA	NA	NA
ENSG00000150556.12	LYPD6B	NA	NA	NA	NA	-1.76582	8.24868e-23
ENSG00000150594.5	ADRA2A	NA	NA	NA	NA	NA	NA
ENSG00000150625.12	GPM6A	NA	NA	NA	NA	2.08592	4.67917e-169
ENSG00000150630.2	VEGFC	NA	NA	NA	NA	NA	NA
ENSG00000150687.7	PRSS23	NA	NA	NA	NA	NA	NA
ENSG00000150782.7	IL18	NA	NA	NA	NA	NA	NA
ENSG00000150867.9	PIP4K2A	NA	NA	NA	NA	NA	NA
ENSG00000151012.9	SLC7A11	NA	NA	NA	NA	NA	NA
ENSG00000151062.10	CACNA2D4	NA	NA	NA	NA	-1.42742	2.84919e-10
ENSG00000151067.16	CACNA1C	NA	NA	NA	NA	NA	NA
ENSG00000151090.13	THRB	NA	NA	NA	NA	2.19748	1.44857e-35
ENSG00000151117.4	TMEM86A	NA	NA	NA	NA	1.47896	6.94754e-25
ENSG00000151322.14	NPAS3	NA	NA	NA	NA	NA	NA
ENSG00000151376.12	ME3	NA	NA	NA	NA	NA	NA
ENSG00000151388.6	ADAMTS12	NA	NA	NA	NA	-1.46207	2.65483e-63
ENSG00000151418.7	ATP6V1G3	NA	NA	NA	NA	NA	NA
ENSG00000151474.15	FRMD4A	NA	NA	NA	NA	NA	NA
ENSG00000151490.9	PTPRO	NA	NA	NA	NA	NA	NA
ENSG00000151640.8	DPYSL4	NA	NA	NA	NA	1.04898	1.46566e-11
ENSG00000151650.7	VENTX	NA	NA	NA	NA	NA	NA
ENSG00000151651.11	ADAM8	NA	NA	NA	NA	1.0954	3.77132e-08
ENSG00000151689.8	INPP1	NA	NA	NA	NA	NA	NA
ENSG00000151690.10	MFSD6	NA	NA	NA	NA	2.12119	3.42438e-72
ENSG00000151726.9	ACSL1	NA	NA	NA	NA	NA	NA
ENSG00000151746.9	BICD1	NA	NA	NA	NA	1.86136	8.51264e-126
ENSG00000151790.4	TDO2	NA	NA	NA	NA	NA	NA
ENSG00000151834.11	GABRA2	NA	NA	NA	NA	NA	NA
ENSG00000151892.10	GFRA1	NA	NA	NA	NA	NA	NA
ENSG00000151917.13	BEND6	NA	NA	NA	NA	NA	NA
ENSG00000151967.14	SCHIP1	NA	NA	NA	NA	NA	NA
ENSG00000152022.7	LIX1L	NA	NA	NA	NA	NA	NA
ENSG00000152056.12	AP1S3	NA	NA	NA	NA	NA	NA
ENSG00000152137.2	HSPB8	NA	NA	NA	NA	1.07069	1.32456e-17
ENSG00000152214.8	RIT2	NA	NA	NA	NA	NA	NA
ENSG00000152217.12	SETBP1	NA	NA	NA	NA	NA	NA
ENSG00000152229.14	PSTPIP2	NA	NA	NA	NA	-1.52185	1.1318e-26
ENSG00000152268.8	SPON1	NA	NA	NA	NA	NA	NA
ENSG00000152292.12	SH2D6	NA	NA	NA	NA	1.31593	0.00647255
ENSG00000152315.4	KCNK13	NA	NA	NA	NA	1.22965	1.41682e-10
ENSG00000152377.8	SPOCK1	NA	NA	NA	NA	-1.95118	2.41436e-77
ENSG00000152467.5	ZSCAN1	NA	NA	NA	NA	NA	NA
ENSG00000152578.8	GRIA4	NA	NA	NA	NA	NA	NA
ENSG00000152580.8	IGSF10	NA	NA	NA	NA	NA	NA
ENSG00000152583.8	SPARCL1	NA	NA	NA	NA	NA	NA
ENSG00000152601.13	MBNL1	NA	NA	NA	NA	NA	NA
ENSG00000152611.7	CAPSL	NA	NA	NA	NA	NA	NA
ENSG00000152642.6	GPD1L	NA	NA	NA	NA	NA	NA
ENSG00000152669.8	CCNO	NA	NA	NA	NA	-1.38051	2.49115e-06
ENSG00000152760.5	TCTEX1D1	NA	NA	NA	NA	NA	NA
ENSG00000152779.12	SLC16A12	NA	NA	NA	NA	NA	NA
ENSG00000152804.6	HHEX	NA	NA	NA	NA	-1.76356	5.72454e-126
ENSG00000152910.14	CNTNAP4	NA	NA	NA	NA	NA	NA
ENSG00000152936.6	IFLTD1	NA	NA	NA	NA	-1.65571	3.78447e-25
ENSG00000152969.12	JAKMIP1	NA	NA	NA	NA	NA	NA
ENSG00000153012.7	LGI2	NA	NA	NA	NA	1.03649	2.09208e-20
ENSG00000153029.10	MR1	NA	NA	NA	NA	NA	NA
ENSG00000153071.10	DAB2	NA	NA	NA	NA	3.95081	0
ENSG00000153132.8	CLGN	NA	NA	NA	NA	NA	NA
ENSG00000153162.8	BMP6	NA	NA	NA	NA	1.53534	6.31019e-09
ENSG00000153294.7	GPR115	NA	NA	NA	NA	1.70045	3.47509e-11
ENSG00000153363.8	LINC00467	NA	NA	NA	NA	NA	NA
ENSG00000153531.8	ADPRHL1	NA	NA	NA	NA	NA	NA
ENSG00000153714.5	LURAP1L	NA	NA	NA	NA	NA	NA
ENSG00000153721.13	CNKSR3	NA	NA	NA	NA	NA	NA
ENSG00000153822.9	KCNJ16	NA	NA	NA	NA	NA	NA
ENSG00000153823.14	PID1	NA	NA	NA	NA	NA	NA
ENSG00000153904.14	DDAH1	NA	NA	NA	NA	NA	NA
ENSG00000153976.2	HS3ST3A1	NA	NA	NA	NA	NA	NA
ENSG00000153993.9	SEMA3D	NA	NA	NA	NA	NA	NA
ENSG00000154035.6	C17orf103	NA	NA	NA	NA	1.31767	1.44321e-38
ENSG00000154080.8	CHST9	NA	NA	NA	NA	-1.6743	1.03828e-65
ENSG00000154122.8	ANKH	NA	NA	NA	NA	NA	NA
ENSG00000154127.5	UBASH3B	NA	NA	NA	NA	NA	NA
ENSG00000154146.8	NRGN	NA	NA	NA	NA	-2.28097	7.6895e-07
ENSG00000154162.9	CDH12	NA	NA	NA	NA	1.31183	6.38154e-19
ENSG00000154188.5	ANGPT1	NA	NA	NA	NA	1.46653	3.62199e-33
ENSG00000154237.8	LRRK1	NA	NA	NA	NA	NA	NA
ENSG00000154265.11	ABCA5	NA	NA	NA	NA	2.79205	1.10239e-168
ENSG00000154274.10	C4orf19	NA	NA	NA	NA	NA	NA
ENSG00000154479.8	CCDC173	NA	NA	NA	NA	-1.25375	3.19313e-07
ENSG00000154556.13	SORBS2	NA	NA	NA	NA	1.29134	8.61389e-39
ENSG00000154645.9	CHODL	NA	NA	NA	NA	1.28749	3.764e-22
ENSG00000154646.4	TMPRSS15	NA	NA	NA	NA	2.38112	2.30185e-07
ENSG00000154721.10	JAM2	NA	NA	NA	NA	NA	NA
ENSG00000154736.5	ADAMTS5	NA	NA	1.1662	6.43632e-11	2.10073	7.67016e-78
ENSG00000154864.7	PIEZO2	NA	NA	NA	NA	NA	NA
ENSG00000154917.6	RAB6B	NA	NA	NA	NA	1.06026	2.40623e-12
ENSG00000155269.7	GPR78	NA	NA	NA	NA	NA	NA
ENSG00000155275.14	TRMT44	NA	NA	NA	NA	NA	NA
ENSG00000155282.7	RP11-195B21.3	NA	NA	NA	NA	NA	NA
ENSG00000155307.13	SAMSN1	NA	NA	NA	NA	NA	NA
ENSG00000155465.14	SLC7A7	NA	NA	NA	NA	NA	NA
ENSG00000155511.13	GRIA1	NA	NA	NA	NA	2.02693	0.0205512
ENSG00000155657.19	TTN	NA	NA	NA	NA	-3.41998	3.08984e-247
ENSG00000155749.8	ALS2CR12	NA	NA	NA	NA	NA	NA
ENSG00000155760.1	FZD7	NA	NA	NA	NA	-1.85589	5.21198e-156
ENSG00000155761.9	SPAG17	NA	NA	NA	NA	-1.05423	3.43377e-07
ENSG00000155792.5	DEPTOR	NA	NA	NA	NA	1.61888	6.27338e-08
ENSG00000155849.11	ELMO1	NA	NA	NA	NA	-1.01934	2.58254e-38
ENSG00000155886.7	SLC24A2	NA	NA	NA	NA	NA	NA
ENSG00000155980.7	KIF5A	NA	NA	NA	NA	NA	NA
ENSG00000156049.6	GNA14	NA	NA	NA	NA	NA	NA
ENSG00000156076.5	WIF1	NA	NA	NA	NA	NA	NA
ENSG00000156113.16	KCNMA1	NA	NA	NA	NA	NA	NA
ENSG00000156140.4	ADAMTS3	NA	NA	NA	NA	NA	NA
ENSG00000156219.12	ART3	NA	NA	NA	NA	NA	NA
ENSG00000156395.8	SORCS3	NA	NA	NA	NA	NA	NA
ENSG00000156427.7	FGF18	NA	NA	NA	NA	2.16586	3.56778e-06
ENSG00000156463.13	SH3RF2	NA	NA	NA	NA	NA	NA
ENSG00000156475.14	PPP2R2B	NA	NA	NA	NA	NA	NA
ENSG00000156500.10	FAM122C	NA	NA	NA	NA	1.23072	6.59442e-45
ENSG00000156509.9	FBXO43	NA	NA	NA	NA	NA	NA
ENSG00000156535.9	CD109	NA	NA	NA	NA	NA	NA
ENSG00000156574.5	NODAL	NA	NA	NA	NA	1.31201	0.000142503
ENSG00000156689.2	GLYATL2	NA	NA	NA	NA	-1.83699	0.000255377
ENSG00000156804.3	FBXO32	NA	NA	NA	NA	NA	NA
ENSG00000157103.6	SLC6A1	NA	NA	NA	NA	NA	NA
ENSG00000157150.4	TIMP4	NA	NA	NA	NA	NA	NA
ENSG00000157168.14	NRG1	NA	NA	NA	NA	-2.5659	4.55714e-74
ENSG00000157193.10	LRP8	NA	NA	NA	NA	NA	NA
ENSG00000157219.3	HTR5A	NA	NA	NA	NA	-5.84007	0.000303502
ENSG00000157303.6	SUSD3	NA	NA	NA	NA	NA	NA
ENSG00000157445.10	CACNA2D3	NA	NA	NA	NA	1.37299	0.000298376
ENSG00000157502.8	MUM1L1	NA	NA	NA	NA	NA	NA
ENSG00000157510.9	AFAP1L1	NA	NA	NA	NA	1.44355	3.33341e-10
ENSG00000157551.13	KCNJ15	NA	NA	NA	NA	NA	NA
ENSG00000157554.14	ERG	NA	NA	NA	NA	NA	NA
ENSG00000157601.9	MX1	NA	NA	NA	NA	NA	NA
ENSG00000157765.7	SLC34A2	NA	NA	NA	NA	NA	NA
ENSG00000157827.15	FMNL2	NA	NA	NA	NA	1.35756	1.59185e-69
ENSG00000157833.8	GAREML	NA	NA	NA	NA	1.82874	3.21263e-63
ENSG00000157851.12	DPYSL5	NA	NA	NA	NA	NA	NA
ENSG00000157890.13	MEGF11	NA	NA	NA	NA	-1.05652	0.0355823
ENSG00000157927.12	RADIL	NA	NA	NA	NA	NA	NA
ENSG00000158008.5	EXTL1	NA	NA	NA	NA	NA	NA
ENSG00000158055.11	GRHL3	NA	NA	NA	NA	-1.66252	5.54619e-10
ENSG00000158089.10	GALNT14	NA	NA	NA	NA	NA	NA
ENSG00000158104.7	HPD	NA	NA	NA	NA	NA	NA
ENSG00000158113.8	LRRC43	NA	NA	NA	NA	NA	NA
ENSG00000158270.10	COLEC12	NA	NA	NA	NA	NA	NA
ENSG00000158352.11	SHROOM4	NA	NA	NA	NA	1.19114	3.92964e-19
ENSG00000158458.15	NRG2	NA	NA	NA	NA	-1.38885	3.68834e-09
ENSG00000158473.6	CD1D	NA	NA	NA	NA	NA	NA
ENSG00000158553.3	POM121L2	NA	NA	NA	NA	NA	NA
ENSG00000158555.10	GDPD5	NA	NA	NA	NA	1.46128	1.50142e-18
ENSG00000158578.14	ALAS2	NA	NA	NA	NA	NA	NA
ENSG00000158710.10	TAGLN2	NA	NA	NA	NA	NA	NA
ENSG00000158764.6	ITLN2	NA	NA	NA	NA	NA	NA
ENSG00000158815.6	FGF17	NA	NA	NA	NA	-1.86841	8.95307e-10
ENSG00000158816.11	VWA5B1	NA	NA	NA	NA	NA	NA
ENSG00000158825.5	CDA	NA	NA	NA	NA	NA	NA
ENSG00000158874.7	APOA2	NA	NA	NA	NA	-1.89984	1.00721e-72
ENSG00000158966.9	CACHD1	NA	NA	NA	NA	1.14178	6.58525e-54
ENSG00000159167.7	STC1	NA	NA	NA	NA	-2.26868	8.45876e-138
ENSG00000159176.9	CSRP1	NA	NA	NA	NA	NA	NA
ENSG00000159200.13	RCAN1	NA	NA	NA	NA	NA	NA
ENSG00000159216.14	RUNX1	NA	NA	NA	NA	1.93936	5.34063e-29
ENSG00000159228.8	CBR1	NA	NA	NA	NA	1.40996	1.43352e-83
ENSG00000159231.5	CBR3	NA	NA	NA	NA	NA	NA
ENSG00000159251.6	ACTC1	NA	NA	NA	NA	NA	NA
ENSG00000159307.14	SCUBE1	NA	NA	NA	NA	1.62141	3.0202e-07
ENSG00000159388.5	BTG2	NA	NA	NA	NA	NA	NA
ENSG00000159433.7	STARD9	NA	NA	NA	NA	1.5254	7.52721e-36
ENSG00000159625.10	CCDC135	NA	NA	NA	NA	NA	NA
ENSG00000159640.10	ACE	NA	NA	NA	NA	NA	NA
ENSG00000159674.7	SPON2	NA	NA	NA	NA	NA	NA
ENSG00000159713.6	TPPP3	NA	NA	NA	NA	NA	NA
ENSG00000159733.9	ZFYVE28	NA	NA	NA	NA	1.49572	5.86324e-05
ENSG00000159958.3	TNFRSF13C	NA	NA	NA	NA	NA	NA
ENSG00000160097.11	FNDC5	NA	NA	NA	NA	NA	NA
ENSG00000160111.8	CPAMD8	NA	NA	NA	NA	NA	NA
ENSG00000160179.14	ABCG1	NA	NA	NA	NA	NA	NA
ENSG00000160182.2	TFF1	NA	NA	NA	NA	-4.24659	0.0220692
ENSG00000160188.5	RSPH1	NA	NA	NA	NA	-1.30027	8.20634e-06
ENSG00000160282.9	FTCD	NA	NA	NA	NA	NA	NA
ENSG00000160539.4	PPAPDC3	NA	NA	NA	NA	NA	NA
ENSG00000160712.8	IL6R	NA	NA	NA	NA	4.50329	0
ENSG00000160785.9	SLC25A44	NA	NA	NA	NA	1.08847	1.39343e-44
ENSG00000160801.9	PTH1R	NA	NA	NA	NA	NA	NA
ENSG00000160808.5	MYL3	NA	NA	NA	NA	NA	NA
ENSG00000160862.8	AZGP1	NA	NA	NA	NA	1.85177	0.020013
ENSG00000160932.6	LY6E	NA	NA	NA	NA	-1.04398	3.12704e-47
ENSG00000161132.6	XXbac-B444P24.10	NA	NA	NA	NA	2.28636	0.000926708
ENSG00000161149.7	TUBA3FP	NA	NA	NA	NA	-1.67873	6.51025e-09
ENSG00000161326.8	DUSP14	NA	NA	NA	NA	1.57611	2.34911e-65
ENSG00000161328.10	LRRC56	NA	NA	NA	NA	NA	NA
ENSG00000161638.6	ITGA5	NA	NA	NA	NA	NA	NA
ENSG00000161681.11	SHANK1	NA	NA	NA	NA	NA	NA
ENSG00000161682.10	FAM171A2	NA	NA	NA	NA	NA	NA
ENSG00000161905.8	ALOX15	NA	NA	NA	NA	NA	NA
ENSG00000161944.12	ASGR2	NA	NA	NA	NA	NA	NA
ENSG00000162009.7	SSTR5	NA	NA	NA	NA	-2.68293	7.73082e-13
ENSG00000162104.5	ADCY9	NA	NA	NA	NA	1.14987	3.34363e-11
ENSG00000162188.5	GNG3	NA	NA	NA	NA	NA	NA
ENSG00000162344.3	FGF19	NA	NA	NA	NA	NA	NA
ENSG00000162374.12	ELAVL4	NA	NA	NA	NA	NA	NA
ENSG00000162407.8	PPAP2B	NA	NA	NA	NA	-1.05188	1.62634e-37
ENSG00000162426.10	SLC45A1	NA	NA	NA	NA	NA	NA
ENSG00000162433.10	AK4	NA	NA	NA	NA	NA	NA
ENSG00000162493.12	PDPN	NA	NA	NA	NA	1.15864	5.41696e-64
ENSG00000162496.4	DHRS3	NA	NA	NA	NA	-1.5378	6.43733e-10
ENSG00000162511.7	LAPTM5	NA	NA	NA	NA	1.43935	0.00243273
ENSG00000162512.11	SDC3	NA	NA	NA	NA	NA	NA
ENSG00000162545.5	CAMK2N1	NA	NA	NA	NA	1.14078	2.46e-29
ENSG00000162572.15	SCNN1D	NA	NA	NA	NA	NA	NA
ENSG00000162576.12	MXRA8	NA	NA	NA	NA	NA	NA
ENSG00000162599.11	NFIA	NA	NA	NA	NA	2.56955	9.71701e-54
ENSG00000162601.5	MYSM1	NA	NA	NA	NA	1.00913	4.2354e-52
ENSG00000162618.8	ELTD1	NA	NA	NA	NA	NA	NA
ENSG00000162641.14	AKNAD1	NA	NA	NA	NA	NA	NA
ENSG00000162654.8	GBP4	NA	NA	NA	NA	-3.94474	1.54009e-15
ENSG00000162692.6	VCAM1	NA	NA	NA	NA	NA	NA
ENSG00000162772.12	ATF3	NA	NA	NA	NA	1.06116	1.40851e-14
ENSG00000162804.9	SNED1	NA	NA	NA	NA	NA	NA
ENSG00000162814.6	SPATA17	NA	NA	NA	NA	-1.53176	1.83941e-09
ENSG00000162849.11	KIF26B	NA	NA	NA	NA	-1.42233	2.57347e-34
ENSG00000162869.11	PPP1R21	NA	NA	NA	NA	1.35285	5.01377e-71
ENSG00000162878.8	PKDCC	NA	NA	NA	NA	-2.86122	3.404e-162
ENSG00000162944.6	RFTN2	NA	NA	NA	NA	NA	NA
ENSG00000162951.6	LRRTM1	NA	NA	NA	NA	-7.67919	1.2203e-08
ENSG00000162975.3	KCNF1	NA	NA	NA	NA	-1.57903	1.8442e-10
ENSG00000163009.4	C2orf48	NA	NA	NA	NA	NA	NA
ENSG00000163017.9	ACTG2	NA	NA	NA	NA	NA	NA
ENSG00000163032.7	VSNL1	NA	NA	NA	NA	NA	NA
ENSG00000163071.6	SPATA18	NA	NA	NA	NA	NA	NA
ENSG00000163072.10	NOSTRIN	NA	NA	NA	NA	NA	NA
ENSG00000163075.8	PCDP1	NA	NA	NA	NA	-1.02282	9.89664e-09
ENSG00000163082.9	SGPP2	NA	NA	NA	NA	NA	NA
ENSG00000163191.5	S100A11	NA	NA	NA	NA	NA	NA
ENSG00000163251.3	FZD5	NA	NA	NA	NA	-1.67804	9.04592e-160
ENSG00000163328.9	GPR155	NA	NA	NA	NA	1.30058	2.99126e-05
ENSG00000163354.10	DCST2	NA	NA	NA	NA	NA	NA
ENSG00000163359.11	COL6A3	NA	NA	NA	NA	NA	NA
ENSG00000163376.7	KBTBD8	NA	NA	NA	NA	1.00728	8.82546e-27
ENSG00000163377.10	FAM19A4	NA	NA	NA	NA	NA	NA
ENSG00000163386.16	NBPF10	NA	NA	NA	NA	1.01426	1.47815e-07
ENSG00000163412.8	EIF4E3	NA	NA	NA	NA	NA	NA
ENSG00000163421.4	PROK2	NA	NA	NA	NA	NA	NA
ENSG00000163435.11	ELF3	NA	NA	NA	NA	NA	NA
ENSG00000163453.7	IGFBP7	NA	NA	NA	NA	NA	NA
ENSG00000163485.11	ADORA1	NA	NA	NA	NA	-1.23247	2.52319e-06
ENSG00000163492.9	CCDC141	NA	NA	NA	NA	-2.64467	3.41213e-103
ENSG00000163499.7	CRYBA2	NA	NA	NA	NA	-2.84391	0.0357818
ENSG00000163501.6	IHH	NA	NA	NA	NA	-1.49948	2.26833e-08
ENSG00000163508.8	EOMES	NA	NA	NA	NA	-1.38444	8.63354e-38
ENSG00000163520.9	FBLN2	NA	NA	NA	NA	-1.09339	1.09975e-48
ENSG00000163528.8	CHCHD4	NA	NA	NA	NA	1.00213	3.40097e-29
ENSG00000163531.11	NFASC	NA	NA	NA	NA	NA	NA
ENSG00000163536.8	SERPINI1	NA	NA	NA	NA	-1.27579	1.11578e-29
ENSG00000163565.14	IFI16	NA	NA	NA	NA	NA	NA
ENSG00000163576.13	EFHB	NA	NA	NA	NA	NA	NA
ENSG00000163586.5	FABP1	NA	NA	NA	NA	NA	NA
ENSG00000163590.9	PPM1L	NA	NA	NA	NA	NA	NA
ENSG00000163606.6	CD200R1	NA	NA	NA	NA	-1.33986	0.0411125
ENSG00000163618.13	CADPS	NA	NA	NA	NA	NA	NA
ENSG00000163629.8	PTPN13	NA	NA	NA	NA	-1.13587	2.64517e-39
ENSG00000163673.6	DCLK3	NA	NA	1.49777	2.03866e-07	2.82232	1.50045e-223
ENSG00000163710.3	PCOLCE2	NA	NA	NA	NA	NA	NA
ENSG00000163734.4	CXCL3	NA	NA	NA	NA	NA	NA
ENSG00000163735.6	CXCL5	NA	NA	NA	NA	NA	NA
ENSG00000163762.2	TM4SF18	NA	NA	NA	NA	NA	NA
ENSG00000163823.3	CCR1	NA	NA	NA	NA	3.41209	0.000778917
ENSG00000163873.5	GRIK3	NA	NA	NA	NA	-5.59605	9.27342e-188
ENSG00000163888.3	CAMK2N2	NA	NA	NA	NA	NA	NA
ENSG00000163898.5	LIPH	NA	NA	NA	NA	1.1831	1.92794e-17
ENSG00000164023.10	SGMS2	NA	NA	NA	NA	NA	NA
ENSG00000164089.4	ETNPPL	NA	NA	NA	NA	-1.42478	4.21451e-10
ENSG00000164093.11	PITX2	NA	NA	NA	NA	1.11966	2.3674e-40
ENSG00000164099.3	PRSS12	NA	NA	NA	NA	NA	NA
ENSG00000164116.12	GUCY1A3	NA	NA	NA	NA	-2.44827	0.0060924
ENSG00000164120.9	HPGD	NA	NA	NA	NA	NA	NA
ENSG00000164122.4	ASB5	NA	NA	NA	NA	-1.54067	0.000307443
ENSG00000164125.11	FAM198B	NA	NA	NA	NA	-1.70303	2.94249e-30
ENSG00000164136.12	IL15	NA	NA	NA	NA	NA	NA
ENSG00000164161.5	HHIP	NA	NA	NA	NA	1.76971	1.9831e-48
ENSG00000164171.6	ITGA2	NA	NA	NA	NA	NA	NA
ENSG00000164176.8	EDIL3	NA	NA	NA	NA	NA	NA
ENSG00000164187.6	LMBRD2	NA	NA	NA	NA	NA	NA
ENSG00000164265.4	SCGB3A2	NA	NA	NA	NA	NA	NA
ENSG00000164318.13	EGFLAM	NA	NA	NA	NA	NA	NA
ENSG00000164344.11	KLKB1	NA	NA	NA	NA	NA	NA
ENSG00000164379.4	FOXQ1	NA	NA	NA	NA	NA	NA
ENSG00000164393.4	GPR111	NA	NA	NA	NA	2.0501	2.10023e-20
ENSG00000164398.8	ACSL6	NA	NA	NA	NA	NA	NA
ENSG00000164418.15	GRIK2	NA	NA	NA	NA	NA	NA
ENSG00000164434.7	FABP7	NA	NA	NA	NA	-1.4068	3.85467e-12
ENSG00000164451.9	FAM26D	NA	NA	NA	NA	6.86881	6.18227e-23
ENSG00000164458.5	T	NA	NA	NA	NA	-2.76467	3.8202e-12
ENSG00000164483.12	SAMD3	NA	NA	NA	NA	-2.21246	1.6474e-73
ENSG00000164488.7	DACT2	NA	NA	-1.01736	2.93091e-13	-2.17523	9.1481e-29
ENSG00000164532.10	TBX20	NA	NA	NA	NA	-3.84972	2.26591e-16
ENSG00000164588.4	HCN1	NA	NA	NA	NA	-3.69142	2.62099e-121
ENSG00000164591.9	MYOZ3	NA	NA	NA	NA	NA	NA
ENSG00000164619.4	BMPER	NA	NA	-1.56802	9.42777e-11	-5.06715	0
ENSG00000164626.8	KCNK5	NA	NA	NA	NA	-1.04607	5.16137e-43
ENSG00000164647.4	STEAP1	NA	NA	NA	NA	NA	NA
ENSG00000164649.15	CDCA7L	NA	NA	NA	NA	NA	NA
ENSG00000164651.12	SP8	NA	NA	NA	NA	-1.92095	1.29029e-07
ENSG00000164674.11	SYTL3	NA	NA	NA	NA	-1.01912	0.0364925
ENSG00000164683.12	HEY1	NA	NA	NA	NA	1.98034	2.93232e-30
ENSG00000164687.6	FABP5	NA	NA	NA	NA	NA	NA
ENSG00000164692.13	COL1A2	NA	NA	NA	NA	NA	NA
ENSG00000164707.11	SLC13A4	NA	NA	NA	NA	-1.375	8.54876e-13
ENSG00000164741.10	DLC1	NA	NA	NA	NA	-1.11452	7.98233e-53
ENSG00000164743.4	C8orf48	NA	NA	NA	NA	-1.05863	3.60033e-05
ENSG00000164746.9	C7orf57	NA	NA	NA	NA	NA	NA
ENSG00000164761.4	TNFRSF11B	NA	NA	NA	NA	-1.00509	1.11153e-13
ENSG00000164764.10	SBSPON	NA	NA	NA	NA	NA	NA
ENSG00000164794.4	KCNV1	NA	NA	NA	NA	1.72201	2.2047e-71
ENSG00000164796.13	CSMD3	NA	NA	NA	NA	-1.37013	1.72623e-25
ENSG00000164825.3	DEFB1	NA	NA	NA	NA	4.97964	1.0991e-16
ENSG00000164845.12	FAM86FP	NA	NA	NA	NA	NA	NA
ENSG00000165029.11	ABCA1	NA	NA	NA	NA	NA	NA
ENSG00000165072.9	MAMDC2	NA	NA	NA	NA	NA	NA
ENSG00000165092.8	ALDH1A1	NA	NA	NA	NA	NA	NA
ENSG00000165140.5	FBP1	NA	NA	NA	NA	1.95292	4.46427e-28
ENSG00000165169.6	DYNLT3	NA	NA	NA	NA	1.10695	5.15342e-29
ENSG00000165171.6	WBSCR27	NA	NA	NA	NA	NA	NA
ENSG00000165188.9	RNF183	NA	NA	NA	NA	NA	NA
ENSG00000165272.10	AQP3	NA	NA	NA	NA	-1.21906	5.5214e-08
ENSG00000165300.6	SLITRK5	NA	NA	NA	NA	NA	NA
ENSG00000165309.9	ARMC3	NA	NA	NA	NA	-2.26264	8.09133e-09
ENSG00000165409.11	TSHR	NA	NA	1.16424	5.12389e-05	NA	NA
ENSG00000165507.8	C10orf10	NA	NA	NA	NA	1.6661	8.29158e-22
ENSG00000165521.11	EML5	NA	NA	NA	NA	-1.34911	7.15375e-11
ENSG00000165617.10	DACT1	NA	NA	NA	NA	NA	NA
ENSG00000165621.4	OXGR1	NA	NA	NA	NA	-2.95087	4.14565e-12
ENSG00000165646.7	SLC18A2	NA	NA	NA	NA	2.13069	2.97407e-15
ENSG00000165659.12	DACH1	NA	NA	NA	NA	1.73079	8.51872e-22
ENSG00000165731.13	RET	NA	NA	NA	NA	NA	NA
ENSG00000165794.5	SLC39A2	NA	NA	NA	NA	-2.12643	0.0488244
ENSG00000165862.10	PNLIPRP2	NA	NA	NA	NA	-2.03399	4.18485e-08
ENSG00000165899.6	OTOGL	NA	NA	NA	NA	-1.43461	3.17648e-27
ENSG00000165966.10	PDZRN4	NA	NA	NA	NA	-2.24987	1.40654e-08
ENSG00000165972.8	CCDC38	NA	NA	NA	NA	NA	NA
ENSG00000165985.8	C1QL3	NA	NA	NA	NA	NA	NA
ENSG00000166025.13	AMOTL1	NA	NA	NA	NA	NA	NA
ENSG00000166035.6	LIPC	NA	NA	NA	NA	2.67759	0.00631244
ENSG00000166073.4	GPR176	NA	NA	NA	NA	NA	NA
ENSG00000166091.15	CMTM5	NA	NA	NA	NA	NA	NA
ENSG00000166105.11	GLB1L3	NA	NA	NA	NA	NA	NA
ENSG00000166106.2	ADAMTS15	NA	NA	NA	NA	NA	NA
ENSG00000166126.6	AMN	NA	NA	NA	NA	NA	NA
ENSG00000166147.9	FBN1	NA	NA	NA	NA	NA	NA
ENSG00000166183.11	ASPG	NA	NA	NA	NA	NA	NA
ENSG00000166257.4	SCN3B	NA	NA	NA	NA	NA	NA
ENSG00000166292.7	TMEM100	NA	NA	NA	NA	NA	NA
ENSG00000166394.10	CYB5R2	NA	NA	NA	NA	1.11262	2.4e-38
ENSG00000166426.7	CRABP1	NA	NA	NA	NA	NA	NA
ENSG00000166482.7	MFAP4	NA	NA	NA	NA	NA	NA
ENSG00000166501.8	PRKCB	NA	NA	NA	NA	NA	NA
ENSG00000166510.9	CCDC68	NA	NA	NA	NA	NA	NA
ENSG00000166578.5	IQCD	NA	NA	NA	NA	NA	NA
ENSG00000166689.10	PLEKHA7	NA	NA	NA	NA	NA	NA
ENSG00000166736.7	HTR3A	NA	NA	NA	NA	NA	NA
ENSG00000166762.12	CATSPER2	NA	NA	NA	NA	1.21977	0.00868618
ENSG00000166828.2	SCNN1G	NA	NA	NA	NA	NA	NA
ENSG00000166847.5	DCTN5	NA	NA	NA	NA	1.05297	3.206e-57
ENSG00000166863.7	TAC3	NA	NA	NA	NA	NA	NA
ENSG00000166923.6	GREM1	NA	NA	NA	NA	3.28745	2.96828e-21
ENSG00000166949.11	SMAD3	NA	NA	NA	NA	1.4164	2.64906e-21
ENSG00000166963.8	MAP1A	NA	NA	NA	NA	NA	NA
ENSG00000166979.8	EVA1C	NA	NA	NA	NA	NA	NA
ENSG00000167083.2	GNGT2	NA	NA	NA	NA	NA	NA
ENSG00000167123.14	CERCAM	NA	NA	NA	NA	NA	NA
ENSG00000167191.7	GPRC5B	NA	NA	NA	NA	1.37368	2.3051e-77
ENSG00000167244.13	IGF2	NA	NA	NA	NA	NA	NA
ENSG00000167286.5	CD3D	NA	NA	NA	NA	1.65861	0.00618957
ENSG00000167355.3	AC104389.28	NA	NA	NA	NA	NA	NA
ENSG00000167360.4	OR51Q1	NA	NA	NA	NA	-3.61062	0.00120694
ENSG00000167434.5	CA4	NA	NA	NA	NA	-1.79229	0.0286986
ENSG00000167552.9	TUBA1A	NA	NA	NA	NA	1.35394	7.53548e-82
ENSG00000167588.8	GPD1	NA	NA	NA	NA	NA	NA
ENSG00000167600.9	CYP2S1	NA	NA	NA	NA	NA	NA
ENSG00000167614.9	TTYH1	NA	NA	NA	NA	2.11777	6.30166e-22
ENSG00000167654.13	ATCAY	NA	NA	NA	NA	1.39594	5.48851e-12
ENSG00000167680.11	SEMA6B	NA	NA	NA	NA	NA	NA
ENSG00000167711.9	SERPINF2	NA	NA	NA	NA	NA	NA
ENSG00000167754.8	KLK5	NA	NA	NA	NA	NA	NA
ENSG00000167755.9	KLK6	NA	NA	NA	NA	NA	NA
ENSG00000167757.9	KLK11	NA	NA	NA	NA	NA	NA
ENSG00000167779.3	IGFBP6	NA	NA	NA	NA	NA	NA
ENSG00000167780.7	SOAT2	NA	NA	NA	NA	NA	NA
ENSG00000167861.11	HID1	NA	NA	NA	NA	1.09123	1.38362e-28
ENSG00000167874.6	TMEM88	NA	NA	NA	NA	NA	NA
ENSG00000167964.8	RAB26	NA	NA	NA	NA	NA	NA
ENSG00000167995.11	BEST1	NA	NA	NA	NA	NA	NA
ENSG00000168010.6	ATG16L2	NA	NA	NA	NA	NA	NA
ENSG00000168032.4	ENTPD3	NA	NA	NA	NA	NA	NA
ENSG00000168140.4	VASN	NA	NA	NA	NA	-1.51641	7.6235e-38
ENSG00000168234.8	TTC39C	NA	NA	NA	NA	NA	NA
ENSG00000168237.13	GLYCTK	NA	NA	NA	NA	NA	NA
ENSG00000168269.7	FOXI1	NA	NA	NA	NA	NA	NA
ENSG00000168306.8	ACOX2	NA	NA	NA	NA	NA	NA
ENSG00000168314.13	MOBP	NA	NA	NA	NA	1.76786	5.3107e-51
ENSG00000168386.14	FILIP1L	NA	NA	NA	NA	NA	NA
ENSG00000168394.9	TAP1	NA	NA	NA	NA	NA	NA
ENSG00000168398.5	BDKRB2	NA	NA	NA	NA	1.65248	6.75624e-18
ENSG00000168412.6	MTNR1A	NA	NA	NA	NA	NA	NA
ENSG00000168421.8	RHOH	NA	NA	NA	NA	NA	NA
ENSG00000168477.13	TNXB	NA	NA	NA	NA	NA	NA
ENSG00000168491.5	CCDC110	NA	NA	NA	NA	1.07743	6.25645e-09
ENSG00000168542.8	COL3A1	NA	NA	NA	NA	-2.69671	2.38618e-07
ENSG00000168589.10	DYNLRB2	NA	NA	NA	NA	NA	NA
ENSG00000168610.10	STAT3	NA	NA	NA	NA	1.41345	8.63787e-85
ENSG00000168621.10	GDNF	NA	NA	NA	NA	-1.11964	0.00322929
ENSG00000168675.14	LDLRAD4	NA	NA	NA	NA	-1.25618	5.58378e-20
ENSG00000168679.13	SLC16A4	NA	NA	NA	NA	NA	NA
ENSG00000168685.10	IL7R	NA	NA	NA	NA	1.81367	0.00222005
ENSG00000168702.12	LRP1B	NA	NA	NA	NA	-1.38737	1.18513e-22
ENSG00000168743.8	NPNT	NA	NA	NA	NA	-1.75543	7.00208e-05
ENSG00000168772.9	CXXC4	NA	NA	NA	NA	-1.16767	2.36379e-24
ENSG00000168811.2	IL12A	NA	NA	NA	NA	3.67175	6.6025e-20
ENSG00000168830.6	HTR1E	NA	NA	NA	NA	-1.73507	4.1402e-07
ENSG00000168843.9	FSTL5	NA	NA	NA	NA	NA	NA
ENSG00000168874.8	ATOH8	NA	NA	NA	NA	-1.76117	4.1542e-05
ENSG00000168875.1	SOX14	NA	NA	NA	NA	5.02677	0.00015651
ENSG00000168917.8	SLC35G2	NA	NA	NA	NA	NA	NA
ENSG00000168918.9	INPP5D	NA	NA	NA	NA	NA	NA
ENSG00000168952.11	STXBP6	NA	NA	NA	NA	NA	NA
ENSG00000168993.10	CPLX1	NA	NA	NA	NA	NA	NA
ENSG00000169031.14	COL4A3	NA	NA	NA	NA	1.30302	3.42299e-19
ENSG00000169116.7	PARM1	NA	NA	NA	NA	1.59019	2.58091e-18
ENSG00000169174.9	PCSK9	NA	NA	NA	NA	-2.48389	3.835e-134
ENSG00000169184.5	MN1	NA	NA	NA	NA	NA	NA
ENSG00000169213.6	RAB3B	NA	NA	NA	NA	1.57637	3.45511e-94
ENSG00000169291.5	SHE	NA	NA	NA	NA	1.35352	0.000127147
ENSG00000169297.6	NR0B1	NA	NA	NA	NA	-4.77887	2.14234e-48
ENSG00000169314.10	C22orf15	NA	NA	NA	NA	NA	NA
ENSG00000169379.11	ARL13B	NA	NA	NA	NA	-1.1209	6.67325e-31
ENSG00000169418.9	NPR1	NA	NA	NA	NA	NA	NA
ENSG00000169432.10	SCN9A	NA	NA	NA	NA	1.25838	6.68463e-07
ENSG00000169435.9	RASSF6	NA	NA	NA	NA	-2.42566	1.19292e-30
ENSG00000169442.4	CD52	NA	NA	NA	NA	NA	NA
ENSG00000169507.5	SLC38A11	NA	NA	NA	NA	NA	NA
ENSG00000169548.3	ZNF280A	NA	NA	NA	NA	-1.41311	0.0030537
ENSG00000169562.9	GJB1	NA	NA	NA	NA	NA	NA
ENSG00000169676.4	DRD5	NA	NA	NA	NA	1.47989	0.0351881
ENSG00000169715.10	MT1E	NA	NA	NA	NA	2.18918	9.92613e-05
ENSG00000169752.12	NRG4	NA	NA	NA	NA	2.18925	1.58555e-23
ENSG00000169758.8	C15orf27	NA	NA	NA	NA	1.85729	3.73308e-49
ENSG00000169836.4	TACR3	NA	NA	NA	NA	NA	NA
ENSG00000169896.12	ITGAM	NA	NA	NA	NA	1.10887	0.000387888
ENSG00000169908.6	TM4SF1	NA	NA	NA	NA	NA	NA
ENSG00000169933.8	FRMPD4	NA	NA	NA	NA	NA	NA
ENSG00000169946.9	ZFPM2	NA	NA	NA	NA	-4.75854	5.05749e-19
ENSG00000170011.9	MYRIP	NA	NA	NA	NA	NA	NA
ENSG00000170214.3	ADRA1B	NA	NA	NA	NA	-1.68289	0.0388779
ENSG00000170231.11	FABP6	NA	NA	NA	NA	NA	NA
ENSG00000170236.10	USP50	NA	NA	NA	NA	-1.16906	0.00789564
ENSG00000170324.15	FRMPD2	NA	NA	NA	NA	1.79063	3.57887e-08
ENSG00000170345.5	FOS	1.01836	0.000144182	NA	NA	NA	NA
ENSG00000170373.4	CST1	NA	NA	NA	NA	-1.09422	1.80334e-35
ENSG00000170381.8	SEMA3E	NA	NA	NA	NA	-3.185	0
ENSG00000170439.5	METTL7B	NA	NA	NA	NA	-1.08338	3.78904e-09
ENSG00000170458.9	CD14	NA	NA	NA	NA	1.79941	0.00102376
ENSG00000170482.12	SLC23A1	NA	NA	NA	NA	NA	NA
ENSG00000170485.12	NPAS2	NA	NA	NA	NA	NA	NA
ENSG00000170542.5	SERPINB9	NA	NA	NA	NA	NA	NA
ENSG00000170549.3	IRX1	NA	NA	NA	NA	NA	NA
ENSG00000170561.8	IRX2	NA	NA	NA	NA	NA	NA
ENSG00000170579.10	DLGAP1	NA	NA	NA	NA	1.00096	1.72616e-20
ENSG00000170634.8	ACYP2	NA	NA	NA	NA	NA	NA
ENSG00000170786.8	SDR16C5	NA	NA	NA	NA	1.37752	0.000738514
ENSG00000170820.7	FSHR	NA	NA	NA	NA	-4.32835	1.29062e-13
ENSG00000170835.10	CEL	NA	NA	NA	NA	NA	NA
ENSG00000170893.3	TRH	NA	NA	NA	NA	NA	NA
ENSG00000170899.6	GSTA4	NA	NA	NA	NA	1.64344	8.77276e-91
ENSG00000170955.9	PRKCDBP	NA	NA	NA	NA	-1.24426	2.63794e-19
ENSG00000170961.6	HAS2	NA	NA	NA	NA	-1.88955	3.71355e-123
ENSG00000171084.11	FAM86JP	NA	NA	NA	NA	-1.01632	6.77955e-07
ENSG00000171126.7	KCNG3	NA	NA	NA	NA	NA	NA
ENSG00000171243.7	SOSTDC1	NA	NA	NA	NA	NA	NA
ENSG00000171246.5	NPTX1	NA	NA	NA	NA	NA	NA
ENSG00000171345.9	KRT19	NA	NA	NA	NA	NA	NA
ENSG00000171388.9	APLN	NA	NA	NA	NA	NA	NA
ENSG00000171451.13	DSEL	NA	NA	NA	NA	NA	NA
ENSG00000171522.5	PTGER4	NA	NA	NA	NA	2.41494	3.95292e-06
ENSG00000171533.7	MAP6	NA	NA	NA	NA	1.64679	1.1126e-39
ENSG00000171551.7	ECEL1	NA	NA	NA	NA	NA	NA
ENSG00000171557.12	FGG	NA	NA	NA	NA	NA	NA
ENSG00000171560.10	FGA	NA	NA	NA	NA	NA	NA
ENSG00000171564.7	FGB	NA	NA	NA	NA	NA	NA
ENSG00000171587.10	DSCAM	NA	NA	NA	NA	-2.16601	2.04409e-33
ENSG00000171617.9	ENC1	NA	NA	NA	NA	-1.12514	3.05364e-49
ENSG00000171643.9	S100Z	NA	NA	NA	NA	NA	NA
ENSG00000171724.2	VAT1L	NA	NA	NA	NA	NA	NA
ENSG00000171747.4	LGALS4	NA	NA	NA	NA	NA	NA
ENSG00000171759.4	PAH	NA	NA	NA	NA	NA	NA
ENSG00000171766.11	GATM	NA	NA	NA	NA	NA	NA
ENSG00000171867.12	PRNP	NA	NA	NA	NA	NA	NA
ENSG00000171885.9	AQP4	NA	NA	NA	NA	NA	NA
ENSG00000171889.3	MIR31HG	NA	NA	NA	NA	-1.48091	0.00423874
ENSG00000171951.4	SCG2	NA	NA	NA	NA	NA	NA
ENSG00000171956.5	FOXB1	NA	NA	NA	NA	NA	NA
ENSG00000171962.13	LRRC48	NA	NA	NA	NA	-1.05659	0.00199357
ENSG00000172020.8	GAP43	NA	NA	NA	NA	NA	NA
ENSG00000172116.17	CD8B	NA	NA	NA	NA	1.84915	0.0313975
ENSG00000172137.14	CALB2	NA	NA	NA	NA	NA	NA
ENSG00000172197.9	MBOAT1	NA	NA	NA	NA	1.34403	1.04401e-41
ENSG00000172201.6	ID4	NA	NA	NA	NA	NA	NA
ENSG00000172232.5	AZU1	NA	NA	NA	NA	NA	NA
ENSG00000172238.3	ATOH1	NA	NA	NA	NA	-4.76105	2.68659e-12
ENSG00000172247.3	C1QTNF4	NA	NA	NA	NA	NA	NA
ENSG00000172260.9	NEGR1	NA	NA	NA	NA	NA	NA
ENSG00000172296.8	SPTLC3	NA	NA	NA	NA	1.67238	6.0422e-20
ENSG00000172318.4	B3GALT1	NA	NA	NA	NA	NA	NA
ENSG00000172361.5	CCDC11	NA	NA	NA	NA	-1.04675	0.0141531
ENSG00000172367.11	PDZD3	NA	NA	NA	NA	NA	NA
ENSG00000172375.8	C2CD2L	NA	NA	NA	NA	1.11282	2.9924e-07
ENSG00000172575.7	RASGRP1	NA	NA	NA	NA	-2.60917	1.0841e-98
ENSG00000172663.4	TMEM134	NA	NA	NA	NA	NA	NA
ENSG00000172738.7	TMEM217	NA	NA	NA	NA	NA	NA
ENSG00000172782.7	FADS6	NA	NA	NA	NA	-1.72316	2.37337e-15
ENSG00000172794.15	RAB37	NA	NA	NA	NA	1.11851	2.49097e-24
ENSG00000172818.5	OVOL1	NA	NA	NA	NA	-2.15295	2.71765e-14
ENSG00000172965.10	MIR4435-1HG	NA	NA	NA	NA	NA	NA
ENSG00000173013.4	CCDC96	NA	NA	NA	NA	-1.34324	0.000841988
ENSG00000173068.13	BNC2	NA	NA	NA	NA	NA	NA
ENSG00000173077.10	DEC1	NA	NA	NA	NA	NA	NA
ENSG00000173088.8	C10orf131	NA	NA	NA	NA	-1.35955	0.0193754
ENSG00000173093.8	CCDC63	NA	NA	NA	NA	NA	NA
ENSG00000173114.8	LRRN3	NA	NA	NA	NA	1.0617	5.33272e-09
ENSG00000173157.12	ADAMTS20	NA	NA	NA	NA	NA	NA
ENSG00000173213.7	RP11-683L23.1	NA	NA	NA	NA	1.33852	0.0130538
ENSG00000173250.2	GPR151	NA	NA	1.23604	1.61145e-06	NA	NA
ENSG00000173262.7	SLC2A14	NA	NA	NA	NA	NA	NA
ENSG00000173269.9	MMRN2	NA	NA	NA	NA	1.06603	2.14878e-05
ENSG00000173320.5	STOX2	NA	NA	NA	NA	NA	NA
ENSG00000173376.9	NDNF	NA	NA	NA	NA	-1.2246	0.000628261
ENSG00000173391.4	OLR1	NA	NA	NA	NA	2.79937	0.000122834
ENSG00000173401.5	GLIPR1L1	NA	NA	NA	NA	NA	NA
ENSG00000173535.9	TNFRSF10C	NA	NA	NA	NA	NA	NA
ENSG00000173546.7	CSPG4	NA	NA	NA	NA	NA	NA
ENSG00000173598.9	NUDT4	NA	NA	NA	NA	-1.62759	1.05882e-147
ENSG00000173673.7	HES3	NA	NA	NA	NA	NA	NA
ENSG00000173698.13	GPR64	NA	NA	NA	NA	NA	NA
ENSG00000173705.4	SUSD5	NA	NA	NA	NA	NA	NA
ENSG00000173714.7	WFIKKN2	NA	NA	NA	NA	-1.29432	5.99465e-08
ENSG00000173762.3	CD7	NA	NA	NA	NA	-1.30618	0.0186433
ENSG00000173826.10	KCNH6	NA	NA	NA	NA	NA	NA
ENSG00000173918.10	C1QTNF1	NA	NA	NA	NA	-2.90684	1.52046e-103
ENSG00000174032.12	SLC25A30	NA	NA	NA	NA	1.0776	6.05485e-34
ENSG00000174059.12	CD34	NA	NA	NA	NA	NA	NA
ENSG00000174080.6	CTSF	NA	NA	NA	NA	-1.45723	0.00684079
ENSG00000174083.13	PIK3R6	NA	NA	NA	NA	-1.38605	0.00544859
ENSG00000174099.6	MSRB3	NA	NA	NA	NA	NA	NA
ENSG00000174156.9	GSTA3	NA	NA	NA	NA	3.17862	5.87057e-18
ENSG00000174306.17	ZHX3	NA	NA	NA	NA	1.01327	5.19952e-17
ENSG00000174307.5	PHLDA3	NA	NA	NA	NA	NA	NA
ENSG00000174332.3	GLIS1	NA	NA	NA	NA	NA	NA
ENSG00000174358.11	SLC6A19	NA	NA	NA	NA	NA	NA
ENSG00000174460.3	ZCCHC12	NA	NA	NA	NA	NA	NA
ENSG00000174469.13	CNTNAP2	NA	NA	NA	NA	NA	NA
ENSG00000174640.8	SLCO2A1	NA	NA	NA	NA	-1.56072	9.80283e-76
ENSG00000174672.11	BRSK2	NA	NA	NA	NA	NA	NA
ENSG00000174721.9	FGFBP3	NA	NA	1.19792	3.05901e-09	4.26125	0
ENSG00000174776.6	WDR49	NA	NA	NA	NA	NA	NA
ENSG00000174804.3	FZD4	NA	NA	NA	NA	NA	NA
ENSG00000174827.9	PDZK1	NA	NA	NA	NA	-1.56388	4.10757e-31
ENSG00000174899.6	C3orf55	NA	NA	NA	NA	NA	NA
ENSG00000175040.4	CHST2	NA	NA	NA	NA	NA	NA
ENSG00000175077.5	RTP1	NA	NA	NA	NA	NA	NA
ENSG00000175155.4	YPEL2	NA	NA	NA	NA	NA	NA
ENSG00000175164.9	ABO	NA	NA	NA	NA	NA	NA
ENSG00000175311.5	ANKS4B	NA	NA	NA	NA	NA	NA
ENSG00000175315.2	CST6	NA	NA	NA	NA	NA	NA
ENSG00000175329.8	ISX	NA	NA	NA	NA	NA	NA
ENSG00000175426.6	PCSK1	NA	NA	NA	NA	NA	NA
ENSG00000175592.4	FOSL1	NA	NA	NA	NA	NA	NA
ENSG00000175764.10	TTLL11	NA	NA	NA	NA	NA	NA
ENSG00000175766.7	EIF4E1B	NA	NA	NA	NA	-1.73767	1.28866e-07
ENSG00000175772.10	AC112229.7	NA	NA	NA	NA	NA	NA
ENSG00000175793.10	SFN	NA	NA	NA	NA	NA	NA
ENSG00000175832.8	ETV4	NA	NA	NA	NA	NA	NA
ENSG00000175857.4	GAPT	NA	NA	NA	NA	-3.24895	0.000590485
ENSG00000175868.9	CALCB	NA	NA	NA	NA	NA	NA
ENSG00000175874.5	CREG2	NA	NA	NA	NA	2.32676	2.07614e-09
ENSG00000175894.10	TSPEAR	NA	NA	NA	NA	-1.12957	7.34688e-13
ENSG00000175906.4	ARL4D	NA	NA	NA	NA	NA	NA
ENSG00000175920.11	DOK7	NA	NA	NA	NA	1.48856	8.65176e-05
ENSG00000175928.5	LRRN1	NA	NA	NA	NA	1.01912	2.38563e-55
ENSG00000175984.10	DENND2C	NA	NA	NA	NA	NA	NA
ENSG00000176014.8	TUBB6	NA	NA	NA	NA	NA	NA
ENSG00000176034.8	CHDC2	NA	NA	NA	NA	NA	NA
ENSG00000176125.3	UFSP1	NA	NA	NA	NA	-1.03084	0.0252326
ENSG00000176148.11	TCP11L1	NA	NA	NA	NA	1.06404	7.55694e-23
ENSG00000176153.10	GPX2	NA	NA	NA	NA	3.73423	1.78088e-145
ENSG00000176170.9	SPHK1	NA	NA	NA	NA	NA	NA
ENSG00000176204.9	LRRTM4	NA	NA	NA	NA	-1.52399	3.29594e-37
ENSG00000176244.6	ACBD7	NA	NA	NA	NA	NA	NA
ENSG00000176320.2	RP11-404O13.5	NA	NA	NA	NA	1.47235	0.00426375
ENSG00000176358.11	TAC4	NA	NA	NA	NA	1.42431	8.34611e-07
ENSG00000176383.8	B3GNT4	NA	NA	NA	NA	NA	NA
ENSG00000176402.5	GJC3	NA	NA	NA	NA	NA	NA
ENSG00000176428.5	VPS37D	NA	NA	NA	NA	NA	NA
ENSG00000176435.6	CLEC14A	NA	NA	NA	NA	NA	NA
ENSG00000176438.8	SYNE3	NA	NA	NA	NA	NA	NA
ENSG00000176463.9	SLCO3A1	NA	NA	NA	NA	NA	NA
ENSG00000176485.6	PLA2G16	NA	NA	NA	NA	1.90275	6.37527e-108
ENSG00000176532.3	PRR15	NA	NA	NA	NA	NA	NA
ENSG00000176654.8	NANOGP1	NA	NA	NA	NA	NA	NA
ENSG00000176697.14	BDNF	NA	NA	NA	NA	NA	NA
ENSG00000176783.10	RUFY1	NA	NA	NA	NA	1.01931	2.83281e-33
ENSG00000176842.10	IRX5	NA	NA	NA	NA	-1.64063	0.000137959
ENSG00000176887.5	SOX11	NA	NA	NA	NA	NA	NA
ENSG00000176907.3	C8orf4	NA	NA	NA	NA	-3.23253	4.83368e-33
ENSG00000176920.10	FUT2	NA	NA	NA	NA	-1.02054	6.79017e-06
ENSG00000176928.4	GCNT4	NA	NA	NA	NA	NA	NA
ENSG00000176956.8	LY6H	NA	NA	NA	NA	-1.59122	0.0130538
ENSG00000177103.9	DSCAML1	NA	NA	NA	NA	NA	NA
ENSG00000177106.10	EPS8L2	NA	NA	NA	NA	NA	NA
ENSG00000177181.10	RIMKLA	NA	NA	NA	NA	NA	NA
ENSG00000177182.6	CLVS1	NA	NA	NA	NA	NA	NA
ENSG00000177191.2	B3GNT8	NA	NA	NA	NA	NA	NA
ENSG00000177283.4	FZD8	NA	NA	NA	NA	-1.87621	2.59497e-87
ENSG00000177335.6	C8orf31	NA	NA	NA	NA	-1.54744	4.15499e-12
ENSG00000177337.3	DLGAP1-AS1	NA	NA	NA	NA	NA	NA
ENSG00000177359.13	RP11-551L14.1	NA	NA	NA	NA	1.31283	6.7013e-23
ENSG00000177398.14	UMODL1	NA	NA	NA	NA	-2.12629	0.00138063
ENSG00000177426.16	TGIF1	NA	NA	NA	NA	NA	NA
ENSG00000177459.6	C8orf47	NA	NA	NA	NA	NA	NA
ENSG00000177468.5	OLIG3	NA	NA	NA	NA	NA	NA
ENSG00000177469.12	PTRF	NA	NA	NA	NA	NA	NA
ENSG00000177508.11	IRX3	NA	NA	NA	NA	-2.9018	1.68924e-69
ENSG00000177519.3	RPRM	NA	NA	NA	NA	NA	NA
ENSG00000177575.8	CD163	NA	NA	NA	NA	-1.47178	3.65224e-06
ENSG00000177606.5	JUN	NA	NA	NA	NA	NA	NA
ENSG00000177764.6	ZCCHC3	NA	NA	NA	NA	NA	NA
ENSG00000177791.11	MYOZ1	NA	NA	NA	NA	NA	NA
ENSG00000177807.6	KCNJ10	NA	NA	NA	NA	NA	NA
ENSG00000177822.3	AC108142.1	NA	NA	NA	NA	NA	NA
ENSG00000177984.6	LCN15	NA	NA	NA	NA	NA	NA
ENSG00000178033.5	FAM26E	NA	NA	1.76449	3.24811e-10	4.59247	4.39809e-242
ENSG00000178125.10	PPP1R42	NA	NA	NA	NA	-2.27592	0.0285344
ENSG00000178171.6	AMER3	NA	NA	NA	NA	-1.7662	5.08954e-11
ENSG00000178222.8	RNF212	NA	NA	NA	NA	1.03272	0.00459594
ENSG00000178297.8	TMPRSS9	NA	NA	NA	NA	-1.28441	0.000614128
ENSG00000178343.4	SHISA3	NA	NA	NA	NA	-1.23292	4.09146e-21
ENSG00000178401.10	DNAJC22	NA	NA	NA	NA	NA	NA
ENSG00000178522.10	AMBN	NA	NA	NA	NA	NA	NA
ENSG00000178538.5	CA8	NA	NA	NA	NA	1.12844	6.58405e-08
ENSG00000178568.9	ERBB4	NA	NA	NA	NA	-3.74063	7.90963e-67
ENSG00000178573.6	MAF	NA	NA	NA	NA	NA	NA
ENSG00000178631.7	ACTG1P1	NA	NA	NA	NA	NA	NA
ENSG00000178695.4	KCTD12	NA	NA	NA	NA	NA	NA
ENSG00000178726.6	THBD	NA	NA	NA	NA	NA	NA
ENSG00000178803.6	ADORA2A-AS1	NA	NA	NA	NA	NA	NA
ENSG00000178814.11	OPLAH	NA	NA	NA	NA	NA	NA
ENSG00000178826.6	TMEM139	NA	NA	NA	NA	NA	NA
ENSG00000178860.8	MSC	NA	NA	NA	NA	3.18421	1.07632e-45
ENSG00000179046.4	TRIML2	NA	NA	NA	NA	NA	NA
ENSG00000179057.9	IGSF22	NA	NA	NA	NA	NA	NA
ENSG00000179242.11	CDH4	NA	NA	NA	NA	NA	NA
ENSG00000179314.9	WSCD1	NA	NA	NA	NA	NA	NA
ENSG00000179388.8	EGR3	NA	NA	NA	NA	NA	NA
ENSG00000179431.5	FJX1	NA	NA	NA	NA	-1.60618	8.73718e-31
ENSG00000179477.5	ALOX12B	NA	NA	NA	NA	NA	NA
ENSG00000179520.6	SLC17A8	NA	NA	NA	NA	NA	NA
ENSG00000179546.3	HTR1D	NA	NA	NA	NA	NA	NA
ENSG00000179577.2	AP003471.1	NA	NA	NA	NA	NA	NA
ENSG00000179588.4	ZFPM1	NA	NA	NA	NA	NA	NA
ENSG00000179636.10	TPPP2	NA	NA	NA	NA	NA	NA
ENSG00000179750.11	APOBEC3B	NA	NA	NA	NA	NA	NA
ENSG00000179761.7	PIPOX	NA	NA	NA	NA	NA	NA
ENSG00000179774.7	ATOH7	NA	NA	NA	NA	NA	NA
ENSG00000179776.13	CDH5	NA	NA	NA	NA	4.52433	2.23316e-54
ENSG00000179799.7	OR7E22P	NA	NA	NA	NA	1.53679	0.000292462
ENSG00000179855.5	GIPC3	NA	NA	NA	NA	NA	NA
ENSG00000179914.4	ITLN1	NA	NA	NA	NA	NA	NA
ENSG00000179915.16	NRXN1	NA	NA	NA	NA	NA	NA
ENSG00000179981.9	TSHZ1	NA	NA	NA	NA	NA	NA
ENSG00000180008.8	SOCS4	NA	NA	NA	NA	1.29398	1.40265e-47
ENSG00000180011.6	ZADH2	NA	NA	NA	NA	NA	NA
ENSG00000180061.5	TMEM150B	NA	NA	NA	NA	NA	NA
ENSG00000180066.5	C10orf91	NA	NA	NA	NA	-1.88714	0.000603325
ENSG00000180071.14	ANKRD18A	NA	NA	NA	NA	NA	NA
ENSG00000180155.14	LYNX1	NA	NA	NA	NA	NA	NA
ENSG00000180209.7	MYLPF	NA	NA	NA	NA	NA	NA
ENSG00000180210.10	F2	NA	NA	NA	NA	NA	NA
ENSG00000180347.9	CCDC129	NA	NA	NA	NA	-2.15914	5.77351e-21
ENSG00000180438.10	TPRXL	NA	NA	NA	NA	1.18969	0.000263414
ENSG00000180447.5	GAS1	NA	NA	NA	NA	NA	NA
ENSG00000180672.4	AC007362.1	NA	NA	NA	NA	1.01193	0.00509619
ENSG00000180694.9	TMEM64	NA	NA	NA	NA	2.32883	4.33995e-163
ENSG00000180730.4	SHISA2	NA	NA	NA	NA	-2.7265	4.77338e-293
ENSG00000180739.12	S1PR5	NA	NA	NA	NA	NA	NA
ENSG00000180815.10	MAP3K15	NA	NA	NA	NA	1.11311	1.98391e-13
ENSG00000180828.1	BHLHE22	NA	NA	NA	NA	NA	NA
ENSG00000180861.5	C12orf36	NA	NA	NA	NA	-7.00558	8.4647e-07
ENSG00000180875.4	GREM2	NA	NA	1.21103	2.74843e-20	1.93587	3.43778e-65
ENSG00000180914.6	OXTR	NA	NA	1.12287	3.28596e-19	NA	NA
ENSG00000181019.8	NQO1	NA	NA	NA	NA	NA	NA
ENSG00000181195.6	PENK	NA	NA	NA	NA	NA	NA
ENSG00000181234.8	TMEM132C	NA	NA	NA	NA	NA	NA
ENSG00000181322.9	NME9	NA	NA	NA	NA	-1.50387	0.0101691
ENSG00000181359.5	HSP90AA6P	NA	NA	NA	NA	NA	NA
ENSG00000181378.9	CCDC108	NA	NA	NA	NA	-1.66907	1.48961e-06
ENSG00000181449.2	SOX2	NA	NA	NA	NA	NA	NA
ENSG00000181577.11	C6orf223	NA	NA	NA	NA	NA	NA
ENSG00000181585.3	TMIE	NA	NA	NA	NA	NA	NA
ENSG00000181649.5	PHLDA2	NA	NA	NA	NA	NA	NA
ENSG00000181773.6	GPR3	NA	NA	NA	NA	NA	NA
ENSG00000181788.3	SIAH2	NA	NA	NA	NA	1.19304	1.62408e-29
ENSG00000181804.10	SLC9A9	NA	NA	NA	NA	NA	NA
ENSG00000182050.9	MGAT4C	NA	NA	NA	NA	NA	NA
ENSG00000182070.4	OR52A1	NA	NA	NA	NA	NA	NA
ENSG00000182118.5	FAM89A	NA	NA	NA	NA	NA	NA
ENSG00000182168.10	UNC5C	NA	NA	NA	NA	-1.4297	1.59675e-11
ENSG00000182183.10	FAM159A	NA	NA	NA	NA	-1.30395	0.00715978
ENSG00000182218.5	HHIPL1	NA	NA	NA	NA	NA	NA
ENSG00000182230.7	FAM153B	NA	NA	NA	NA	NA	NA
ENSG00000182253.10	SYNM	NA	NA	NA	NA	1.34952	6.50012e-07
ENSG00000182264.4	IZUMO1	NA	NA	NA	NA	NA	NA
ENSG00000182319.5	SGK223	NA	NA	NA	NA	-1.09337	7.66554e-19
ENSG00000182372.6	CLN8	NA	NA	NA	NA	1.11874	3.93599e-33
ENSG00000182379.9	NXPH4	NA	NA	NA	NA	-4.02929	0.0398068
ENSG00000182575.7	NXPH3	NA	NA	NA	NA	NA	NA
ENSG00000182580.2	EPHB3	NA	NA	NA	NA	NA	NA
ENSG00000182670.9	TTC3	NA	NA	NA	NA	NA	NA
ENSG00000182718.12	ANXA2	NA	NA	NA	NA	NA	NA
ENSG00000182732.12	RGS6	NA	NA	NA	NA	NA	NA
ENSG00000182795.12	C1orf116	NA	NA	NA	NA	NA	NA
ENSG00000182836.5	PLCXD3	NA	NA	NA	NA	-2.19599	5.41433e-187
ENSG00000182866.12	LCK	NA	NA	NA	NA	NA	NA
ENSG00000182871.10	COL18A1	NA	NA	NA	NA	NA	NA
ENSG00000182902.9	SLC25A18	NA	NA	NA	NA	-1.72634	8.01403e-30
ENSG00000183049.8	CAMK1D	NA	NA	NA	NA	NA	NA
ENSG00000183091.15	NEB	NA	NA	NA	NA	-1.20381	2.32421e-17
ENSG00000183114.6	FAM43B	NA	NA	NA	NA	1.5784	0.0492559
ENSG00000183117.13	CSMD1	NA	NA	NA	NA	NA	NA
ENSG00000183230.12	CTNNA3	NA	NA	NA	NA	NA	NA
ENSG00000183242.7	WT1-AS	NA	NA	-1.08264	0.00580763	-3.18684	7.13783e-06
ENSG00000183251.3	OR51B4	NA	NA	NA	NA	NA	NA
ENSG00000183287.9	CCBE1	NA	NA	2.27222	4.45785e-17	NA	NA
ENSG00000183323.8	CCDC125	NA	NA	NA	NA	NA	NA
ENSG00000183346.6	C10orf107	NA	NA	NA	NA	-3.60359	4.84098e-08
ENSG00000183378.7	OVCH2	NA	NA	NA	NA	1.16699	1.9278e-11
ENSG00000183379.4	SYNDIG1L	NA	NA	NA	NA	-1.15743	1.82949e-07
ENSG00000183423.7	LRIT3	NA	NA	NA	NA	2.42887	7.96713e-54
ENSG00000183454.9	GRIN2A	NA	NA	NA	NA	-1.16261	4.45226e-05
ENSG00000183496.5	MEX3B	NA	NA	NA	NA	2.37586	4.94604e-126
ENSG00000183569.13	SERHL2	NA	NA	NA	NA	NA	NA
ENSG00000183644.9	C11orf88	NA	NA	NA	NA	NA	NA
ENSG00000183682.7	BMP8A	NA	NA	NA	NA	NA	NA
ENSG00000183690.12	EFHC2	NA	NA	NA	NA	NA	NA
ENSG00000183691.4	NOG	NA	NA	NA	NA	-1.60197	0.00368721
ENSG00000183715.9	OPCML	NA	NA	NA	NA	NA	NA
ENSG00000183722.7	LHFP	NA	NA	NA	NA	2.30265	2.33505e-77
ENSG00000183773.11	AIFM3	NA	NA	NA	NA	NA	NA
ENSG00000183779.5	ZNF703	NA	NA	NA	NA	-1.38806	2.0817e-11
ENSG00000183780.8	SLC35F3	NA	NA	NA	NA	NA	NA
ENSG00000183784.5	C9orf66	NA	NA	NA	NA	-1.28269	0.00906349
ENSG00000183798.4	EMILIN3	NA	NA	NA	NA	NA	NA
ENSG00000183801.3	OLFML1	NA	NA	NA	NA	NA	NA
ENSG00000183807.6	FAM162B	NA	NA	NA	NA	NA	NA
ENSG00000183831.6	ANKRD45	NA	NA	NA	NA	-1.88789	2.56583e-16
ENSG00000183833.12	MAATS1	NA	NA	NA	NA	NA	NA
ENSG00000183837.8	PNMA3	NA	NA	NA	NA	NA	NA
ENSG00000183888.4	C1orf64	NA	NA	NA	NA	NA	NA
ENSG00000183908.5	LRRC55	NA	NA	NA	NA	NA	NA
ENSG00000183935.3	HTR7P1	NA	NA	NA	NA	NA	NA
ENSG00000183971.5	NPW	NA	NA	NA	NA	NA	NA
ENSG00000184060.6	ADAP2	NA	NA	NA	NA	NA	NA
ENSG00000184144.5	CNTN2	NA	NA	NA	NA	NA	NA
ENSG00000184160.6	ADRA2C	NA	NA	NA	NA	NA	NA
ENSG00000184163.3	FAM132A	NA	NA	NA	NA	NA	NA
ENSG00000184232.4	OAF	NA	NA	NA	NA	NA	NA
ENSG00000184254.12	ALDH1A3	NA	NA	NA	NA	1.07591	6.21207e-22
ENSG00000184261.4	KCNK12	NA	NA	NA	NA	-2.16297	2.6604e-79
ENSG00000184347.10	SLIT3	NA	NA	NA	NA	NA	NA
ENSG00000184371.9	CSF1	NA	NA	NA	NA	NA	NA
ENSG00000184374.2	COLEC10	NA	NA	NA	NA	NA	NA
ENSG00000184384.9	MAML2	NA	NA	NA	NA	NA	NA
ENSG00000184408.5	KCND2	NA	NA	NA	NA	NA	NA
ENSG00000184414.2	RP11-44M6.3	NA	NA	NA	NA	NA	NA
ENSG00000184451.5	CCR10	NA	NA	NA	NA	NA	NA
ENSG00000184497.8	TMEM255B	NA	NA	NA	NA	NA	NA
ENSG00000184524.5	CEND1	NA	NA	NA	NA	NA	NA
ENSG00000184557.3	SOCS3	NA	NA	NA	NA	-1.72937	1.2308e-73
ENSG00000184564.8	SLITRK6	NA	NA	NA	NA	NA	NA
ENSG00000184588.13	PDE4B	NA	NA	NA	NA	NA	NA
ENSG00000184599.9	FAM19A3	NA	NA	NA	NA	-1.45964	0.0334192
ENSG00000184669.6	OR7E14P	NA	NA	NA	NA	NA	NA
ENSG00000184702.13	2005-09-01	NA	NA	NA	NA	1.10487	4.08964e-18
ENSG00000184731.5	FAM110C	NA	NA	NA	NA	1.15878	2.29167e-13
ENSG00000184795.9	UNC93B5	NA	NA	NA	NA	NA	NA
ENSG00000184828.5	ZBTB7C	NA	NA	NA	NA	NA	NA
ENSG00000184916.4	JAG2	NA	NA	NA	NA	1.46965	3.49042e-15
ENSG00000184937.8	WT1	NA	NA	NA	NA	-4.18386	2.72677e-06
ENSG00000184956.11	MUC6	NA	NA	NA	NA	-3.71148	7.89914e-07
ENSG00000184985.12	SORCS2	NA	NA	NA	NA	NA	NA
ENSG00000185002.5	RFX6	NA	NA	NA	NA	1.40629	0.000193814
ENSG00000185008.13	ROBO2	NA	NA	NA	NA	1.33204	1.14663e-40
ENSG00000185022.7	MAFF	NA	NA	NA	NA	NA	NA
ENSG00000185046.14	ANKS1B	NA	NA	NA	NA	-1.24134	6.61214e-17
ENSG00000185112.4	FAM43A	NA	NA	NA	NA	NA	NA
ENSG00000185115.4	NDNL2	NA	NA	NA	NA	-1.59866	1.41732e-104
ENSG00000185130.4	HIST1H2BL	NA	NA	NA	NA	NA	NA
ENSG00000185250.11	PPIL6	NA	NA	NA	NA	-1.63752	2.02962e-13
ENSG00000185261.9	KIAA0825	NA	NA	NA	NA	1.11296	7.30127e-20
ENSG00000185269.7	NOTUM	NA	NA	NA	NA	-2.75386	6.05694e-93
ENSG00000185345.14	PARK2	NA	NA	NA	NA	NA	NA
ENSG00000185352.7	HS6ST3	NA	NA	NA	NA	-1.85107	0.00155465
ENSG00000185386.10	MAPK11	NA	NA	NA	NA	NA	NA
ENSG00000185483.7	ROR1	NA	NA	NA	NA	-1.04123	3.61314e-30
ENSG00000185499.12	MUC1	NA	NA	NA	NA	1.29318	0.0126412
[truncated: 1,084 more rows]

## Sheet: RNAseq TPM values PP
#chr	start	end	gene_name	gene_ID	strand	D9_PP_sgCtrl_rep1	D9_PP_sgCtrl_rep2	D9_PP_sgCtrl_rep3	D9_PP_T-REX17_rep1	D9_PP_sgT-REX17_rep2	D9_PP_sgT-REX17_rep3
[truncated: 57,858 more rows]

[truncated: 1 more sheets: Day 9 DEG PP]
