# Supplementary material for: T-REX17 is a transiently expressed non-coding RNA essential for human endoderm formation
Source: eLife. 2023 Jan 31;12:e83077. doi: 10.7554/eLife.83077 (PMC9889090; doi:10.7554/eLife.83077)
Supplement: Supplementary file 4. — Raw data of Log10 (ECAD/NCAD) signal ratios and respective quantification from day 5 sgCtrl and sgT-REX17 endoderm cells. Raw data of VIMENTIN signal and respective quantification from sgCtrl and sgT-REX17 undifferentiated iPSCs and day 5 endoderm cells. Raw data of PDX1 signal and respective quantification from day 9 sgCtrl and sgT-REX17 pancreatic progenitor cells. List of putative T-REX17 interaction partners as measured in the RNA-pulldown followed by mass spectrometry. [file elife-83077-supp4.xlsx]

## Sheet: H3K9me3 ChIP-qPCR
Sample Name	Target Name	Ct_1	Ct_2	Ct_3	Average	Adj. Input + % input
Input_sgCtrl_1	SOX17 promoter	24.7977	24.8376	24.6841	24.7731	22.7731
Input_sgCtrl_2	SOX17 promoter	24.8004	24.9193	24.7406	24.8201	22.8201
Input_sgCtrl_3	SOX17 promoter	24.7861	24.7897	24.7518	24.7758	22.7758
Input_sgT-REX17_1	SOX17 promoter	24.9315	24.9047	24.981	24.9391	22.9391
Input_sgT-REX17_2	SOX17 promoter	25.2546	24.883	24.8968	25.0115	23.0115
Input_sgT-REX17_3	SOX17 promoter	24.961	24.849	24.9412	24.917	22.917
IP_K9_sgCtrl_1	SOX17 promoter	40	36.9159	35.9543	37.6234	0.00338552
IP_K9_sgCtrl_2	SOX17 promoter	40	40	40	40	0.000673495
IP_K9_sgCtrl_3	SOX17 promoter	34.9558	36.7633	40	37.2397	0.00442531
IP_K9_sgT-REX17_1	SOX17 promoter	35.0911	40	36.9635	37.3515	0.0045858
IP_K9_sgT-REX17_2	SOX17 promoter	40	36.7585	40	38.9195	0.00162632
IP_K9_sgT-REX17_3	SOX17 promoter	40	40	35.3301	38.4434	0.00211891
Input_sgCtrl_1	T-REX17 promoter	25.3635	25.5099	25.435	25.4361	23.4361
Input_sgCtrl_2	T-REX17 promoter	25.5366	25.5575	25.5511	25.5484	23.5484
Input_sgCtrl_3	T-REX17 promoter	25.3254	25.4175	25.3695	25.3708	23.3708
Input_sgT-REX17_1	T-REX17 promoter	26.6661	26.657	26.7356	26.6862	24.6862
Input_sgT-REX17_2	T-REX17 promoter	26.6973	26.7569	26.8869	26.7803	24.7803
Input_sgT-REX17_3	T-REX17 promoter	26.5366	26.6599	26.6894	26.6286	24.6286
IP_K9_sgCtrl_1	T-REX17 promoter	40	40	40	40	0.00103224
IP_K9_sgCtrl_2	T-REX17 promoter	40	40	36.7351	38.9117	0.00237238
IP_K9_sgCtrl_3	T-REX17 promoter	36.2725	40	40	38.7575	0.00233425
IP_K9_sgT-REX17_1	T-REX17 promoter	35.375	34.3176	33.8931	34.5286	0.108934
IP_K9_sgT-REX17_2	T-REX17 promoter	33.4472	33.4561	34.0041	33.6358	0.215896
IP_K9_sgT-REX17_3	T-REX17 promoter	35.3701	33.8698	35.1219	34.7873	0.0874885
Input_sgCtrl_1	ANKRD30BL enhancer (+)	24.1187	24.0561	23.9883	24.0544	22.0544
Input_sgCtrl_2	ANKRD30BL enhancer (+)	24.0758	23.9978	24.022	24.0319	22.0319
Input_sgCtrl_3	ANKRD30BL enhancer (+)	23.9024	23.8148	23.9624	23.8932	21.8932
Input_sgT-REX17_1	ANKRD30BL enhancer (+)	24.1125	24.0755	24.1622	24.1167	22.1167
Input_sgT-REX17_2	ANKRD30BL enhancer (+)	24.2313	24.1042	24.2239	24.1865	22.1865
Input_sgT-REX17_3	ANKRD30BL enhancer (+)	24.6508	24.1493	24.2896	24.3632	22.3632
IP_K9_sgCtrl_1	ANKRD30BL enhancer (+)	32.0544	32.0463	33.0822	32.3943	0.0771564
IP_K9_sgCtrl_2	ANKRD30BL enhancer (+)	32.111	32.0168	32.0715	32.0665	0.0953442
IP_K9_sgCtrl_3	ANKRD30BL enhancer (+)	31.0903	31.1317	31.2392	31.1537	0.163045
IP_K9_sgT-REX17_1	ANKRD30BL enhancer (+)	31.5933	31.3487	31.7846	31.5756	0.142104
IP_K9_sgT-REX17_2	ANKRD30BL enhancer (+)	32.3139	31.1319	31.5565	31.6674	0.139941
IP_K9_sgT-REX17_3	ANKRD30BL enhancer (+)	31.445	31.432	31.9953	31.6241	0.163008
Input_sgCtrl_1	hTFRC intron (-)	25.0648	25.0414	25.0028	25.0363	23.0363
Input_sgCtrl_2	hTFRC intron (-)	24.9274	25.0795	25.0636	25.0235	23.0235
Input_sgCtrl_3	hTFRC intron (-)	24.8951	24.8815	24.7475	24.8413	22.8413
Input_sgT-REX17_1	hTFRC intron (-)	25.0727	25.1002	25.1058	25.0929	23.0929
Input_sgT-REX17_2	hTFRC intron (-)	25.0046	25.0143	25.1249	25.048	23.048
Input_sgT-REX17_3	hTFRC intron (-)	25.0885	25.087	25.0733	25.0829	23.0829
IP_K9_sgCtrl_1	hTFRC intron (-)	40	36.9443	40	38.9814	0.00158506
IP_K9_sgCtrl_2	hTFRC intron (-)	37.1278	36.914	39.741	37.9276	0.00326148
IP_K9_sgCtrl_3	hTFRC intron (-)	37.7059	37.46	40	38.3886	0.00208833
IP_K9_sgT-REX17_1	hTFRC intron (-)	38.0637	36.2317	37.7019	37.3324	0.00516991
IP_K9_sgT-REX17_2	hTFRC intron (-)	36.3417	40	40	38.7806	0.0018366
IP_K9_sgT-REX17_3	hTFRC intron (-)	40	40	37.7543	39.2514	0.00135768

## Sheet: log10(ECAD-NCAD)
Cell ID	sgCtrl	sgT-REX17				General Statistics	Boxplot
1	-0.0472593	-0.085008					sgCtrl	sgT-REX17		in BOLD the statistics displayed in the boxplot
2	-0.0344478	-0.0275826				n cells	28002	24284
3	-0.174132	-0.141709				Minimum	-0.5983	-0.3341
4	-0.101888	-0.103339				25% Percentile	-0.1188	-0.02848
5	-0.271002	-0.245897				Median	-0.05668	0.03243
6	-0.0916718	-0.104086				75% Percentile	0.006473	0.09265
7	-0.265781	0.0306865				Maximum	0.6113	0.6783
8	-0.0688505	-0.040831				Range	1.21	1.012
9	-0.212206	0.0714812				Mean	-0.05358	0.03377
10	0.0204927	0.0259182				Std. Deviation	0.097	0.09817
11	-0.125437	0.0770714
12	-0.0776462	0.0400229
13	-0.0852991	0.0399009
14	-0.0537036	0.13527
15	-0.078865	-0.11458
16	-0.15161	0.00678997
17	-0.0744639	0.232177
18	-0.217537	-0.107486
19	-0.0682961	0.0453286
20	-0.21256	0.0819001
21	-0.127081	0.0527286
22	-0.162872	0.0163117
23	-0.157998	-0.0295424
24	-0.137531	0.212173
25	0.166726	0.159134
26	-0.116643	0.0110493
27	-0.00752972	-0.0271301
28	-0.0918535	-0.0393534
29	0.0583562	-0.0621211
30	-0.0328588	0.1958
31	0.0416256	0.0814177
32	0.0898613	0.017631
33	0.0942292	-0.137924
34	-0.00458469	-0.0775578
35	-0.260697	0.0324572
36	-0.108764	0.0558116
37	0.0031256	0.161117
38	-0.115266	-0.0575305
39	0.0230861	-0.0593075
40	-0.163707	-0.028875
41	-0.173574	0.129635
42	-0.193337	0.0919999
43	0.0121023	0.0404223
44	-0.158309	0.112827
45	-0.136495	0.0993088
46	-0.106628	0.00936398
47	-0.0556195	0.124066
48	0.0290588	0.0993795
49	-0.0181165	-0.0390189
50	-0.269176	-0.0128801
51	-0.0379683	-0.0634457
52	-0.144782	-0.0702227
53	-0.12701	0.163785
54	-0.129448	0.0697763
55	-0.0812241	0.152313
56	-0.00816661	0.0615321
57	0.0317444	-0.0649662
58	-0.134383	0.0101093
59	-0.0759694	0.0220436
60	-0.083094	-0.0829895
61	0.0563042	-0.0202142
62	-0.134276	-0.0383868
63	-0.17644	-0.0810643
64	-0.0587885	0.00305462
65	-0.109686	-0.0106617
66	-0.167353	0.0804459
67	-0.0246122	0.078131
68	-0.00583021	-0.0484344
69	-0.00514325	-0.0580633
70	-0.118182	-0.0812092
71	-0.0644011	0.219369
72	-0.0432912	-0.0622882
73	0.021374	-0.0977684
74	-0.105908	-0.0667547
75	-0.084804	0.132396
76	-0.153253	0.0479767
77	-0.0967183	0.0158426
78	-0.0841383	0.00736616
79	-0.247241	0.015779
80	-0.110913	0.16477
81	-0.120037	-0.00951837
82	-0.0600718	0.0270367
83	0.0106053	-0.209474
84	-0.224349	-0.135986
85	-0.0614171	-0.0569569
86	-0.0418088	-0.0468588
87	0.107772	-0.0121203
88	-0.0179348	-0.174073
89	0.0131259	-0.0231761
90	-0.0806663	0.0258443
91	-0.181273	0.0052525
92	-0.030622	0.130214
93	0.0139967	-0.0527978
94	-0.15635	0.0127195
95	-0.0627748	-0.067188
96	0.0419423	0.0186338
97	-0.0176534	-0.0499756
98	-0.0996389	0.0260787
99	-0.00707813	-0.00697298
100	-0.0102792	-0.0795831
101	0.00554407	-0.0371307
102	-0.115944	-0.00227621
103	-0.136392	-0.0148046
104	-0.192471	0.0057106
105	-0.203616	0.0648818
106	-0.0883697	-0.155556
107	0.156533	-0.180027
108	0.132651	-0.0503645
109	-0.0402418	0.0873764
110	-0.123609	0.290876
111	-0.0133284	-0.0123507
112	-0.0877585	-0.0569081
113	-0.0490222	-0.0549408
114	-0.19998	-0.0657411
115	-0.142934	0.0641711
116	-0.1723	-0.130233
117	-0.194109	0.109413
118	0.0898472	-0.0197785
119	-0.0909317	-0.214765
120	-0.049209	-0.132414
121	-0.232464	0.0343992
122	-0.115561	0.0589187
123	-0.0714637	0.0403338
124	-0.104491	0.104249
125	-0.116747	-0.201671
126	-0.0955089	-0.0507499
127	-0.0917661	-0.176359
128	0.0345429	0.0670888
129	-0.162221	-0.110344
130	-0.071026	-0.154449
131	-0.0897805	0.0232913
132	-0.149549	0.116317
133	0.0270008	-0.114779
134	-0.0578263	-0.0391726
135	-0.0525064	-0.148036
136	0.0640001	-0.128184
137	-0.0223244	0.0206374
138	-0.0741733	-0.126827
139	-0.144935	-0.0308552
140	-0.183207	0.0628224
141	-0.234424	-0.0484319
142	-0.0714558	0.23647
143	0.078081	-0.0511559
144	0.108828	0.102033
145	-0.0167341	0.0383925
146	-0.0794727	-0.00222916
147	0.00846719	-0.0354549
148	-0.0419481	0.0844818
149	-0.200329	-0.015441
150	-0.161172	0.174641
151	0.0896737	-0.201932
152	-0.170727	-0.292523
153	0.117211	0.0610779
154	0.318413	-0.118896
155	0.054539	0.0102449
156	-0.110275	-0.0514593
157	0.0678257	-0.171214
158	0.102991	-0.0508819
159	0.0609918	0.112568
160	0.325732	-0.0451749
161	0.21129	-0.0250328
162	-0.0258186	0.087362
163	-0.141872	-0.108621
164	-0.140605	-0.0331972
165	-0.00766678	-0.171147
166	-0.14541	-0.123577
167	-0.0745639	-0.25207
168	-0.14716	0.0244166
169	-0.170629	-0.0820767
170	-0.152983	0.0122242
171	-0.103612	-0.0120608
172	-0.0725507	-0.0892124
173	-0.123193	0.0425232
174	-0.0993726	0.0255985
175	0.000895066	-0.124971
176	-0.0519798	-0.0237773
177	-0.0835916	-0.0192284
178	-0.1878	-0.063366
179	-0.0531964	-0.0523279
180	-0.229531	-0.0199752
181	-0.165634	-0.0983148
182	-0.169384	-0.0526644
183	-0.00405044	-0.16131
184	-0.0346259	-0.0166804
185	0.102886	0.0172334
186	0.160939	-0.0943609
187	-0.0098022	-0.0607967
188	0.0151679	0.0740757
189	-0.00393196	-0.00375822
190	-0.01507	0.155977
191	-0.223894	0.115302
192	0.0542056	-0.09314
193	-0.171613	-0.0470938
194	-0.0350994	-0.133673
195	0.0791413	0.029188
196	0.0723185	-0.159078
197	0.189462	0.0876896
198	0.0291343	-0.0394115
199	-0.101656	0.0357022
200	-0.0187504	-0.158128
201	-0.0124902	-0.0620621
202	-0.135143	0.0810574
203	0.0793812	-0.054728
204	-0.0567933	-0.00714129
205	0.00615118	0.0308461
206	-0.020824	-0.0557101
207	-0.164703	0.0200354
208	-0.0791422	0.0539408
209	-0.116498	-0.140411
210	0.068241	0.119181
211	-0.0535384	0.0180274
212	-0.0835262	0.00883397
213	-0.261388	0.0410428
214	-0.10334	-0.0352158
215	-0.0824547	0.058135
216	-0.111667	0.0237854
217	-0.163648	0.0544153
218	-0.117074	-0.15798
219	-0.0469779	0.0374993
220	-0.0753262	-0.135516
221	0.0569419	-0.0863745
222	-0.0525059	-0.178855
223	-0.125288	-0.0606978
224	-0.186344	-0.0515219
225	-0.136128	-0.0467058
226	-0.177442	0.0805911
227	-0.139189	-0.0439424
228	-0.0309629	-0.128638
229	-0.15177	-0.0798042
230	-0.183527	-0.130671
231	-0.0434609	-0.158039
232	-0.105343	0.0395829
233	-0.168141	0.0652236
234	-0.106852	-0.0524445
235	-0.144392	0.0928246
236	-0.0890133	0.100293
237	-0.011463	0.0787861
238	-0.0136993	0.0201052
239	-0.161722	0.084511
240	-0.167496	0.0611898
241	-0.267944	0.027633
242	-0.0497627	0.0419107
243	0.0202393	-0.0235824
244	-0.149675	0.0536014
245	-0.0987055	0.0909763
246	-0.301305	0.0491562
247	-0.245317	0.0677772
248	-0.039789	0.1024
249	-0.0622457	0.00440994
250	-0.0243263	-0.104073
251	-0.131519	0.0394908
252	-0.0844834	-0.0495072
253	-0.0366074	-0.0298113
254	0.050804	-0.046287
255	0.0291027	-0.00091814
256	-0.118272	-0.0609683
257	-0.00456544	-0.159098
258	-0.0964548	0.0260114
259	-0.0149453	0.0140319
260	-0.150173	-0.0881972
261	-0.082285	-0.0196907
262	-0.0446765	0.0402436
263	-0.0296681	0.0288547
264	-0.109973	0.0470982
265	-0.166341	0.126834
266	-0.139305	0.125183
267	0.0869487	0.173312
268	-0.0610402	-0.0972456
269	-0.0104877	-0.00535299
270	-0.0489354	-0.112866
271	0.0929969	-0.0386732
272	-0.321563	-0.167296
273	-0.0943254	0.0162605
274	-0.0852249	-0.101759
275	-0.104342	-0.0572445
276	-0.021333	-0.0109762
277	-0.0560977	-0.00465496
278	0.0386329	-0.156107
279	-0.0590398	-0.0314301
280	-0.00391743	-0.0341514
281	-0.0804616	-0.036841
282	-0.0669824	-0.0648128
283	-0.146668	0.0609068
284	-0.108171	-0.058575
285	0.0418873	-0.149751
286	0.0241714	-0.165608
287	-0.116807	-0.106896
288	-0.087058	-0.131926
289	-0.0309306	-0.0549282
290	-0.229358	0.0167671
291	-0.105539	-0.0854082
292	-0.172436	-0.0757643
293	-0.198983	0.00224997
294	-0.17263	-0.0142864
295	-0.191917	-0.0719009
296	0.0960298	0.329378
297	-0.098133	0.174366
298	-0.285713	-0.0831828
299	-0.0806612	-0.032129
300	-0.0140849	-0.0441955
301	-0.201038	0.0386005
302	-0.010322	-0.0886304
303	-0.0439456	0.022648
304	-0.180579	-0.0952904
305	0.121309	-0.110581
306	0.041366	-0.023534
307	-0.0550096	-0.0578627
308	-0.204077	-0.143753
309	-0.217876	-0.00322845
310	-0.0198106	0.0609465
311	0.0689724	-0.0576584
312	-0.0605892	-0.136817
313	-0.144195	-0.0439542
314	-0.0539073	-0.0720192
315	-0.066091	-0.029336
316	-0.0675745	0.00653906
317	-0.205704	-0.00614288
318	-0.0276286	-0.00315665
319	-0.195635	0.0447477
320	-0.0332983	-0.0533522
321	-0.11872	0.0806215
322	-0.0657015	-0.128972
323	0.0470953	-0.0329616
324	-0.0108891	-0.0183961
325	0.0308175	0.0791172
326	-0.0617394	-0.0248594
327	-0.00764215	0.0322085
328	-0.0422812	-0.0234205
329	-0.0667678	0.0706934
330	-0.164905	-0.062398
331	-0.134546	0.0256501
332	0.144637	-0.0642963
333	0.0297535	0.00536254
334	0.0287178	-0.102379
335	-0.109535	-0.142614
336	-0.160698	0.0382826
337	-0.0545004	0.0610185
338	-0.0834666	-0.0886221
339	-0.043591	-0.00196848
340	0.03791	0.0675298
341	0.00170483	0.0164955
342	0.0188099	-0.0636488
343	0.10476	0.087205
344	-0.0431569	0.0695372
345	-0.107111	0.123118
346	0.0435848	0.0765745
347	0.0505869	0.153166
348	-0.0205577	-0.0865714
349	-0.0866449	-0.0645489
350	0.584576	-0.0593566
351	0.591094	0.0561014
352	0.286579	0.104243
353	-0.0172621	-0.115313
354	-0.116346	-0.0409777
355	-0.165225	-0.0582247
356	-0.141165	-0.0404863
357	-0.0818855	-0.0289904
358	-0.0951124	0
359	-0.218045	-0.0507109
360	-0.135876	0.013269
361	-0.130723	0.0190622
362	-0.154549	-0.112242
363	-0.129359	-0.0331943
364	-0.0825159	-0.0954718
365	-0.183004	-0.152673
366	0.000541748	-0.0781907
367	-0.198042	-0.0349483
368	-0.117742	-0.059303
369	-0.0535145	0.145338
370	-0.112278	0.0157493
371	-0.067479	-0.113558
372	0.00901591	0.0539977
373	-0.0912213	-0.084654
374	-0.0533238	0.0153222
375	-0.181419	0.0298282
376	-0.0575136	0.0174824
377	-0.0945521	-0.00189011
378	-0.0996072	-0.0529548
379	-0.107399	-0.041993
380	0.00134401	0.00391749
381	-0.142726	0.0429211
382	-0.135324	-0.0116686
383	0.0176387	-0.0343982
384	-0.0344641	-0.014295
385	0.142374	-0.109771
386	0.218244	0.0892431
387	-0.0625096	0.0507162
388	0.0306728	-0.0318599
389	-0.182829	-0.105937
390	-0.0283113	0.0138925
391	-0.103262	-0.00426532
392	0.0634518	0.166442
393	-0.201968	-0.181314
394	-0.126137	0.0315103
395	0.0271168	0.055009
396	0.121265	0.0347573
397	0.114418	-0.125284
398	0.0437101	-0.0672876
399	-0.037472	-0.170133
400	-0.165892	0.0254885
401	-0.153003	0.0571908
402	-0.215566	-0.102399
403	-0.163088	-0.0934029
404	-0.0374892	-0.0307748
405	0.104106	-0.0805853
406	0.0197677	0.00866062
407	-0.114489	0.0636522
408	-0.095396	-0.0479224
409	0.0677726	0.011633
410	-0.111082	-0.00739074
411	0.067826	0.0139372
412	-0.0336294	0.00917243
413	-0.0549437	0.12015
414	-0.141826	-0.098281
415	-0.123071	0.0144591
416	-0.084612	-0.201503
417	0.077696	0.00187901
418	0.106199	-0.0309605
419	-0.0242622	-0.0302352
420	-0.0345105	-0.0348583
421	0.0220667	0.236193
422	0.00619965	-0.138899
423	-0.152318	-0.0357522
424	-0.0299686	-0.0321793
425	-0.0567099	-0.122406
426	-0.0409422	0.0366743
427	-0.0275835	-0.0384863
428	0.025965	-0.0296129
429	-0.147545	-0.154551
430	-0.0997113	-0.0122072
431	-0.0124166	0.110853
432	-0.066803	0.109944
433	-0.216589	-0.167023
434	-0.0525045	-0.0718334
435	-0.0994407	-0.169734
436	-0.0384446	-0.0240621
437	-0.162317	-0.118522
438	-0.0638857	-0.126635
439	-0.156244	-0.254055
440	-0.107181	-0.0380492
441	-0.232317	-0.120431
442	-0.087615	-0.0571434
443	-0.141752	0.0814586
444	-0.0362742	0.0197388
445	-0.0975644	0.16203
446	-0.0893227	0.116028
447	0.0537273	0.0152466
448	-0.111445	-0.163994
449	-0.113153	-0.149832
450	-0.00812193	-0.0621926
451	0.00620068	-0.0402132
452	-0.179738	-0.103636
453	-0.041366	0.0247814
454	0.0861861	0.0976838
455	0.00527144	-0.133521
456	-0.0330093	-0.00745131
457	-0.0927928	0.087654
458	0.0096346	-0.0883123
459	-0.100608	-0.0658627
460	-0.0732388	0.00915863
461	-0.0713348	-0.095938
462	0.051582	-0.0207453
463	-0.109538	-0.0608149
464	-0.27039	-0.112378
465	-0.0246692	-0.174363
466	-0.0372493	-0.0208889
467	-0.153618	0.0286452
468	0.0934959	-0.120554
469	0.0306136	-0.0439838
470	0.0155145	-0.0302332
471	-0.192948	0.0375603
472	-0.0515372	-0.0842143
473	-0.162768	-0.162966
474	-0.00777393	0.00847657
475	0.0155077	0.0368041
476	0.0944521	-0.0762114
477	0.0287358	-0.0773813
478	-0.109167	-0.00144962
479	0.104535	0.131182
480	0.159687	0.0685238
481	-0.0837579	0.0714298
482	-0.0513782	-0.0148154
483	-0.135906	-0.02208
484	-0.0933068	-0.125932
485	-0.199766	0.076897
486	-0.0364955	-0.0749402
487	-0.191803	0.0548786
488	0.00157211	0.0706802
489	-0.0584129	-0.171855
490	-0.054035	-0.076961
491	-0.0735418	-0.00223427
492	0.0100283	-0.120505
493	0.0591686	-0.0473772
494	0.0637084	-0.126339
495	-0.131923	-0.0437895
496	-0.086201	0.0502118
497	0.0238129	-0.0128864
498	-0.0217027	-0.0330389
499	-0.0500504	-0.0972177
500	0.0358308	-0.0507358
501	-0.0819766	0.0116836
502	-0.0907798	0.018286
503	-0.110965	0.118591
504	-0.0820158	-0.0323567
505	-0.0673863	-0.122322
506	-0.090733	0.025022
507	-0.131973	-0.0720084
508	-0.199882	-0.224127
509	-0.0316015	-0.096525
510	0.131659	-0.0532905
511	-0.0875819	0.0353546
512	-0.109038	-0.0518351
513	-0.155503	0.0595409
514	-0.0824914	0.0606933
515	0.00398534	-0.023994
516	-0.0930082	-0.146143
517	-0.0122893	0.139227
518	-0.178147	-0.00093182
519	-0.0211893	0.00602999
520	-0.215982	-0.0636703
521	-0.0201962	0.0745463
522	0.0480096	-0.0908531
523	-0.0462186	-0.0798223
524	-0.146857	0.0364786
525	-0.0748328	0.0678191
526	0.0138098	-0.0698803
527	-0.0954194	-0.0592149
528	-0.0890194	0.00216796
529	0.150075	-0.128986
530	-0.0618721	-0.104882
531	-0.0400938	-0.0527981
532	-0.0464866	0.0245843
533	-0.143442	-0.0315375
534	-0.183622	-0.0528541
535	-0.0926865	0.159195
536	0.0126628	0.0504524
537	-0.0675925	-0.019171
538	-0.219291	-0.192608
539	0.0390609	0.00669244
540	-0.00946241	-0.0064567
541	-0.176355	-0.110616
542	-0.109294	0.0136835
543	-0.148289	-0.0274165
544	-0.0616803	0.00641008
545	-0.123211	0.0382559
546	-0.0123763	0.112829
547	-0.0282846	0.084423
548	0.0267772	0.0535498
549	-0.0831153	-0.0515737
550	-0.107313	-0.0492744
551	-0.106947	-0.0155383
552	-0.0692938	0.089269
553	-0.0334454	-0.061843
554	-0.311122	0.114404
555	0.0699496	-0.143796
556	0.213898	0.0312479
557	-0.155961	-0.115826
558	-0.0474635	-0.0193285
559	-0.186028	-0.136605
560	0.0302515	0.00979685
561	-0.212506	0.0470125
562	-0.0384165	-0.11822
563	-0.0553973	0.00670028
564	-0.103334	0.0264082
565	-0.055559	0.00575623
566	-0.00218717	-0.00313695
567	0.00746105	-0.191737
568	0.0223729	-0.0578475
569	-0.0970641	-0.0691116
570	0.0443494	0.0296654
571	-0.0822242	0.103346
572	0.0591492	-0.0743153
573	-0.162356	-0.151594
574	-0.0742235	0.0930092
575	0.0440621	-0.0848192
576	-0.174837	-0.0199311
577	-0.0732626	-0.109412
578	-0.0527123	-0.0514358
579	-0.0116057	0.01482
580	0.0304075	0.0422767
581	-0.134933	0.067215
582	0.0436491	0.0277723
583	-0.118915	0.0161912
584	-0.0756364	-0.0800526
585	-0.0980013	-0.0634127
586	0.000319794	0.124145
587	-0.0208805	-0.00623323
588	-0.138435	-0.0658713
589	0.0665225	0.0394291
590	-0.11375	-0.163352
591	-0.0219888	-0.0349401
592	0.0152422	-0.157773
593	0.0432364	0.0207778
594	-0.115737	0.0161054
595	-0.146357	0.0480479
596	-0.0159507	0.00075478
597	0.0127501	-0.0732507
598	-0.164746	-0.0532479
599	0.0188655	0.14392
600	-0.0261241	-0.155547
601	-0.00312845	0.0471774
602	-0.159419	0.0884901
603	-0.103035	0.0535812
604	-0.203946	-0.121486
605	-0.106167	0.0833158
606	-0.0289894	0.100147
607	-0.0814411	-0.0252388
608	-0.131606	-0.00315779
609	0.161903	-0.0891141
610	0.349197	-0.0958966
611	-0.00953693	-0.0375144
612	0.0312865	-0.00665734
613	-0.144023	0.0612688
614	-0.226902	-0.0430767
615	-0.0504732	0.0144747
616	-0.0501572	-0.0292995
617	-0.146158	-0.0315648
618	0.113931	-0.0413685
619	0.376167	0.0713605
620	0.0352419	-0.00096377
621	0.152557	0.0126929
622	-0.163122	-0.0436035
623	-0.187026	-0.0190141
624	-0.0908336	-0.00656732
625	-0.0905421	-0.0132198
626	0.105851	-0.143234
627	-0.11757	0.0546288
628	0.0478973	-0.0003295
629	-0.104669	0.0428273
630	-0.175012	0.00390185
631	-0.0599083	-0.0370563
632	-0.157576	-0.0222953
633	-0.10767	-0.0719036
634	-0.140812	0.10564
635	-0.159406	-0.069975
636	0.0482082	-0.0906748
637	-0.0829537	0.00560591
638	0.0471748	0.0116268
639	-0.112414	0.110835
640	0.13189	0.0299184
641	-0.178528	0.0839857
642	-0.0315124	-0.0459003
643	0.0307868	-0.0675218
644	-0.0602578	0.0254396
645	0.0223947	-0.106605
646	-0.193672	-0.0604339
647	-0.0532068	0.18253
648	-0.072399	0.0135198
649	-0.259431	-0.0729864
650	0.0684622	-0.099193
651	-0.0484254	-0.056318
652	-0.0425425	-0.0535227
653	0.0497224	0.0234175
654	-0.0392996	-0.0536886
655	0.0516557	0.0392965
656	-0.0571532	0.0266889
657	0.0610328	0.00673959
658	-0.0556224	0.0933742
659	-0.0228303	-0.00702722
660	0.0135945	-0.0180499
661	-0.134128	0.0438425
662	-0.0677403	0.0275961
663	-0.183937	0.038477
664	-0.064738	0.0892056
665	-0.0225335	-0.10272
666	-0.0274408	-0.0708751
667	0.0533167	-0.0100823
668	-0.0806555	-0.0289944
669	-0.0460083	-0.106556
670	-0.0645884	0.0612743
671	-0.0870767	-0.0519086
672	-0.175995	0.0954615
673	0.0260549	0.0605041
674	0.0508756	-0.0289559
675	-0.104709	0.0527126
676	0.0422302	0.120217
677	0.0798582	0.130167
678	-0.0257033	0.00979317
679	0.0107406	-0.0280733
680	-0.142426	-0.0644562
681	-0.123641	-0.159477
682	-0.177065	-0.0346738
683	0.395113	-0.0475275
684	0.305017	-0.0740958
685	0.107342	-0.0661262
686	-0.0777322	-0.0183039
687	-0.133901	0.0169617
688	-0.0903199	-0.0700443
689	-0.0381421	0.0277098
690	0.069687	0.043258
691	0.0119154	-0.0647205
692	0.100121	0.10268
693	0.0282363	-0.00645179
694	0.0874783	0.00474341
695	0.0826039	-0.0427874
696	-0.0504193	-0.00725302
697	-0.0912772	0.0199963
698	-0.00400381	-0.00462523
699	0.0527933	-0.0673679
700	-0.184435	-0.0874741
701	-0.210808	-0.0272752
702	-0.227637	-0.00612527
703	-0.14494	-0.0684106
704	-0.00740512	0.0638453
705	-0.0281172	0.0113682
706	-0.25996	-0.102462
707	-0.0473002	-0.190203
708	0.0226398	0.178989
709	-0.0423056	0.0798821
710	-0.0881333	0.0475686
711	-0.293045	0.02759
712	-0.0199301	0.0342753
713	-0.0943872	0.0954229
714	0.0965963	0.0378769
715	-0.087464	0.180663
716	0.059692	-0.00921762
717	0.128174	0.165605
718	-0.0219404	0.0596847
719	0.0114954	-0.0703134
720	0.0247032	0.042917
721	-0.15288	0.0172366
722	0.0744432	0.083243
723	0.0761302	-0.0125034
724	-0.0448288	-0.0552831
725	-0.0274186	-0.0602142
726	-0.191546	-0.108649
727	-0.155032	-0.125444
728	-0.0888033	-0.146318
729	0.00112833	0.0564086
730	0.0866799	0.131411
731	-0.0752443	0.0856852
732	-0.0507515	-0.0556246
733	-0.107602	-0.118646
734	-0.0952218	-0.0185726
735	-0.0929114	-0.0667661
736	-0.0625555	-0.0168965
737	-0.0387848	0.150332
738	-0.0850311	0.0771294
739	-0.0400329	-0.00372203
740	-0.0409184	0.0117449
741	-0.0431844	0.0480575
742	0.0120445	0.0202127
743	-0.0345309	0.101724
744	-0.10831	-0.0561296
745	-0.079169	-0.0109476
746	-0.0211569	0.0375942
747	-0.207907	-0.0586601
748	-0.153931	-0.117936
749	-0.0199066	-0.143446
750	-0.20965	-0.108726
751	-0.127549	-0.100715
752	-0.0700503	-0.155438
753	0.122327	-0.139194
754	-0.0448923	-0.144916
755	0.0372753	-0.190368
756	0.0681264	-0.131771
757	0.498817	-0.177172
758	-0.202733	-0.155089
759	-0.0526022	-0.167008
760	-0.0935773	-0.0235446
761	-0.0155842	0.0307153
762	0.0311787	0.122076
763	-0.118844	0.00680509
764	-0.0353392	-0.064645
765	-0.12274	-0.073726
766	-0.141705	0.0933746
767	-0.00772412	-0.0477679
768	-0.0996643	-0.18574
769	-0.237642	-0.00666857
770	-0.0774667	-0.0301718
771	-0.093166	0.0622092
772	-0.0829541	-0.0194224
773	-0.161771	-0.0179449
774	-0.0194629	0.167297
775	-0.185235	-0.0618392
776	-0.192361	0.0377789
777	0.0529575	-0.0286636
778	-0.0449716	-0.122476
779	0.117482	0.0168589
780	0.000376787	0.0813995
781	-0.052797	0.236785
782	0.00541227	0.116083
783	-0.136684	0.134359
784	-0.279956	0.0246575
785	-0.199473	-0.115671
786	0.0402108	0.0540012
787	-0.187643	0.0812532
788	-0.147498	-0.104364
789	-0.0270297	-0.200078
790	-0.131817	0.014315
791	-0.257772	0.0369164
792	-0.0322633	-0.139056
793	-0.0685092	0.068998
794	-0.207486	0.0593896
795	-0.130367	-0.0708997
796	-0.0765222	-0.0589087
797	-0.0569302	-0.161762
798	0.0496662	-0.14071
799	0.0575426	0.0566992
800	-0.0363767	-0.0246436
801	-0.167531	-0.185306
802	-0.0349977	0.0377839
803	-0.0798016	-0.0563326
804	-0.115359	-0.00411066
805	0.00334985	-0.171109
806	0.0959904	-0.0575109
807	-0.192667	-0.0454836
808	-0.126329	0.163863
809	0.0204012	0.0466277
810	-0.13646	-0.14086
811	-0.00118447	-0.0134889
812	-0.144093	-0.209196
813	0.0980913	-0.164452
814	-0.0532172	-0.061103
815	-0.154236	0.00115017
816	0.00747416	-0.0557785
817	-0.0611569	-0.0425549
818	0.123102	-0.113367
819	-0.106711	-0.0661212
820	-0.129458	-0.0116311
821	-0.197763	0.0154349
822	0.0329729	-0.121893
823	-0.164625	-0.00610353
824	-0.123316	0.00828632
825	-0.00249891	0.122164
826	-0.215072	0.0423047
827	-0.14552	-0.0319523
828	-0.233791	0.0301332
829	-0.138945	-0.0829975
830	-0.000206323	-0.0142692
831	-0.0174061	-0.076884
832	-0.119551	-0.0401711
833	0.0334671	-0.00019786
834	-0.143899	-0.0503673
835	-0.0588205	0.0091212
836	-0.0322909	-0.107442
837	-0.162339	-0.0741552
838	-0.0759954	-0.0505982
839	0.180366	-0.0944378
840	0.178481	0.0385341
841	-0.00829668	-0.0625267
842	0.0187655	-0.126175
843	-0.0228476	-0.180899
844	-0.00574734	-0.0871797
845	-0.143802	-0.0738694
846	-0.139784	-0.087909
847	0.00721339	0.0653198
848	-0.128832	-0.0402745
849	0.0609757	0.0578219
850	0.0775359	-0.0467837
851	0.126738	-0.0472626
852	0.171472	-0.00945
853	0.172327	-0.0331406
854	0.0395453	-0.0369063
855	-0.144083	-0.0241242
856	0.0632709	-0.00595824
857	-0.079548	-0.0154338
858	-0.121695	0.132949
859	0.0413708	0.0364992
860	0.0866371	-0.0247493
861	-0.0950775	-0.0319091
862	-0.143681	0.048434
863	-0.0433056	-0.011588
864	-0.105897	0.0643989
865	0.22951	0.0835165
866	-0.00915739	0.0626142
867	0.00985475	0.00016539
868	-0.0336512	-0.0221993
869	-0.039355	0.022892
870	-0.127363	0.0712696
871	-0.0788917	-0.0475409
872	-0.106842	-0.0348747
873	-0.0907196	0.0323538
874	-0.108918	-0.0492256
875	-0.0468244	0.00359847
876	-0.09036	0.056142
877	-0.0629267	0.0562435
878	0.00197105	-0.0319819
879	-0.00652878	0.00731875
880	-0.0447193	0.103467
881	-0.107705	0.118776
882	-0.0823008	0.0753826
883	0.0164834	0.0305762
884	-0.00563067	0.0147214
885	-0.127631	0.0258344
886	0.0386022	0.0883582
887	-0.0565533	0.0314709
888	0.0420164	0.019059
889	-0.106069	-0.0515711
890	0.0794868	0.0691977
891	-0.100013	-0.108259
892	-0.0743114	0.0219784
893	-0.0465779	0.0621042
894	-0.210707	0.279644
895	-0.00237046	0.133614
896	-0.123559	0.0706623
897	-0.168768	-0.0109172
898	-0.00462859	0.038089
899	-0.0801525	0.0843104
900	-0.09731	-0.0430588
901	-0.047115	0.0797044
902	-0.168881	-0.0394221
903	0.165003	0.0436678
904	-0.226881	0.0744097
905	-0.160091	-0.0384224
906	-0.0956428	-0.0896816
907	-0.0877289	0.0424155
908	-0.217937	0.042
909	-0.176527	0.0481853
910	-0.00285721	-0.0943064
911	-0.15563	0.0500087
912	0.0180419	-0.173024
913	-0.0828462	-0.0898776
914	0.00582532	0.00442653
915	-0.0868382	-0.0749439
916	-0.158154	0.0172396
917	-0.135935	0.065772
918	0.00112221	-0.00087857
919	0.0193033	0.0646821
920	-0.18513	0.0996494
921	-0.190031	0.0702164
922	-0.184652	-0.0740987
923	-0.07331	0.0521401
924	-0.146985	-0.0384039
925	-0.14439	0.0484175
926	-0.0703463	0.0873021
927	-0.146192	0.00176642
928	-0.232505	0.023846
929	-0.0862484	0.0907521
930	0.0348433	-0.0887313
931	-0.0530103	0.0131735
932	-0.229874	-0.16466
933	-0.124243	0.0254352
934	-0.0655183	-0.0570017
935	-0.088536	0.0367986
936	-0.169347	0.0586918
937	-0.0612404	0.191024
938	-0.0761489	0.122608
939	-0.159701	0.133439
940	-0.174067	0.024698
941	-0.0386717	0.0363489
942	-0.284458	0.163425
943	-0.195976	0.0160321
944	-0.0992273	0.165701
945	-0.0142378	-0.0465061
946	-0.235263	-0.00391847
947	-0.134864	0.0468184
948	-0.0551844	0.0374252
949	0.00310911	0.031628
950	-0.0128645	0.0258504
951	-0.129851	0.0108781
952	0.0926511	0.00834847
953	0.00233273	0.105542
954	0.0336255	0.0364805
955	-0.0302733	-0.0171225
956	-0.159021	0.0204919
957	-0.253158	-0.0857506
958	-0.165006	-0.0333112
959	0.000896733	-0.0141102
960	-0.0117631	0.0449589
961	-0.155928	0.02944
962	-0.131462	0.0779804
963	-0.111411	0.0246402
964	0.0462106	-0.0721221
965	-0.0112126	0.140295
966	0.0611032	0.0143901
967	-0.0396719	0.0797586
968	-0.0470186	0.183177
969	-0.0783384	0.19842
970	-0.0351902	0.0445323
971	-0.108559	0.0426804
972	-0.0633635	0.00904085
973	-0.116135	0.0834673
974	-0.165404	-0.136049
975	-0.0754221	0.0957199
976	-0.111325	0.0913057
977	0.0743115	0.0270927
978	-0.10045	-0.0275143
979	0.000360603	0.0064744
980	-0.0979388	0.125404
981	-0.118883	0.0960812
982	-0.0158178	0.0748657
983	-0.00127531	0.0524253
984	-0.120635	-0.00698969
985	-0.0184851	0.0871303
986	-0.0422198	-0.00493348
987	0.0500454	0.00623804
988	-0.108355	0.0395524
989	-0.0419835	0.0580029
990	0.0198321	0.00219412
991	-0.197581	0.0325583
992	-0.113547	0.117449
993	-0.0522155	0.00068582
994	-0.0797693	0.127569
995	0.0174074	0.128788
996	-0.0896386	0.185937
997	0.0968032	0.00999721
998	-0.00424534	0.0251763
999	-0.0298185	-0.0333632
1000	-0.0616147	0.121782
1001	-0.109293	0.0812473
1002	-0.0158435	0.0591622
1003	-0.0953041	0.115181
1004	-0.0460445	0.0462798
1005	0.222204	0.0479555
1006	0.0806435	-0.118084
1007	-0.117773	0.11002
1008	0.213317	-0.117477
1009	0.0824121	-0.0350336
1010	0.0869127	-0.0868367
1011	0.196892	-0.125716
1012	-0.0515195	-0.0758116
1013	-0.152276	0.0450917
1014	-0.0368429	-0.0853169
1015	-0.0758941	-0.100512
1016	-0.0353842	-0.113286
1017	0.014112	0.107643
1018	-0.0278587	-0.0220539
1019	0.0601972	-0.0258887
1020	-0.0968688	0.073749
1021	-0.083563	-0.030252
1022	0.0707748	0.0316724
1023	-0.00254991	0.141734
1024	0.0717516	0.117272
1025	0.0847999	0.0286194
1026	0.118555	0.22925
1027	0.26249	0.260263
1028	-0.00473734	0.338357
1029	0.0974163	0.0188834
1030	-0.0757838	0.0957323
1031	-0.0502422	0.130168
1032	-0.197246	0.111906
1033	-0.0510523	0.0348943
1034	0.0327242	-0.111188
1035	-0.0459164	0.0598497
1036	0.00173404	0.0157047
1037	-0.0654875	0.16779
1038	-0.0345346	0.216676
1039	-0.245907	0.232132
1040	-0.146357	0.128603
1041	-0.0948873	0.124505
1042	0.0180096	0.0302893
1043	0.065634	0.270297
1044	-0.0838612	0.17778
1045	-0.0397538	0.2
1046	-0.00454373	0.260417
1047	-0.086934	0.260498
1048	-0.074746	0.0868031
1049	-0.0940756	-0.0226814
1050	-0.0784969	0.0868401
1051	0.0787886	0.0079955
1052	-0.057186	0.180906
1053	-0.224097	0.098492
1054	0.0351653	0.174292
1055	0.122622	0.0538713
1056	-0.228454	-0.0490541
1057	-0.0188204	-0.135144
1058	0.015655	-0.0581106
1059	-0.119956	-0.0959235
1060	-0.155292	0.0456382
1061	-0.0915599	-0.00865597
1062	0.0521667	-0.0169082
1063	-0.0680027	0.293923
1064	-0.0826691	0.292407
1065	-0.0366317	0.0593911
1066	-0.132767	0.252523
1067	0.0303587	0.299437
1068	-0.107903	0.00374997
1069	-0.202824	0.0536621
1070	-0.0359757	0.0819345
1071	-0.0325693	0.368348
1072	-0.067036	0.339198
1073	-0.115088	0.433393
1074	-0.128313	-0.0569781
1075	0.0294093	0.0858892
1076	-0.0361824	0.122414
1077	-0.327557	0.0891548
1078	-0.028357	0.0192537
1079	0.11456	-0.0736568
1080	0.1007	0.147713
1081	-0.0623909	0.186643
1082	-0.12746	0.256992
1083	0.213381	0.00413336
1084	-0.0805227	-0.10532
1085	-0.0896373	-0.0418478
1086	-0.120112	0.0255337
1087	-0.0772509	0.041751
1088	-0.0220893	0.138308
1089	0.0911822	-0.0429292
1090	0.0831407	-0.133022
1091	0.0742951	-0.0519273
1092	0.0429122	0.124009
1093	0.0585164	0.0576545
1094	-0.0668999	0.00015256
1095	-0.011279	-0.0713197
1096	-0.158473	-0.0847277
1097	-0.100014	-0.0742326
1098	-0.071125	0.0127629
1099	-0.152264	0.0542479
1100	-0.0807888	-0.0609683
1101	0.0391726	-0.10197
1102	0.112477	0.0145927
1103	0.0357116	-0.030046
1104	0.110832	0.122845
1105	0.414902	-0.0103456
1106	-0.222538	-0.0240198
1107	-0.0169119	0.12092
1108	0.0169306	0.0768918
1109	-0.125868	0.152726
1110	0.0263886	0.0458109
1111	-0.0699941	-0.0330755
1112	-0.245179	-0.0370033
1113	-0.0554165	-0.015325
1114	-0.000255668	-0.00650772
1115	-0.0298919	0.00373688
1116	-0.166147	0.125553
1117	0.0124917	-0.0271835
1118	-0.138363	0.0291908
1119	0.0300405	0.133957
1120	-0.124537	0.0161843
1121	0.0560206	0.165321
1122	0.0918415	-0.042386
1123	0.267632	0.0483019
1124	0.201126	0.0599651
1125	-0.118677	0.134335
1126	-0.230791	-0.0133533
1127	0.0584069	0.0341308
1128	0.0227027	0.246746
1129	0.172359	0.118691
1130	0.0270112	-0.118332
1131	-0.0778142	0.0910201
1132	-0.226576	0.225718
1133	-0.0316078	0.23061
1134	0.0529669	0.26044
1135	-0.00975673	0.110959
1136	0.122712	-0.00718339
1137	0.0226429	-0.107768
1138	-0.0598028	0.181778
1139	0.153807	0.124312
1140	0.0544571	0.259988
1141	0.0758244	0.0894067
1142	0.0179424	0.0231276
1143	-0.124692	0.0202264
1144	-0.105711	-0.0892
1145	0.0225852	0.131772
1146	-0.0556113	0.0470406
1147	0.0281356	0.0509686
1148	-0.0442279	0.0779279
1149	-0.127867	0.0511438
1150	-0.0796012	0.0133563
1151	0.0502047	0.00336506
1152	-0.0463493	-0.0643785
1153	-0.141559	-0.100605
1154	0.0108403	-0.140192
1155	-0.159446	-0.122369
1156	-0.10183	-0.193817
1157	-0.230609	-0.0575942
1158	-0.021025	-0.0181203
1159	-0.134897	-0.0537611
1160	-0.151698	-0.0555077
1161	-0.0895634	0.0230302
1162	-0.109903	0.0364192
1163	0.0308561	-0.0602294
1164	-0.0466279	-0.0462948
1165	-0.196073	-0.0198317
1166	-0.107817	0.0214353
1167	-0.0871075	0.0693407
1168	-0.00440239	-0.0623705
1169	-0.165249	-0.0382422
1170	-0.0542599	0.0408606
1171	-0.0593192	-0.171873
1172	-0.133943	-0.0528535
1173	-0.0914305	0.0722998
1174	-0.00927314	0.187673
1175	0.0182536	0.0785289
1176	-0.101262	0.189854
1177	-0.0157168	0.0114627
1178	-0.0887842	0.121824
1179	-0.130969	0.0718679
1180	-0.143023	0.140213
1181	0.099002	0.192415
1182	-0.190854	0.0650853
1183	0.0504339	0.0124279
1184	-0.165244	0.036567
1185	-0.182386	0.0839504
1186	-0.00593947	0.076322
1187	-0.0890839	-0.0485429
1188	0.080619	0.07156
1189	-0.240468	0.0186907
1190	-0.194115	0.11198
1191	-0.0534638	-0.0845126
1192	-0.0513518	-0.00106505
1193	-0.214063	0.0596138
1194	-0.0700402	0.00121261
1195	-0.0452145	-0.118821
1196	-0.158108	-0.108777
1197	-0.0758154	-0.094887
1198	-0.177429	0.120132
1199	-0.170644	0.0978145
1200	-0.087579	-0.0456591
1201	-0.0245321	0.0727094
1202	-0.242306	0.0963592
1203	-0.00156251	0.126503
1204	-0.00776725	-0.0324236
1205	-0.0247065	0.0205822
1206	-0.0549434	-0.0333526
1207	-0.0889838	0.0327561
1208	-0.053967	-0.0359671
1209	-0.0816831	0.0639499
1210	-0.0636517	0.0699167
1211	-0.0207511	0.12138
1212	-0.0786325	-0.0255397
1213	-0.0561299	0.0587532
1214	-0.209371	-0.131925
1215	-0.14078	-0.00536547
1216	-0.207539	0.143503
1217	-0.00596791	0.00535738
1218	-0.265485	0.0307672
1219	-0.153073	-0.0765857
1220	-0.110025	-0.0151133
1221	-0.0727171	-0.106679
1222	-0.110758	0.0455563
1223	-0.0428742	0.0564847
1224	-0.125008	-0.118638
1225	-0.121341	0.0379858
1226	0.0407595	0.189674
1227	-0.0791649	-0.00514115
1228	-0.0762751	0.160274
1229	-0.143077	0.07834
1230	-0.0984742	0.0284132
1231	-0.0688533	-0.0543747
1232	-0.12992	-0.150305
1233	-0.081038	-0.00807874
1234	-0.126116	0.0520554
1235	-0.182986	0.0464304
1236	-0.0100576	-0.1525
1237	-0.158022	-0.263424
1238	0.0530529	-0.158458
1239	-0.0815189	-0.0762654
1240	-0.0543508	0.0619972
1241	-0.226653	-0.0211735
1242	-0.0941415	-0.130836
1243	-0.112868	0.0189923
1244	0.0149407	-0.0652376
1245	-0.265989	-0.0358352
1246	-0.13473	-0.0131389
1247	0.110063	-0.125646
1248	-0.0830443	-0.148254
1249	-0.0526902	-0.0135575
1250	-0.151108	-0.0375785
1251	-0.190305	0.0795446
1252	-0.137024	0.0198008
1253	-0.0714866	0.0254231
1254	-0.048103	-0.0855345
1255	-0.224087	0.00889424
1256	-0.162011	-0.0905922
1257	-0.0384854	0.0118695
1258	-0.0690054	0.0195417
1259	-0.118362	0.105801
1260	-0.08308	0.0632747
1261	-0.133131	0.111421
1262	-0.0196601	0.0329359
1263	-0.191438	0.12933
1264	-0.16401	-0.070667
1265	-0.161807	0.00144492
1266	-0.130518	0.135563
1267	-0.136	-0.00341438
1268	-0.0316063	0.0486465
1269	-0.113043	-0.166818
1270	-0.136467	-0.108459
1271	-0.124988	-0.202068
1272	-0.138169	0.0952451
1273	-0.255951	-0.0938707
1274	-0.0654422	-0.0374775
1275	-0.21427	0.0711511
1276	-0.130075	0.0410538
1277	-0.00583517	0.0309503
1278	-0.16587	-0.00395921
1279	-0.15263	0.0975641
1280	-0.102671	-0.0346086
1281	-0.138977	0.140519
1282	-0.00472544	0.0578002
1283	-0.0547495	-0.0691263
1284	-0.0713742	-0.00692818
1285	-0.109823	-0.00637082
1286	-0.151604	0.120204
1287	-0.174801	0.0109034
1288	0.024204	-0.126697
1289	0.00632188	0.0237504
1290	-0.11986	-0.0934718
1291	-0.0545824	0.0994012
1292	-0.166427	-0.0327129
1293	-0.0874843	0.0336895
1294	-0.152938	-0.0118978
1295	-0.250672	-0.058024
1296	-0.0843179	-0.0331684
1297	-0.152623	-0.0417785
1298	-0.114059	-0.00040549
1299	-0.154514	0.0751184
1300	-0.181638	0.00287304
1301	-0.0821413	0.0248882
1302	0.0997313	-0.0243905
1303	-0.116311	0.0330796
1304	-0.225826	0.0957969
1305	0.0259268	0.0801482
1306	-0.19904	0.0986779
1307	-0.080087	-0.0764572
1308	-0.0644441	0.219315
1309	-0.111287	0.238499
1310	-0.0771373	0.0927047
1311	-0.178338	0.0500713
1312	-0.120958	0.118026
1313	-0.000400271	0.0224837
1314	-0.159039	-0.0500312
1315	0.00752212	0.0864937
1316	-0.0474495	0.0987856
1317	-0.0199346	-0.0764915
1318	-0.0667523	0.0117737
1319	0.0433068	0.00338905
1320	-0.109549	-0.0148067
1321	-0.208853	-0.0825453
1322	-0.0870594	-0.174204
1323	-0.0931489	-0.0141108
1324	-0.0347683	-0.251183
1325	-0.0598274	-0.0278838
1326	-0.0876732	0.115986
1327	-0.0662642	-0.046665
1328	-0.0497221	0.053684
1329	0.00132703	0.0275556
1330	-0.132187	-0.0963524
1331	-0.161612	-0.0144369
1332	0.0279598	0.0741954
1333	0.0605413	-0.0333912
1334	-0.0271488	-0.185863
1335	-0.174015	0.0243142
1336	-0.0816714	-0.0572255
1337	-0.209122	0.123767
1338	-0.203707	-0.0227615
1339	0.00954392	0.0226797
1340	-0.184794	0.238956
1341	-0.142244	-0.152148
1342	-0.0786889	0.198439
1343	-0.183341	0.226075
1344	-0.156483	0.094708
1345	-0.0253087	0.0908396
1346	-0.299675	0.0581848
1347	-0.109205	0.0477465
1348	0.0306742	0.0504326
1349	-0.113715	0.195167
1350	0.000339805	0.109623
1351	0.0776437	0.086842
1352	0.170845	0.145565
1353	-0.0215801	-0.169506
1354	-0.184195	0.0315931
1355	-0.0266127	-0.143711
1356	-0.00677263	0.00201167
1357	-0.168326	0.100539
1358	0.14041	0.00403678
1359	0.0403652	0.0958241
1360	0.0959965	0.115711
1361	-0.15	0.0317965
1362	0.254111	0.0306486
1363	-0.136597	0.0280054
1364	-0.04375	0.174675
1365	-0.0348588	0.0357043
1366	0.00401889	0.138224
1367	-0.148063	-0.058909
1368	-0.0984458	0.0415017
1369	0.0490673	0.116775
1370	-0.122012	0.141601
1371	-0.0596987	0.153088
1372	-0.176921	0.020225
1373	-0.17336	-0.126775
1374	-0.218615	-0.0974153
1375	-0.0118477	-0.0937707
1376	-0.0318518	-0.0795998
1377	-0.185322	0.0417798
1378	0.000205941	-0.0186445
1379	-0.104794	0.155197
1380	0.0311379	0.17245
1381	0.11509	0.0902713
1382	0.0872626	-0.010283
1383	-0.148495	-0.0211268
1384	-0.097448	0.0340884
1385	-0.0735306	0.0839239
1386	-0.0550324	0.0496916
1387	-0.0575765	0.0971924
1388	-0.170184	-0.00416351
1389	-0.0721197	0.193847
1390	-0.0629015	0.0655428
1391	-0.0842789	0.139163
1392	-0.0535217	0.0434603
1393	-0.0234354	0.0601527
1394	-0.168619	0.0904021
1395	-0.0245972	0.0332336
1396	-0.0526037	0.0240995
1397	0.00102646	0.0894159
1398	0.0368096	0.10053
1399	0.0329573	0.0463644
1400	0.0415723	-0.1057
1401	-0.0885793	0.150548
1402	-0.21051	0.18349
1403	-0.047409	0.0604891
1404	0.0828687	0.00061085
1405	-0.117899	-0.0174085
1406	-0.132646	0.171257
1407	-0.0782945	0.0188176
1408	-0.177524	-0.0225163
1409	-0.172552	0.00580054
1410	0.0233438	0.0883945
1411	0.0194332	-0.120533
1412	-0.132757	0.0251592
1413	0.0499602	-0.108929
1414	-0.0233141	-0.184412
1415	-0.06568	-0.0980454
1416	-0.0657844	0.0447676
1417	-0.10592	0.0405721
1418	-0.10033	0.058726
1419	-0.157144	-0.152825
1420	-0.0650599	-0.123838
1421	-0.0792249	-0.141895
1422	-0.0993504	-0.215662
1423	-0.160723	-0.0010871
1424	-0.141302	-0.0760107
1425	-0.124312	-0.0471963
1426	-0.126026	-0.0646228
1427	-0.0724583	-0.068639
1428	0.0192681	-0.0507063
1429	-0.0535404	-0.0400944
1430	0.0903724	-0.0994787
1431	-0.0583394	-0.116279
1432	-0.0286169	-0.117218
1433	-0.0345326	-0.104262
1434	-0.0850455	-0.206319
1435	-0.177224	-0.15578
1436	0.0211157	-0.13453
1437	-0.0548157	0.0274542
1438	0.0037087	-0.175433
1439	0.129801	-0.108853
1440	0.0104137	-0.103145
1441	-0.150322	-0.163269
1442	-0.0869406	-0.198477
1443	-0.137043	-0.191842
1444	-0.134588	-0.188668
1445	-0.16789	-0.140761
1446	0.0528334	-0.141408
1447	-0.0102128	-0.12235
1448	-0.117732	-0.0467772
1449	-0.147348	-0.0176383
1450	0.088099	-0.146774
1451	-0.080566	-0.0651361
1452	-0.154843	-0.0672998
1453	-0.0165299	-0.0368132
1454	-0.239806	-0.176898
1455	-0.0785002	-0.140687
1456	-0.0798602	-0.0964064
1457	-0.138602	-0.0950819
1458	-0.0918917	-0.145502
1459	-0.285551	0.00037622
1460	-0.164901	0.0763575
1461	0.0532776	-0.0165418
1462	-0.137583	0.0202404
1463	0.00561275	0.118763
1464	-0.132867	0.00099182
1465	-0.0282527	-0.0879196
1466	-0.0618534	0.175844
1467	0.0953638	-0.0164516
1468	0.22643	-0.0767987
1469	0.190191	0.097897
1470	0.00742762	-0.0936493
1471	-0.0242221	-0.0237783
1472	-0.101467	-0.0964829
1473	-0.183038	-0.096591
1474	-0.0935416	-0.104334
1475	-0.203246	-0.188015
1476	0.0751938	-0.233286
1477	-0.0746696	-0.130184
1478	-0.0574657	-0.15786
1479	0.0260742	-0.175017
1480	-0.0529277	-0.158889
1481	-0.00375329	-0.127528
1482	0.0412142	-0.129894
1483	0.0132909	-0.139194
1484	0.0385595	-0.128753
1485	-0.152565	-0.127422
1486	-0.139483	-0.0520311
1487	-0.154082	-0.0895621
1488	-0.0443619	0.00510882
1489	-0.117027	-0.0797443
1490	-0.0638628	0.0410747
1491	-0.22647	-0.0343222
1492	-0.236357	-0.021153
1493	-0.105385	-0.0873753
1494	0.00233864	0.0275395
1495	0.0965402	-0.0329544
1496	0.0728988	0.147573
1497	0.0316338	0.0178838
1498	-0.155971	0.0703979
1499	-0.111529	0.0528353
1500	-0.103883	0.0880969
1501	0.0331856	0.104159
1502	-0.213319	0.071759
1503	-0.140707	0.0476259
1504	-0.00573149	0.163027
1505	-0.0770919	0.231966
1506	-0.0471686	0.124852
1507	-0.0584743	0.221078
1508	-0.108816	0.234508
1509	-0.0669644	0.50515
1510	-0.172543	0.413902
1511	-0.0279251	0.275817
1512	0.00926868	0.346383
1513	0.0487413	0.409691
1514	-0.141343	0.433997
1515	-0.0561482	0.389221
1516	-0.0989878	0.229612
1517	-0.0959959	0.507221
1518	-0.12143	0.442511
1519	-0.00343375	0.113516
1520	-0.109573	0.155598
1521	-0.146342	0.322953
1522	0.118006	0.473063
1523	-0.0543832	0.489308
1524	-0.0424403	0.590269
1525	-0.185584	0.510755
1526	-0.0648462	0.466888
1527	-0.0660027	0.444037
1528	0.0872011	0.393331
1529	-0.0278869	0.0611147
1530	-0.124681	0.131474
1531	-0.065694	0.18775
1532	0.192162	0.313076
1533	-0.190969	0.128136
1534	0.0534111	0.139861
1535	-0.015032	0.513387
1536	-0.117872	0.489039
1537	-0.108181	0.486187
1538	0.0297208	0.53427
1539	0.0342961	0.526283
1540	0.0648346	0.456099
1541	-0.104477	0.43592
1542	-0.185737	0.438592
1543	-0.127993	0.477911
1544	-0.180914	0.566861
1545	0.142597	0.655881
1546	0.11478	0.551766
1547	0.0715519	0.543731
1548	-0.00542271	0.509687
1549	-0.0572755	0.468418
1550	-0.0645232	0.519138
1551	-0.178498	0.611385
1552	-0.0658436	0.566604
1553	0.128828	0.580889
1554	0.16815	0.464144
1555	-0.00782206	0.405341
1556	0.0430276	0.678268
1557	-0.047558	0.421819
1558	-0.119159	-8.8092e-05
1559	0.0629451	0.159209
1560	-0.0562852	0.186146
1561	-0.084413	0.117817
1562	-0.0292325	0.0633047
1563	0.158783	0.189151
1564	-0.0456336	0.151446
1565	0.015449	0.139811
1566	-0.106188	-0.00262494
1567	-0.0477109	-0.0690617
1568	-0.00769077	0.00437396
1569	-0.0264553	-0.0445586
1570	-0.0641325	0.125642
1571	0.0515487	-0.0710113
1572	0.0239723	-0.0821795
1573	-0.114739	-0.0212999
1574	-0.0442291	0.0144837
1575	0.137461	0.108242
1576	-0.0633556	-0.157455
1577	-0.183163	-0.0947416
1578	-0.0381694	0.0307723
1579	0.0526165	0.0537424
1580	-0.100282	0.0605824
1581	-0.221223	0.0879441
1582	-0.0245196	0.0853223
1583	-0.0295002	0.0872856
1584	0.014262	0.139869
1585	-0.0531617	0.118307
1586	-0.12244	0.160784
1587	0.0456233	0.144194
1588	-0.0592023	0.17992
1589	0.0714355	0.111889
1590	-0.112959	0.0525759
1591	-0.109934	0.160689
1592	0.137735	0.145786
1593	-0.110825	0.0881395
1594	0.0176872	0.205544
1595	-0.0864138	0.195101
1596	0.00220844	0.0581644
1597	-0.164903	0.322493
1598	-0.263173	0.467946
1599	-0.105078	0.607358
1600	0.0160778	0.182944
1601	-0.0575145	0.100167
1602	0.0260888	0.174166
1603	0.0568049	-0.0876166
1604	0.0428581	-0.0778085
1605	-0.13381	0.089327
1606	0.121793	-0.0124621
1607	-0.171735	0.0819393
1608	-0.032963	-0.155576
1609	0.0200713	-0.161428
1610	-0.051836	-0.0724545
1611	-0.106111	0.00619724
1612	-0.213674	0.120701
1613	0.0789997	0.189891
1614	0.0648452	0.174366
1615	-0.0915398	-0.00562319
1616	-0.104885	-0.0151622
1617	-0.122243	-0.00547505
1618	-0.0241661	0.0245755
1619	0.0850761	-0.146575
1620	-0.0214132	0.0717289
1621	0.0516518	-0.160701
1622	-0.00849102	-0.0556282
1623	-0.0917044	-0.0922133
1624	-0.033972	0.0633424
1625	-0.139092	0.0898026
1626	0.0383111	-0.0466531
1627	0.00134715	-0.0209438
1628	-0.0374738	0.124335
1629	0.00909475	0.0133019
1630	-0.0679642	0.0640788
1631	-0.0970016	-0.0236999
1632	-0.0567552	-0.0460475
1633	0.0136515	0.157885
1634	-0.0327341	0.0418498
1635	-0.0371152	0.0939701
1636	-0.025358	-0.0227377
1637	-0.0381552	0.10454
1638	0.0476534	0.121272
1639	0.0715122	0.0171535
1640	-0.150495	0.0562107
1641	-0.12731	-0.0201965
1642	-0.0635384	0.308511
1643	-0.0997135	0.278362
1644	-0.223154	0.0535972
1645	-0.0880846	0.132965
1646	-0.216082	-0.0294892
1647	0.00349544	0.118167
1648	-0.0166868	0.147577
1649	-0.0971523	0.130609
1650	-0.175023	0.010151
1651	-0.00309282	0.104287
1652	-0.0548997	0.146292
1653	-0.0607086	-0.0113482
1654	-0.0936709	-0.0375673
1655	-0.0019319	0.022086
1656	-0.0649038	0.151168
1657	-0.17183	-0.129727
1658	-0.130816	0.0697816
1659	0.0188807	-0.0312276
1660	-0.112494	0.122143
1661	-0.185861	-0.0667464
1662	-0.0456982	0.140165
1663	0.0396669	0.036979
1664	-0.199814	-0.138036
1665	-0.0743947	-0.0742105
1666	-0.0903369	0.004512
1667	-0.0985908	0.0153477
1668	-0.124408	0.209049
1669	-0.0813843	0.107481
1670	-0.00489486	0.123946
1671	-0.0570866	0.111227
1672	-0.0987024	0.0256437
1673	-0.0485901	0.0263145
1674	0.00715998	0.0716364
1675	-0.112555	0.112004
1676	-0.170817	0.0726339
1677	-0.108938	0.0974372
1678	-0.0829061	0.22427
1679	-0.0866516	0.297563
1680	-0.247922	0.0199153
1681	-0.101948	0.158762
1682	-0.0435731	0.21843
1683	-0.019296	0.21904
1684	-0.0706401	0.160633
1685	-0.142717	0.0296872
1686	-0.180013	0.155633
1687	-0.0421004	0.250317
1688	-0.0431801	0.151274
1689	-0.0349504	0.144989
1690	-0.0705048	0.175492
1691	-0.115402	0.102405
1692	-0.0770358	0.236653
1693	-0.192056	0.0567523
1694	0.00528861	0.068363
1695	-0.0553537	0.172899
1696	-0.170543	0.187702
1697	-0.0481349	0.188194
1698	-0.051822	0.0576928
1699	-0.0168411	0.45952
1700	-0.10817	0.345748
1701	-0.0575559	0.0737027
1702	-0.0113665	0.108465
1703	-0.0812945	0.193966
1704	-0.0215847	0.104214
1705	-0.136918	0.141186
1706	-0.0836484	0.186597
1707	-0.00302489	0.188198
1708	-0.129703	0.0815834
1709	-0.11595	0.10449
1710	-0.019958	-0.0273349
1711	0.0281914	0.114663
1712	-0.0811658	0.0819665
1713	-0.0660871	0.0171635
1714	-0.192139	0.29078
1715	-0.00724187	0.0913731
1716	-0.132391	0.0541598
1717	-0.147523	0.130635
1718	-0.168913	0.230483
1719	-0.054311	0.182407
1720	0.0515209	0.101707
1721	-0.141047	0.131975
1722	-0.0552128	0.0850525
1723	-0.0975438	0.0638858
1724	-0.0729259	0.0822241
1725	-0.11199	0.128029
1726	-0.105591	0.0429659
1727	-0.0872	0.0960875
1728	-0.122418	0.130481
1729	-0.133221	0.097391
1730	-0.0305724	0.126675
1731	-0.0463947	0.0404813
1732	-0.119038	0.176174
1733	-0.0494389	0.0989762
1734	0.0148135	0.0857784
1735	-0.0405507	-0.0337731
1736	-0.0523823	0.109675
1737	-0.066837	0.16634
1738	-0.278309	0.194687
1739	-0.116197	0.0738157
1740	-0.206172	0.218746
1741	-0.225336	0.236688
1742	-0.156834	0.153821
1743	-0.0784573	-0.0482803
1744	-0.0873784	0.0581959
1745	-0.125344	0.00324708
1746	-0.0697613	-0.0213442
1747	-0.104977	-0.0115688
1748	0.0225035	0.129212
1749	-0.191354	0.0190641
1750	-0.184561	0.119166
1751	-0.00549695	-0.119185
1752	-0.0470221	0.13632
1753	-0.19675	-0.0177557
1754	-0.0782129	0.0929346
1755	-0.0624951	0.0193616
1756	-0.0018857	0.00425936
1757	-0.169514	-0.100886
1758	-0.0306944	0.100403
1759	-0.0485325	0.0475613
1760	-0.140336	0.00686928
1761	-0.12396	0.0205075
1762	-0.0288254	0.238421
1763	-0.152836	0.121192
1764	-0.092552	0.167166
1765	-0.326052	0.0641957
1766	-0.262396	0.178526
1767	-0.233126	0.120849
1768	-0.138258	0.084819
1769	-0.117615	0.0596172
1770	-0.237977	0.0908214
1771	-0.111126	0.090578
1772	-0.00981583	0.0892135
1773	-0.166138	0.0683666
1774	-0.20512	0.0930094
1775	-0.0154796	0.261204
1776	-0.132663	-0.0198154
1777	-0.00352005	0.00172131
1778	-0.05022	0.0867502
1779	-0.157164	0.0428001
1780	-0.195001	0.0510176
1781	-0.0490861	-0.0520391
1782	-0.15119	0.0956239
1783	0.0807797	0.0276546
1784	-0.107825	0.163547
1785	-0.0330107	0.16174
1786	-0.00161907	0.0744164
1787	-0.148068	0.0694203
1788	-0.223943	0.0293635
1789	-0.282291	0.0851345
1790	-0.153286	-0.0847454
1791	-0.0891958	-0.0820031
1792	0.00369105	0.116949
1793	-0.0449783	0.178085
1794	-0.115863	0.125088
1795	-0.259064	-0.0637209
1796	-0.0537167	0.50319
1797	-0.174691	0.45187
1798	0.0427566	0.441515
1799	0.0574234	0.49981
1800	0.00647278	0.636996
1801	-0.0860743	0.65214
1802	-0.115387	0.464459
1803	-0.196254	0.41678
1804	-0.175946	0.0766231
1805	-0.223592	0.229592
1806	-0.131908	0.0440046
1807	-0.135644	-2.7953e-05
1808	-0.0989673	0.0157162
1809	-0.170549	0.149669
1810	-0.167567	0.219257
1811	-0.198936	0.0304602
1812	-0.123805	0.0653745
1813	-0.100213	-0.0367646
1814	-0.158298	-0.0283171
1815	-0.0506688	0.269166
1816	0.0216009	0.163374
1817	-0.187495	0.180142
1818	-0.0554537	-0.111962
1819	-0.0502107	0.128553
1820	-0.122844	-0.0584657
1821	-0.21875	0.138498
1822	-0.145799	0.15153
1823	-0.239084	0.171191
1824	-0.086393	0.12969
1825	-0.00906379	0.0247415
1826	-0.0709805	0.0619893
1827	-0.0532372	0.095037
1828	-0.14442	0.0773895
1829	-0.00962121	0.0997437
1830	-0.00773688	0.631637
1831	-0.13363	0.525428
1832	0.0691426	0.528104
1833	-0.109095	0.551827
1834	0.087745	0.566916
1835	-0.0736078	0.612407
1836	0.0685997	0.399087
1837	-0.221951	0.199925
1838	-0.140129	0.122301
1839	-0.0173596	0.102933
1840	0.0129681	0.220057
1841	-0.225606	0.13151
1842	-0.0839763	0.0533083
1843	-0.124926	0.0655603
1844	0.0079545	0.0871316
1845	-0.202809	0.180753
1846	-0.0703213	0.142491
1847	-0.147912	0.102623
1848	0.0125397	0.021539
1849	-0.259379	0.103081
1850	-0.108279	0.0353677
1851	-0.0395722	0.0377749
1852	0.0415344	0.0588981
1853	0.00698224	0.389799
1854	-0.037826	0.374594
1855	-0.0608915	0.34595
1856	0.0511022	0.530306
1857	-0.00555759	0.499176
1858	0.0508443	0.662428
1859	-0.0273633	0.484623
1860	-0.103077	0.347524
1861	0.0293399	0.160727
1862	-0.146322	0.0913343
1863	0.0160583	0.261137
1864	-0.00597152	0.321336
1865	-0.0253431	0.54086
1866	-0.0876454	0.0531974
1867	-0.0569755	0.410867
1868	-0.0797573	0.639152
1869	-0.10672	0.550989
1870	-0.0659781	0.389869
1871	-0.0404674	0.349555
1872	-0.00830619	0.0848249
1873	0.0186086	0.254516
1874	-0.0446363	0.232455
1875	-0.0508742	-0.0104594
1876	-0.22149	0.08578
1877	-0.044343	0.00397344
1878	-0.152669	0.147401
1879	0.0114709	-0.0449987
1880	-0.221272	0.221966
1881	-0.111557	0.153032
1882	-0.0423243	0.0529328
1883	-0.0437307	0.0544453
1884	-0.017885	0.267238
1885	-0.113184	0.168919
1886	-0.0878929	0.0970819
1887	-0.0162644	0.0211526
1888	-0.0368378	0.190583
1889	-0.114605	0.335553
1890	0.0212752	0.183101
1891	-0.161089	0.00638659
1892	0.00113612	0.124264
1893	0.00192592	0.154775
1894	-0.147538	0.0172511
1895	-0.207011	0.173728
1896	-0.180657	0.0967748
1897	-0.0838812	0.108745
1898	-0.0616455	0.157052
1899	-0.0763009	0.240787
1900	0.0941363	0.0675901
1901	-0.151149	-0.0500304
1902	-0.155585	0.0842622
1903	-0.0988704	0.0031316
1904	-0.111878	0.00356337
1905	-0.0790189	0.156645
1906	-0.0990267	-0.0218846
1907	-0.27203	0.0238555
1908	-0.0392921	0.103695
1909	0.0915923	0.0316371
1910	0.051795	-0.00819248
1911	0.118985	0.0442428
1912	-0.167317	0.382069
1913	-0.066702	0.591727
1914	-0.048249	0.474487
1915	0.147424	0.475653
1916	0.0763071	0.550749
1917	0.149017	0.547678
1918	-0.118832	0.466146
1919	-0.0414891	0.628933
1920	-0.0704091	0.557979
1921	-0.149227	0.43676
1922	-0.0442594	0.568263
1923	-0.20219	0.604466
1924	0.0262327	0.478743
1925	-0.202997	0.428499
1926	-0.146448	0.0829367
1927	-0.0778583	0.0505263
1928	-0.15073	-0.0011865
1929	0.0752036	-0.0133712
1930	0.0554443	0.175479
1931	0.0920329	0.181698
1932	0.26864	0.0706844
1933	-0.0944303	-0.0333958
1934	-0.0650435	0.141102
1935	-0.187749	0.0195776
1936	-0.177884	0.196208
1937	-0.0354631	0.023899
1938	-0.202315	0.123352
1939	-0.00292765	0.0260336
1940	0.00436936	-0.00293278
1941	-0.0869664	0.0917121
1942	0.0762894	0.0980923
1943	-0.155138	-0.0008581
1944	-0.0812961	0.0723224
1945	-0.215118	0.0510314
1946	-0.0742936	0.187393
1947	-0.0134553	0.15915
1948	-0.0739034	0.18435
1949	0.0462021	-0.00056343
1950	-0.274854	0.191196
1951	0.0656595	0.184492
1952	-0.100046	0.0671267
1953	-0.113248	0.115053
1954	-0.0232853	0.345066
1955	0.0843728	0.362967
1956	-0.00259658	0.192207
1957	-0.122878	0.2543
1958	-0.129381	0.214325
1959	0.16367	0.0150534
1960	-0.298961	-0.0388395
1961	0.03742	-0.0347602
1962	-0.0110478	0.254366
1963	-0.218369	0.310134
1964	0.0169635	0.396136
1965	-0.0760661	0.239163
1966	-0.0332816	0.445043
1967	-0.0215747	0.371634
1968	-0.161145	0.0253174
1969	-0.2781	0.00787857
1970	-0.1106	0.0640637
1971	-0.0670975	0.012844
1972	-0.064176	0.134103
1973	-0.0647628	0.141284
1974	-0.0115707	0.127076
1975	-0.0290409	-0.0303557
1976	-0.0378979	0.0892757
1977	0.137883	0.125825
1978	0.116208	0.0302453
1979	-0.0418301	0.128661
1980	-0.0939462	0.0362508
1981	0.0299231	0.0613234
1982	0.207708	-0.00015556
1983	0.169866	-0.00019495
1984	-0.0019858	-0.0112346
1985	-0.0268288	0.0448817
1986	-0.0761293	0.0101988
1987	0.1791	-0.00605933
1988	-0.0621124	-0.0225675
1989	-0.0894841	0.00933319
1990	-0.0856491	0.0788708
1991	-0.168276	-0.10344
1992	-0.120832	-0.0413528
1993	-0.0255257	0.0162083
1994	0.0329937	-0.0543438
1995	-0.14046	0.0725326
1996	-0.27828	0.130373
1997	-0.12455	0.0738822
1998	0.0325948	0.0712636
1999	0.0636081	0.10043
[truncated: 26,003 more rows]

## Sheet: VIMENTIN-MFI
Cell ID	sgCtrl		sgT-REX17			General Statistics	Boxplot
	Day0	Day5	Day0	Day5			sgCtrl		sgT-REX17			in BOLD the statistics displayed in the boxplot
1	7.85795	19.3776	14.1173	9.04878			Day0	Day5	Day0	Day5
2	18.1758	23.7697	12.7346	9.2721		n cells	3058	11425	2329	14155
3	9.53691	18.6299	15.9415	9.03504		10% Percentile	6.403	11.26	6.527	8.317
4	12.135	21.8968	12.2819	8.65695		25% Percentile	7.426	14.42	7.505	9.39
5	21.7123	22.8055	12.4782	9.9441		Median	9.092	20.58	9.172	11.19
6	11.4436	17.7207	62.8605	10.5502		75% Percentile	11.77	29.24	12.24	14.94
7	16.2441	53.271	9.31441	9.3106		90% Percentile	115.9	192.2	131.8	137.2
8	23.8516	30.2038	12.8238	9.86671		Range	112.4	184.2	127.2	130.4
9	15.9889	20.868	18.3713	10.2664		Mean	10.8	24.62	11.3	13.62
10	10.8728	24.1636	9.80564	9.3908		Std. Deviation	6.718	15.46	7.66	7.452
11	13.5792	40.0751	12.2513	9.38508
12	10.2147	22.3694	8.31262	11.021
13	14.2011	22.6027	7.5213	10.4069
14	10.9205	57.271	5.6931	11.7148
15	9.33182	55.1241	8.50505	12.1914
16	8.99083	82.4311	13.6483	11.8268
17	17.8757	46.76	44.1444	11.6457
18	9.72574	42.5846	11.4477	9.13729
19	12.2156	26.6117	10.6189	11.2516
20	16.7542	32.4701	8.95376	9.23059
21	14.9219	29.4554	8.40761	10.4464
22	10.6941	74.2552	16.1026	11.4746
23	9.06064	29.3176	10.6226	10.0241
24	15.9977	22.7917	9.46291	10.5095
25	18.4502	20.1799	10.7556	10.8048
26	40.2219	34.268	7.55474	9.42644
27	16.9266	22.2877	7.05556	17.513
28	15.5695	39.2298	5.5414	18.562
29	25.2482	38.1993	11.1149	17.0213
30	13.9298	39.0554	11.8061	11.4741
31	21.6996	27.346	10.9159	18.2877
32	14.4912	60.2754	10.0089	9.91855
33	14.0174	36.051	9.75	15.7066
34	11.1315	21.3646	21.7512	10.6955
35	11.6543	20.3621	22.9729	19.5768
36	9.91031	18.0534	9.22687	18.986
37	11.9495	17.8415	25.6523	18.454
38	8.90346	19.2239	8.74914	12.3747
39	12.748	18.2541	12	10.6181
40	15.5172	18.7554	13.2723	12.3536
41	11.7604	30.8772	7.04187	16.9274
42	7.27074	19.4645	6.4939	13.6021
43	8.44143	21.8774	9.5038	15.9547
44	11.3093	22.1096	10.4153	12.3401
45	5.71809	22.6423	12.4114	16.4857
46	6.24708	23.63	16.9133	12.175
47	9.04508	23.8633	9.70481	9.85735
48	13.3277	25.3601	7.5446	10.5125
49	10.4867	23.6837	9.40181	9.86761
50	8.18136	30.0055	25.0939	18.5103
51	8.17558	33.9605	10.9156	18.6174
52	36.7826	93.5971	73.5642	13.2278
53	23.4079	67.0035	60.0415	10.6833
54	10.7383	55.2745	55.9244	12.5433
55	9.49162	44.6957	61.1825	11.5243
56	8.25314	23.8098	61.5668	16.0672
57	6.92072	28.1723	9.87037	11.7191
58	5.76966	25.2317	8.20944	12.9552
59	109.006	49.6132	10.8545	12.5642
60	24.3415	47.3562	15.5221	13.689
61	10.8601	18.2256	28.4588	11.7455
62	14.4193	19.5475	35.5198	12.6023
63	31.7539	24.8171	17.332	10.7853
64	35.9527	30.3389	43.2176	13.3112
65	13.5126	18.6954	13.2961	11.6461
66	13.7248	30.9563	6.10936	11.2391
67	9.35443	17.7285	7.19297	9.89214
68	39.03	15.2408	6.55418	11.113
69	22.8558	34.1944	8.5	15.389
70	22.9446	34.1782	7.15969	11.3612
71	19.6271	21.1301	6.65571	10.4009
72	11.4621	34.3469	5.43501	9.89733
73	12.0471	34.5219	21.2682	36.6314
74	45.2667	33.4376	17.6723	12.5447
75	21.7666	33.9039	8.83798	13.5119
76	33.9244	24.6282	15.5658	10.2466
77	11.7481	25.9431	15.5048	11.6605
78	8.61348	27.1076	21.5058	11.8281
79	19.6991	27.4058	12.2384	18.9558
80	8.49223	26.5608	14.4486	11.5076
81	8.53242	29.2041	6.10944	25.3859
82	8.42692	32.0876	6.06911	38.2322
83	15.5942	21.7483	7.61856	10.4651
84	9.20444	22.0768	14.8354	10.0339
85	16.7938	20.297	5.56369	10.1335
86	6.06156	25.6594	6.3825	11.1185
87	7.4069	46.3985	7.43165	9.98528
88	10.2909	40.2905	13.9823	11.3845
89	12.9574	20.9965	21.8793	11.6985
90	10.805	16.4304	37.7732	11.3887
91	10.7856	20.101	12.0528	9.50668
92	7.02914	31.0474	18.6526	15.1922
93	7.45409	16.6206	13.2606	10.6333
94	7.29798	36.9372	14.7707	12.682
95	10.7578	33.3082	10.0668	10.2478
96	19.8089	28.8091	10.4961	9.72352
97	11.7171	18.4726	9.56324	9.59888
98	12.5496	22.9422	15.3326	9.62576
99	17.9807	21.4931	8.73633	8.96459
100	7.73147	34.2669	7.43551	9.21507
101	9.49045	38.8812	9.0442	8.69578
102	9.2816	40.4813	5.94412	8.72611
103	13.4244	19.7079	10.084	9.46075
104	9.11922	29.5231	7.4555	10.1869
105	8.98471	18.6215	6.02632	10.2294
106	14.6968	32.0372	9.46886	9.61854
107	10.1818	19.4817	11.3419	9.86729
108	17.8604	25.4784	10.4338	13.0087
109	35.904	23.5357	8.57783	12.0726
110	25.0295	18.3381	9.40127	10.4161
111	13.7213	18.5857	8.50071	18.2208
112	32.2794	25.0021	10.3103	10.5343
113	7.59554	22.4837	9.21644	10.7666
114	7.17007	17.1195	9.12329	9.53741
115	7.54362	18.7367	11.337	10.3794
116	8.41512	19.402	8.22422	10.9712
117	6.44742	20.6102	9.87583	11.9895
118	15.3122	19.8062	18.8097	10.3506
119	8.86825	20.9831	12.3462	9.58581
120	7.83737	26	6.43992	11.869
121	8.75896	26.3193	7.26397	11.4026
122	8.86234	21.4018	7.77193	9.5187
123	8.10377	18.8004	15.9295	13.7187
124	8.71893	20.9913	8.13154	9.8603
125	15.4374	16.9655	5.28492	9.45983
126	7.81061	26.7546	7.85307	11.2421
127	7.74965	16.2551	6.0029	8.80217
128	6.74643	21.871	17.7571	30.2333
129	9.96889	26.0992	9.81769	11.6715
130	8.00923	35.4613	7.70633	10.0462
131	8.02305	31.3792	15.9454	13.1032
132	7.09167	26.0362	8.11591	11.9274
133	8.90391	23.2939	9.25745	11.8942
134	7.80355	32.1934	11.5839	8.66981
135	8.21217	26.9301	8.05541	9.6648
136	7.93558	53.5372	7.28709	9.08502
137	18.4202	63.711	6.73977	17.4191
138	8.91966	55.6812	8.39806	9.95761
139	10.5964	24.8832	13.654	10.0927
140	13.136	35.4673	6.94889	9.11086
141	7.30684	42.0512	8.019	19.29
142	9.07829	20.6525	12.727	8.81729
143	8.58333	53.666	9.80743	9.44434
144	11.84	17.3906	8.41682	9.90291
145	8.37573	54.3823	11.4811	10.89
146	6.63882	24.5042	10.3775	11.8934
147	9.147	46.2506	10.5697	10.0118
148	7.24272	74.2395	7.50466	19.143
149	9.71952	22.5416	9.50287	11.8242
150	11.6366	37.75	9.48282	17.8347
151	13.917	19.6032	7.47964	10.3176
152	10.3238	23.5487	9.98998	10.5484
153	10.5036	23.5541	6.91896	9.39052
154	5.39122	30.0592	8.6374	17.3838
155	8.13001	31.8565	6.81588	14.3892
156	16.2904	39.2996	7.33521	10.7575
157	6.29457	40.7428	7.58131	8.8886
158	9.88853	35.2025	8.65479	20.8342
159	10.6795	22.8373	9.11799	14.4776
160	9.88121	25.7021	12.5893	24.4729
161	10.6553	26.6958	14.2541	21.6804
162	10.9605	31.3854	11.4549	13.8393
163	10.1054	56.3689	7.52806	13.3931
164	9.14737	21.8413	8.23636	11.4386
165	8.56162	20.7295	6.68895	27.5
166	10.0246	26.7862	7.47647	13.505
167	12.2292	82.3649	7.18261	26.6933
168	11.9044	29.3977	7.55831	11.4331
169	7.15023	51.4625	8.8555	10.5574
170	6.59309	86.1109	7.61505	12.5648
171	6.77264	22.004	8.1382	19.7846
172	8.40137	30.4761	10.0127	14.8357
173	8.3236	31.7078	7.37768	14.6071
174	7.91354	52.2619	8.60444	19.6736
175	8.74784	34.3339	8.84326	10.0305
176	10.2095	23.7589	7.28009	16.9613
177	11.7728	21.0294	8.0631	13.0316
178	8.2852	22.0203	8.17628	15.8913
179	6.41775	17.8338	5.97546	27.724
180	7.57143	19.2244	8.12346	11.1255
181	11.7873	24.6941	8.13347	10.0118
182	10.0288	30.2379	9.16842	13.0546
183	12.4029	27.1995	9.40719	23.2075
184	11.4612	48.6522	9.53595	22.937
185	9.75788	76.4397	7.99561	10.9972
186	21.953	30.1307	8.87074	10.2418
187	7.4758	43.2023	8.54503	10.6868
188	7.99636	21.3429	8.8578	16.1946
189	8.79335	22.48	11.9616	14.26
190	9.99458	21.2366	5.86792	25.5
191	8.37562	27.0479	9.39957	16.1276
192	8.3509	68.3484	8.4888	22.5843
193	10.6355	41.0392	7.51005	12.7176
194	9.36006	44.7202	8.83432	23.1919
195	8.88391	26.8371	5.85972	17.446
196	11.5777	26.4217	5.64107	11.419
197	12.2289	47.3761	5.49174	13.4618
198	11.283	21.1848	6.69079	24.0321
199	8.96324	20.7621	5.89813	18.0498
200	9.26928	16.6922	16.1473	10.0123
201	7.93501	16.1424	7.17949	8.48709
202	10.4015	54.4869	6.78402	8.58065
203	8.85401	24.0644	6.11765	8.48581
204	8.88752	35.4074	20.3295	8.90499
205	7.97098	27.2345	8.51783	9.4728
206	8.02251	19.9515	6.40741	10.0108
207	9.83014	19.2166	7.06522	14.1656
208	8.19846	23.5405	13.3319	9.45714
209	11.1996	40.1344	8.5562	25.1792
210	18.9957	27.2516	7.01501	10.7163
211	14.8225	16.4916	5.05699	18.6742
212	13.0568	19.2961	6.55282	21.4303
213	7.83175	15.9821	7.80746	9.39954
214	7.48626	16.8026	10.5846	11.0053
215	8.19344	44.2903	7.07011	10.8149
216	7.69424	57.5995	5.70161	9.98257
217	7.57874	18.849	7.89646	10.3416
218	7.55892	21.4206	6.01288	12.7338
219	9.57101	17.027	8.07275	10.8137
220	10.9797	33.6152	9.09735	17.0522
221	16.4014	22.7947	9.21769	10.5909
222	13.464	32.2084	13.6825	9.46919
223	8.90671	16.8485	8.09759	10.067
224	8.28516	21.1027	8.65055	9.37162
225	7.90016	22.2887	15.2302	8.92556
226	8.19073	16.1274	5.73565	9.41096
227	7.81941	16.1538	7.10445	9.45446
228	7.53415	23.1322	8.27382	16.3191
229	9.89206	26.7199	7.85687	13.1745
230	9.02079	26.2076	18.1308	22.4535
231	7.12935	20.6378	12.7638	18.7929
232	8.15134	22.0758	7.9313	10.3664
233	10.9176	23.3471	9.48187	16.3658
234	9.16856	41.8647	6.98235	9.86925
235	14.3782	39.8179	7.20223	9.22186
236	10.0997	26.7129	11.3477	9.66442
237	28.5528	23.6786	9.68403	13.6998
238	20.9546	63.9582	7.48818	14.8776
239	8.59892	48.3673	7.60597	10.8969
240	9.56672	20.9015	7.31138	17.4111
241	10.3891	28.7534	7.98494	36.8737
242	16.6103	46.1194	6.60617	15.1864
243	5.70413	20.6277	12.5035	10.8432
244	7.84742	22.4628	9.39903	17.3114
245	7.96088	19.6433	10.2641	11.0968
246	17.0518	18.063	10.0351	11.361
247	8.09346	17.8384	12.4462	16.6609
248	14.6743	24.8289	11.071	21.9383
249	6.326	32.8584	9.08175	15.8379
250	9.10599	20.2215	9.04849	26.4648
251	7.36009	21.3669	12.205	10.6894
252	9.97923	65.863	6.66877	10.5362
253	9.14713	23.4122	12.5536	15.3222
254	8.21746	20.2919	10.2022	25.5778
255	8.99269	19.5764	7.96759	14.8754
256	14.5751	17.5523	6.7967	26.634
257	39.0595	15.6565	7.92601	17.4463
258	9.88027	19.5315	13.7471	25.5714
259	7.83386	21.1895	8.80908	15.9701
260	8.3252	20.0417	5.8327	9.6548
261	10.8972	29.5476	7.61364	10.1542
262	11.4796	67.5044	7.42963	9.55082
263	7.92672	33.3615	9.92062	13.2719
264	12.4944	33.4953	7.16594	13.018
265	10.6728	30.2567	7.20539	11.3165
266	8.69208	29.3834	8.35102	12.6082
267	18.7114	41.5143	11.249	14.9013
268	8.63566	40.0525	6.71201	16.0376
269	7.74142	26.1865	6.78389	10.7701
270	7.09203	22.1378	7.16683	31.1013
271	7.34576	27.0266	6.59142	20.9855
272	14.1515	16.8032	6.8863	16.3738
273	6.30267	19.044	6.27151	9.51982
274	7.91937	48.9054	8.85652	13.2299
275	9.27558	20.2255	7.80751	10.5743
276	13.2794	20.0899	8.38545	15.9602
277	12.4222	33.3942	6.47876	25.1098
278	9.29528	31.95	7.1023	32.1012
279	6.91786	17.6635	5.65502	13.1269
280	7.08945	18.038	8.15162	11.7624
281	7.59844	15.7454	6.48161	16.986
282	7.24138	16.5529	6.64259	12.4788
283	9.13784	19.4677	5.91123	10.2019
284	7.17529	24.9142	7.89474	26.9923
285	6.94555	33.6365	9.733	14.3104
286	8.39694	37.9152	10.316	10.4642
287	7.12788	24.2981	8.74007	27.9956
288	8.48611	21.3427	9.93067	18.6609
289	9.64856	64.0178	15.0242	22.1874
290	10.8905	35.3885	11.8226	42.0584
291	8.28319	42.6025	11.0709	14.4581
292	8.9809	45.6823	9.59748	9.66387
293	11.1423	22.7368	9.26452	28.0766
294	8.1763	24.9902	8.8559	9.80266
295	8.87127	26.766	9.12707	10.5954
296	12.1404	33.914	7.17675	10.704
297	7.22446	38.6858	7.3811	15.9704
298	14.835	29.2361	6.97326	9.49643
299	19.1036	47.3802	6.82446	11.2112
300	9.39013	28.7149	6.62801	18.1459
301	16.4013	37.5674	8.36803	11.5449
302	11.0502	24.7297	7.55966	12.653
303	18.5722	53.8826	7.24206	12.3824
304	6.51339	23.3199	7.59111	12.0582
305	7.29193	36.4144	7.17434	12.8594
306	6.74878	33.4174	7.82735	12.481
307	9.57556	18.9856	8.87768	24.3734
308	6.1005	27.5997	8.08583	9.74882
309	7.06372	18.2846	7.47867	17.7882
310	7.1885	17.7484	7.17366	11.0382
311	8.47771	17.6838	8.70714	9.02047
312	7.1225	18.3851	9.58198	12.4462
313	7.24237	27.9264	11.1011	10.8299
314	6.48874	20.7902	8.6518	13.6848
315	9.89458	32.4761	12.5111	66.222
316	13.2039	24.0099	8.63751	27.3153
317	14.194	16.6735	8.62811	9.57546
318	10.8478	34.3403	10.0077	9.99071
319	16.944	21.9171	8.14964	8.71936
320	7.7716	41.0085	9.53245	10.9481
321	6.96429	39.7638	8.96789	12.4281
322	6.9883	22.1678	7.43046	9.31452
323	6.82239	24.3266	8.02978	16.0815
324	7.23479	24.0602	7.19401	14.1929
325	9.52256	31.4494	7.36803	11.4988
326	13.2541	19.2364	9.57895	10.7189
327	12.1101	18.4096	5.74125	29.2654
328	8.60592	18.09	6.16285	26.9224
329	8.05161	29.6818	6.49558	10.3074
330	19.0014	31.9383	5.85679	9.92918
331	8.65047	56.1492	7.56795	13.3597
332	9.17362	95.0065	9.84382	20.1852
333	10.3566	20.4708	14.2062	14.6009
334	7.52648	25.7155	12.0377	13.3203
335	8.58607	17.5005	21.9069	16.7545
336	9.70973	25.7658	7.82783	11.0544
337	6.27261	16.5721	10.7571	13.0224
338	6.25518	17.7383	8.76316	10.1369
339	13.9023	18.3112	10.9803	11.8705
340	11.0918	22.4498	16.156	10.498
341	9.64216	25.3071	9.18531	11.1794
342	14.22	36.8114	7.70994	13.2752
343	9.11898	43.1562	12.0582	11.5573
344	6.41818	17.9967	12.7948	15.5711
345	10.7378	18.9965	9.47721	11.532
346	9.08916	17.9575	8.74949	17.5755
347	9.27459	19.6172	8.98561	12.9649
348	11.5104	20.2607	6.43323	13.3832
349	6.84287	39.8302	10.7945	13.6288
350	6.80123	16.5217	9.63197	25.62
351	9.08421	16.4518	14.1912	11.6072
352	6.70812	18.6051	12.4205	10.1643
353	7.32997	19.2703	10.3795	11.0538
354	12.9859	32.1281	23.2684	13.679
355	11.2427	31.133	9.77503	11.8989
356	13.2992	23.6602	7.11899	14.7105
357	7.77288	25.5942	8.60877	8.93138
358	10.3229	17.2202	7.32122	11.8341
359	15.565	17.3636	9.54331	13.5558
360	8.13142	23.8025	11.5855	14.7348
361	8.27848	17.189	33.5138	18.2464
362	9.88466	28.9112	11.4846	13.4085
363	10.4046	83.7158	13.5263	29.1273
364	25.0778	50.8845	31.4606	21.2405
365	21.9191	14.7428	9.93122	13.3536
366	10.1352	17.2081	10.7544	16.2192
367	8.85995	18.649	20.1496	9.77156
368	9.0767	18.8283	19.6819	12.1162
369	8.45706	22.4589	11.6566	17.9943
370	10.3482	18.5932	28.0951	29.1238
371	9.89299	21.0228	12.9406	29.9043
372	11.808	19.996	9.98546	14.7371
373	11.3112	25.6873	14.4425	25.8852
374	11.6328	19.9094	8.70275	15.1204
375	10.5065	18.3672	8.72165	13.9844
376	8.48305	17.4716	9.12399	13.7096
377	7.54043	18.5292	9.18681	9.9861
378	8.56522	21.5679	8.87945	9.93821
379	7.44609	22.0437	7.40257	13.7695
380	12.292	22.3629	7.50481	14.6612
381	11.1036	38.8274	14.7562	12.6086
382	9.59904	20.7904	18.2224	11.6442
383	10.6545	22.9919	22.2985	10.5223
384	5.78985	14.8598	8.32669	12.5048
385	7.17444	21.435	7	9.29808
386	7.06053	31.1705	5.13413	9.45814
387	7.23942	23.7915	8.59026	11.2906
388	5.58073	23.4923	8.71429	13.8068
389	8.40126	27.312	8.64492	9.41511
390	7.71892	20.0878	9.53254	11.8066
391	7.74343	56.2956	25.2399	9.94938
392	7.37279	22.4809	12.5538	12.2068
393	7.46494	22.0956	11.9645	10.2799
394	7.01523	30.0128	16.6101	41.7454
395	9.42025	59.4398	33.8226	14.604
396	7.99184	38.3993	17.6589	16.9188
397	10.2933	54.6427	11.2207	14.4991
398	9.72242	31.8219	9.53744	17.5012
399	8.97905	26.6384	24.9221	22.401
400	7.39416	23.6801	24.6975	28.5079
401	8.25683	27.1331	20.3299	15.2879
402	10.0522	23.728	22.1243	15.9586
403	9.69156	23.7496	6.66279	51.5274
404	7.97547	20.025	8.54044	13.9908
405	8.13917	35.5169	9.34774	10.2836
406	10.4971	21.1021	9.49195	11.1766
407	15.9582	30.8686	10.3076	11.2255
408	14.3378	37.2166	10.5481	15.5475
409	8.94299	16.9602	9.035	12.1466
410	12.9807	16.3184	9.97778	9.58893
411	9.26761	23.5452	10.2537	9.07585
412	12.0858	37.0164	7.69124	13.4953
413	14.9251	16.0898	10.984	19.9548
414	10.4625	30.6828	9.41785	16.0826
415	11.5403	14.6858	8.02809	10.8873
416	9.99442	16.6651	9.13632	10.1369
417	11.4915	28.9893	9.13457	9.38272
418	12.9632	24.0329	11.8589	11.6054
419	6.53155	27.561	7.24837	19.6719
420	7.11759	28.9055	6.9438	9.09498
421	7.0991	24.1682	8.0096	10.3079
422	6.88098	36.4333	9.21603	26.4354
423	7.4161	121.391	9.26143	11.1365
424	8.3769	32.7764	12.4961	9.79935
425	9.46516	45.229	9.48864	9.50318
426	9.10031	29.9923	13.5941	10.5945
427	11.7629	30.1154	14.0627	10.3163
428	18.6924	27.1394	10.7787	11.2323
429	8.19774	22.079	7.77347	11.0839
430	6.92232	22.2132	6.81261	16.7385
431	7.83976	24.421	9.56403	14.6453
432	9.2037	24.5019	14.9946	12.7406
433	9.3654	22.8556	16.9528	13.9444
434	6.48068	31.8423	12.3966	15.9531
435	7.7215	38.3851	11.3678	14.2409
436	7.7698	27.5871	11.6433	8.84475
437	8.3005	24.7606	8.38811	9.78655
438	8.23631	17.7871	19.3902	10.0642
439	5.60064	28.2564	16.0145	14.8636
440	8.07015	28.2753	9.5448	9.82095
441	7.27911	23.9504	7.77322	10.5848
442	6.71371	20.3046	7.47985	9.18155
443	6.25176	30.155	7.14887	11.462
444	8.70029	37.9137	6.72327	10.8975
445	9.52464	60.4921	9.01434	15.6883
446	7.38723	26.1502	11.0424	16.1104
447	10.023	30.8299	9.02687	10.4175
448	12.34	21.4804	9.07113	10.1509
449	8.66218	37.3037	12.4968	11.8719
450	7.09663	35.3462	10.2326	31.4796
451	7.80273	19.8397	7.80568	28.3887
452	8.62115	22.0029	7.66952	12.9622
453	11.7527	21.2206	6.59686	12.0768
454	8.06458	21.8816	6.76812	13.5094
455	7.99246	17.5327	17.7987	39.556
456	14.5072	19.5151	14.8361	45.9722
457	16.6178	23.037	11.883	45.7585
458	8.65122	25.3426	13.7108	12.0333
459	10.0956	27.5338	9.31503	13.1184
460	12.3009	30.8957	8.55149	14.7979
461	7.92034	20.806	8.67371	10.7635
462	7.91697	35.23	8.49233	8.44444
463	10.0635	31.0093	6.95913	36.4176
464	8.61867	29.9275	6.73958	16.7496
465	14.227	24.3836	10.6724	12.3834
466	9.72093	25.0015	30.1188	9.51578
467	8.15254	22.1698	31.7869	24.3946
468	9.52511	22.0437	12.9263	13.8882
469	11.9928	20.4055	8.38282	9.59402
470	20.0516	18.8725	7.51508	13.1814
471	15.228	30.622	7.37594	20.0637
472	10.1022	29.7053	8.41346	13.3992
473	9.20852	26.2981	8.00632	9.62955
474	9.26445	47.522	7.18199	9.32526
475	10.5764	23.3829	10.1605	10.7695
476	10.6269	36.5453	7.38539	22.4234
477	8.36559	19.3384	7.92384	9.30851
478	7.04204	35.375	6.66865	9.21222
479	12.8987	24.846	5.19807	21.4886
480	9.21343	61.1373	7.49148	10.1426
481	8.63941	68.8156	19.076	9.82755
482	10.1931	44.2081	11.61	11.8861
483	15.6671	26.2287	28.7368	9.25714
484	9.89174	47.9635	25.7549	13.3758
485	11.5923	32.5032	12.7996	9.66824
486	6.22857	19.0134	8.04557	13.6905
487	14.3798	20.7884	7.64805	11.0679
488	10.496	29.207	7.29469	12.5516
489	7.86049	35.1784	12.5818	9.74866
490	13.2885	22.7344	8.95934	9.12318
491	10.4403	19.619	14.9683	11.8757
492	15.5037	36.7361	9.33949	11.1926
493	10.1073	60.4111	10.4423	23.7956
494	8.53715	77.7535	7.68271	9.54224
495	9.12355	77.3164	9.17202	11.5123
496	11.4882	42.8189	8.78732	36.382
497	20.2622	16.783	15.9214	22.5724
498	13.179	25.8038	7.68799	13.3385
499	11.4517	27.103	6.89725	11.4938
500	11.0583	23.2517	8.94118	11.3209
501	7.30901	42.2399	20.8406	9.85576
502	8.13397	40.4327	8.08347	10.4052
503	6.23004	45.0569	9.22762	14.4903
504	8.01089	68.9862	10.6293	38.73
505	19.4703	25.3398	8.91593	13.5424
506	8.35682	24.6584	13.6136	12.1038
507	8.09311	35.9653	13.4458	10.1367
508	8.66714	71.1155	11.0072	9.20513
509	11.85	114.304	9.94979	9.37548
510	7.27135	128.168	11.9815	10.1009
511	23.0617	86.7871	12.2012	17.7077
512	29.2487	17.3812	11.4152	13.6253
513	13.8036	30.0789	13.8972	9.59091
514	12.7922	20.8731	9.94398	10.1998
515	16.078	18.0437	11.2467	10.3382
516	9.54492	29.4531	11.995	15.8106
517	9.02366	18.5416	13.7107	10.4704
518	10.3786	19.6592	17.1689	25.3092
519	7.41056	18.5642	14.333	10.3435
520	7.9164	22.7452	12.8235	11.2036
521	7.5761	31.7901	11.3901	13.607
522	8.92968	30.5822	8.47086	11.3007
523	7.82273	25.5765	11.4361	13.7461
524	6.60459	17.1595	15.1733	22.9722
525	7.43603	20.1745	8.0113	21.2418
526	14.0115	26.7019	9.41086	22.3042
527	6.83682	34.0592	8.66817	38.721
528	7.61771	27.8042	7.26454	35.6276
529	15.2752	15.7126	25.0617	10.4651
530	10.735	54.6979	21.8031	11.0431
531	9.4146	19.2007	13.616	16.6059
532	11.0881	21.1293	16.4537	10.7315
533	7.75794	18.4278	9.28091	11.4779
534	10.0341	25.2312	10.107	11.7229
535	8.66969	96.4609	13.1914	11.5411
536	8.53787	23.477	27.1574	20.3165
537	8.24321	30.1236	21.7537	10.7138
538	9.7243	26.1153	9.99328	10.9362
539	8.31994	30.1302	25.4288	17.0733
540	11.2275	27.6679	8.05246	32.0391
541	9.26763	31.52	22.8137	11.1116
542	8.2777	34.3154	16.4457	10.1985
543	8.26194	33.7035	14.6297	10.4205
544	13.6421	18.4096	15.2911	11.6297
545	12.7937	25.577	9.44534	22.4541
546	7.03241	22.2278	8.59858	33.2179
547	8.0453	18.128	7.77088	35.8889
548	7.20296	21.7615	9.53077	30.976
549	7.83249	29.3779	14.0178	13.9132
550	7.92243	22.2942	11.9539	12.453
551	8.50213	24.197	16.5421	10.3027
552	11.8212	21.9709	9.62563	9.29532
553	13.8793	27.2605	8.55271	12.5215
554	8.12353	41.8168	12.9371	22.291
555	10.4669	28.9457	8.74006	13.0501
556	7.21571	22.5814	13.1337	11.4043
557	7.44381	26.7528	24.757	30.2122
558	9.12178	22.9564	20.9579	15.5736
559	8.31691	27.1753	16.1048	9.93367
560	9.00159	23.4818	17.7201	9.98357
561	9.46894	27.6961	23.8159	10.2219
562	8.17077	50.9291	33.593	13.6017
563	11.0329	25.598	8.3605	14.4233
564	7.92635	50.6595	8.72762	20.2075
565	7.13183	35.5602	17.7597	9.51838
566	4.50177	52.6628	8.76895	10.3857
567	6.16356	32.9084	12.2188	9.71266
568	9.48828	29.0019	9.10829	14.5408
569	7.10571	63.7529	12.4584	10.2774
570	11.0734	73.2254	9.81429	12.1567
571	10.927	137.534	15.0249	13.7192
572	9.00782	21.5895	16.8317	15.2438
573	8.75318	26.5603	9.44627	9.33791
574	8.45482	35.8626	15.9757	9.01728
575	12.5207	22.8283	11.4329	26.1657
576	7.80715	129.923	11.8201	13.6948
577	9.54533	88.1831	11.8698	16.6433
578	12.2684	99.4561	15.7565	14.1406
579	9.21072	45.1739	13.8933	18.1305
580	7.23582	29.9635	16.5129	10.0031
581	7.40517	150.355	9.75223	14.9579
582	11.7154	24.6597	9.35189	17.5291
583	8.85058	63.8429	13.3519	12.1192
584	10.7045	105.418	10.1966	10.7472
585	5.48553	54.6576	19.2415	9.44031
586	7.88248	27.9443	10.7651	19.1307
587	7.41611	55.8791	19.4	18.0462
588	8.5666	50.7169	16.5442	15.0875
589	8.39469	22.6422	7.01473	13.4057
590	7.92076	44.9669	7.41562	12.6602
591	10.5306	22.8109	6.77901	16.6319
592	9.81521	17.6293	6.1468	11.3741
593	15.028	34.4112	7.498	16.0481
594	17.8201	24.1976	8.82419	19.0385
595	14.5938	16.3855	9.35396	10.087
596	6.75994	17.6554	7.25968	9.35574
597	5.32475	16.5743	7.37838	10.0945
598	5.9717	21.1825	7.95572	10.2101
599	7.44222	56.9218	7.14149	11.6781
600	14.085	52.6362	7.12346	22.0456
601	3.54965	26.7205	7.13187	22.7296
602	3.70466	25.8092	7.46806	11.6952
603	12.7276	70.3347	8.40284	16.2929
604	6.90748	50.6392	7.78735	12.2904
605	12.1216	19.399	12.6412	16.4624
606	7.6434	20.8788	12.1128	11.8292
607	11.4053	29.5203	21.9148	10.9116
608	11.6099	18.4572	9.47078	15.1436
609	10.5492	15.7555	6.28111	27.3669
610	7.9973	15.6785	7.99227	14.9868
611	9.63247	25.5176	9.67717	11.2179
612	10.125	18.1276	13.6158	11.5451
613	5.87536	26.5469	12.874	11.7993
614	6.54309	20.1157	12.6799	17.3358
615	8.28814	24.232	15.9045	12.7706
616	10.3618	21.8028	8.36653	39.3606
617	10.752	26.5205	6.76586	28.4468
618	11.0305	40.7023	9.19251	28.3409
619	5.70833	31.5766	6.63339	15.3938
620	8.76364	26.3833	7.73328	16.5797
621	7.9042	37.4511	7.38636	10.7148
622	8.30861	23.9992	10.5769	28.6194
623	9.77805	22.6513	10.2229	18.885
624	10.4309	31.701	26.1983	18.0697
625	7.15205	64.4297	8.3012	49.6806
626	7.29428	39.1302	12.3263	60.5859
627	7.07822	58.3677	8.2553	15.9861
628	6.57038	103.102	10.2119	23.118
629	6.84892	26.7617	8.189	18.4091
630	7.4319	72.2048	9.22701	11.5821
631	6.39318	85.6903	8.67394	15.3407
632	11.2827	94.8359	8.26812	12.8984
633	6.84597	28.7865	7.74567	14.5774
634	7.63881	51.6752	10.2548	31.5991
635	8.46362	23.6588	9.34567	10.4859
636	11.8429	32.3349	23.7265	9.05745
637	8.37826	84.542	6.89695	9.25279
638	8.15399	63.4288	10.8272	10.9544
639	6.9302	45.1713	12.1198	15.2434
640	7.81211	79.6425	8.73961	14.7212
641	6.94455	45.7523	15.892	11.567
642	6.21273	20.5437	12.6696	15.4921
643	6.04508	19.8314	7.43186	41.9185
644	6.15047	26.3571	10.7965	9.73985
645	6.91892	23.0089	8.00978	9.79693
646	6.25	16.4925	9.38441	13.1657
647	6.98663	18.5146	9.96747	14.0352
648	12.728	20.0917	15.5329	11.4985
649	16.2661	19.5911	11.2884	12.1733
650	14.9941	21.8906	12.452	11.4131
651	7.5307	24.7851	10.4886	10.6384
652	7.25105	38.1274	13.5981	37.1603
653	7.68036	32.8525	13.5832	65.1111
654	9.65282	26.7299	18.3083	14.9154
655	7.2201	29.3171	7.63882	19.2143
656	8.08987	19.9686	8.48132	9.62469
657	8.98365	51.6748	8.33623	10.4897
658	5.93931	36.007	9.20437	12.6151
659	19.7865	31.0916	9.68232	11.0472
660	12.1217	20.0928	11.8275	9.26401
661	15.0299	19.4096	18.029	10.1049
662	13.457	22.0164	19.6073	15.3475
663	24.2572	23.0511	11.7391	10.3731
664	31.0418	53.5689	10.3315	23.3037
665	35.8748	24.1367	11.1824	12.1855
666	27.2407	21.0922	33.9531	9.10617
667	16.4466	19.9319	14.0558	10.1541
668	18.6472	20.5455	13.4081	24.2217
669	14.1179	41.2394	14.0692	44.0974
670	10.4602	27.3222	17.6706	11.5236
671	11.9827	17.121	13.939	10.7058
672	10.2818	21.7428	14.7227	12.628
673	10.4423	22.6285	12.6631	11.3344
674	8.8679	45.4927	11.8777	21.1996
675	7.50279	31.8612	10.9347	10.7105
676	5.45294	49.5066	11.1777	9.64162
677	10.5115	56.6857	8.40877	13.2042
678	6.56	21.0098	8.3384	21.0446
679	7.09695	18.84	12.3005	17.8317
680	9.13964	22.1837	15.2151	17.5932
681	11.2911	33.8786	8.84412	15.7865
682	10.485	24.9833	29.0403	31.1789
683	9.81734	39.248	58.6437	12.7416
684	7.76197	31.0355	22.1966	25.8924
685	9.43182	41.0216	68.677	15.2341
686	10.5751	53.027	6.92124	15.5936
687	11.1991	54.7652	8.77568	12.0865
688	8.1691	43.6225	7.19732	10.1342
689	8.54769	28.282	8.48359	17.3346
690	9.14527	33.4559	8.25652	24.954
691	9.63663	25.5745	8.04788	11.699
692	8.99667	21.7458	15.9674	18.9788
693	7.19205	41.836	19.7712	38.0746
694	8.04057	27.0018	8.05035	30.4852
695	8.29709	32.7988	14.0483	12.3355
696	10.0979	36.4794	12.8319	28.6785
697	9.26081	28.9617	11.6926	38.8554
698	9.01514	37.6045	10.1465	22.3884
699	8.19612	29.8459	7.71359	20.0287
700	8.79498	30.1945	8.9284	13.4537
701	8.77419	18.7608	24.4748	19.1092
702	7.44101	17.48	16.2999	18.0673
703	9.45564	21.9109	12.3542	13.4647
704	9.4481	20.8498	9.66421	9.16365
705	8.43005	58.5358	9.70308	9.4146
706	7.65928	16.5392	9.48712	22.3766
707	6.93931	26.3488	14.0377	20.0564
708	8.38401	24.3708	16.1191	14.0481
709	7.02217	21.0007	10.5065	11.1722
710	10.248	47.1559	7.92469	10.2152
711	8.78757	69.4427	7.86134	10.9343
712	7.97233	30.1089	7.40773	14.0806
713	7.10188	31.8482	7.62313	21.6188
714	8.41682	25.0074	6.69939	9.84428
715	13.3067	16.8503	27.4724	18.7365
716	12.5057	20.4593	61.0547	10.3016
717	21.0072	37.179	74.092	18.4209
718	19.1762	20.4259	131.768	33.7691
719	17.6511	28.8253	8.63434	10.3476
720	36.0093	40.7372	6.87598	25.782
721	16.9051	30.8743	26.6501	13.6599
722	21.1878	27.5237	15.1752	20.7344
723	12.7525	38.8228	17.0014	15.1767
724	14.8622	31.3758	48.9019	10.2552
725	12.197	19.9337	48.3282	19.4959
726	11.2572	23.4921	7.75442	24.7467
727	10.5896	22.0128	7.00612	18.3881
728	28.5807	17.9547	7.18623	14.9283
729	19.2816	18.282	7.91608	14.0017
730	12.518	16.5645	8.42704	21.4548
731	10.2611	16.9312	9.39808	15.2221
732	9.72535	16.2157	7.99294	12.9295
733	10.1071	16.5894	7.20279	18.6522
734	11.7675	29.2209	7.51286	10.4075
735	11.3484	30.5777	9.14516	28.5203
736	9.66454	30.456	8.10017	13.535
737	12.4222	28.3286	16.407	13.377
738	12.5949	21.3768	26.5438	11.1372
739	16.089	20.0973	39.8647	18.9535
740	11.7906	20.8631	21.7339	16.0799
741	15.8041	22.5789	29.5311	30.1966
742	16.5858	26.4402	8.84591	10.6904
743	14.3211	36.9171	8.39313	8.39822
744	14.3825	30.1021	10.3235	8.85117
745	14.771	24.8632	10.8206	13.5405
746	21.9811	18.9252	10.2023	19.6546
747	22.5428	17.7127	8.20099	17.2074
748	53.481	17.2775	7.85421	36.2481
749	13.8682	50.0644	7.97436	22.8666
750	25.5301	34.7876	27.9714	14.939
751	33.7082	35.0798	7.54121	10.5055
752	48.262	18.5044	7.60599	11.3191
753	29.9871	19.5962	9.31373	12.4394
754	18.4313	36.9124	10.4797	9.84783
755	29.2327	17.861	8.5232	14.2931
756	26.377	17.548	8.95434	15.353
757	16.0757	18.3705	6.9543	13.6201
758	13.7538	22.1462	8.45828	27.4863
759	12.6846	27.6343	31.9229	10.1164
760	11.546	25.6467	8.32426	9.73463
761	11.0411	35.8278	9.67137	12.9437
762	9.90295	58.128	7.69423	15.7018
763	10.8601	46.5469	7.56186	17.2768
764	14.5207	42.3716	7.80838	28.4443
765	16.2495	45.6537	11.181	13.9805
766	9.55521	19.738	7.28501	13.3426
767	8.52489	21.8755	8.87262	11.0842
768	6.9634	26.3378	44.655	24.1098
769	6.72454	20.8113	5.76174	13.0722
770	6.51233	27.4496	9.41301	12.0013
771	6.10408	41.4635	11.5479	11.7292
772	7.33613	60.259	9.43772	29.2847
773	7.64094	16.2673	12.216	22.7
774	7.46837	30.2514	9.22982	29.6787
775	7.31149	25.7557	14.3127	13.7136
776	7.07219	33.2131	8.46635	10.9204
777	7.3898	15.4907	6.1176	14.6483
778	13.4588	14.8231	68.2436	27.6606
779	20.2464	23.8124	13.3114	29.4496
780	7.95656	74.6611	6.527	14.2156
781	9.1875	38.2975	8.34841	17.4537
782	10.5788	21.3441	13.3644	9.35996
783	12.2953	59.849	8.62179	10.7644
784	12.0221	57.9862	18.423	12.4183
785	6.37176	76.5761	7.26876	14.5258
786	26.9278	85.9482	12.9489	14.7126
787	11.4513	52.6234	8.83929	11.8544
788	9.02495	33.0217	12.0398	10.5579
789	8.43062	78.3422	10.1613	14.2359
790	7.09208	82.5118	18.7281	13.2397
791	5.75262	37.8503	9.09991	22.7565
792	6.55901	25.5889	10.7944	9.64037
793	8.89535	17.2032	5.69848	18.3578
794	11.6954	19.0029	7.77525	28.0214
795	9.5082	27.6673	9.4175	18.0337
796	9.45862	23.7696	14.0955	13.0634
797	10.7694	21.9246	9.57951	14.3398
798	18.9635	19.4229	31.9619	12.4293
799	15.882	19.8247	9.81267	36.1562
800	10.2532	33.9438	9.45147	15.2012
801	10.2934	34.3957	12.8482	23.7497
802	11.2269	15.6504	15.1018	12.1143
803	18.0097	24.0851	10.4876	11.2915
804	29.7368	35.3045	12.0658	18.6935
805	10.7139	31.4443	6.4632	13.3424
806	7.74522	22.8178	12.8697	9.92784
807	10.0464	26.3113	9.01099	13.5669
808	5.89081	21.2806	14.7068	15.0338
809	6.26179	21.9072	17.1655	11.5328
810	7.53275	23.836	24.6084	55.8263
811	9.54721	38.7003	11.523	29.2147
812	6.60028	27.0619	16.1411	15.6226
813	16.6003	22.2363	6.70604	12.8871
814	7.09501	28.4617	6.26655	9.65167
815	37.7908	23.067	16.2469	87.4
816	21.9086	24.5018	19.0646	13.3987
817	19.3638	21.6452	25.3784	13.132
818	7.74449	23.7542	10.9438	13.1693
819	6.13395	18.0388	10.4096	21.3497
820	6.8243	17.9013	18.9295	9.46941
821	8.62	21.8934	14.1728	10.7634
822	11.243	22.5195	29.0086	13.7427
823	10.0093	19.6725	29.2883	39.4222
824	12.3986	17.2719	7.8234	10.6346
825	16.0103	22.3375	8.20241	10.5243
826	26.368	17.2748	10.1875	11.2442
827	16.5926	17.7964	12.7797	10.6189
828	11.6768	23.4004	11.9084	21.8192
829	10.3166	18.6728	8.45156	10.6601
830	10.2228	21.6697	9.51011	10.2973
831	11.4307	17.672	8.85343	9.8187
832	6.4953	36.0043	7.4182	9.55638
833	22.6729	29.7522	7.39413	18.8335
834	9.7163	27.7482	6.70182	10.7063
835	10.7536	35.4013	7.27994	9.78738
836	9.73876	15.4435	6.73088	11.823
837	12.8111	19.8717	7.84137	25.2728
838	21.4737	16.9399	5.56226	22.5492
839	16.7	20.9382	9.47684	13.2346
840	10.4721	67.9745	9.76434	13.7219
841	8.91832	22.4311	7.8435	18.8847
842	8.79694	17.9371	9.73326	16.2055
843	10.1357	83.546	7.7136	19.0332
844	9.02817	16.4158	9.17928	14.3352
845	13.7247	17.2081	8.31154	23.7915
846	7.92327	18.6456	8.20872	19.0133
847	10.6179	21.3443	7.11832	12.6167
848	14.874	16.9115	7.13333	14.4521
849	17.8457	16.0298	7.72371	9.73706
850	6.99471	14.6186	7.94186	15.6389
851	9.10772	17.6474	6.13686	13.4597
852	11.4269	15.7075	6.07116	11.9256
853	16.0635	18.3877	5.72475	11.4801
854	10.119	28.3301	5.84397	30.8484
855	10.34	32.3447	8.8033	12.9145
856	10.1987	17.3344	7.77093	9.46607
857	8.2424	18.2346	7.84095	14.504
858	8.01351	26.7526	7.48143	11.3635
859	7.42667	18.4879	12.1584	14.6511
860	8.57111	23.2352	13.4324	19.674
861	10.7613	19.8652	11.1389	16.0118
862	10.0791	26.4293	8.07586	10.4087
863	7.08615	17.9059	6.36629	10.8795
864	10.7316	18.1354	5.43489	24.5073
865	14.6468	18.4995	7.51708	15.6289
866	8.64477	15.6421	7.21257	14.5242
867	10.4245	15.5598	7.22244	9.33771
868	9.26999	18.9529	6.25134	11.1419
869	11.5672	19.9138	8.00466	12.1987
870	9.83716	16.8815	6.98259	9.72923
871	7.70603	20.2965	5.90014	11.1834
872	12.6205	39.7202	5.09328	9.27429
873	10.3304	30.7218	5.19971	8.84881
874	11.387	24.915	7.81246	8.98233
875	8.58459	15.3071	7.92485	16.2157
876	11.3929	19.3249	7.59409	10.6194
877	9.07749	15.6186	6.89491	10.3036
878	8.22287	20.0342	5.99681	9.20941
879	9.13206	19.6529	5.51513	9.38802
880	8.13597	22.7815	5.67075	9.07477
881	11.4981	37.4303	6.71945	9.08498
882	7.57766	22.3133	7.94152	8.99302
883	7.69213	21.7432	5.70638	11.7631
884	10.0115	28.8775	5.2961	9.08206
885	10.7802	22.8144	5.81531	9.33835
886	7.34023	45.0366	8.02612	8.99878
887	5.97314	44.3551	9.68721	9.33819
888	5.62484	43.1022	30.2596	11.0533
889	9.66314	101.459	37.9755	10.6301
890	9.53027	55.4958	8.75307	10.0283
891	11.3817	45.0091	7.92385	10.0837
892	10.8124	42.3941	14.427	10.057
893	9.43866	69.6588	4.73649	9.49819
894	7.55718	22.9586	11.4116	9.68817
895	6.02339	23.1882	7.40664	9.77753
896	4.99845	33.5223	6.49944	9.75691
897	7.91709	35.7202	5.30516	8.73147
898	9.92774	54.242	12.6581	14.2512
899	6.8062	60.3885	12.3705	18.0139
900	6.43522	42.9111	16.4941	25.8355
901	5.9978	19.0459	7.81641	22.5176
902	12.5059	48	9.8013	13.4648
903	9.4499	19.4256	16.4902	10.1068
904	16.0942	21.0719	30.4851	9.76108
905	12.5121	77.0256	10.9983	11.4896
906	11.3683	24.5018	5.43446	8.82241
907	13.3502	25.6331	8.6764	12.4818
908	7.18614	18.9954	11.88	9.2003
909	11.5144	40.9883	7.66545	10.3267
910	10.0103	18.4911	13.7131	9.8537
911	7.32321	16.222	14.0014	9.76957
912	6.94756	15.7525	10.0516	10.1308
913	6.83876	15.3319	8.13442	11.1278
914	7.10433	18.8781	7.14342	10.1944
915	8.18985	17.4733	7.72133	9.58856
916	6.84384	24.6626	8.57197	9.9889
917	6.9675	21.4195	8.77094	13.573
918	6.6851	16.1442	7.87459	10.7844
919	6.75475	16.5863	7.442	10.8351
920	9.37185	24.3165	9.40479	10.4545
921	13.137	43.1775	11.0283	12.7457
922	12.9434	22.4919	9.53756	11.4161
923	8.00412	15.8362	8.17658	10.7383
924	18.4149	16.4187	7.5702	15.5042
925	9.91045	17.8205	20.6404	9.64345
926	7.21826	16.2155	11.9403	9.81764
927	8.97313	17.4706	26.144	10.3671
928	12.1436	31.2605	13.2908	11.3436
929	8.0108	26.2031	7.88545	13.2706
930	13.3479	19.0518	7.83083	14.936
931	8.95915	16.5235	8.8031	12.1021
932	11.5659	23.386	8.44906	10.6467
933	10.7196	17.1754	9.49615	10.3814
934	5.96259	19.4341	7.34524	16.0658
935	6.18825	37.6588	10.8263	11.4464
936	7.39636	22.1498	13.1445	11.535
937	6.8165	16.2032	9.27383	12.1209
938	7.23232	21.3275	7.42424	11.5784
939	7.35429	18.1785	8.33372	11.5215
940	6.4839	19.97	9.66327	14.215
941	6.13825	19.1091	9.45374	11.9201
942	6.73785	29.6737	8.71551	10.2977
943	8.76604	17.5673	9.48041	10.2021
944	5.32683	18.6823	18.3048	20.9928
945	7.47684	24.7365	17.2838	18.8227
946	7.34926	24.5687	12.9674	13.3295
947	7.45187	33.1545	10.4707	10.7638
948	6.93861	24.2855	10.7735	11.5478
949	6.75221	25.8455	8.12676	15.3246
950	7.35877	17.8414	8.37337	11.3424
951	7.55628	60.5828	13.6601	17.4996
952	7.32	27.2124	9.50246	8.99911
953	6.71507	17.2916	14.6442	25.3458
954	6.57339	22.4221	7.03817	18.1803
955	6.35714	20.8338	8.25761	10.1211
956	6.32415	24.251	7.3939	22.7284
957	5.9055	19.4693	12.3413	9.21866
958	6.8319	17.0957	13.4073	10.6198
959	6.56707	26.1712	7.67527	10.0842
960	6.95443	22.9795	9.60874	10.9003
961	9.56912	18.0423	14.4711	10.1629
962	8.65559	24.9303	11.4302	25.7559
963	13.6156	31.4137	10.7711	11.8907
964	6.98709	18.331	8.90079	17.1542
965	5.84294	24.2716	7.0259	10.1288
966	8.29137	21.0429	7.54852	9.35327
967	6.79551	35.4853	10.3396	9.79622
968	6.72328	64.8235	13.9873	12.2914
969	9.77865	40.8106	16.0273	10.6423
970	11.1472	32.3343	13.4695	14.7553
971	14.1502	16.5499	8.73217	16.4336
972	7.13328	28.9549	12.0606	20.4577
973	6.95223	19.7938	24.1824	28.3301
974	9.5133	23.4188	13.6622	14.0569
975	11.2993	20.1996	14.8496	10.3949
976	16.3528	22.7152	9.70896	10.3838
977	9.27156	21.7576	18.3419	22.4786
978	8.3295	24.4324	13.9946	12.0638
979	7.72141	21.854	9.75702	10.1713
980	7.10177	28.2063	21.7943	9.70636
981	7.37387	32.5039	13.1778	10.8268
982	9.93537	20.2884	9.26976	27.6285
983	8.87176	27.4438	7.45714	14.8883
984	7.28988	27.755	12.4262	11.9393
985	7.65481	26.8589	8.09355	22.7568
986	7.6098	21.7182	10.6562	11.1394
987	7.50209	17.2101	9.69479	12.1159
988	9.67674	17.9261	6.37298	12.9447
989	13.3394	17.4982	10.7541	11.889
990	10.5894	30	10.7732	27.1356
991	8.64933	25.3322	7.79817	18.0323
992	9.75028	24.267	9.01613	35.5071
993	10.4509	19.0187	6.4381	25.6197
994	10.9079	22.2399	15.8333	9.31996
995	7.28963	27.8151	11.6153	9.40601
996	15.2407	27.4163	17.1975	11.5043
997	12.2164	20.9461	10.4872	24.9513
998	9.28762	26.6723	11.5854	15.3096
999	7.90702	51.583	13.1955	16.5115
1000	12.8921	39.8869	20	13.7355
1001	8.22524	69.2593	7.96491	13.6692
1002	8.21585	69.2087	14.981	17.6701
1003	9.11094	60.7388	9.85267	14.8925
1004	9.5299	23.4229	12.847	13.1028
1005	7.89964	45.2013	16.5445	10.8532
1006	7.29481	58.038	15.3472	12.0678
1007	7.72137	16.8142	6.24379	9.2948
1008	7.67458	22.846	8.73628	9.16957
1009	8.62023	20.4744	6.79298	9.1606
1010	11.5018	20.4929	11.8652	16.4618
1011	11.7642	26.0688	7.14359	18.2929
1012	16.5042	19.4504	9.39066	57.6633
1013	15.2005	19.0074	8.75595	12.3914
1014	11.0655	37.6531	14.5676	12.5251
1015	11.0012	26.2581	12.8971	11.927
1016	11.1777	15.2917	9.51022	12.5142
1017	5.74347	19.7172	10.7985	11.1123
1018	12.6598	58.0851	10.6147	11.805
1019	9.26393	19.3295	6.44466	9.74483
1020	8.57879	20.5609	9.04645	13.2892
1021	11.9657	22.9574	9.6312	9.0447
1022	9.66211	60.1473	10.277	9.33617
1023	9.70947	17.9842	8.75841	8.79177
1024	9.91549	27.6144	11.0753	17.1235
1025	9.05459	24.1352	5.92869	22.3527
1026	9.34106	22.8119	7.27222	15.3443
1027	5.57269	17.8331	7.97781	22.9598
1028	14.4527	19.7258	8.66904	11.1775
1029	13.9633	20.6223	13.5535	9.23964
1030	10.9876	16.3437	5.011	12.1437
1031	15.3614	17.3735	6.30684	9.0309
1032	9.21994	60.9783	17.5377	12.904
1033	21.1538	29.7572	7.20438	13.3285
1034	16.5773	34.3429	6.81793	9.55117
1035	12.0623	43.2452	11.2984	12.9615
1036	11.461	50.7046	6.95815	13.3579
1037	9.09549	31.9918	5.94608	11.3427
1038	8.71779	30.5691	6.72485	12.0296
1039	6.40208	41.5319	9.69383	10.1277
1040	6.38038	53.6884	45.5689	10.2457
1041	20.3946	44.4295	7.0129	24.5719
1042	26.1926	39.5164	7.24821	19.6188
1043	13.8362	16.7111	6.84088	11.8758
1044	11.2397	23.6048	7.78894	14.5716
1045	12.7199	51.3014	7.23731	16.0267
1046	12.2358	25.4831	8.06486	23.8989
1047	9.26398	26.0919	7.96526	15.3821
1048	7.59699	21.6699	13.1131	11.1005
1049	18.2956	49.6213	10.3636	12.2506
1050	11.3129	57.3103	5.31156	14.1625
1051	8.34123	17.68	7.02857	31.6741
1052	10.127	17.7588	5.48254	16.8374
1053	11.4655	20.0695	9.02516	14.4975
1054	9.0408	24.6588	8.89619	30.5259
1055	7.4886	32.7554	11.7336	18.2233
1056	9.40787	20.2216	11.5474	137.196
1057	8.75046	27.77	9.20125	15.371
1058	10.5753	28.247	11.9421	60.5191
1059	11.7807	17.4769	19.727	9.67037
1060	11.0236	21.6815	9.42643	10.9758
1061	9.68823	38.818	11.7745	11.6849
1062	9.22368	26.1437	13.745	11.8472
1063	8.86299	28.6379	21.38	12.0952
1064	9.64198	20.5365	23.5908	14.2281
1065	15.6142	14.9137	17.888	9.11531
1066	12.2521	19.1626	9.53571	11.3718
1067	10.4148	27.4919	9.65962	17.7092
1068	13.5843	18.6908	11.568	20.5702
1069	12.1884	23.4736	11.2718	20.3084
1070	21.3297	18.4882	20.395	19.2032
1071	11.7002	28.9794	12.7291	39.4761
1072	17.6693	20.4773	18.6404	11.0637
1073	8.24346	20.7989	16.049	28.857
1074	8.15406	32.2879	12.3433	12.1357
1075	10.6463	22.575	15.484	11.8515
1076	10.8311	85.5441	14.6486	38.9046
1077	7.22599	28.8827	11.3193	10.4575
1078	6.69381	20.7115	20.7911	14.5639
1079	8.99645	22.039	12.0841	22.5582
1080	7.30355	21.152	12.5221	15.968
1081	9.06897	39.1596	10.3374	22.4075
1082	9.2346	21.5176	19.0503	22.9888
1083	16.5459	16.1217	21.7071	14.7528
1084	11.3941	19.7627	26.4465	11.2627
1085	10.0448	21.5276	21.5149	9.27059
1086	9.22696	57.0806	20.8729	9.15362
1087	10.4251	24.3453	32.6798	10.8195
1088	8.907	47.6861	11.306	11.4571
1089	8.90264	46.6164	41.9277	12.0521
1090	11.0424	14.6608	14.1571	11.0422
1091	6.87923	20.9009	17.083	13.2287
1092	7.1537	22.0324	17.7986	31.0455
1093	7.17297	22.9776	22.3317	23.6971
1094	15.2456	65.9316	27.4188	8.88851
1095	7.02521	21.0133	48.1608	8.69464
1096	9.5276	19.9953	65.511	9.0285
1097	8.94472	32.6597	9.68304	13.6667
1098	9.36667	35.6845	7.55425	12.3802
1099	16.2443	22.7852	10.3244	11.8469
1100	12.3547	28.5047	24.6687	9.10522
1101	11.9641	23.1149	6.73338	10.3387
1102	8.99541	16.5451	25.5787	20.974
1103	11.0746	28.3946	18.7628	12.6144
1104	11.8946	24.3479	23.6635	14.3832
1105	10.625	16.6955	32.2252	21.6724
1106	7.9708	54.42	20.1643	24.5511
1107	9.85286	39.7856	35.01	11.5321
1108	10.6791	22.5214	86.2484	26.1729
1109	9.54783	35.742	6.95197	9.05503
1110	8.37741	35.0498	4.87963	10.4535
1111	8.52083	28.3516	7.06937	32.0092
1112	9.52823	31.7565	6.98852	35.2364
1113	12.1977	32.1771	6.739	24.7167
1114	14.4163	26.0735	7.25914	27.1667
1115	18.7023	18.925	7.50369	10.0526
1116	14.7096	16.6046	6.89574	12.1449
1117	9.3545	16.8985	8.41813	35.0207
1118	7.79614	22.336	7.68563	33.368
1119	7.62355	22.749	9.97301	39.5643
1120	8.37554	22.7932	10.5406	16.0924
1121	7.55169	28.2963	9.31171	9.19166
1122	7.65088	19.8667	10.0759	9.4652
1123	8.16079	16.9863	11.0084	12.9347
1124	8.80589	17.4971	17.7407	11.4016
1125	8.98757	25.399	10.6938	16.2073
1126	6.73094	21.1138	44.0181	9.8588
1127	7.51169	25.7746	13.3714	10.0602
1128	10.8233	20.0122	7.50115	10.4264
1129	8.92758	35.1438	7.29084	11.3264
1130	11.3289	33.0458	7.90537	17.6789
1131	10.7426	55.3419	23.014	17.5348
1132	9.2933	19.9915	7.97845	9.6739
1133	6.0137	19.0849	8.61802	16.2384
1134	7.2077	19.8588	8.66516	12.2788
1135	7.53682	20.4153	9.05816	14.0085
1136	7.79792	21.3686	13.3995	20.0853
1137	6.96953	25.7754	7.50148	9.73255
1138	7.80263	25.4906	9.2922	14.7497
1139	8.32679	23.8065	9.10659	47.3806
1140	7.07571	48.463	8.24976	26.9839
1141	6.92627	33.7493	8.24354	14.4281
1142	7.78418	64.7133	8.41696	10.6592
1143	10.8634	36.7252	7.95861	13.2061
1144	13.6519	20.8113	9.99392	11.9953
1145	14.6314	25.9746	11.8315	21.4275
1146	15.2428	25.6596	17.7761	46.9373
1147	13.3757	24.356	10.2803	36.4306
1148	7.53644	36.9527	10.6577	9.68102
1149	11.211	30.1845	8.69214	14.9169
1150	8.17665	36.4728	12.8966	9.81176
1151	11.8103	77.8766	10.6321	10.8852
1152	10.9948	74.3274	18.6653	34.8594
1153	9.99361	33.7391	9.72662	34.3119
1154	7.90303	60.5712	13.4175	10.6334
1155	6.76411	22.8751	8.93032	10.3384
1156	8.4703	45.8525	8.65134	10.8002
1157	7.93139	48.1856	11.1161	18.8131
1158	8.83155	25.0033	7.42838	28.16
1159	10.4928	71.4679	10.2293	32.3755
1160	9.03856	26.9548	24.1834	29.1165
1161	9.04073	32.09	30.2571	22.439
1162	16.3799	45.6213	14.5171	9.53113
1163	8.84946	17.5331	11.8729	9.98654
1164	6.03929	23.9581	26.4118	11.3543
1165	8.67321	19.5158	10.9697	10.1204
1166	13.1103	20.244	14.7675	10.333
1167	8.91188	31.047	11.2711	9.35077
1168	10.082	24.2402	7.69153	23.4575
1169	19	18.7077	9.04956	45.0213
1170	21.9834	16.7193	12.3291	43.8923
1171	11.8732	25.1153	7.87762	15.1307
1172	8.5552	16.6003	8.99196	12.9032
1173	10.0113	22.2388	9.94227	14.2185
1174	8.35026	32.1546	9.97072	12.8431
1175	9.90931	22.7002	14.6894	10.0981
1176	7.47612	24.9632	12.7788	27.0167
1177	12.7368	20.2387	9.67972	14.3985
1178	25.7123	23.5867	10.8241	19.757
1179	20.2634	29.9727	9.41958	13.7482
1180	10.5196	23.4427	7.11325	8.9907
1181	11.4262	29.4622	14.3868	9.59936
1182	20.0376	19.9748	11.0561	23.3382
1183	11.0503	15.5862	13.6348	18.4864
1184	16.506	26.5405	10.471	12.3578
1185	13.1905	26.8027	7.64075	11.6867
1186	20.8929	29.661	12.1548	12.3928
1187	10.5784	41.9928	10.1078	27.3792
1188	20.2047	36.432	19.594	24.4919
1189	23.8831	77.9701	12.9006	10.0498
1190	13.0362	24.9458	9.401	10.7798
1191	16.4062	18.2667	8.5	8.98316
1192	19.8397	16.3938	6.10354	9.50607
1193	13.3251	15.4478	7.90105	14.454
1194	12.8884	15.7333	12.7752	11.608
1195	14.5204	19.0413	9.3513	11.6965
1196	8.78261	18.4086	7.93127	19.3333
1197	11.9027	18.7396	8.63486	26.0059
1198	10.7018	16.2971	17.5172	18.8704
1199	19.6267	29.1746	11.8856	51.9638
1200	18.7644	18.0684	7.19298	10.7452
1201	8.94608	15.3651	16.4026	15.1643
1202	7.07715	20.9816	5.55899	11.3798
1203	8.32303	21.6128	9.25068	11.4954
1204	13.4418	28.7475	6.84574	17.3814
1205	7.69449	34.1677	7.55453	9.78186
1206	8.8449	21.2473	7.33824	10.5351
1207	6.56448	32.6705	13.6627	19.1292
1208	6.68079	61.2184	5.02172	16.2375
1209	7.33536	36.5336	5.92527	11.4354
1210	7.1846	48.801	6.30446	23.0533
1211	7.63118	67.1255	7.60668	16.0411
1212	7.04382	31.751	7.18519	18.9821
1213	8.10476	45.0546	6.73168	10.3211
1214	8.56032	36.8296	14.9311	9.65423
1215	10.5476	21.3072	7.39349	10.6869
1216	12.5085	31.2964	8.0259	31.5011
1217	13.9139	21.8398	7.60169	12.113
1218	16.9145	31.53	7.20956	13.3416
1219	16.3447	33.2627	6.05251	34.8048
1220	22.1871	28.8803	11.1031	11.7336
1221	17.2297	26.2078	6.54202	10.7463
1222	9.30952	33.1942	7.43497	22.1991
1223	8.99561	16.9538	7.27077	44.4125
1224	7.67516	20.5565	7.49618	14.0437
1225	6.81367	42.8969	7.34566	22.5328
1226	7.72343	31.0767	8.29972	21.761
1227	14.2933	39.2597	7.18961	13.4675
1228	13.1068	48.1126	8.33658	10.5612
1229	10.0446	28.5595	7.20032	22.5609
1230	21.9954	28.1422	7.56283	25.834
1231	10.6239	56.7789	8.8803	9.28446
1232	15.6721	27.201	7.21114	10.9627
1233	28.5308	24.0309	9.10756	15.3189
1234	6.2842	22.8381	5.96595	14.2186
1235	7.41391	19.6	7.86924	12.2276
1236	9.67098	32.3259	11.2978	48.9646
1237	6.79749	28.766	11.2293	13.9194
1238	6.55982	19.1343	8.64068	12.1735
1239	6.86825	18.9836	10.2951	12.1787
1240	7.99699	21.7214	19.7753	10.5051
1241	6.83402	36.3406	12.1555	11.9335
1242	6.44236	32.0543	8.43312	13.4338
1243	7.46535	49.009	7.16284	12.0886
1244	9.01697	49.0668	20.8829	10.4115
1245	7.42328	24.3314	23.4272	14.0736
1246	8.20649	41.4109	13.2263	11.8985
1247	10.1827	48.4004	16.4192	10.4095
1248	11.907	22.1002	14.317	10.4966
1249	25.9435	73.2329	8.78959	14.0405
1250	30.1498	31.1822	10.5371	10.6379
1251	7.75521	52.7613	9.23239	21.277
1252	9.08023	21.1156	10.0376	11.5373
1253	6.98498	26.6363	8.36911	18.4219
1254	7.0625	21.7508	12.4677	10.9638
1255	8.465	35.5997	7.37645	17.3107
1256	7.90792	57.7554	8.31818	11.2155
1257	14.7225	83.5587	7.00911	11.012
1258	13.5605	27.928	7.37767	21.311
1259	12.92	27.4544	8.09931	9.54234
1260	7.75163	31.5511	9.67769	10.8272
1261	7.80293	34.161	5.02876	10.7678
1262	9.156	44.8104	6.52783	13.5767
1263	9.22955	36.2672	7.38522	26.9418
1264	20.2251	91.1359	9.39531	11.6931
1265	14.3875	32.2548	7.93103	10.6149
1266	7.91445	49.5742	8.0523	12.2362
1267	11.5304	33.5763	5.97344	9.28635
1268	22.41	70.9837	5.74859	8.56826
1269	8.91483	37.8266	8.53356	8.59542
1270	7.11257	158.035	7.97781	8.93945
1271	10.8353	27.1063	9.01278	8.90786
1272	7.81575	26.7021	11.9038	9.92923
1273	8.54026	32.7556	15.5529	18.48
1274	7.08715	30.0522	8.76646	13.4448
1275	9.04173	33.7913	9.27045	49.7007
1276	7.72831	36.4325	10.2407	33.6712
1277	9.07232	55.8747	48.8095	34.448
1278	8.56177	23.4603	9.49895	27.5397
1279	10.0569	32.5372	7.90857	18.9358
1280	7.25604	58.4242	9.18128	22.3818
1281	8.53107	18.3252	8.49814	9.55789
1282	19.7857	19.9118	7.36714	9.15035
1283	23.7511	32.8939	7.94272	10.942
1284	17.2907	20.0526	10.1588	18.1959
1285	12.0325	35.5646	8.67641	36.8721
1286	7.06575	50.7586	21.3892	19.334
1287	8.51713	40.3325	16.2935	14.0786
1288	12.7101	51.2991	5.6822	11.8437
1289	10.5673	24.0126	25.8281	12.6564
1290	19.9461	36.0025	7.82794	26.2055
1291	24.3512	27.2663	9.45701	9.59895
1292	14.2882	64.5968	8.14069	9.74668
1293	32.04	29.3853	10.94	8.74834
1294	18.0857	48.784	11.9199	10.1156
1295	14.9604	41.5479	35.0623	9.47624
1296	28.0087	38.3387	13.3836	12.4803
1297	11.6557	25.1136	19.4727	10.4384
1298	6.83775	37.6617	7.39649	9.7055
1299	6.00178	30.8956	9.91155	11.2731
1300	6.74595	32.302	9.51774	11.5341
1301	6.70784	18.7507	11.5054	11.9739
1302	6.59876	39.0684	32.453	13.7585
1303	8.1342	55.7269	26.723	11.8444
1304	6.44287	23.9617	10.2945	10.1149
1305	5.48914	23.5069	12.3961	10.3211
1306	11.8857	75.273	15.3657	10.2324
1307	7.78748	28.0711	9.30052	26.3022
1308	9.09605	66.6587	11.2278	11.1018
1309	8.65909	20.8108	9.78984	10.2811
1310	23.3489	30.0744	14.4878	9.38412
1311	11.0961	19.8436	9.92428	9.37121
1312	8.87731	31.9416	8.83163	13.7168
1313	7.30186	57.8692	9.01831	9.2069
1314	8.18722	49.8768	13.2956	8.83439
1315	7.2633	93.5229	8.40984	9.02136
1316	7.80746	73.5228	11.4245	12.499
1317	9.32623	22.7019	13.5733	10.0196
1318	12.5124	22.7099	7.28499	16.7452
1319	9.4098	22.9538	8.45699	9.94494
1320	9.64032	79.3667	8.01396	9.71996
1321	10.4723	42.1192	10.0905	9.16464
1322	10.1693	26.1099	8.48635	13.3996
1323	7.53349	21.9319	7.23016	22.3352
1324	6.99243	32	9.00671	18.6595
1325	6.75348	52.5891	8.13497	12.6125
1326	6.44108	49.4779	12.7265	11.7486
1327	7.32584	27.9221	10.3263	14.2636
1328	7.7	29.3081	6.90476	8.98124
1329	7.54156	23.3208	5.71705	12.225
1330	18.3076	28.9528	8.04545	24.4721
1331	12.1257	24.1297	9.89663	10.6995
1332	7.75383	24.4591	9.36	10.338
1333	7.19847	23.7099	8.66514	9.93508
1334	8.18054	20.2408	8.77815	9.23323
1335	7.50224	23.0879	11.1537	11.25
1336	9.17181	22.8742	8.75778	10.1838
1337	7.40492	28.5116	9.74863	15.2827
1338	7.44963	27.4385	11.1464	11.5792
1339	10.7355	22.975	9.64561	19.3606
1340	8.86588	26.9805	5.31543	30.1765
1341	8.78822	21.322	5.54606	15.0617
1342	11.0134	23.041	7.81574	14.8953
1343	10.8659	29.7931	9.34923	23.1876
1344	21.5188	36.3891	11.0881	24.7344
1345	9.15804	23.7444	9.60651	15.0874
1346	8.55423	26.9778	9.50734	9.95837
1347	11.7435	26.8352	10.5663	21.2945
1348	11.9718	22.6708	10.9157	9.62914
1349	9.39072	32.5256	7.23488	9.05064
1350	9.0449	20.0711	7.45233	9.58682
1351	9.13276	51.131	9.51677	9.29868
1352	11.9054	29.6649	19.2086	9.95076
1353	15.0888	69.8884	6.92223	12.4444
1354	19.1239	20.7706	5.63138	29.8445
1355	6.63547	24.2269	24.8501	12.0385
1356	9.03096	47.769	13.1599	12.1913
1357	11.5516	37.3953	12.1765	12.3627
1358	9.73732	33.1566	10.636	13.2067
1359	9.36011	37.7129	8.89229	8.74864
1360	14.6267	20.9525	6.98109	9.27789
1361	11.4752	19.8048	29.9553	9.91163
1362	10.0088	34.8419	10.5431	9.54613
1363	10.2778	25.0755	12.6769	9.14229
1364	11.1169	51.9219	14.9724	9.68338
1365	6.63969	18.8847	8.74611	12.7556
1366	6.63524	17.2094	9.44725	9.6505
1367	8.85488	29.3035	11.2025	9.67245
1368	7.7358	16.1592	12.2356	27.3673
1369	8.1768	18.8289	14.8337	22.5053
1370	11.1964	16.9174	11.5842	9.52013
1371	8.87081	16.8146	8.69953	9.43892
1372	8.76247	24.6678	8.25249	23.328
1373	5.60486	28.4763	10.2847	12.5355
1374	7.11324	20.4251	9.47329	12.8282
1375	7.2439	26.0584	8.21422	9.51675
1376	7.89898	33.6648	8.03735	9.32016
1377	6.33208	20.9318	7.62924	9.9384
1378	5.66273	25.9098	8.91462	8.75881
1379	6.55228	23.8724	8.3358	9.4585
1380	7.6167	27.6075	9.39835	9.31241
1381	9.52283	21.0751	9.08619	8.94622
1382	7.22467	18.52	10.7058	11.4755
1383	7.35179	22.8103	7.61103	9.60134
1384	15.054	23.2467	7.65372	22.1164
1385	8.88448	47.5754	9.41837	18.7282
1386	10.3607	25.1049	11.496	13.8707
1387	6.79405	22.7007	9.05246	10.1631
1388	6.65859	23.2364	8.36293	9.43069
1389	8.20628	21.8275	11.6764	9.41445
1390	8.64554	31.0403	14.1153	10.7967
1391	9.65827	22.5205	10.0343	9.63861
1392	9.49598	19.772	10.1722	13.3497
1393	7.96636	27.506	9.39859	12.7838
1394	9.59745	29.5021	7.37864	13.0223
1395	12.9875	19.5038	10.9367	31.3267
1396	11.6821	27.433	9.13501	31.1272
1397	8.78756	24.3913	12.1762	10.8603
1398	7.15679	22.8984	11.1165	9.57378
1399	22.7018	68.0382	8.34929	9.5953
1400	21.4993	27.4795	9.20304	23.4026
1401	11.5145	28.8687	5.48564	10.5912
1402	8.31551	35.0641	5.35373	18.0323
1403	7.63774	52.6556	7.04557	9.60248
1404	7.36861	99.3951	7.64264	11.6663
1405	10.2508	33.0343	7.83531	21.7583
1406	9.90493	84.249	7.86993	12.0307
1407	10.1959	42.4995	8.73496	11.6909
1408	7.45763	24.3553	9.82644	9.9173
1409	6.99875	29.2559	7.39466	8.85725
1410	21.2645	54.3202	7.82129	9.50786
1411	11.2483	27.8766	8.79487	9.05272
1412	8.16253	30.6612	7.9725	8.83266
1413	6.9413	25.5695	7.44877	9.22015
1414	7.58967	93.7159	7.61839	9.11684
1415	8.35764	171.717	7.30872	9.57609
1416	12.9079	94.0998	7.36353	11.8104
1417	10.0331	88.6778	6.13636	11.5271
1418	17.537	50.496	7.31885	17.2868
1419	10.2691	48.3036	5.29516	22.8707
1420	12.3323	58.2711	4.68872	14.2262
1421	8.83019	36.1037	8.60538	11.1481
1422	8.941	17.9322	11.622	11.8304
1423	8.79808	18.5616	7.57989	16.3369
1424	7.29241	19.2273	11.959	15.3367
1425	7.57517	29.2776	12.1052	15.1841
1426	10.0901	43.2468	9.35521	13.6075
1427	21.0133	15.1348	8.26128	9.83159
1428	10.7863	20.4441	8.45106	19.3214
1429	8.69687	35.3764	8.16554	14.6223
1430	12.0347	29.3212	7.15651	14.5749
1431	8.20551	23.7222	7.06085	11.0506
1432	6.2969	35.3261	6.77086	12.5281
1433	9.08314	31.2925	12.4924	9.62319
1434	11.7717	38.0726	20.9093	8.89273
1435	12.86	28.2443	10.2543	12.3074
1436	11.7756	19.7172	10.9029	9.19444
1437	12.5781	27.1638	11.9473	10.0477
1438	7.18698	20.9958	10.3143	9.13597
1439	12.2534	23.2057	7.54665	9.64954
1440	16.3128	22.9682	7.81078	10.5722
1441	18.7877	45.3571	7.42857	14.329
1442	7.83861	19.5671	7.41514	9.4563
1443	8.2698	18.8287	9.57318	14.8427
1444	7.47341	21.6068	8.81315	9.07088
1445	8.59488	22.8389	12.5264	11.437
1446	8.93572	30.7029	10.5273	22.2896
1447	9.24147	20.562	13.4971	10.9237
1448	12.4621	23.9915	10.458	16.993
1449	9.40234	19.4411	8.26797	16.4975
1450	15.3478	20.5247	12.6091	17.9007
1451	12.1507	22.8486	9.25854	9.53327
1452	10.2366	22.5174	6.25543	9.02712
1453	9.57553	24.7787	6.63736	11.102
1454	8.92176	20.533	8.87886	11.3039
1455	6.42303	70.5897	10.6132	10.4443
1456	12.8247	23.5546	7.52957	14.4217
1457	18.4118	29.1814	7.23298	13.2437
1458	11.5106	21.8174	8.32858	14.314
1459	7.90909	23.4048	10.1523	9.24289
1460	9.38998	32.028	13.3434	16.21
1461	9.29461	23.1613	13.2212	12.427
1462	7.84632	29.6977	9.40244	20.9436
1463	8.37189	38.0456	12.2389	12.2101
1464	13.344	26.7503	8.01235	10.02
1465	8.27024	23.3254	7.10574	10.6502
1466	7.90257	19.7804	6.94448	19.3671
1467	7.22502	22.4986	6.76854	21.3419
1468	18.8014	34.265	7.75537	8.96082
1469	9.68256	23.4799	11.3282	11.4424
1470	7.61761	31.2147	16.7915	10.2005
1471	11.79	24.0068	10.0249	9.9585
1472	8.92317	19.6124	7.44792	9.08333
1473	11.2803	23.7346	6.99574	14.976
1474	7.68344	74.3328	8.09431	12.3372
1475	9.18421	45.138	8.70494	9.43029
1476	9.60778	26.9398	7.58182	10.2097
1477	6.69847	40.9608	6.35598	11.247
1478	7.99364	25.8559	6.51656	9.41972
1479	7.38632	22.585	8.31006	10.6881
1480	10.7075	30.4043	6.70572	10.3733
1481	6.50703	20.279	12.1199	9.40109
1482	7.32908	57.5502	9.62353	11.2656
1483	7.42568	48.1674	9.39072	22.6978
1484	6.40996	61.0982	7.65221	9.3301
1485	7.84641	55.9046	18.5723	9.59828
1486	10.6266	32.4587	11.2829	13.7283
1487	10.4872	33.1695	9.00305	12.6996
1488	15.3187	21.0233	8.78407	9.62967
1489	10.2066	86.5935	10.4811	10.0514
1490	17.2867	38.0082	12.678	11.5127
1491	9.04162	19.3843	8.08826	11.9986
1492	6.7395	19.777	6.76891	20.9757
1493	7.71501	30.851	8.05459	27.1238
1494	7.13725	34.1258	8.93043	32.8517
1495	7.1393	35.8395	9.06988	19.9562
1496	7.27655	49.0694	6.35849	13.196
1497	7.24882	71.6114	5.95115	15.1826
1498	7.91895	80.3462	7.93872	14.457
1499	24.0107	62.125	6.24811	14.3619
1500	16.0646	28.7035	6.88898	30.49
1501	8.22311	20.2383	6.72776	19.3738
1502	8.27928	19.9656	6.11943	36.1957
1503	8.71654	17.4443	6.67613	11.8759
1504	9.81888	20.3815	13.0796	12.2308
1505	7.33653	63.6921	11.8918	9.61238
1506	6.2112	18.3107	6.96517	12.8675
1507	8.04103	27.6317	17.3895	19.0019
1508	8.08241	25.1234	15.1882	14.9407
1509	11.7615	64.7571	10.9195	16.3468
1510	9.52828	29.2359	14.9225	9.39179
1511	9.01632	27.4954	10.4934	21.6251
1512	10.1814	22.0816	7.34321	16.3404
1513	10.1568	18.3106	14.6489	11.9887
1514	14.2673	24.1693	13.5086	12.4753
1515	9.14244	21.4068	11.6997	20.0223
1516	10.4201	19.4134	10.7812	33.581
1517	15.0427	24.8651	8.46067	15.1544
1518	13.3647	35.4654	9.23545	12.1801
1519	19.4133	31.6562	8.95556	13.9667
1520	12.5669	25.6574	7.11424	18.8991
1521	9.64673	35.6771	7.02505	12.9115
1522	10.6176	35.9463	9.98373	22.9851
1523	11.7216	48.4442	10.0343	15.6871
1524	7.96497	38.9505	8.04393	13.5694
1525	10.853	27.5009	6.87758	17.7299
1526	10.573	51.3951	16.694	14.7211
1527	7.17483	79.9708	9.52993	12.8578
1528	6.88907	45.4107	7.66275	11.7788
1529	8.20619	34.196	7.84787	10.4596
1530	11.6627	26.8167	6.47066	10.7878
1531	6.7424	27.3699	8.01328	9.52261
1532	7.76352	35.9922	11.2741	11.8391
1533	16.1936	23.3591	6.87603	9.53795
1534	8.3865	24.0903	8.8	12.213
1535	13.8185	29.5979	11.4253	11.2046
1536	13.8492	48.0221	7.51933	10.1818
1537	14.9527	32.936	7.8966	11.4787
1538	20.8027	28.8412	8.52231	31.9556
1539	11.4672	32.056	7.7304	18.1214
1540	7.5865	37.722	7.48214	55.7145
1541	7.57746	39.8375	11.8078	11.7264
1542	9.87872	20.6993	8.46178	13.0699
1543	14.9641	21.5427	7.27245	11.5231
1544	14.4784	28.2014	6.19735	9.81156
1545	11.5959	33.513	14.1641	10.4947
1546	14.0411	30.0674	6.34695	11.2505
1547	22.7615	27.9697	29.8674	12.8557
1548	10.1992	22.5647	13.8213	15.2725
1549	8.40355	35.4354	6.8313	19.243
1550	11.1935	25.2434	5.59513	14.4748
1551	6.48538	42.3363	7.32274	22.293
1552	5.16667	34.0259	8.19709	21.1322
1553	14.5574	22.6195	8.1235	11.1462
1554	8.68653	36.6526	7.31384	10.7513
1555	23.3601	26.5778	7.0481	20.406
1556	22.8485	39.2686	8.19001	12.8046
1557	6.59366	26.0063	8.46261	14.1891
1558	11.7527	31.0475	6.33975	12.8523
1559	12.8668	45.5928	7.7619	11.8843
1560	11.5872	31.0448	6.95358	12.1086
1561	22.9705	26.2637	9.8314	13.1725
1562	10.0013	40.5424	7.62237	23.9286
1563	8.04799	36.7468	5.99786	10.0497
1564	24.0716	30.0936	11.0563	12.2125
1565	28.7713	28.5488	7.01998	11.4304
1566	11.1857	31.7303	7.75732	12.7699
1567	33.684	38.493	7.07809	12.8969
1568	53.7489	33.3773	8.59512	10.4809
1569	16.312	25.4305	5.38956	11.1092
1570	18.5664	21.0099	7.66384	9.98573
1571	21.5034	23.0266	9.48853	10.0694
1572	10.6264	25.6349	12.7845	11.5236
1573	8.30172	17.9575	9.08887	12.0855
1574	12.1285	32.1846	5.61502	12.7745
1575	12.7239	25.348	6.32767	10.5451
1576	9.48011	24.0406	6.48802	14.8071
1577	10.6168	24.7193	9.8067	11.2258
1578	23.8587	31.7182	5.39527	11.8699
1579	12.407	30.9743	13.6968	11.7692
1580	14.7598	38.2637	5.32136	11.7943
1581	13.034	18.4917	5.56245	11.3664
1582	10.7711	17.89	5.51885	10.3022
1583	17.7635	41.978	6.3623	9.94374
1584	14.0103	28.0997	5.66551	10.7527
1585	9.20732	17.1954	6.05263	11.9558
1586	7.91297	25.3223	9.25363	11.0072
1587	10.8554	19.8597	12.4614	12.1867
1588	5.66807	22.4195	8.80908	10.259
1589	7.61552	74.2569	6.76536	11.4055
1590	7.79888	23.3005	8.10327	42.468
1591	9.44913	39.347	9.50672	12.9543
1592	14.1111	30.6005	7.12235	12.3981
1593	14.3069	49.7904	9.19286	21.1278
1594	23.365	33.046	7.10515	12.0244
1595	11.2477	38.3971	10.9193	11.4664
1596	16.6332	17.9718	6.01589	11.4821
1597	24.0481	18.9093	6.30039	12.3737
1598	15.4679	26.8886	7.35517	11.3127
1599	13.048	23.0791	5.45734	18.642
1600	10.8583	46.8974	6.66947	9.38895
1601	18.886	19.9529	5.87768	10.7355
1602	16.1871	23.5	7.07182	20.7766
1603	12.9047	20.6278	12.0813	10.6778
1604	8.27186	28.2081	20.8348	9.60784
1605	8.79447	19.499	6.41297	11.053
1606	9.66979	20.0623	6.80958	10.2059
1607	9.75912	23.7208	5.96974	12.7275
1608	12.6272	37.856	6.69284	14.265
1609	20.5971	23.1631	8.29359	11.7072
1610	12.672	27.4148	8.15579	11.9503
1611	10.869	18.4935	6.93289	11.0629
1612	6.78788	21.5383	6.97917	19.9919
1613	8.34046	23.5539	7.43969	10.2704
1614	12.1517	21.4828	6.75892	10.1733
1615	9.91837	21.4903	17.6648	35.6368
1616	11.3318	29.9267	21.3246	34.6159
1617	10.5168	24.1726	15.5738	11.4389
1618	9.01373	20.8869	8.35448	10.4784
1619	10.3121	25.2627	9.26393	9.89492
1620	15.2365	23.3627	9.20382	9.68148
1621	13.7222	33.1648	6.57162	10.6393
1622	6.16488	23.3051	4.95087	10.0125
1623	10.6323	23.5072	9.08036	14.6859
1624	7.48161	17.06	8.42112	10.5806
1625	9.93981	20.8869	17.6871	11.6842
1626	8.7269	25.2431	6.29983	11.8868
1627	8.04419	31.3028	5.18467	22.6814
1628	8.55068	36.6922	5.22164	11.67
1629	8.40214	50.1398	6.16238	20.7071
1630	15.4058	19.1327	6.26737	12.0567
1631	11.3135	20.1052	7.81488	10.2921
1632	9.2524	23.6748	9.05306	10.9162
1633	9.59533	17.9431	7.43917	10.3055
1634	8.59477	25.3872	5.36493	13.3621
1635	7.89799	20.7374	7.19027	10.9307
1636	7.80397	22.8561	7.4414	23.0591
1637	12.376	23.1631	8.17548	25.4264
1638	14.8616	18.4579	6.95736	10.8761
1639	10.4012	25.4851	5.08605	10.7881
1640	12.1526	31.2401	5.99162	20.3147
1641	15.164	22.4085	8.39454	14.6032
1642	13.4232	19.3919	8.58198	16.5523
1643	9.12488	17.0548	7.36706	23.1113
1644	10.5757	26.7589	11.0985	22.6741
1645	8.34751	21.553	14.6038	18.6728
1646	7.17292	21.0707	9.66719	13.1145
1647	16.4081	21.4054	12.9849	16.3333
1648	10.7594	18.1853	8.5633	16.2496
1649	11.8514	19.888	6.76828	12.6821
1650	10.2781	17.1891	8.01237	9.9316
1651	9.2488	18.3617	8.61209	12.5105
1652	7.79733	19.8535	13.1776	10.2648
1653	11.6165	21.0228	9.3516	24.6186
1654	8.92656	20.6295	20.6193	15.1775
1655	11.3238	18.7383	17.4177	10.3417
1656	9.1706	17.0796	24.5418	11.0255
1657	6.33186	16.7784	6.97199	11.2543
1658	9.36282	20.739	71.2587	11.5008
1659	9.79943	20.5332	26.4561	13.4
1660	6.49654	17.8851	11.5253	15.9172
1661	13.4423	21.2471	55.4994	26.462
1662	8.49178	35.9892	25.2893	11.5075
1663	7.9429	23.514	10.3653	16.6781
1664	7.08197	22.1433	8.7175	10.9882
1665	8.62455	44.7576	11.3759	16.8401
1666	6.74013	29.8596	16.2748	11.1239
1667	7.31234	32.5424	10.5689	15.2031
1668	9.69214	19.6429	5.70204	11.7381
1669	8.73791	20.9344	12.4907	13.4985
1670	7.47561	20.7608	7.28321	12.1906
1671	9.17028	16.5781	15.2681	10.4782
1672	9.41412	17.3424	20.2504	11.0782
1673	10.0284	19.6211	8.23916	11.4192
1674	7.6993	21.8097	11.5103	10.8642
1675	8.71344	34.1421	14.1908	13.9958
1676	7.99348	16.3015	15.7669	14.9692
1677	7.3777	17.6684	14.0532	12.5401
1678	8.73956	35.6786	18.7121	11.0145
1679	7.3779	22.6426	16.464	12.6449
1680	8.15875	38.2107	5.9925	10.2773
1681	7.25825	20.679	13.279	9.7503
1682	10.0886	19.9707	14.4452	11.5703
1683	11.5681	16.8185	7.91062	16.2096
1684	10.6067	22.1842	8.60768	12.5457
1685	11.3016	31.5287	8.10038	15.6762
1686	28.365	42.698	5.94697	10.75
1687	9.10108	22.3084	5.98683	11.2774
1688	20.1097	16.8976	8.72399	19.9322
1689	13.1661	26.4668	6.0237	11.6348
1690	10.4317	19.4589	7.83838	14.8122
1691	9.50172	18.4021	6.36207	15.8453
1692	5.80863	18.3902	10.953	10.3289
1693	5.05345	21.4275	7.60433	10.919
1694	4.10051	22.2198	8.68788	10.3237
1695	8.4352	26.4251	6.70741	23.4707
1696	6.96933	20.8908	7.38674	15.4022
1697	6.28439	18.5411	6.92253	9.70492
1698	8.2519	19.1463	6.94776	12.6078
1699	5.78819	22.4419	8.55374	10.0684
1700	6.54928	25.6578	5.69388	35.7534
1701	6.62549	18.2535	6.54772	28.6764
1702	6.49483	19.8268	7.11151	14.3217
1703	6.02564	18.8598	6.53297	14.38
1704	6.60659	28.8256	9.54545	13.6681
1705	11.7533	31.7454	7.58856	11.4229
1706	11.2808	28.0765	11.2928	10.0296
1707	8.2795	35.7147	6.56201	10.4807
1708	7.90835	22.5781	7.37398	14.2196
1709	6.6423	24.4013	7.08384	11.3043
1710	8.40809	22.2767	6.74971	14.4908
1711	7.95158	18.1828	4.9554	12.3801
1712	5.97405	17.5817	9.57929	13.4418
1713	13.362	20.6092	7.0572	18.1647
1714	9.11715	19.6986	6.15216	10.1826
1715	7.03036	19.8592	8.23315	10.3943
1716	18.4286	36.719	6.11466	11.2233
1717	15.8594	25.3171	10.8254	10.2249
1718	16.2731	21.197	9.68441	11.5007
1719	10.3318	48.6416	9.46637	10.1544
1720	11.2892	38.0217	9.29212	10.3792
1721	10.9853	21.3943	9.21937	14.1587
1722	12.4971	40.3354	8.61979	11.1664
1723	6.19984	28.8729	9.89646	11.1173
1724	9.49206	29.1869	7.58245	18.8543
1725	8.15667	47.6635	6.60414	10.4729
1726	11.4406	23.8845	6.70117	11.1403
1727	7.97695	28.2994	12.8794	12.0357
1728	8.32	22.7752	6.44106	10.4678
1729	12.6777	29.8873	6.60211	12.3608
1730	6.71181	34.2093	6.51095	16.2603
1731	6.57911	28.5222	10.0633	17.791
1732	8.15335	28.5481	7.389	14.0463
1733	5.94478	27.2618	6.60474	10.8499
1734	9.527	21.0106	7.43361	13.3033
1735	7.22911	24.3399	6.70588	14.8459
1736	6.23348	36.7119	6.25799	11.9001
1737	5.00951	44.5047	8.35642	20.0632
1738	22.4019	32.756	6.02677	13.5501
1739	13.2214	30.3342	5.88689	12.2468
1740	4.75287	20.1036	4.59508	12.3785
1741	5.71391	88.6612	4.83171	15.2763
1742	5.36085	38.3766	6.1371	29.3499
1743	5.93854	78.491	7.77049	26.7016
1744	10.8585	59.4193	9.91869	29.8171
1745	11.2755	79.2466	6.16928	17.8553
1746	7.14591	32.9781	6.48442	12.1123
1747	11.9945	34.8478	10.9408	23.1264
1748	8.28757	93.2741	18.5189	11.5089
1749	7.22526	21.858	7.14128	11.3306
1750	5.60275	58.5091	20.6252	10.5149
1751	8.73351	54.3093	14.8259	10.4737
1752	10.0496	56.1611	18.0264	10.8689
1753	13.1774	48.1786	18.0215	13.2524
1754	11.1722	27.5232	10.9521	13.0968
1755	11.4464	26.1363	6.89028	13.1458
1756	11.8127	27.8031	8.05893	12.7486
1757	11.2112	67.2544	5.69886	12.8265
1758	5.92572	37.5421	9.04232	15.2437
1759	8.65612	30.6778	12.1598	33.4204
1760	5.54057	27.0096	7.63783	19.0233
1761	12.8036	28.3775	4.73491	22.5127
1762	9.20097	20.7687	6.66564	12.438
1763	8.28278	24.8883	8.88798	11.7206
1764	16.8864	35.6485	17.7652	10.6353
1765	9.62634	25.8284	5.45318	11.1861
1766	7.95297	23.2148	7.42105	12.2254
1767	7.40941	22.9707	6.31359	12.2617
1768	9.67372	19.8304	7.43622	12.0861
1769	9.59929	26.6878	5.45598	10.1965
1770	5.67705	20.2492	5.31479	15.0751
1771	8.54138	34.9039	5.63824	12.0691
1772	6.13605	55.7785	16.3799	10.7868
1773	5.99646	44.252	11.2068	16.4535
1774	4.72901	22.9351	13.6268	12.5156
1775	5.61738	30.1392	9.27599	10.821
1776	9.56579	20.4769	8.71659	12.6387
1777	9.80781	21.8531	5.45066	11.839
1778	10.6447	18.2384	7.90561	14.7553
1779	12.1614	33.234	6.64902	10.6823
1780	10.656	36.5969	6.69096	11.9236
1781	9.4947	26.4128	5.73114	11.4838
1782	7.07865	21.409	7.51239	24.6642
1783	5.16432	22.9175	6.28996	20.698
1784	7.3962	20.773	8.33985	10.8764
1785	6.6347	39.9542	4.90567	19.3662
1786	4.45959	53.4698	5.9325	11.0362
1787	6.15318	29.1716	9.1571	13.5323
1788	4.65391	23.076	6.66358	13.0406
1789	6.62794	26.3055	5.42941	29.0461
1790	6.89537	21.0897	5.50927	16.4012
1791	12.3953	26.4153	7.45434	14.5813
1792	5.05285	19.8608	6.56385	12.628
1793	8.05124	23.4709	6.61169	14.667
1794	7.27821	23.2891	8.71582	11.8592
1795	7.60685	19.5077	7.88196	14.5648
1796	11.6811	20.49	7.90145	10.6596
1797	11.5251	33.3329	7.25102	12.5926
1798	11.2016	29.1304	11.1086	10.3947
1799	9.52893	36.2972	8.74905	11.9441
1800	5.80743	18.8478	6.98357	10.4954
1801	6.02333	25.2146	8.81563	11.7688
1802	4.8494	35.2562	5.43782	16.7218
1803	8.11053	28.9283	6.47288	15.1062
1804	6.59528	35.9002	12.3129	13.1397
1805	6.57534	31.4778	6.5124	15.998
1806	4.65652	46.6349	19.2405	39.2337
1807	15.3087	34.7743	9.70055	21.1571
1808	14.5051	19.2027	6.07117	10.7148
1809	7.38323	26.3813	14.4169	14.5132
1810	6.74506	20.4837	7.437	11.5184
1811	7.24808	32.8152	16.2443	11.7348
1812	5.5689	23.7781	12.2094	11.3914
1813	8.42105	41.1905	8.2016	8.93246
1814	6.98859	22.6129	11.3748	10.8657
1815	5.88056	28.1796	5.35069	9.38157
1816	6.24447	19.2067	7.79496	10.3872
1817	8.46023	18.2626	6.84449	9.59567
1818	7.83803	23.7823	9.27009	9.56126
1819	9.60673	17.668	8.11753	9.76623
1820	5.00125	16.9859	8.22998	14.3091
1821	6.50847	24.8174	5.67244	12.2427
1822	7.06806	25.3359	8.62945	23.986
1823	8.0999	21.6855	6.7166	13.602
1824	7.35626	34.234	10.4879	18.775
1825	7.73354	25.6399	9.82827	12.0645
1826	8.46096	37.4541	8.76956	11.2506
1827	8.2847	30.827	9.5303	15.1299
1828	11.9268	22.7826	8.76398	10.9295
1829	7.71154	22.4507	8.61463	14.091
1830	7.32146	21.383	8.89681	9.92077
1831	12.5113	22.0469	13.7085	9.3324
1832	7.07108	20.3316	10.7428	10.3215
1833	6.81677	19.7857	11.2835	13.672
1834	8.21136	23.6814	8.22121	9.61672
1835	9.32621	22.2124	9.51224	9.52814
1836	8.76562	19.4283	8.27395	13.1776
1837	4.98389	22.0308	8.46674	13.1292
1838	9.71376	20.3843	7.6747	10.9193
1839	6.15946	20.2542	9.1252	10.7701
1840	7.33162	20.8111	7.64209	15.375
1841	12.0946	18.7519	7.68521	13.1892
1842	12.2235	23.6554	7.72663	19.1071
1843	12.1273	20.8966	8.02521	11.389
1844	11.3194	24.8285	8.08769	13.5521
1845	11.4808	17.3927	7.71554	11.4059
1846	6.90482	24.3552	9.89916	23.5995
1847	7.96099	22.966	14.0618	12.3059
1848	9.15497	22.2429	8	12.5584
1849	10.5092	17.7668	8.15895	13.5216
1850	9.37859	20.6898	7.93846	15.3509
1851	8.44058	18.7757	12.0715	9.92778
1852	7.71209	18.8836	8.06419	12.8359
1853	8.31063	18.3655	8.00823	12.9204
1854	9.11186	23.7687	7.79853	10.1777
1855	17.1575	17.9769	11.6685	10.1906
1856	7.98328	23.2229	9.25963	9.54755
1857	7.66358	21.6404	11.4056	8.92017
1858	12.9205	19.4867	8.77868	9.70229
1859	12.4031	16.9867	8.27115	9.39136
1860	11.0756	16.8049	10.373	10.1866
1861	10.6338	24.6746	9.85839	10.0191
1862	11.0916	21.8567	8.79149	10.2329
1863	13.4355	19.4892	10.1515	14.8163
1864	7.06231	44.4278	7.6712	24.991
1865	7.68212	45.0539	11.6101	12.3388
1866	14.152	26.1445	11.5421	11.9495
1867	7.95765	24.443	8.25312	12.3022
1868	8.90145	38.0827	6.86368	22.5169
1869	9.27101	23.9929	10.6685	16.5835
1870	8.97578	26.7264	9.81447	14.1155
1871	12.3904	30.2117	7.86943	16.3032
1872	9.30197	38.3476	9.82877	17.4417
1873	7.22599	20.6156	9.45248	13.5759
1874	9.00896	18.4155	9.99919	20.1148
1875	8.86121	22.6663	8.83068	11.1838
1876	8.11869	24.0411	7.73562	11.5803
1877	9.69874	49.1379	11.3961	18.46
1878	10.6999	38.8886	9.81747	10.7964
1879	13.7218	26.32	22.1343	10.0599
1880	10.9398	28.9871	6.82318	14.2511
1881	8.70664	31.7892	7.13491	12.1891
1882	8.03221	24.8213	8.23345	9.8624
1883	9.89804	23.1131	9.59006	9.74109
1884	9.28664	19.6385	11.7979	13.2448
1885	7.43811	18.0852	12.7289	13.0634
1886	6.80382	18.4811	13.2742	10.68
1887	6.26144	18.3104	11.0664	13.8327
1888	7.24776	19.8004	9.16202	11.2045
1889	7.0702	17.6293	9.1626	11.2327
1890	9.12623	22.7654	10.6091	15.3421
1891	8.45854	44.7193	13.9724	14.386
1892	6.86318	18.9507	10.3955	12.6173
1893	8.46732	19.8582	10.9163	15.7311
1894	13.4581	19.1931	10.4962	13.7363
1895	9.11538	19.3832	8.67547	12.3039
1896	7.18693	42.6834	7.40769	11.4544
1897	8.45889	34.4674	7.29453	10.5774
1898	15.6492	64.742	6.77236	9.8555
1899	13.098	36.8096	19.4549	9.67139
1900	9.4176	23.3119	28.754	18.6406
1901	9.22209	53.6299	34.1322	11.3707
1902	10.0563	21.2206	8.34286	11.3993
1903	17.6228	25.187	15.3359	10.2915
1904	11.2165	174.069	7.31807	10.8505
1905	8.09071	24.9448	38.9063	9.78063
1906	9.20044	26.6558	14.9675	13.179
1907	8.03796	30.7821	10.876	15.5542
1908	8.57143	28.1315	6.88055	12.0418
1909	6.32845	25.8907	13.3632	11.3388
1910	7.86026	20.4536	9.53265	10.3208
1911	7.73558	22.5505	23.8525	10.9098
1912	6.98623	29.3955	10.4658	22.7274
1913	8.18365	19.2323	18.8245	11.4637
1914	8.05809	22.4532	8.70659	16.5296
1915	6.86179	39.9088	6.39711	9.99305
1916	8.89647	130.362	7.27408	10.2504
1917	8.38853	166.856	8.21699	11.3444
1918	6.3973	56.6986	6.37909	11.3638
1919	6.5063	46.409	7.49041	12.4329
1920	7.01252	24.0259	7.22581	30.2565
1921	7.11048	30.6807	8.95713	10.854
1922	10.4521	80.2375	7.98788	10.2744
1923	12.5028	39.5138	7.70241	15.0308
1924	15.9636	26.6834	5.82199	9.97667
1925	15.0807	37.5516	6.55204	9.73063
1926	11.5571	39.6827	10.1741	16.2699
1927	11.7446	60.5655	8.39709	13.1833
1928	11.5569	37.392	6.98647	13.6181
1929	10.6379	24.0589	7.21935	9.62043
1930	11.4833	25.4184	7.71232	12.45
1931	12.6577	23.6636	9.25174	12.1809
1932	8.78308	17.0933	7.51724	13.6117
1933	10.1811	18.8986	6.49593	38.1752
1934	8.23077	19.4316	12.3013	10.543
1935	8.23562	26.8968	10.0724	13.6905
1936	11.1928	29.7667	7.20344	9.56008
1937	9.89416	28.8148	5.43876	17.1379
1938	16.7552	19.2275	6.84825	9.83273
1939	13.7744	42.7841	4.86795	21.5255
1940	7.42469	28.3297	6.66498	11.4209
1941	13.869	21.9335	5.96106	22.0092
1942	14.6957	26.8091	5.83651	20.6577
1943	44.6807	27.3401	6.16514	29.7054
1944	9.42992	42.541	8.66486	30.1964
1945	17.127	27.1614	13.2111	35.8287
1946	12.8211	38.5634	9.25187	19.3905
1947	12.398	34.3885	18.8191	15.2317
1948	11.0899	19.6635	9.01523	13.2999
1949	7.94444	20.8291	14.8465	29.1649
1950	11.0973	26.6898	13.653	12.7494
1951	21.894	24.1087	6.19361	23.0317
1952	18.3578	22.0999	10.4255	15.7677
1953	14.3448	24.2878	9.31404	27.7867
1954	9.54043	26.896	6.69493	11.1908
1955	14.0552	29.0095	10.1951	13.1456
1956	28.2155	29.6603	13.8936	18.3847
1957	15.0295	27.6743	9.5709	12.8872
1958	12.7821	92.1367	25.5863	37.6571
1959	10.0751	47.7874	25.5977	10.308
1960	13.3938	35.5352	23.9318	10.5052
1961	12.9271	18.9014	29.5223	10.1162
1962	7.53958	21.0221	13.7129	19.8849
1963	11.6284	33.7472	11.482	19.6107
1964	16.8036	47.8946	16.1867	33.3534
1965	16.8457	30.3139	8.67128	32.4631
1966	8.66839	39.8669	12.4714	31.8577
1967	57.8141	31.578	4.91288	12.6197
1968	40.2661	19.5052	8.39255	12.1062
1969	11.0825	26.307	12.5885	10.362
1970	15.6821	27.0794	15	12.9594
1971	22.7046	29.0857	11.5203	12.0716
1972	10.0596	32.6476	9.005	12.4979
1973	19.9949	21.0591	9.93943	11.4064
1974	23.9968	19.0439	9.15522	19.09
1975	9.68826	19.1294	10.2309	12.0889
1976	9.48419	19.4442	7.58588	12.8987
1977	17.0294	22.838	7.0251	29.6248
1978	20.9331	21.4383	8.12318	30.9926
1979	28.2837	24.2609	7.95529	13.1496
1980	21.7089	37.3414	7.22296	11.8553
1981	19.9247	30.0877	6.7152	13.2591
1982	18.425	42.9255	8.91957	15.68
1983	8.14162	40.2957	7.20174	38.1323
1984	12.6386	32.5936	5.92803	11.898
1985	20.7294	40.9438	6.17534	11.714
1986	13.9168	47.2248	5.69191	16.495
1987	11.845	46.3515	17.9293	22.8094
1988	10.0513	39.3316	11.109	14.4505
1989	19.6381	37.0644	16.3295	14.9786
1990	12.109	37.5118	24.4163	19.5853
1991	9.2009	45.8539	13.4158	11.5558
1992	38.6984	36.7092	19.5127	14.6074
1993	10.8517	23.5837	44.0363	17.1188
1994	13.0718	26.3509	11.0438	12.4298
1995	13.0774	44.0433	9.59679	25.3875
1996	9.79543	47.9902	16.2887	23.1673
1997	9.89297	26.6673	12.6341	11.942
1998	10.2474	31.7462	8.14105	53.0336
[truncated: 12,157 more rows]

## Sheet: VIMENTIN-SD
Cell ID	sgCtrl		sgT-REX17			General Statistics	Boxplot
	Day0	Day5	Day0	Day5			sgCtrl		sgT-REX17			in BOLD the statistics displayed in the boxplot
1	1.63482	2.01768	7.59892	0.975061			Day0	Day5	Day0	Day5
2	3.26197	5.31931	9.17897	0.749123		n cells	3058	11425	2329	14155
3	2.92703	2.12109	11.3597	0.643897		10% Percentile	0.7161	1.418	0.7975	0.8192
4	1.38299	3.07507	4.03281	0.748701		25% Percentile	1.1	2.768	1.241	1.089
5	6.07031	10.6593	5.51604	1.84078		Median	2.068	5.701	2.323	2.108
6	1.25722	2.813	71.9766	2.13972		75% Percentile	4.222	10.98	5.383	4.897
7	4.79259	15.256	1.41786	1.4662		90% Percentile	8.781	19.45	10.35	9.612
8	9.91457	11.612	6.26037	2.33131		Range	77.08	85.19	71.53	80.59
9	3.48563	3.40035	13.5212	1.57525		Mean	3.929	8.696	4.584	4.131
10	1.77188	3.34642	5.77126	1.31976		Std. Deviation	6.041	9.349	6.539	5.505
11	2.17032	24.274	8.50583	0.989256
12	1.34107	3.52267	2.33813	1.46188
13	2.06233	2.8363	1.55575	1.44011
14	1.60553	28.6294	1.00233	2.95847
15	0.703699	38.4035	0.744898	2.56803
16	3.39579	42.7838	5.0277	2.82021
17	8.95914	33.3386	54.2555	2.58117
18	1.16992	14.3008	1.79038	0.915311
19	1.2558	3.55602	1.37511	2.13534
20	8.88912	6.76659	1.14362	0.737495
21	3.94636	4.83154	1.04984	1.41053
22	3.49322	32.0717	9.52817	2.0465
23	0.896108	7.10289	2.19296	0.765663
24	5.98053	1.88976	2.35345	1.31663
25	10.3424	1.59771	3.52693	1.57347
26	16.4935	11.0131	1.26751	0.757852
27	4.93156	3.73513	0.948944	4.20234
28	4.80829	12.3352	0.60027	3.00917
29	36.0393	14.0549	1.58832	3.48348
30	12.1062	14.1127	2.54569	1.54787
31	8.95345	4.63951	3.94795	4.85225
32	5.46691	28.0389	3.12733	0.975548
33	2.42369	9.61765	1.22845	6.54641
34	1.95581	2.81837	16.7467	1.49546
35	1.77617	3.88345	18.6794	6.4696
36	0.93666	0.941165	2.09259	6.88652
37	4.8393	1.06072	11.9412	7.95623
38	5.01836	1.37895	1.95126	4.19307
39	5.09839	1.12324	3.49272	1.66951
40	6.88086	2.67547	8.93054	3.4066
41	2.9519	6.14858	0.974929	10.023
42	0.525973	3.51407	1.31876	3.24239
43	1.63676	3.37473	1.34499	8.91481
44	4.03131	2.26812	1.59364	5.57057
45	1.01027	2.78746	5.01813	6.99841
46	1.36942	5.00648	4.429	1.4279
47	3.10089	4.36411	3.61198	0.829504
48	5.37846	5.6439	3.032	1.30907
49	4.94933	3.08759	5.36751	0.888568
50	3.82563	4.06751	22.262	8.5071
51	3.51404	5.77034	2.39863	6.80884
52	13.1623	50.5628	55.2745	3.96382
53	5.08864	18.0275	31.5829	1.95086
54	2.17803	14.1776	57.1616	2.04297
55	2.08594	17.3459	48.3932	3.42089
56	0.706914	8.79269	34.633	3.34396
57	0.732956	11.9386	2.76686	1.17933
58	0.795052	6.59391	2.156	1.82461
59	65.9252	23.3843	2.63853	1.8203
60	15.3447	18.8691	11.197	1.78712
61	1.83594	3.18397	17.9628	0.739197
62	2.70089	3.28358	36.5634	1.76911
63	30.1449	8.09446	9.06741	2.88088
64	26.435	26.9339	21.5131	6.30534
65	2.31841	2.19159	5.99445	2.59079
66	2.37058	7.95145	1.17843	1.15625
67	1.26796	2.9028	1.33668	0.817753
68	40.6252	0.738969	1.10415	1.24149
69	8.13633	12.056	4.37487	2.58226
70	19.0823	8.87824	0.633365	1.05914
71	12.6548	3.94601	0.530665	1.70338
72	2.39148	15.7815	1.04189	0.848382
73	5.56345	8.80339	15.5847	20.1902
74	28.7841	6.72131	14.5112	1.3469
75	14.9575	5.73937	3.71944	4.88697
76	14.6862	3.67006	8.12255	1.03781
77	3.84204	5.90414	11.4905	1.49968
78	0.642908	6.03903	17.5012	2.34888
79	15.0301	7.91631	6.39048	4.63503
80	2.1052	7.11766	3.93397	1.58907
81	1.19453	4.79606	0.814013	9.36104
82	0.888404	6.20634	1.14954	17.4665
83	8.01867	2.94949	1.129	2.01587
84	3.65374	3.24725	11.1949	0.989953
85	3.94409	2.18883	0.879006	1.64156
86	0.938045	6.47293	0.566561	1.45327
87	1.08426	16.9968	0.803599	0.904837
88	2.08267	19.9832	5.01781	1.76243
89	3.15861	5.69629	22.3954	0.936778
90	2.47756	0.838014	13.3376	1.32543
91	3.08578	5.10563	6.30329	0.662802
92	0.7591	13.6987	7.81829	5.10834
93	1.79528	2.98645	5.89137	1.02936
94	0.516601	8.83925	12.9127	2.24137
95	2.95712	11.4666	2.38677	1.2247
96	6.48006	12.9565	1.88944	0.722638
97	1.65371	1.3241	1.93277	0.856741
98	6.97837	6.70557	2.66957	0.750921
99	7.88352	3.13282	5.18006	0.830333
100	1.41668	11.016	1.84513	1.31141
101	4.16051	12.9763	2.53133	0.753195
102	2.68732	16.0245	1.53354	0.827884
103	2.68868	1.9423	3.95706	0.830742
104	1.81662	21.7171	3.52253	0.912867
105	1.41503	1.3328	1.49884	0.825021
106	6.42464	7.33711	2.30603	0.828969
107	3.12272	1.19352	2.58514	1.3919
108	12.0519	3.75705	1.99385	1.52195
109	35.119	6.2262	3.02644	1.72245
110	12.436	1.61743	0.984085	1.08473
111	6.94585	1.20406	1.57454	5.07468
112	36.2174	2.88203	1.64034	1.49192
113	1.28156	6.56751	3.89515	2.35294
114	0.58806	1.15604	1.66383	0.740521
115	0.688897	1.04652	5.37317	0.888689
116	1.66854	1.15431	3.32328	0.812443
117	0.703109	1.41321	6.30529	1.72966
118	9.15809	2.00001	9.9387	0.909023
119	2.44815	3.17757	5.50314	0.864191
120	0.967168	9.20055	1.69305	2.36699
121	1.25241	4.01106	2.20253	2.02521
122	1.0304	3.12924	2.36202	1.49234
123	0.994594	1.37139	12.5397	3.76352
124	2.08621	2.03653	3.14649	0.990827
125	5.43003	1.08921	1.06387	0.722414
126	1.31409	3.11846	1.52536	1.46062
127	1.48571	0.944023	1.45823	0.822066
128	0.547146	5.78393	10.1224	18.2352
129	2.61709	4.11252	3.82673	1.79219
130	1.32596	7.83316	2.13019	1.84235
131	0.933585	9.08846	9.78531	3.29604
132	0.662229	3.58751	1.26056	2.62182
133	2.47439	2.87234	2.47195	6.11407
134	1.03013	6.77274	13.8916	0.667446
135	2.03766	4.74883	3.51483	0.903602
136	1.84386	12.27	1.87043	0.63729
137	3.97031	37.1898	1.20026	10.446
138	3.3575	30.492	4.22965	2.72789
139	1.94018	5.52198	7.02436	1.12481
140	3.68376	5.70135	0.485478	0.675687
141	0.897245	8.305	1.9672	7.22112
142	1.82894	4.38485	5.83094	0.679471
143	1.41289	25.4096	3.20005	1.12938
144	5.31722	2.60012	1.91523	1.16707
145	7.07969	14.9896	3.81739	1.58681
146	1.02202	5.76249	1.91719	2.79723
147	2.3733	15.5418	3.08561	1.15822
148	0.766741	37.2894	0.778603	7.32654
149	2.87877	7.16532	2.06164	2.63374
150	2.03812	14.663	2.09385	6.55679
151	4.90344	0.943678	1.89783	1.21927
152	3.1929	4.88719	2.86575	1.22466
153	3.91321	2.42248	0.591561	1.66197
154	0.633251	7.07565	1.96095	6.16445
155	0.920891	6.91162	0.734606	4.49228
156	7.17297	8.70597	1.29583	3.04067
157	1.92472	6.00598	0.877121	0.671018
158	3.06814	11.5575	1.99003	7.33974
159	2.0686	3.22759	1.67036	7.24615
160	2.27373	10.0725	5.83166	8.74509
161	2.25503	7.43852	3.64035	7.15119
162	1.79183	12.2897	3.63291	3.4113
163	1.19069	24.8652	0.626955	3.50239
164	1.4733	2.6778	1.56582	1.50321
165	1.1496	7.79583	0.490535	7.76358
166	2.09259	8.44703	0.778601	4.1786
167	3.54978	63.3122	0.602246	11.6444
168	6.08793	8.59953	1.08012	1.57256
169	0.575761	38.4526	1.32517	0.978406
170	0.729786	60.5997	0.576282	1.3619
171	2.16464	5.41089	1.08559	9.86285
172	1.8127	6.21033	2.31304	8.87448
173	1.52561	16.5502	0.834122	3.70513
174	1.88593	21.1492	1.08981	8.85792
175	1.68197	14.6549	0.908987	0.814937
176	2.1085	9.32662	0.610846	6.62831
177	2.89911	2.72916	0.945769	1.90051
178	1.18597	5.01432	1.11407	2.79568
179	0.504325	1.5702	1.47939	6.56359
180	0.902364	2.42942	0.747648	0.825633
181	2.44819	4.53358	1.55752	1.03935
182	0.670846	11.4451	2.50908	1.96288
183	2.88296	6.94843	4.87924	14.1235
184	1.75527	29.7344	2.93543	12.5256
185	2.32874	26.4193	0.920712	1.04248
186	18.7219	6.39398	0.888713	0.800468
187	0.99884	16.4555	0.836137	0.810403
188	1.3723	5.41145	1.39639	3.1557
189	1.76298	8.42803	5.59596	2.88563
190	1.8538	2.7227	1.20931	10.2238
191	5.37767	11.8886	1.62017	3.69046
192	2.09943	26.9983	2.14823	4.93606
193	1.84226	15.1566	7.00003	0.978502
194	5.16359	20.7263	4.28412	4.99945
195	0.941253	8.80868	1.55959	3.17209
196	4.73215	4.86093	1.45837	1.27828
197	6.49377	14.9862	1.16705	3.87533
198	8.46371	3.15211	1.50914	11.5118
199	3.08466	2.42185	2.78541	8.7499
200	1.6925	0.883723	9.42709	2.29625
201	1.59934	0.820221	0.761951	0.74226
202	7.79304	18.6422	0.570565	0.764008
203	2.54341	2.64069	0.583038	0.643234
204	0.86137	26.2071	14.9895	0.943684
205	0.73753	7.99129	4.27231	1.70985
206	0.900604	4.97315	0.725576	1.10987
207	3.53526	1.12487	0.914711	4.03134
208	1.12446	5.1762	5.81993	0.981983
209	2.22307	6.98252	2.45635	9.51109
210	4.51942	6.44907	1.45087	1.40506
211	3.63397	2.12525	1.24027	6.06347
212	4.54448	2.57555	1.25034	15.2061
213	0.806191	1.3494	1.42864	0.812941
214	0.564036	2.09318	4.45288	1.05643
215	1.15295	13.0647	2.64115	1.206
216	0.735519	24.5971	0.66274	1.21183
217	0.687806	2.84565	1.81028	0.996764
218	0.825066	7.68245	1.22862	1.88938
219	1.57461	3.90993	3.22475	1.22026
220	2.47089	14.8491	4.9526	7.98922
221	11.596	2.66914	3.42059	1.33624
222	4.32191	10.1938	7.72839	0.76734
223	1.54826	1.57842	2.60349	0.935801
224	2.72254	3.99793	3.73515	0.847259
225	1.73278	5.16659	6.01359	0.925928
226	1.24343	1.1846	0.769424	1.22422
227	0.781933	0.845124	1.52663	1.42903
228	0.651365	5.5751	1.67204	6.20226
229	1.24064	8.71343	1.7905	2.73174
230	0.645162	12.4971	5.52938	9.21288
231	1.12144	6.93863	5.74616	6.6466
232	1.57477	5.80742	0.771786	1.47818
233	3.38994	5.11927	5.40483	7.35388
234	1.40749	35.2113	0.753771	2.14517
235	7.76239	26.5321	0.59264	0.944848
236	2.23629	6.9474	2.78732	0.95897
237	17.3892	3.81374	3.38709	4.11671
238	11.8345	35.7538	1.20794	2.1582
239	1.81959	13.1485	0.896744	0.960689
240	1.77349	4.90713	1.28773	3.38482
241	3.38445	19.9856	1.30895	3.4532
242	17.681	15.8726	2.22939	3.28308
243	2.12338	3.12802	5.50945	0.758899
244	1.63407	4.87113	1.26941	4.38436
245	2.55204	4.82451	1.46522	0.78103
246	14.8777	3.03057	2.637	3.04001
247	2.46294	1.78568	5.58493	3.76365
248	8.06683	9.33858	4.29544	7.91702
249	1.47894	9.22624	2.22225	8.41871
250	4.11684	4.14084	1.65216	16.9535
251	3.191	6.54345	3.9198	0.884297
252	11.238	29.3563	0.552576	0.879865
253	2.14684	5.63935	5.61613	3.26397
254	1.42519	3.7373	3.08935	9.42326
255	1.53089	2.5586	2.73161	7.31121
256	5.14493	3.09642	0.685945	13.6592
257	18.9625	1.51854	1.21589	6.54944
258	1.94658	4.95203	7.89269	8.79768
259	0.69263	6.53836	5.53298	3.8326
260	2.79845	1.89283	0.873511	0.713133
261	3.14161	1.97389	2.89146	2.20197
262	5.03464	36.4412	2.3211	0.871621
263	0.932385	11.125	2.17548	5.52649
264	9.55385	7.25078	1.51678	2.07752
265	1.82748	10.5585	1.35702	2.87565
266	1.7475	5.24165	2.99903	1.21798
267	9.89847	6.86151	2.72463	7.12544
268	0.707112	8.56964	0.71564	11.907
269	0.500422	6.24736	1.11416	3.0934
270	0.762637	4.28869	1.40091	17.3665
271	0.616608	15.7393	0.731916	7.06797
272	10.9039	3.78198	0.569058	4.34877
273	0.855823	4.72502	1.23431	0.760177
274	2.45182	14.7322	2.38001	3.63445
275	2.93369	3.03191	2.37064	0.921075
276	11.3983	2.99554	1.1599	6.57879
277	6.93556	22.1433	0.964523	9.28287
278	4.39753	24.5315	1.87897	8.30998
279	0.504854	4.24888	0.925897	3.08551
280	0.586263	2.04174	1.47996	1.85722
281	0.865085	2.03841	0.825837	3.6497
282	0.517222	1.10931	0.906078	2.313
283	1.90342	3.25521	0.551353	1.58333
284	0.802284	6.44206	1.97821	14.3162
285	0.5007	25.5365	2.33631	6.67008
286	1.07938	10.3463	2.8117	1.40621
287	0.696472	3.83829	1.28375	11.0414
288	1.13161	2.42633	3.64967	4.48472
289	1.78122	21.7211	11.5351	5.48539
290	3.79705	10.2686	4.28728	13.2801
291	0.951567	21.3761	4.29928	2.20665
292	1.33764	18.3954	2.96772	0.708705
293	4.43998	3.9777	8.98779	23.8
294	0.844525	4.30844	5.29367	0.913756
295	2.42579	3.35704	1.97085	5.76059
296	2.73696	4.5608	1.81967	1.48877
297	0.908744	6.14199	0.819492	3.78132
298	8.70937	8.04763	0.830435	0.976974
299	8.47384	25.9294	0.845341	3.11899
300	2.48728	5.27225	0.594075	6.93299
301	5.26899	9.93046	1.11125	1.84464
302	1.8578	3.23817	0.946935	2.62734
303	4.16889	16.6463	0.513693	2.5202
304	0.532085	4.88809	1.13558	1.29479
305	1.31647	9.0134	0.503074	2.06098
306	0.503336	8.77308	1.23002	0.858152
307	5.7648	3.44042	1.84402	8.98509
308	0.412325	5.02692	1.30121	1.28736
309	0.704225	1.12509	0.801464	7.24716
310	0.732947	2.93933	0.605722	1.41881
311	2.13411	1.76024	1.84526	1.20603
312	0.779499	1.29664	1.96935	2.61087
313	0.535935	4.27001	2.1652	2.12461
314	0.535308	1.84841	1.24269	2.66467
315	2.05682	5.34572	8.63041	29.3694
316	2.9552	4.38275	5.21501	14.4178
317	13.4114	2.15649	1.99322	1.18322
318	3.80511	6.69019	3.84367	1.53332
319	9.21706	6.13905	1.36361	0.668974
320	0.842877	16.8275	3.43134	2.06224
321	0.525667	20.468	3.0409	5.26949
322	0.587705	6.25353	1.28401	0.71863
323	0.591489	15.3749	1.24176	5.91981
324	2.10147	5.37618	0.649851	2.46638
325	4.31949	7.63357	2.45579	2.16797
326	2.40874	2.85455	2.68932	1.9611
327	2.98771	2.63093	1.52634	20.4847
328	1.91525	4.40069	1.75024	11.7208
329	0.744221	7.59414	0.723402	0.781179
330	4.36299	11.789	0.883898	1.11346
331	0.739313	40.9138	0.965854	3.49015
332	2.6959	55.6514	3.07482	6.97228
333	3.96815	3.16263	3.73641	3.60802
334	0.907393	6.20707	2.81253	2.12348
335	1.32769	0.93682	17.5019	3.7483
336	2.04424	4.21721	3.09335	0.872155
337	1.25746	0.911069	4.47952	3.09144
338	0.539887	1.34233	2.71166	1.58894
339	7.285	1.41335	6.91074	3.54504
340	1.92556	2.5957	12.0266	0.975562
341	1.19556	3.62608	2.14917	2.89947
342	2.05581	9.86571	1.11886	2.38201
343	1.52334	19.117	3.98286	2.63751
344	1.21883	1.56264	4.36403	6.58802
345	1.89219	1.65204	1.56869	1.83045
346	0.636789	2.03122	1.56895	8.30123
347	0.979829	4.34356	1.13414	2.66444
348	1.77593	4.62754	1.3809	2.15952
349	0.658567	10.697	3.81023	2.8152
350	0.71608	1.32948	2.52847	8.43768
351	2.84668	1.8538	5.05388	2.57141
352	0.964663	2.00213	7.53971	1.09405
353	0.650489	4.54298	2.6663	1.50911
354	12.9465	8.02033	22.1809	3.33033
355	1.83123	12.0447	2.40801	2.28825
356	3.46117	7.82808	0.502298	2.36912
357	0.894395	7.60363	1.08254	0.795914
358	7.69741	0.91712	0.799945	1.71441
359	10.0553	1.06739	2.3073	3.20485
360	0.860172	7.79635	4.89928	3.0489
361	1.02837	1.84951	14.8581	5.81512
362	1.25165	9.35235	2.95577	2.09388
363	2.41618	33.4969	2.63032	9.27208
364	24.5418	34.73	14.1911	6.3608
365	15.3664	0.857382	2.62096	3.21722
366	16.6042	1.87473	4.15784	4.45862
367	1.11129	3.5	6.89645	0.68147
368	1.97346	1.89642	14.4561	4.59216
369	0.619923	2.75802	2.31378	5.48506
370	2.79295	2.4044	17.4289	13.4034
371	1.32506	6.98	3.68299	13.9304
372	4.24994	4.21832	1.79214	2.0345
373	2.91096	4.05377	10.816	10.9936
374	6.85282	5.50073	0.966199	1.32669
375	2.30882	2.93024	1.02942	1.71324
376	1.68047	1.96207	1.97951	2.5417
377	0.837549	3.3361	1.34158	0.749194
378	1.32246	3.12991	1.21512	1.11163
379	0.789984	3.98896	0.678165	3.10795
380	7.75192	5.3062	1.28569	4.32819
381	3.07545	12.5472	6.50404	2.32756
382	1.45612	2.06325	11.5011	2.33219
383	2.99438	5.23904	20.6034	1.56656
384	0.896818	0.997505	1.33223	4.13024
385	0.925978	3.92895	1.22306	1.62422
386	0.499296	16.1934	0.946335	1.22739
387	0.932722	6.84258	1.55751	1.78914
388	1.02162	3.5977	1.45675	3.63246
389	1.05997	13.5464	1.75603	0.652904
390	0.890308	5.52758	1.90359	2.15502
391	2.16934	17.5389	7.13109	0.977919
392	1.08625	6.20037	4.98027	1.86696
393	0.940792	3.78615	3.33946	0.75394
394	1.04977	11.7857	8.31598	6.56512
395	3.27417	34.5389	26.9106	3.37298
396	0.927952	10.9963	11.0776	2.2847
397	3.01814	37.7611	3.41797	1.34867
398	2.3952	12.6566	5.56519	4.71128
399	1.27144	9.05667	7.55553	5.95187
400	0.731707	3.27369	11.2187	7.86464
401	1.28067	5.10211	7.08422	2.23161
402	4.23402	6.17493	9.5412	2.60953
403	4.76563	5.74413	2.00839	17.9975
404	0.63339	3.82018	2.27368	2.46949
405	0.611448	12.4254	4.11571	0.61134
406	2.61555	4.27909	3.07953	2.6388
407	6.04734	11.3044	3.98972	1.29159
408	3.75477	26.5071	2.7623	5.15995
409	0.945144	2.65154	0.959728	3.8659
410	2.20331	2.8051	2.29095	1.32234
411	1.18994	4.78746	2.02191	0.757972
412	0.945843	12.6835	0.540778	2.18785
413	5.91561	1.21563	5.68387	8.07179
414	1.82578	12.0103	1.34373	7.68101
415	2.80777	0.789274	1.75014	4.91998
416	2.43767	1.63568	1.58415	1.34799
417	7.70609	10.1046	1.92426	0.807808
418	4.90413	8.28083	2.20457	1.959
419	1.94366	5.40708	2.65	7.00593
420	1.93174	5.35808	0.629721	1.07154
421	0.45482	5.17694	2.26504	1.35756
422	0.692413	29.4946	1.64535	13.2952
423	1.23618	67.5746	1.30398	2.11222
424	1.91431	8.36434	6.26151	1.32867
425	4.64905	22.2992	1.26553	0.72518
426	1.1844	12.2144	5.07783	2.82498
427	3.42658	13.4849	3.58692	1.6647
428	19.5866	6.82837	2.15899	1.74756
429	0.937355	2.33712	1.75103	3.3067
430	1.47475	2.85494	1.88971	4.18028
431	1.2471	4.19951	2.15632	2.13345
432	1.05769	1.95533	3.80682	1.28465
433	2.07704	5.08168	5.99261	7.06428
434	1.92326	5.2264	2.52086	5.04358
435	0.961002	11.8971	5.92067	6.23833
436	0.681844	6.52328	4.93892	0.707499
437	1.22363	4.0748	3.55023	0.8656
438	2.13853	1.00827	9.44468	1.21179
439	0.551142	4.77756	11.6077	3.53324
440	0.503653	5.97527	0.852054	1.76836
441	0.517927	5.61641	0.831194	1.79578
442	0.716344	3.81343	0.738744	0.802044
443	0.8504	8.20462	0.87005	2.23778
444	0.874243	20.1504	1.10934	2.2668
445	2.35958	23.3602	4.16028	4.40677
446	0.51724	5.84328	3.51314	6.14279
447	3.02883	3.54128	0.962928	0.654749
448	5.56756	1.23418	1.79593	1.07078
449	1.61282	19.3831	6.1385	2.0537
450	0.437141	9.34021	1.35013	9.08617
451	1.38069	4.39387	0.796196	6.91644
452	2.0697	11.7027	0.793647	8.34628
453	2.46142	4.4762	0.597895	1.1726
454	0.70742	8.07677	0.659301	1.91398
455	0.756129	1.84938	12.0589	24.1242
456	8.29571	2.39009	6.44242	16.3223
457	7.14426	2.34469	1.39579	21.6348
458	1.95285	7.2215	4.16857	1.0361
459	1.62283	5.75855	1.32619	4.54695
460	3.63388	7.40047	0.821293	2.53344
461	0.998518	1.50118	1.2534	1.50391
462	0.833971	8.86526	1.91885	0.830586
463	2.58473	5.02454	0.883469	19.7154
464	0.743005	4.36026	0.696411	2.90094
465	8.96321	2.64254	6.75364	2.68359
466	2.42895	6.50732	11.501	1.05372
467	0.70481	3.94043	21.9842	13.5824
468	2.20234	2.51027	4.31724	6.53435
469	7.41157	2.54971	0.887996	1.27495
470	6.86031	1.26664	0.719308	2.60365
471	3.27198	12.7768	0.588006	6.86488
472	2.20248	9.96559	1.50725	2.72828
473	1.64461	6.38057	1.19155	1.25009
474	1.53501	19.7667	1.21073	0.96848
475	2.21447	7.44403	2.31307	3.33385
476	3.31842	18.0589	0.720006	12.1092
477	2.04238	1.20474	2.51908	0.858632
478	0.385784	8.99628	0.547054	0.84405
479	1.44859	9.12003	1.24176	5.26922
480	1.09852	27.9003	0.837127	1.13649
481	1.04731	29.9173	4.92535	1.22393
482	3.55132	15.0922	7.70423	3.38198
483	5.35751	12.7574	11.2855	0.885615
484	3.67739	31.9302	20.1292	7.39881
485	1.93085	8.20047	2.32127	0.788343
486	1.1483	0.82815	0.925087	3.71882
487	3.31196	1.96035	1.96178	1.06517
488	2.60422	5.53618	0.678355	1.37551
489	0.684685	12.5038	7.93478	1.57486
490	3.74574	2.59845	5.1916	0.715689
491	2.0935	2.06488	8.39723	1.28001
492	3.1412	9.63608	1.57125	1.12183
493	5.09122	23.1423	2.50906	20.7336
494	1.98629	34.1498	0.770898	0.932682
495	1.28931	19.7373	1.69696	1.97197
496	1.91967	27.9503	1.94803	22.7975
497	7.45051	1.73361	9.74877	8.68079
498	5.01155	5.47813	1.23127	1.05714
499	4.07282	8.1424	1.15731	1.2015
500	6.6235	10.7196	1.44565	1.23931
501	3.11246	28.3856	11.5472	1.21849
502	2.57151	14.3136	1.94757	2.60461
503	1.10575	12.7895	2.67598	4.6093
504	1.69732	31.7815	3.54546	12.1777
505	9.2031	5.51485	1.11036	2.38091
506	1.52313	9.81506	2.99645	1.24405
507	0.660023	14.8893	4.34387	1.13014
508	0.89622	37.1939	3.81947	0.818643
509	1.35828	53.1087	1.26292	0.969637
510	1.90042	47.4808	3.9907	2.28499
511	11.3329	53.082	3.95604	7.0952
512	15.7177	1.63351	5.76128	4.63534
513	4.0875	6.92826	8.1064	0.665286
514	1.61282	2.77212	3.54581	1.018
515	5.66229	2.09243	6.06867	1.11936
516	2.70717	9.30407	3.28911	14.8147
517	0.644144	0.879159	5.85109	0.86168
518	2.14308	2.41602	5.744	9.27187
519	1.94991	0.963497	5.72353	2.53623
520	1.18699	6.1803	6.47671	5.75934
521	1.5704	9.83627	2.48768	4.94335
522	1.7651	8.94099	2.97673	1.84329
523	1.31312	8.27852	8.68257	3.31367
524	0.90713	2.83953	11.7019	13.8512
525	1.66456	5.11685	5.14948	8.4288
526	5.41418	9.49974	4.78856	12.7768
527	1.08376	7.45843	1.73871	15.9058
528	1.1163	7.59873	0.834812	27.885
529	5.30349	1.23886	19.1344	1.2703
530	2.64726	17.0489	12.8422	1.56683
531	1.36831	7.08434	5.85287	4.95702
532	1.92166	6.19893	5.4653	2.2238
533	0.661828	2.42858	4.50327	2.3948
534	1.78375	7.18589	3.55973	3.14019
535	1.77292	71.5033	8.05143	3.11627
536	0.976329	7.59836	21.1226	6.94736
537	1.13859	9.99254	23.1791	1.13669
538	1.74622	4.16803	5.82205	1.06211
539	1.0435	7.92045	20.7583	6.64612
540	2.03971	6.66736	1.77247	13.0104
541	1.12963	9.82811	11.8598	0.945386
542	1.07692	19.0016	6.25819	0.869238
543	0.917689	8.79474	4.08213	1.20576
544	6.68439	1.69065	6.49312	2.36818
545	2.57224	2.70243	2.73508	5.43292
546	0.8766	5.18487	4.13792	22.2351
547	1.93296	1.29422	2.37202	10.7087
548	0.621841	4.20822	1.35745	11.7135
549	0.854481	8.50796	7.20208	5.1219
550	1.48348	3.15522	6.10177	2.02932
551	1.86082	2.67067	4.88503	1.46905
552	4.55204	3.1715	2.23546	0.705904
553	5.21071	7.05901	3.2207	3.38044
554	1.00609	18.4142	7.01088	7.60529
555	4.85522	4.53153	6.41226	3.55575
556	0.605277	2.56745	5.49257	1.47238
557	0.776064	3.93394	9.58285	17.6741
558	1.46313	8.51787	11.6164	1.88756
559	1.67501	5.9889	7.47428	0.92557
560	2.56911	6.60181	10.3548	1.13332
561	1.11242	5.61169	11.9541	0.75305
562	0.994534	10.2733	18.2511	1.5751
563	4.31236	3.33623	0.940932	9.14317
564	1.81884	9.86608	1.82545	6.07479
565	3.07277	7.06255	9.22759	0.776383
566	0.682479	9.89904	1.60527	1.29876
567	1.03268	11.8864	3.17225	0.786291
568	2.05593	6.7047	1.13378	3.093
569	1.74496	35.4513	6.25302	0.780421
570	1.30992	46.9878	1.84275	1.19907
571	2.12379	43.3635	5.37423	2.76925
572	1.07302	5.73254	5.84431	9.81261
573	1.33098	6.28916	2.15108	0.76517
574	0.920117	14.6367	3.62283	0.737947
575	4.40729	4.60427	3.26118	7.5614
576	0.569318	48.0897	4.75608	5.45128
577	2.72805	28.4065	1.61321	4.78281
578	2.16283	29.8079	12.9614	3.70009
579	0.699177	16.6821	6.75894	4.90884
580	0.483542	7.29404	3.53054	1.10238
581	0.587537	79.8263	5.31703	2.43156
582	2.22749	12.3563	11.6857	3.1253
583	2.55176	18.7203	12.8926	1.67533
584	3.36185	49.6877	1.82321	1.12892
585	0.782675	17.3433	7.55058	0.82379
586	5.37842	10.8172	2.14186	5.39127
587	5.21511	20.2168	11.9094	4.64558
588	2.93767	22.6889	17.7832	6.06574
589	1.31957	2.80804	2.13764	2.42091
590	3.69865	38.693	1.42413	2.23153
591	3.00268	6.68662	0.78225	3.72687
592	2.36597	1.01891	1.44033	1.10877
593	5.93125	9.07731	1.22297	4.57365
594	13.1001	8.2491	3.15044	5.32773
595	6.88232	2.01417	3.42032	0.821258
596	1.21196	2.68135	0.915838	0.738439
597	0.966265	1.36041	0.81369	0.796493
598	1.93933	5.20148	2.01516	0.997021
599	1.36196	19.1569	0.649553	3.07441
600	7.45096	14.724	0.575726	8.64093
601	0.631129	9.96666	0.60517	13.2488
602	0.692593	6.31036	0.905247	3.94486
603	2.20773	22.8852	2.16425	3.67322
604	1.49956	13.6567	0.729066	3.38039
605	3.36001	1.95595	6.03646	6.17586
606	1.07897	4.4888	6.17322	2.17735
607	2.48734	10.1435	0.703206	1.40045
608	2.68657	2.13919	2.09284	6.52847
609	2.12399	1.29052	1.41234	9.12544
610	0.746661	1.25082	0.500586	3.51651
611	1.38783	7.09311	3.63607	1.19363
612	1.14341	6.47177	3.85333	1.27371
613	0.715802	4.25767	4.38554	1.40704
614	0.667855	6.78372	6.42977	6.80155
615	1.15575	9.10942	10.5743	3.63984
616	2.25438	6.1795	3.33382	25.1095
617	1.17765	8.30653	1.95015	17.4756
618	1.96654	7.97527	5.78928	15.3325
619	0.877553	6.78252	1.40484	8.09029
620	0.928383	5.88851	5.70267	7.1099
621	1.07045	12.1512	1.92752	1.27289
622	1.34038	4.12024	4.41419	25.7727
623	2.22857	4.38808	3.63424	9.37091
624	1.83866	10.6801	27.4478	11.4391
625	0.96305	25.1936	1.38531	27.6893
626	1.21266	19.8293	4.1578	35.0624
627	0.984161	20.4139	4.65673	4.43808
628	0.710592	34.0764	5.09619	13.5833
629	0.859216	4.38002	3.26086	9.99168
630	0.961143	36.6783	3.21018	2.06696
631	0.576324	25.1631	1.72558	3.96136
632	5.24382	35.0772	0.914292	2.5564
633	0.60505	8.04189	1.17726	2.62849
634	0.735037	28.7984	10.0785	18.4589
635	1.44194	6.49085	4.81312	1.14453
636	3.46029	9.94178	15.7689	1.06349
637	2.31844	29.5083	0.633011	0.781637
638	1.66135	20.4088	3.87218	3.09968
639	0.855671	18.3928	5.39316	4.07895
640	1.18116	21.9159	1.68169	4.98977
641	1.39244	13.3431	7.95268	1.29699
642	0.668656	2.73673	6.15666	5.89679
643	0.481419	1.71475	1.40958	25.4664
644	0.53122	5.76254	5.76463	1.21061
645	1.49441	4.31523	3.20821	0.913469
646	0.519856	1.50175	3.47182	4.38056
647	0.677667	2.47651	5.37158	2.80881
648	5.75287	3.29159	15.6433	1.79309
649	11.1532	2.69145	2.4298	1.25346
650	5.24156	3.80272	5.08761	1.48289
651	0.878212	4.52621	1.86972	0.875644
652	1.67542	8.9857	5.28765	14.9566
653	0.892988	13.8587	5.71826	31.449
654	2.98733	9.72083	25.9287	4.97847
655	1.99972	9.98716	0.559817	4.08248
656	2.12516	5.06258	0.610556	0.780563
657	5.06161	21.6456	0.675074	1.12274
658	0.753487	10.6909	2.78395	2.31833
659	4.613	7.5172	3.75273	2.23893
660	1.99463	2.88166	3.75979	0.963697
661	6.66507	2.6455	19.4812	1.87856
662	1.68556	4.97222	12.1093	7.43856
663	9.38639	4.12391	3.48755	0.948548
664	10.6582	20.1656	2.10595	13.2626
665	15.4283	6.02153	3.56588	3.5177
666	16.2172	3.80305	35.0681	0.654498
667	4.74511	3.13455	7.14309	1.17509
668	11.1608	5.27861	10.1065	16.8656
669	3.79019	12.6958	9.11749	12.5833
670	1.38793	5.77204	7.96125	1.71167
671	1.60871	1.49774	4.8722	1.83283
672	1.38487	5.07737	2.79549	3.67045
673	1.50216	3.3405	3.84622	2.4921
674	0.714327	11.9799	3.51345	11.484
675	1.25128	12.8621	4.15585	1.36401
676	0.81597	16.971	1.87522	0.782516
677	2.90332	21.4685	0.867046	3.41008
678	0.651272	4.08265	1.03824	6.59882
679	0.668966	3.60167	6.42006	10.4894
680	2.17298	5.82192	4.45307	7.73385
681	4.67503	7.76892	1.794	4.89424
682	2.66668	2.92472	19.7727	18.4406
683	2.43218	9.00181	36.3601	2.66504
684	1.18872	12.8028	15.0795	13.2631
685	1.92533	16.0279	61.0662	2.25122
686	1.77593	39.6721	1.52516	3.68357
687	4.92677	46.7378	3.11458	2.06383
688	2.124	14.3278	1.01335	0.800419
689	1.65487	3.93617	2.00663	3.00671
690	1.67771	6.49266	2.01416	10.6756
691	3.07547	12.5289	3.39688	2.21856
692	1.4866	7.90407	5.34126	5.80996
693	0.865087	15.6354	24.0194	21.3916
694	1.49913	4.21053	0.917027	12.4847
695	2.99178	10.3163	4.88601	3.43056
696	1.79329	8.21728	3.24787	9.20986
697	1.43369	8.70559	2.71867	24.8768
698	1.58999	11.5637	2.87958	7.56286
699	2.17624	9.92984	0.780958	9.68126
700	2.55746	10.7103	1.17527	3.39868
701	1.44512	5.3579	10.5549	7.81767
702	0.75438	2.77592	11.7125	5.38746
703	0.995101	4.65521	11.2907	3.71976
704	1.14839	3.57404	3.49366	1.20908
705	0.952067	30.8069	2.58299	1.24959
706	0.688592	2.00894	1.74901	11.6885
707	0.831361	4.68754	5.12197	8.76426
708	1.31167	6.0752	7.43846	4.4994
709	0.974743	8.49039	1.75987	1.62355
710	1.39285	27.6438	1.78977	1.14504
711	1.01206	31.9498	0.738895	1.17916
712	1.27206	6.61525	0.805424	1.85237
713	0.55835	11.332	0.777012	14.0292
714	2.20332	7.2325	3.12522	0.854226
715	3.71614	1.09531	14.902	5.80151
716	3.77563	4.74458	43.3784	1.41738
717	12.0284	13.0484	40.1641	5.75736
718	7.70996	3.90202	56.2877	18.1869
719	1.7286	17.5028	3.46315	3.11201
720	10.9432	11.532	1.64306	9.06472
721	4.19416	4.27687	20.9017	3.11055
722	11.0798	6.63057	6.02636	12.0391
723	1.27951	22.2183	8.61635	3.76629
724	3.41293	11.2059	42.6384	1.02343
725	2.29186	2.48341	27.8667	9.35228
726	2.61731	8.51865	2.16687	18.0196
727	1.38627	3.83485	1.10267	10.0027
728	5.15469	2.0878	1.06941	8.16967
729	2.09489	3.89617	1.82594	3.26744
730	1.88911	2.35586	1.3813	3.97064
731	1.19461	1.36757	2.2309	3.81087
732	0.726963	1.49215	0.8216	0.776676
733	0.829142	1.58069	0.560495	9.83019
734	2.72684	7.73507	1.10593	1.2054
735	2.32384	12.1519	2.41373	12.5054
736	0.762109	5.5106	1.80167	2.87849
737	4.24336	9.6923	10.3426	4.25926
738	1.67099	2.78453	13.649	1.96917
739	6.271	3.05355	36.5728	6.1522
740	1.79771	3.24951	18.9569	6.06143
741	4.48996	4.35609	20.5728	15.6874
742	9.85383	5.43096	2.31658	1.44498
743	1.92049	8.5611	1.88454	0.768132
744	3.66195	23.8796	5.0095	0.707608
745	4.43493	4.93485	3.67339	10.3016
746	8.8212	2.13283	5.63278	5.48276
747	10.147	1.64694	1.06355	3.324
748	32.0475	2.48259	0.799497	17.8016
749	2.44938	18.3937	2.38965	9.9092
750	14.8325	16.8146	11.9152	6.36419
751	11.0574	15.7399	3.65288	1.81582
752	30.157	13.2025	0.839264	2.23545
753	7.07808	5.123	1.4291	3.23248
754	3.91712	10.5677	5.23664	1.1132
755	9.97262	1.97446	1.72442	3.82295
756	15.6785	1.48291	1.564	5.38502
757	4.17091	2.03471	0.972327	2.26791
758	3.75194	5.0775	1.49404	10.8634
759	1.54261	6.76709	24.4791	0.871973
760	1.27005	4.73807	1.10847	1.18907
761	1.42293	9.8911	2.83502	3.15541
762	0.677646	26.1108	1.86677	4.66207
763	2.05513	23.0978	1.1493	6.99797
764	1.99544	20.0321	1.9696	7.69691
765	7.55971	14.4688	5.5492	1.50491
766	3.25008	2.75614	4.37999	2.1315
767	0.999122	6.4517	2.97989	1.02425
768	0.728716	15.9545	30.8369	14.6479
769	0.929437	4.4738	1.30734	3.15941
770	0.974519	6.85563	0.921137	1.27812
771	0.679994	8.62301	3.52501	1.00913
772	0.802492	48.0089	1.70606	20.5554
773	0.844481	1.25428	5.14033	17.6907
774	0.802695	12.0737	5.40199	20.0773
775	0.510629	4.11429	5.04418	2.9884
776	0.882753	4.58606	3.39514	0.912493
777	0.969977	1.06869	1.98888	2.23199
778	4.49029	1.20377	41.4747	7.5967
779	3.52944	4.80814	13.5644	9.66458
780	1.41226	31.4362	2.07585	3.93318
781	0.771997	14.4975	1.54112	5.37482
782	2.12384	2.92914	8.23109	1.12827
783	2.12165	18.3033	3.15571	3.22485
784	1.7367	12.1985	7.53237	2.94664
785	0.670196	31.6244	1.93475	3.53752
786	23.9552	32.4114	6.35882	6.41472
787	2.51969	16.8101	1.43029	2.05471
788	1.52678	8.99059	3.33313	1.2625
789	1.52185	18.4625	4.49095	5.14509
790	0.643975	22.4809	11.3333	4.02069
791	0.691392	12.3059	2.58687	13.5954
792	0.635249	7.87432	1.96623	1.51064
793	1.6751	1.39084	1.00811	6.91259
794	2.20899	3.9109	0.726473	15.4442
795	2.23812	10.5202	2.012	7.98849
796	1.21658	4.48778	3.18148	3.47692
797	1.45343	4.79758	9.51745	4.55801
798	17.4712	5.68572	22.7951	2.32204
799	6.52323	4.26558	1.69263	29.8059
800	1.18941	9.25112	1.89838	4.58034
801	1.17057	12.7785	10.7828	11.9707
802	1.94329	2.37137	9.7451	1.49747
803	9.83569	1.32165	2.34892	1.15655
804	13.7468	8.76755	5.82477	6.96207
805	1.19335	11.7566	1.25985	2.46475
806	0.570792	5.14219	5.84927	1.46144
807	1.46446	5.62467	2.25994	4.80689
808	0.493529	3.87766	6.71633	7.69248
809	0.547851	3.52831	10.4093	1.09139
810	0.931433	5.48655	5.65679	38.358
811	1.68628	10.8872	3.30953	20.7532
812	0.761	8.24646	7.62689	3.09802
813	7.2227	5.22003	1.96427	3.49496
814	1.21593	11.5227	3.13249	0.788106
815	24.6867	7.49277	10.6826	27.0979
816	16.3717	6.39215	10.4795	1.57763
817	6.20674	6.15317	16.1164	3.05852
818	2.08249	5.36187	5.1292	3.10748
819	0.574693	1.83404	3.09991	9.99872
820	0.700191	2.14814	14.7412	0.640183
821	1.30484	8.43917	9.99086	1.04472
822	3.37497	4.938	3.02046	3.58097
823	1.09896	3.76803	1.93363	32.9736
824	2.23351	1.58815	0.816073	1.43186
825	9.4081	9.82868	2.40517	2.14829
826	6.8142	0.92946	2.34586	4.02951
827	5.52264	2.24227	4.69718	2.54797
828	1.47221	6.77206	3.839	6.98026
829	1.02114	2.60539	0.870411	2.27354
830	1.96222	6.15668	1.22072	0.941847
831	1.54413	1.62412	1.44274	1.28213
832	1.29475	11.8715	2.24716	1.43674
833	4.73646	9.60185	0.695017	5.67293
834	0.998989	6.66426	0.856489	1.41578
835	1.15056	8.74279	0.968948	1.12578
836	0.692952	1.53048	0.910219	2.37626
837	2.86432	4.34884	1.44406	17.3026
838	4.93642	3.54485	0.564287	10.414
839	4.59106	8.56382	2.80078	3.50021
840	2.04413	14.7679	2.95848	2.26724
841	1.17944	8.19276	1.0438	5.77475
842	0.615891	4.84822	3.49164	8.02127
843	1.11136	43.3311	0.680614	8.20814
844	0.594506	1.17707	1.73084	3.75302
845	7.26122	1.59512	0.623142	9.60392
846	0.550154	2.34978	1.71136	4.85067
847	3.14154	6.43553	0.525681	4.16717
848	4.41071	1.559	0.585781	7.38467
849	6.10295	1.03716	1.08905	3.56308
850	1.34808	1.10748	2.42382	7.1551
851	1.72309	3.45421	0.63926	5.71233
852	2.46414	1.11245	0.579536	2.58677
853	8.30493	2.5329	0.557512	2.25323
854	2.16395	6.34803	1.06221	19.3135
855	2.69035	6.54355	1.27982	9.40871
856	2.18189	2.6785	1.01864	1.09385
857	0.696095	1.95972	1.23084	3.41009
858	0.974612	7.26443	0.759873	0.732993
859	1.07677	2.60732	5.1777	2.92322
860	1.33458	4.57878	4.83711	3.63733
861	1.63901	3.75617	10.6674	3.82785
862	1.37765	4.47495	6.57196	0.810382
863	0.772851	1.93262	1.26408	0.929109
864	2.10106	1.44903	0.773205	4.71186
865	5.39735	1.71908	1.21434	6.58388
866	1.86834	0.962247	0.648183	2.60862
867	2.2878	1.03079	0.563816	0.627101
868	1.89519	3.30188	0.526821	1.11009
869	1.49274	2.48051	0.870376	1.54049
870	1.08854	2.53196	0.565648	0.747203
871	0.581919	6.27238	0.541102	1.43696
872	5.27387	40.5433	0.974667	0.737198
873	0.97674	13.6476	0.948486	0.842721
874	1.94898	6.46269	7.03414	0.916782
875	1.13926	0.901342	2.51055	3.46443
876	3.38304	2.35662	1.34768	1.22435
877	1.55654	1.02017	1.16667	1.00511
878	2.68419	2.27441	1.79337	0.910724
879	5.63034	3.44327	0.68427	0.762018
880	1.23004	3.30454	1.08717	0.681902
881	3.52022	9.52331	1.55064	0.653836
882	0.686126	7.90563	2.46807	0.690512
883	0.560858	2.48468	0.978274	3.61643
884	3.71124	9.07666	0.729838	0.756344
885	1.41267	7.99535	1.3121	0.719548
886	1.131	15.1063	2.74491	0.697508
887	0.581049	17.4796	6.395	0.876803
888	0.51708	8.50161	2.88265	1.19723
889	3.99481	61.0487	7.87317	1.03569
890	1.9356	17.6732	2.73208	0.877411
891	2.33828	16.4557	3.13358	0.977201
892	1.8637	12.0731	8.06692	1.70739
893	2.09557	36.2958	1.35639	1.02484
894	0.867313	4.00932	7.49231	0.832657
895	0.586459	5.52058	1.07929	0.779465
896	0.734327	27.4917	1.78017	0.861235
897	1.03921	20.0678	1.03104	0.704747
898	2.15097	20.6529	3.67186	2.54137
899	0.491756	20.8137	5.81133	6.01709
900	0.92836	26.7773	15.3103	6.14294
901	1.66632	5.602	0.605522	7.09291
902	5.66136	14.1461	3.03362	2.3302
903	1.9832	6.47912	6.92001	1.00368
904	7.98331	5.79935	20.7831	0.940689
905	1.51608	64.4775	6.50373	1.80516
906	2.07661	7.63162	1.28336	0.773306
907	1.19389	12.7087	2.57126	1.38955
908	1.77374	4.25292	7.54717	0.695324
909	3.28552	17.1496	5.30486	2.25026
910	1.57587	3.99327	5.53917	1.30921
911	0.535852	1.42074	8.1915	0.837936
912	0.530721	1.46048	9.29947	1.1681
913	0.489027	0.748404	2.68113	1.27147
914	0.642739	2.72945	1.09664	1.30709
915	1.16364	1.60841	1.06739	0.8757
916	0.619966	4.45751	1.75116	0.634551
917	0.531177	7.92282	2.19948	2.07025
918	0.654058	0.898668	0.98223	1.03619
919	1.20406	1.64495	2.37653	1.00086
920	2.46177	11.2914	5.78067	0.987984
921	4.1955	32.305	7.02632	2.2021
922	3.15037	3.47124	5.3408	1.82999
923	1.77258	1.14367	2.28547	2.03272
924	5.86276	1.68427	1.75675	6.0533
925	1.3239	1.77892	10.9191	0.753607
926	1.80819	1.17584	7.92657	0.824023
927	2.04452	2.34343	19.1699	0.736837
928	3.76729	25.3814	9.75859	0.74612
929	0.531721	16.3198	1.0094	1.77433
930	4.75055	2.90738	1.14898	2.36827
931	0.669574	1.65172	3.83052	1.2721
932	1.41444	4.34141	1.4755	1.47271
933	5.85002	1.01873	3.86315	0.906755
934	0.47998	3.26815	1.3046	4.02313
935	0.707648	8.06596	4.27488	2.77291
936	0.877353	6.25684	5.46735	1.9335
937	0.477754	0.8373	5.79163	0.956367
938	0.68324	3.89235	0.740493	1.19496
939	0.795867	1.70429	1.92006	1.83874
940	0.53123	2.2122	2.69947	2.99227
941	0.8252	4.18339	1.08627	3.04647
942	0.573949	4.71959	1.33539	0.886397
943	3.12618	1.10859	1.59577	0.92452
944	0.532042	1.60017	12.5961	11.5616
945	1.52395	2.14681	8.88034	8.20815
946	0.700909	3.08773	2.43973	1.67213
947	1.10384	7.62067	2.21861	1.11319
948	0.783151	3.05958	1.85803	2.28877
949	0.568624	4.70587	1.68505	5.63562
950	0.586727	2.83465	0.873141	1.71903
951	0.699332	30.9576	12.4331	7.07814
952	0.645434	7.22245	4.7104	0.701753
953	0.58177	2.35129	11.3868	16.3942
954	0.516166	4.68126	0.967633	8.48683
955	0.557919	8.15853	1.86638	1.16703
956	1.37419	4.07739	0.637954	10.9604
957	1.15917	3.48392	3.46873	0.711457
958	0.519361	1.48529	5.59127	2.4124
959	0.543029	6.72136	2.01456	0.814604
960	0.635617	4.9568	4.08728	1.61482
961	1.25132	2.18777	3.80034	0.965729
962	0.960961	7.3003	2.48921	7.13597
963	7.07023	11.8814	8.32865	6.01727
964	0.92916	2.52179	2.16455	5.3425
965	1.13565	5.87984	0.868943	1.11677
966	1.36687	2.78336	1.25887	0.706564
967	0.745016	15.5839	5.43474	0.769587
968	0.51207	13.3914	4.12682	2.46002
969	1.7903	13.3152	8.72525	2.30751
970	1.67103	14.5223	6.50187	2.64889
971	3.67072	1.16366	1.2359	1.82678
972	1.03699	6.76459	1.76495	17.9581
973	0.47783	10.4174	13.5486	23.0228
974	2.25057	5.14785	4.15087	5.11605
975	1.52185	2.21241	3.01503	0.698779
976	3.34526	2.27887	2.24523	0.846803
977	2.29337	2.74919	18.4679	4.48055
978	1.05848	2.10718	13.6946	1.55127
979	0.533599	1.27778	5.47886	0.875874
980	0.546789	11.6802	9.72461	0.734264
981	0.604504	20.4521	6.07599	0.770438
982	4.24804	4.69763	1.96191	18.2684
983	1.8374	5.79023	1.04164	4.62572
984	0.604912	9.14605	8.21481	2.00439
985	0.547328	8.01784	1.61008	13.4873
986	0.521717	6.00858	4.44892	1.83892
987	0.517545	1.00373	5.38685	2.02244
988	1.81169	1.19366	1.22625	1.53313
989	5.36073	0.852027	4.23442	0.850754
990	2.04892	9.85272	3.69618	19.1645
991	0.514838	9.54904	1.17549	7.60469
992	1.64344	4.06626	1.73838	20.2602
993	1.14934	1.59342	0.686367	11.0142
994	2.84011	5.20194	8.24037	0.973243
995	1.18523	6.58138	6.48156	0.611397
996	4.70901	4.25156	8.38113	2.61713
997	3.51824	4.6684	3.21405	9.93658
998	1.57318	3.70424	7.56223	5.88293
999	0.551332	38.9416	7.23825	5.15453
1000	4.52824	8.18111	11.1635	4.11492
1001	0.552429	27.9188	3.8078	2.64334
1002	0.548842	26.6475	7.73477	3.99182
1003	1.08322	31.6361	3.22768	1.55178
1004	2.58514	5.66661	5.85337	1.95495
1005	0.754863	16.7853	14.5906	0.735468
1006	0.501865	20.2835	9.65405	1.03409
1007	0.640752	1.15173	1.17666	0.729525
1008	0.569578	2.68071	1.94203	0.665935
1009	1.13538	2.55915	1.30239	0.726261
1010	2.06279	1.4713	7.96075	3.83921
1011	2.55519	14.4438	4.33091	7.34459
1012	5.91563	2.53452	1.55886	40.0544
1013	1.88895	2.26074	4.35123	1.07625
1014	2.59193	14.3144	6.16539	2.37873
1015	1.6873	11.9596	6.68964	1.07012
1016	3.07475	1.09712	5.60036	1.04105
1017	0.808475	7.31927	5.74826	1.13505
1018	5.43254	39.837	5.00013	1.14098
1019	3.52246	2.68801	1.14281	0.730206
1020	0.79538	3.38912	2.06231	2.55566
1021	6.85731	5.62498	1.79133	0.609565
1022	0.858416	16.7714	1.55575	0.874675
1023	4.13014	2.74449	1.13136	1.08889
1024	1.06001	6.99298	1.7418	5.1909
1025	1.00582	6.14812	1.08985	13.0054
1026	1.25333	3.40991	1.82807	3.57265
1027	0.777934	2.40786	4.44843	5.26658
1028	4.14401	3.10146	3.08288	2.14053
1029	2.21862	9.57958	3.3592	0.86888
1030	0.86917	1.28682	1.43281	4.33455
1031	8.95972	1.36187	1.84847	0.835988
1032	0.90114	16.8498	11.6886	1.43707
1033	7.63815	16.0255	3.38024	2.0145
1034	4.82086	7.51213	2.36155	0.599181
1035	1.85688	6.40326	6.21336	1.14914
1036	2.79335	21.8957	1.46624	1.34479
1037	1.1831	5.48518	1.18573	1.37916
1038	1.06264	2.49425	0.631075	2.21805
1039	0.514337	10.9243	6.46924	1.67657
1040	1.01491	12.2807	21.3447	2.22135
1041	9.07975	6.82081	1.52939	14.112
1042	10.3086	14.4202	2.1505	5.59771
1043	4.46386	1.602	0.654173	2.01381
1044	1.39679	5.19683	0.613735	5.19147
1045	3.90098	18.4665	0.843065	4.57515
1046	1.27405	6.02397	0.822834	9.98156
1047	0.825555	7.73475	0.880277	3.85554
1048	1.80812	4.54126	2.82584	1.11787
1049	12.7551	14.8501	2.18809	2.4261
1050	1.64593	27.1173	1.42605	5.16544
1051	0.783582	1.97919	0.913254	24.9538
1052	1.26226	2.20812	0.944853	4.87983
1053	1.54639	6.49188	4.93707	6.40071
1054	1.20589	6.11081	2.26868	9.69875
1055	0.544017	10.9456	2.7554	8.07956
1056	1.08064	8.68788	2.50281	34.0173
1057	1.01522	8.52569	2.37282	2.60393
1058	0.943843	6.19145	6.43335	70.7239
1059	1.25016	1.14754	7.52823	0.938734
1060	1.56726	4.53263	1.08307	1.5022
1061	2.75615	11.6687	2.33158	2.37232
1062	1.12742	11.908	3.55155	3.55653
1063	1.14861	9.83823	9.73972	1.93805
1064	1.37074	4.10949	27.647	2.28862
1065	6.61675	1.3374	15.2082	0.852785
1066	11.6109	3.03845	1.11431	1.52858
1067	1.59361	4.00569	0.945774	6.98169
1068	2.8426	1.6965	2.76892	4.26155
1069	1.60658	5.85607	3.34372	3.60349
1070	9.66525	2.47248	7.40627	5.72136
1071	6.04515	16.8249	10.0927	27.5053
1072	6.50799	2.09698	5.57404	1.31658
1073	1.00449	3.08018	5.65737	22.0079
1074	0.998868	13.543	2.63261	1.0963
1075	2.11986	7.36042	13.1158	1.4882
1076	5.45957	34.9789	5.1457	39.7834
1077	0.919129	7.65005	3.62186	1.31089
1078	0.536493	3.10673	8.71335	3.52756
1079	3.53949	6.8772	3.44533	6.00152
1080	1.01624	2.87802	15.0238	4.34433
1081	1.63493	15.964	1.63071	9.41738
1082	1.77591	2.83555	8.49676	6.99242
1083	10.7193	2.79329	8.72563	2.98556
1084	2.36309	12.443	13.5088	1.76247
1085	0.835814	11.606	9.37971	0.912952
1086	0.616074	28.6073	9.64374	0.93842
1087	2.49892	3.2096	31.1552	1.9547
1088	1.24918	36.779	3.02281	1.43781
1089	1.05087	35.6151	17.8633	2.38496
1090	2.47501	0.649078	5.29973	1.40913
1091	0.545764	4.89422	4.67933	2.06567
1092	0.505766	5.40741	9.55997	10.1338
1093	0.49092	4.07346	5.25206	12.5648
1094	3.21893	33.1552	15.5107	0.855622
1095	0.572223	3.90516	41.4904	0.826907
1096	4.83934	2.59706	55.6151	0.724947
1097	2.56154	13.305	1.43072	3.04874
1098	1.53409	7.14272	2.89109	3.6715
1099	6.10997	3.9563	2.47225	3.23257
1100	4.10196	11.5195	11.4687	0.918819
1101	2.44527	3.93987	1.49852	1.46742
1102	0.913614	1.7051	8.6422	9.18474
1103	3.97795	9.14744	21.1793	4.71642
1104	1.66807	3.56732	16.1398	2.21656
1105	2.3147	2.02823	21.3484	8.46942
1106	1.19323	15.6174	17.9872	6.5457
1107	1.21934	37.7151	22.3318	0.891456
1108	2.82803	6.52441	57.5409	9.4861
1109	1.29782	25.7054	9.294	0.865518
1110	1.00453	17.4857	0.959847	0.778563
1111	1.14341	8.73883	0.676676	20.2996
1112	1.81791	9.29772	0.676754	16.0016
1113	2.03586	7.79207	0.465805	5.33967
1114	4.02092	3.94697	0.49642	12.968
1115	3.66519	3.05655	0.569492	0.702476
1116	4.78584	0.986936	0.511051	2.28779
1117	1.27793	1.11377	1.82225	18.1555
1118	0.927889	8.12574	0.703367	12.2335
1119	0.774967	4.55091	6.32294	20.3742
1120	1.09317	5.47715	4.28654	7.70511
1121	0.879006	7.44198	3.10149	0.769711
1122	1.04704	2.74068	9.06748	1.2653
1123	1.64148	0.972651	4.5093	3.72468
1124	1.5929	1.29396	10.5724	2.33125
1125	2.42742	4.82053	5.57783	5.64549
1126	0.646013	2.02664	21.6943	0.918743
1127	0.921246	4.33641	13.7115	1.11808
1128	2.25813	2.14907	1.95184	0.916619
1129	1.00589	6.56078	1.14213	1.45081
1130	1.33865	13.1735	2.53816	7.8338
1131	1.39868	40.4113	10.9677	8.58116
1132	1.13582	2.56192	1.21056	0.878285
1133	0.484814	3.8794	1.1071	4.89938
1134	0.524387	1.21245	1.37556	3.168
1135	0.578749	1.29307	1.16579	2.2164
1136	0.706956	2.50498	6.87572	13.4559
1137	0.433325	7.45235	0.803918	0.762632
1138	0.655667	2.06315	3.32934	2.94421
1139	0.87624	4.73051	1.60315	22.5963
1140	0.480859	15.4357	1.67664	18.3487
1141	0.397029	9.793	1.6397	4.7703
1142	0.958485	21.9929	1.61262	0.964452
1143	3.21034	8.73066	1.38453	2.14996
1144	4.82491	2.07605	5.97089	1.86695
1145	4.26141	10.7167	7.12834	10.4862
1146	7.88417	4.2707	11.3559	27.0422
1147	2.68773	5.27468	1.94724	7.94649
1148	0.917316	11.0334	5.78964	0.959702
1149	2.07716	8.54201	2.9065	3.39848
1150	0.871443	13.3616	4.17954	0.765449
1151	2.20268	40.7607	3.92361	0.862543
1152	2.50385	31.1561	13.0371	31.9608
1153	2.37149	9.39553	3.21583	13.0139
1154	1.4116	29.014	5.42626	0.805499
1155	0.767317	3.34694	3.14717	1.12496
1156	1.20671	15.0491	3.5136	1.48808
1157	0.807243	10.3284	5.41788	5.11776
1158	2.0254	8.27193	2.09778	14.5828
1159	2.22845	24.5234	2.90802	15.8275
1160	1.7995	6.56581	10.2	10.979
1161	1.74291	6.59691	11.6698	6.38697
1162	5.39014	10.843	8.79298	0.945129
1163	4.51126	2.9502	6.99375	0.977904
1164	0.896492	5.99116	32.021	1.6976
1165	1.76626	2.28823	6.48839	0.836463
1166	3.32145	4.01992	6.21584	1.12971
1167	3.62149	7.48757	3.08176	0.640929
1168	1.05052	4.94413	1.09254	8.04367
1169	11.5918	2.53999	1.54934	14.7101
1170	12.627	1.18831	5.73155	19.6562
1171	2.05908	4.27192	0.709497	2.35869
1172	2.85624	1.35714	1.92036	3.91353
1173	4.73623	4.78667	2.81245	3.35783
1174	2.75292	12.8451	2.36088	1.41831
1175	4.40809	6.31129	14.8413	0.888672
1176	1.76206	4.65209	2.88781	17.3018
1177	2.21939	4.48564	2.13994	6.19811
1178	4.20879	3.71546	2.2907	10.5524
1179	7.48748	10.318	2.44437	2.66664
1180	3.0312	3.85064	0.744833	0.702243
1181	1.40322	5.72815	3.28339	0.997864
1182	10.1987	8.2016	5.88921	13.9849
1183	1.78125	0.939066	3.35402	9.0565
1184	4.03584	3.71592	4.62042	2.23583
1185	1.65045	5.27416	2.12169	2.42029
1186	6.39853	7.72287	4.6605	1.96818
1187	1.09255	9.08203	4.73862	13.3351
1188	5.55105	9.91982	15.844	14.7965
1189	9.29605	40.0941	7.12995	0.805537
1190	3.12165	4.22074	2.93378	1.6867
1191	3.80866	2.49493	2.88507	0.702921
1192	6.35718	1.34124	0.892706	0.854734
1193	3.89422	0.891237	1.38605	2.65838
1194	2.90926	1.07518	1.81569	2.09658
1195	4.292	1.98921	3.53556	0.868401
1196	0.648087	2.71088	1.38991	10.8214
1197	2.363	3.40749	2.86052	10.4483
1198	2.32922	1.88212	15.2918	8.72949
1199	3.21418	11.2064	4.56661	28.5877
1200	2.2224	1.93225	0.942135	1.17305
1201	1.27614	0.787031	8.49493	2.68127
1202	2.18008	4.23553	1.27638	1.1655
1203	1.69209	3.51501	2.80924	4.20064
1204	5.80009	19.0306	0.582073	8.10552
1205	1.49374	9.6225	0.883639	0.927793
1206	2.18626	6.71679	0.809434	1.29054
1207	1.36821	8.05273	7.60821	6.92921
1208	0.666599	28.5845	0.986831	7.66591
1209	0.515543	7.96736	0.691217	1.78236
1210	0.607104	16.428	0.639111	11.6718
1211	0.704052	11.0826	1.07244	4.56011
1212	0.456732	4.24251	0.504163	7.03864
1213	2.45597	14.4989	0.541835	1.13465
1214	2.91116	11.7772	7.38722	0.775659
1215	1.23097	2.55216	1.59734	1.4393
1216	1.43059	7.53184	1.19529	17.1639
1217	2.44233	2.86745	1.02496	2.10744
1218	4.36166	10.6494	1.14473	5.98985
1219	3.88897	12.5293	2.51026	17.9898
1220	5.14852	4.36082	3.36615	2.40756
1221	4.31646	7.43981	0.729016	1.19258
1222	2.4178	6.82434	0.557134	12.2811
1223	2.05317	1.02184	0.671006	34.3462
1224	1.82009	6.07485	1.43144	7.96369
1225	0.748442	16.7098	0.6699	9.84501
1226	1.65297	9.60241	0.996625	8.3178
1227	3.13351	10.2515	1.321	3.68452
1228	5.15922	17.2415	1.52169	1.2712
1229	2.09448	5.97868	1.27827	5.27346
1230	15.8386	7.95824	0.664703	10.7887
1231	2.42852	30.7278	2.79593	1.17824
1232	5.1281	4.23231	1.31531	1.20041
1233	18.1324	2.82677	1.05397	2.37708
1234	0.757885	6.05548	0.662945	1.82605
1235	0.728113	1.89789	1.17038	1.39427
1236	2.87475	9.46946	5.70507	26.7191
1237	0.797845	15.4759	3.39786	2.99168
1238	0.742822	2.13465	1.40568	1.48194
1239	0.827352	1.66986	2.59685	1.61349
1240	1.3808	2.08282	8.90612	1.74611
1241	0.492611	11.3835	7.22927	2.31587
1242	0.547213	15.3923	4.63041	3.59263
1243	1.66532	19.8483	1.10467	3.54334
1244	2.77075	16.3494	9.71578	1.98091
1245	0.963157	3.52323	25.2559	3.81146
1246	0.975195	19.3909	7.36543	2.60048
1247	2.80644	12.3658	7.01279	2.23257
1248	3.25891	3.19985	6.84569	1.48566
1249	14.4443	46.3493	0.926177	3.29687
1250	21.5177	9.81411	1.48306	2.07924
1251	1.10658	13.4445	2.86329	7.71639
1252	3.16501	2.29705	2.48516	1.09956
1253	0.61142	10.8636	0.894439	5.07377
1254	0.614104	3.81214	5.71533	1.46653
1255	1.06075	7.90648	0.761998	8.49842
1256	0.936544	33.4757	0.974988	3.96734
1257	7.61093	18.8675	0.49648	2.04068
1258	10.226	7.35801	0.839749	8.39382
1259	6.93176	4.20866	0.590687	0.948854
1260	2.18588	7.05042	1.66915	4.93931
1261	1.45597	5.95325	1.02424	1.23113
1262	2.41526	12.422	0.687529	3.72945
1263	3.07344	8.08475	0.671842	16.5665
1264	8.63422	59.1348	1.06756	3.63643
1265	6.22354	8.61434	1.0097	1.019
1266	1.37682	20.1618	1.27893	2.66562
1267	3.6166	11.2936	1.04042	0.849087
1268	17.0585	34.5605	0.973239	0.661918
1269	0.935753	14.2163	4.49592	0.66813
1270	0.585018	83.1081	0.569655	0.970089
1271	1.89492	3.89028	1.07621	0.798135
1272	0.926853	5.55608	3.02626	1.23475
1273	1.32263	16.5486	4.03057	8.77638
1274	0.444555	9.28721	1.17292	1.24033
1275	2.22113	9.95927	1.37734	52.899
1276	0.876332	12.0158	2.29335	14.188
1277	1.47553	21.4847	30.0338	7.51169
1278	1.25454	7.99329	8.3877	20.2156
1279	3.68754	7.8377	0.934507	10.8086
1280	0.775974	25.8717	1.64293	10.1626
1281	0.865057	1.39603	0.763964	1.61612
1282	16.8673	1.7985	0.576909	0.719566
1283	15.0866	11.634	1.41907	2.40957
1284	13.4397	2.21865	2.52723	7.50455
1285	4.48007	14.3699	3.49726	33.8151
1286	1.04543	20.6208	14.2456	10.1366
1287	1.06264	16.029	10.5881	4.35292
1288	2.58584	29.8116	1.32224	1.80161
1289	2.48364	5.89727	13.3518	3.11668
1290	17.6375	9.72711	0.804872	10.511
1291	10.7618	7.15789	1.40166	1.31381
1292	5.2526	22.9392	1.67141	1.30014
1293	25.7609	8.63024	3.58527	0.713629
1294	11.6892	11.7327	4.71882	1.29339
1295	14.7474	5.78476	24.2795	1.51253
1296	18.2876	8.73835	3.9794	2.78331
1297	10.299	2.92773	11.4723	0.976963
1298	1.27535	7.35839	1.26962	1.20437
1299	0.541841	6.7671	1.77111	1.22817
1300	1.50084	10.7616	1.48137	0.70628
1301	0.762941	1.57072	2.86924	0.88497
1302	0.828314	10.6771	28.3537	2.19328
1303	1.36138	15.1749	15.1835	1.64866
1304	1.20611	8.62602	2.15007	0.919376
1305	0.613543	4.46829	4.24431	0.847602
1306	7.37089	36.4786	4.22386	0.864062
1307	1.86148	6.55659	2.1468	11.3047
1308	5.0193	19.0119	2.5019	1.34619
1309	1.36242	1.81173	2.23479	1.33664
1310	15.7655	8.52687	3.62731	1.17189
1311	3.07325	1.23516	2.02133	0.788819
1312	0.643625	5.03127	1.37048	3.60522
1313	0.526877	15.9904	1.90126	1.00063
1314	2.53447	30.4015	4.0415	0.940394
1315	1.18797	26.3656	1.53172	0.969708
1316	0.518943	51.7582	3.50982	3.02191
1317	0.900222	1.93935	4.41279	2.47697
1318	2.0282	2.2218	0.582289	9.21233
1319	0.627845	4.65065	0.959192	1.36884
1320	0.772897	28.4606	0.691982	1.10174
1321	1.24339	9.82978	3.39552	0.807981
1322	1.66286	2.97322	1.99846	3.65099
1323	0.592711	2.63584	0.629465	10.3393
1324	0.389176	11.7823	0.87772	7.61249
1325	0.487761	25.4136	0.988761	1.29093
1326	0.510185	27.0521	12.3235	1.57005
1327	0.581482	2.28616	6.4002	3.14979
1328	0.786971	4.82591	1.54254	0.786901
1329	0.78627	3.9488	0.879861	4.11093
1330	14.5564	4.32157	0.937347	13.9401
1331	6.08687	1.51704	2.52164	0.928301
1332	1.05158	3.26207	1.08721	1.38939
1333	0.444552	3.72509	1.04789	1.15378
1334	0.685357	1.50996	1.54327	0.809919
1335	1.18748	3.18747	2.16395	4.14121
1336	2.74058	3.90487	1.11509	1.58356
1337	0.996535	11.7387	1.54737	4.17152
1338	1.60194	6.70141	3.05524	1.28534
1339	3.52856	2.53481	6.87366	8.32246
1340	1.61439	4.72152	1.35747	14.1443
1341	1.18391	2.46782	1.25577	8.58078
1342	4.0195	3.04365	0.568924	6.33231
1343	1.20197	8.99924	1.78163	9.71232
1344	8.6593	9.97259	3.03386	12.038
1345	2.88363	4.21932	2.13844	4.21405
1346	1.56109	4.44279	2.30705	1.66974
1347	3.5191	3.9077	2.15032	7.71916
1348	3.02551	2.86925	3.54095	0.884752
1349	2.97581	13.0056	0.958457	0.692381
1350	1.43441	1.50314	3.19091	0.996805
1351	0.475256	31.0469	3.01546	0.97053
1352	1.87941	12.1734	12.7945	0.908094
1353	2.61787	22.0453	0.922706	2.42195
1354	6.83512	2.43698	1.58807	23.0937
1355	0.796445	8.55113	10.2398	1.61474
1356	1.6779	15.4279	8.69968	1.92159
1357	2.34154	12.1531	7.17957	1.8172
1358	0.765948	14.7784	3.41308	3.46005
1359	2.21735	13.005	1.09626	0.792761
1360	7.16759	3.24803	2.39932	0.956866
1361	3.90313	2.51079	23.6865	1.26634
1362	0.97532	16.9071	1.2872	1.01019
1363	0.814688	8.19982	2.62937	0.869167
1364	3.57479	26.9858	3.60957	1.99262
1365	0.542142	4.43459	0.887312	3.49405
1366	1.0334	1.96084	2.00103	0.970131
1367	1.76758	24.3301	5.80108	0.876347
1368	0.602284	1.42326	5.38097	11.5257
1369	0.693975	3.4521	5.85015	7.29847
1370	3.59552	1.7146	7.81442	0.839358
1371	0.620453	2.2515	1.8917	0.917248
1372	0.50296	5.22717	1.56463	13.7503
1373	0.717992	8.36908	5.68962	4.04118
1374	0.750589	2.35648	1.43667	6.97273
1375	0.457416	7.01883	1.90122	0.734788
1376	0.608922	20.9392	1.7028	0.89394
1377	1.45179	2.68533	1.75102	1.06119
1378	0.715346	12.7726	1.37726	0.841443
1379	0.602977	6.5255	2.26687	0.785548
1380	0.627521	7.77049	1.9072	1.05705
1381	1.44751	3.4453	2.35915	0.864075
1382	0.589119	1.05333	2.96562	2.3016
1383	0.873773	5.21486	4.01591	0.899969
1384	3.49326	6.45203	1.5173	10.3916
1385	0.811468	18.7576	1.13455	7.86086
1386	2.08937	5.72757	4.39421	4.02064
1387	0.496466	3.34792	1.49806	1.6189
1388	0.495529	4.66232	2.33788	0.903057
1389	0.974993	2.57307	3.82953	0.776785
1390	1.59867	24.8274	5.30025	1.42532
1391	4.71971	5.03591	3.19581	0.895476
1392	1.27825	2.599	2.62329	4.28265
1393	0.763633	14.7028	2.29558	1.72536
1394	1.98353	7.43832	0.999744	1.86976
1395	4.12369	3.50546	5.9259	12.696
1396	1.43325	6.03105	0.934291	22.6247
1397	1.38884	4.01245	5.15526	1.76345
1398	1.18456	3.34192	2.37282	1.09534
1399	17.0325	21.3832	1.86587	0.63494
1400	7.4592	8.75697	1.42578	8.71998
1401	3.18603	10.8374	1.47313	1.02703
1402	1.05721	10.2394	2.9331	32.1559
1403	0.789418	31.3125	2.07862	0.875923
1404	0.627726	30.0374	2.51928	3.34711
1405	2.28188	19.6235	0.812512	25.2875
1406	1.58774	62.0703	0.754772	1.9139
1407	2.02088	36.9649	1.5562	4.78136
1408	0.582717	4.07083	1.10507	1.32203
1409	0.402565	8.39315	0.814998	0.848615
1410	5.22925	43.1963	1.30179	1.52562
1411	3.08062	6.79031	3.8256	0.864176
1412	1.07996	11.3144	1.30245	0.747079
1413	0.462795	13.1098	0.660905	0.862314
1414	0.933	36.675	0.741256	0.794494
1415	1.63624	63.8073	0.900648	0.948162
1416	5.47645	73.3697	0.588396	2.12477
1417	1.70401	56.6698	0.720216	2.25717
1418	6.26959	18.6441	1.34767	8.20165
1419	2.20163	35.1823	0.928557	7.29152
1420	2.94543	49.1786	0.761745	4.13204
1421	1.78791	7.74901	3.192	2.27128
1422	1.90976	1.4552	3.30185	3.83711
1423	2.68425	3.18526	0.94895	6.34964
1424	0.651205	4.52307	3.89013	11.0213
1425	0.82699	5.77006	8.51696	6.78355
1426	1.95652	13.9687	2.49749	3.66307
1427	8.34748	0.772865	1.30928	1.05834
1428	2.35265	3.55393	1.87862	8.84459
1429	0.978407	14.1173	1.9636	6.44323
1430	8.86082	10.7	0.599961	6.19065
1431	1.70183	5.77017	0.502381	2.48237
1432	1.88474	10.5751	0.664225	2.58426
1433	1.20524	7.34832	4.56322	0.742675
1434	6.28145	13.9306	9.87266	0.923911
1435	4.72165	6.26509	5.44514	4.31654
1436	1.65803	3.98528	3.90575	0.664109
1437	8.49662	9.91616	6.90748	1.89844
1438	0.659899	2.60479	4.11683	0.777979
1439	3.36162	4.11546	2.10277	1.00446
1440	4.9977	8.60859	1.08817	2.62551
1441	8.55262	29.3288	1.29536	6.88702
1442	1.81426	2.10358	1.66512	0.869017
1443	1.86392	0.833861	9.65924	4.10004
1444	1.4842	2.26813	2.33312	0.925543
1445	1.34691	2.17322	12.0343	3.67938
1446	4.87575	14.9015	8.07612	17.4369
1447	1.29974	2.30571	18.9353	1.20328
1448	3.20493	3.66936	4.12808	9.8415
1449	1.43829	1.45747	1.78179	5.28975
1450	3.09894	1.06198	6.12411	6.41515
1451	2.51341	3.6633	1.37	0.755559
1452	2.17485	5.79132	0.526743	1.01425
1453	1.20589	8.33376	0.838237	2.40529
1454	1.89536	3.29776	4.4237	1.55185
1455	0.501651	27.2873	2.3231	0.870618
1456	3.69135	2.8168	0.805431	4.76042
1457	6.99601	6.56107	0.755511	2.20065
1458	3.73195	2.09431	1.29356	4.1114
1459	0.731779	2.45315	1.98318	1.16544
1460	1.51041	7.01178	3.37268	5.68982
1461	2.72422	7.47058	8.0468	3.93781
1462	1.38373	4.13594	2.59062	10.5162
1463	3.46739	8.57313	8.01014	3.32352
1464	4.80636	4.09957	2.04458	1.41811
1465	3.81845	2.81244	0.582911	3.58394
1466	3.49647	1.47564	2.17952	13.29
1467	0.779812	3.58386	4.00421	9.30959
1468	9.38428	19.6478	5.05768	0.863496
1469	3.63826	4.61303	6.22191	2.63501
1470	1.49544	5.37925	12.6415	2.0324
1471	2.96117	3.28208	2.75327	1.03456
1472	1.68603	1.52828	2.70467	0.793279
1473	6.12229	2.78499	0.869543	4.64336
1474	1.05402	43.2419	1.38072	1.36827
1475	1.68498	20.8255	2.67178	0.937565
1476	2.04141	4.44555	3.31356	2.6981
1477	0.970695	9.85364	1.20073	1.4435
1478	2.01951	8.27757	1.76039	1.31472
1479	0.641982	2.2585	1.88576	1.2886
1480	3.64862	11.1322	1.28697	1.71489
1481	0.706242	1.44453	8.72475	1.0594
1482	1.02778	19.4574	2.17481	1.28981
1483	0.715118	21.603	1.88222	23.5718
1484	1.3927	15.3945	2.05005	0.682015
1485	1.60365	28.2577	16.7806	1.35463
1486	1.82323	5.12044	6.81691	3.33802
1487	1.09176	5.27944	1.96612	1.64211
1488	8.8778	1.76823	3.54842	0.709109
1489	2.50143	36.1714	8.52727	1.37699
1490	6.0891	7.63436	12.4606	1.91765
1491	2.8516	0.903164	7.64161	1.46144
1492	0.579731	1.25976	2.95392	4.33224
1493	1.0815	8.52381	5.46337	14.4011
1494	2.42044	5.43521	3.10963	10.5838
1495	2.75301	4.75151	1.99697	2.96512
1496	1.44523	23.3471	0.78142	9.099
1497	0.56512	27.7223	0.443155	2.89314
1498	0.684893	27.0498	3.82825	1.96533
1499	32.0714	41.073	2.22088	2.15515
1500	8.90042	8.25987	6.44329	8.48932
1501	1.50657	1.97484	1.96146	3.6912
1502	0.691576	1.51947	0.584274	16.5873
1503	0.908572	1.06352	2.78089	1.90252
1504	2.61116	2.02397	18.6775	1.69821
1505	0.567094	14.2755	6.66936	0.990558
1506	1.01782	2.75218	3.14498	1.72007
1507	1.43406	3.33291	4.11618	5.78816
1508	0.74063	3.90793	7.98229	3.45902
1509	3.21064	27.1034	2.79078	3.3836
1510	1.48597	6.47069	4.93366	1.36029
1511	1.30197	6.45571	1.77097	18.5798
1512	3.03287	0.894093	0.693259	2.51262
1513	2.5576	0.759547	13.611	2.01649
1514	9.76655	5.14516	10.1234	6.35719
1515	1.3346	5.49573	4.75593	10.0663
1516	2.2873	1.96368	5.13357	20.3217
1517	4.3647	9.06961	0.963376	2.68105
1518	2.36152	8.54887	2.02082	1.62326
1519	8.74733	7.79945	1.16163	1.73654
1520	7.00062	5.95704	0.756021	5.78337
1521	2.19255	6.51234	1.6611	2.42268
1522	4.41163	5.80783	4.80037	5.32942
1523	12.8086	14.5041	2.64472	2.71171
1524	1.40252	8.84894	2.98769	2.19692
1525	3.33996	5.39858	0.5072	3.24203
1526	3.70934	26.9982	11.2183	2.67363
1527	0.550211	35.7387	1.88569	2.59235
1528	0.512039	10.4709	0.781308	1.32314
1529	0.8174	11.2871	1.14305	1.35514
1530	8.40161	4.56958	4.28493	1.4415
1531	1.11222	3.4391	3.91429	0.644257
1532	1.6786	17.45	4.78827	1.75098
1533	8.70535	8.23635	1.00562	0.826058
1534	1.1804	3.00533	1.39146	1.65533
1535	3.53317	12.189	2.11296	2.06261
1536	3.64538	14.8221	3.74818	1.12402
1537	3.24189	10.1973	1.85631	1.02963
1538	6.78773	3.32653	1.02358	12.3521
1539	4.27252	4.5666	1.97977	4.73816
1540	0.742764	9.69093	1.26502	62.371
1541	1.70771	8.11239	3.65687	1.00918
1542	0.844814	3.68637	1.40407	3.1178
1543	5.53894	7.38084	1.85059	0.957326
1544	3.09441	6.39485	1.37518	0.728135
1545	1.19596	10.6312	11.1435	0.803744
1546	2.25656	5.08267	1.63579	1.0168
1547	9.83155	4.11665	27.3457	1.91405
1548	2.28771	4.93911	4.08515	4.82164
1549	1.41496	10.825	1.37111	11.2452
1550	7.83487	3.48543	1.08594	2.53318
1551	0.747529	24.0912	2.6952	7.97406
1552	0.629496	4.94451	1.55732	4.3037
1553	9.18354	1.43606	1.4473	1.10489
1554	3.76603	5.67481	0.725532	1.05861
1555	13.0243	3.87004	0.450848	11.2531
1556	17.2407	8.88929	0.971088	1.57085
1557	1.84706	8.17431	3.21215	2.09856
1558	2.2466	10.1855	1.4637	3.20857
1559	2.20376	10.9862	0.798472	2.76823
1560	2.67572	7.73179	0.47984	2.75791
1561	6.99312	6.16654	3.44778	2.28881
1562	4.26247	12.7988	1.08688	9.32536
1563	1.18708	6.7462	2.21923	0.742926
1564	13.3885	7.56678	3.40974	2.13098
1565	16.4328	3.91045	0.850908	2.64364
1566	1.78159	6.31983	2.21383	0.721711
1567	14.3816	6.05908	0.972053	1.58606
1568	11.6161	16.5203	4.72539	0.945457
1569	4.40824	7.78219	0.70811	1.04591
1570	6.35388	3.70298	2.87683	0.716995
1571	11.8865	7.40178	2.97236	0.782328
1572	2.68303	9.65188	4.37163	1.05919
1573	4.42196	1.19937	5.20241	1.41163
1574	5.28859	6.63439	1.33879	1.10872
1575	2.73102	5.89687	1.77497	1.16386
1576	1.0008	4.90032	0.798969	2.50049
1577	3.87549	2.90384	3.11397	0.717332
1578	11.6286	4.70132	1.40204	1.03332
1579	6.3194	10.2795	6.42391	2.796
1580	4.8445	12.5465	0.729006	1.70777
1581	3.03927	1.6997	0.667372	1.5926
1582	4.32245	1.98092	0.59392	0.715856
1583	10.6285	19.7807	2.70124	1.26096
1584	2.92827	12.1453	4.23134	1.16252
1585	3.52952	1.16676	2.44941	1.06565
1586	1.05434	3.34767	7.55129	0.928583
1587	3.33077	4.0353	8.62489	2.00363
1588	1.06917	5.49836	2.80201	0.797851
1589	0.953127	49.9614	0.836617	0.952956
1590	0.699519	4.39847	1.04955	14.4068
1591	2.19045	24.0505	4.94573	2.63556
1592	8.11643	4.61417	1.39338	2.20524
1593	6.00532	13.9884	3.00065	8.90286
1594	7.21737	6.27664	1.49077	1.86055
1595	4.89207	10.2798	11.8279	2.11137
1596	7.19201	1.16563	0.686282	1.83975
1597	16.4598	2.05861	1.16292	2.11869
1598	2.05269	7.33332	2.47007	1.1413
1599	1.82567	6.85072	1.07737	16.0836
1600	3.16625	20.1263	1.79068	0.963188
1601	10.2584	3.62371	0.949394	3.34414
1602	7.61073	4.59429	1.25098	8.31014
1603	5.17209	4.85582	5.51892	1.82061
1604	0.600573	7.77575	12.8986	0.820377
1605	1.07921	2.02766	0.566985	1.58862
1606	2.26142	1.66765	0.684146	2.15655
1607	2.28545	2.71258	0.533326	5.18018
1608	4.80359	8.33738	0.645389	2.73297
1609	8.77766	2.34249	0.958556	1.67075
1610	5.96042	2.35884	0.975664	1.43254
1611	5.94853	4.03527	0.53149	2.0564
1612	1.43264	4.10472	0.966284	8.4113
1613	2.75161	5.93118	1.19193	0.899517
1614	7.19119	2.26062	0.81263	1.37215
1615	3.05978	4.1591	7.25774	12.6755
1616	4.14565	9.20394	8.97415	16.7434
1617	3.02983	5.42842	16.5193	1.47789
1618	4.36991	3.27347	1.13584	1.1066
1619	4.94334	4.43926	2.41464	1.25905
1620	4.08041	2.61229	1.35768	1.18784
1621	7.51114	5.46645	0.738653	1.36639
1622	1.06734	2.19153	1.11117	1.36549
1623	11.5147	3.25218	2.99437	3.83865
1624	3.23973	1.24971	1.84481	1.21774
1625	8.59331	4.36683	11.9624	2.02382
1626	3.65396	5.79913	1.51439	2.29735
1627	3.07128	5.14745	0.825864	11.2582
1628	1.74157	8.81747	0.774908	1.51008
1629	0.87113	34.9617	0.55979	7.391
1630	2.90864	3.53866	0.631195	2.81695
1631	3.09811	3.81448	1.26491	1.23139
1632	2.11734	5.96709	2.42122	1.91737
1633	3.71025	1.58709	0.998515	1.29259
1634	1.13945	4.11481	1.08197	1.82099
1635	0.625983	2.85294	0.836818	0.988853
1636	0.783609	4.74119	0.892903	12.2758
1637	5.47153	6.30529	0.981834	9.16524
1638	6.87783	2.05332	0.790952	1.44458
1639	1.9329	3.40236	0.930157	0.927386
1640	3.54528	6.64974	0.82897	2.43356
1641	4.43631	2.50309	2.03944	1.0836
1642	5.54912	1.33469	1.32849	2.53058
1643	2.29925	0.972418	0.592283	6.02649
1644	2.70772	3.98626	3.14684	7.12466
1645	2.08992	3.1922	8.24974	2.67674
1646	1.57777	1.97413	3.66736	2.61795
1647	3.61168	2.05715	7.27379	3.59136
1648	3.90969	1.59621	2.35452	3.21962
1649	3.96028	2.63399	1.38203	1.6053
1650	2.13506	0.934692	0.572084	0.778822
1651	0.938344	3.17184	1.31656	3.96915
1652	0.523046	3.14371	3.59371	0.845489
1653	4.50739	3.32321	1.33687	6.98849
1654	0.807132	2.48264	14.5411	2.36197
1655	2.42609	1.43502	5.25	0.824612
1656	1.93196	1.15409	26.1339	1.02865
1657	0.524528	0.889392	4.66142	1.18813
1658	2.18188	3.78574	66.3695	1.27326
1659	3.11564	3.33039	37.0067	9.93278
1660	0.538294	0.959717	20.7517	3.22482
1661	3.69966	3.71251	46.9499	11.7026
1662	2.48685	9.5675	28.5786	1.62725
1663	0.665892	6.58384	2.22034	4.71306
1664	0.685121	4.75922	0.992818	1.01656
1665	1.86627	22.9555	4.21195	4.77019
1666	0.574751	7.82845	2.68481	1.82737
1667	0.664141	5.04712	5.83002	3.03396
1668	2.13003	1.3114	1.12789	1.43992
1669	2.72127	3.24208	2.24332	2.25323
1670	0.595099	0.96665	3.17697	1.2873
1671	1.24594	1.02286	4.27143	1.07315
1672	2.18684	1.16583	9.86749	1.39492
1673	4.57667	5.61274	2.24333	1.61876
1674	0.943206	6.36151	2.80612	0.992432
1675	1.84054	6.04546	8.01243	3.9873
1676	1.48477	0.933968	10.2527	3.61788
1677	0.745779	1.24735	8.02206	4.28937
1678	2.80546	9.89742	7.34599	1.3844
1679	1.01584	5.86522	14.602	2.5441
1680	1.29768	25.624	1.68769	0.842773
1681	0.853754	3.76925	8.83129	0.839238
1682	4.61424	5.12896	8.37266	1.56525
1683	5.24176	1.1451	1.45797	5.56559
1684	3.63358	3.69185	3.07904	3.36326
1685	4.19199	9.30538	3.16884	4.57567
1686	21.8554	14.8943	1.68365	1.20044
1687	1.55051	7.01885	0.923934	1.65553
1688	18.8947	1.03102	3.92703	8.49779
1689	8.20877	4.15735	1.36142	1.74985
1690	4.56028	1.28124	1.24448	2.36501
1691	2.81608	1.16257	1.51106	5.40601
1692	0.748715	1.06376	9.7233	0.694389
1693	0.976556	2.88366	0.704271	1.06421
1694	0.885205	3.39525	1.11881	0.945463
1695	4.09781	3.80542	1.01918	11.9234
1696	1.69594	3.48589	0.831555	2.09303
1697	1.35874	1.97165	0.598291	1.17142
1698	3.76451	3.42289	0.732521	7.01765
1699	1.32452	2.37552	1.58577	1.16193
1700	1.17133	6.56747	1.01606	17.1892
1701	2.2369	6.03858	1.13546	15.2911
1702	1.70992	3.46352	0.973003	1.77059
1703	0.671355	2.27976	0.777264	2.20695
1704	1.62663	5.74451	1.74502	9.15099
1705	7.3304	10.1729	1.4613	2.40898
1706	5.1462	3.27021	5.81979	0.954673
1707	4.84779	7.51683	0.575728	1.73926
1708	1.11242	2.70239	0.672861	2.65806
1709	1.31044	3.33531	0.826777	1.00024
1710	2.62371	2.63512	2.27819	3.05504
1711	1.60383	1.03033	0.8049	1.00299
1712	0.926535	0.947758	2.36075	2.37289
1713	9.51956	1.28429	1.09317	5.53275
1714	1.89197	1.43013	0.764438	0.7958
1715	4.3935	1.29315	2.89164	0.956324
1716	5.33168	15.9026	1.42329	0.961968
1717	10.5167	11.2487	3.82385	0.811402
1718	7.81398	1.91448	4.28188	1.95952
1719	4.92705	17.5132	2.51095	0.922247
1720	4.5961	3.90553	3.51261	0.862999
1721	4.52751	1.51977	1.91318	2.55974
1722	4.7139	15.6274	2.32236	1.97274
1723	1.89628	4.89754	3.39809	1.14045
1724	1.7754	7.90755	1.05941	8.11536
1725	2.61124	23.9366	0.598557	1.03711
1726	2.61738	7.85494	1.34497	1.2462
1727	1.45672	5.93938	4.96182	3.75656
1728	2.97935	4.24108	0.852235	0.84362
1729	3.53125	11.3543	1.41426	2.11898
1730	1.44882	14.0435	1.00268	4.76125
1731	1.49598	3.38752	3.86421	3.09379
1732	3.38722	4.50955	0.530522	3.09698
1733	0.670716	8.02698	0.588294	1.09815
1734	7.42644	1.64937	1.45651	2.17544
1735	1.79407	6.90616	0.790989	8.16157
1736	2.82788	10.6516	0.587191	1.04652
1737	1.55519	17.294	2.18586	8.09882
1738	15.4431	8.06752	0.91183	2.81584
1739	7.22461	9.93769	0.759366	0.93971
1740	0.727456	1.91185	0.694409	0.95142
1741	0.953984	42.8816	0.657755	1.74762
1742	1.01731	12.8989	0.595279	10.7999
1743	1.122	46.1047	1.76477	8.47802
1744	4.96258	21.8345	3.23516	16.6725
1745	3.02816	31.1937	1.02354	4.62185
1746	2.77053	5.72895	1.67612	2.76967
1747	6.39657	18.8501	5.3851	7.80769
1748	2.61395	32.861	9.67352	2.48574
1749	2.59768	3.44361	3.50712	1.09574
1750	1.95472	20.0667	8.7525	0.891149
1751	1.60325	25.6745	3.49393	0.918213
1752	1.24073	21.9549	5.46443	1.03828
1753	5.89121	21.2203	8.87045	1.55905
1754	5.05581	5.20773	2.62363	1.58333
1755	2.55524	7.86356	0.661001	1.48484
1756	3.78088	4.57533	0.901384	1.81051
1757	2.55797	20.0833	0.809244	1.49397
1758	2.49186	6.05906	3.20364	2.29713
1759	0.900537	11.6502	2.60947	10.9913
1760	0.965087	5.81202	1.08543	6.07628
1761	2.92002	6.2799	0.964856	6.52976
1762	1.90142	1.6186	1.21325	1.11254
1763	1.04678	15.0875	2.1641	1.78116
1764	3.58481	8.90354	10.2449	1.06663
1765	6.69647	5.71156	1.42258	1.75947
1766	2.22869	3.12899	1.23537	1.33542
1767	0.717873	3.61145	1.44134	1.69208
1768	1.30724	1.45892	0.712342	1.88673
1769	1.94637	7.58204	0.917597	1.07108
1770	1.26724	2.16335	0.9625	4.41696
1771	5.04419	15.3338	1.32	1.64876
1772	0.924216	21.3055	7.29004	0.782362
1773	1.73273	18.1443	4.68133	4.13255
1774	1.17837	2.89616	8.96642	2.22402
1775	1.16388	10.947	1.59194	0.881158
1776	4.56061	2.44859	0.951649	2.04712
1777	2.77567	9.89187	0.974478	1.17945
1778	2.54116	1.34596	3.53931	6.00509
1779	3.43114	9.47471	1.85551	1.98199
1780	2.15306	11.9547	0.727443	1.94854
1781	3.70494	13.1486	1.36443	1.74113
1782	2.35392	3.07484	1.12779	10.4791
1783	1.23604	4.53902	1.14751	5.66317
1784	1.87674	3.30708	1.66429	1.43844
1785	0.722387	35.5958	0.824962	8.87956
1786	1.21876	17.7522	0.813303	1.25592
1787	1.51334	6.45041	1.57978	3.57668
1788	1.1596	3.47828	0.795752	4.14111
1789	3.57366	6.76553	1.01692	9.16044
1790	2.05399	7.38286	1.46983	3.94502
1791	14.7801	6.8298	0.831801	2.24176
1792	1.38334	4.62443	1.45716	2.65854
1793	4.0547	5.2001	1.86357	10.6428
1794	2.07455	4.35511	1.4872	1.17303
1795	2.62309	2.8103	0.723866	10.1742
1796	1.10632	4.5238	0.561997	0.913245
1797	5.06704	20.4984	0.62922	2.56079
1798	8.65054	6.87586	5.17063	0.732
1799	4.92955	11.1973	1.03511	1.39651
1800	2.59594	0.997542	1.03383	1.10056
1801	1.31119	6.04637	1.1221	1.16974
1802	1.08733	14.032	0.985384	2.10193
1803	1.41268	11.1607	0.736268	4.55083
1804	0.628441	25.5166	6.00872	1.67666
1805	0.968979	12.3639	1.05267	2.03906
1806	1.10605	27.4449	6.03973	9.8818
1807	13.4218	11.9859	1.92522	6.01945
1808	9.1815	1.10878	1.04791	0.898944
1809	2.06552	9.47858	3.38837	4.48056
1810	0.748859	3.13961	1.26154	0.865641
1811	2.55359	19.0098	3.26347	0.914649
1812	1.8436	4.78922	4.35539	1.16257
1813	3.82324	10.0932	3.37464	0.877008
1814	2.27802	4.31071	7.74914	1.06686
1815	0.51369	9.89451	0.972096	0.899789
1816	0.902607	1.3497	1.13314	1.01524
1817	2.25125	2.43672	1.25032	1.12112
1818	0.831475	5.25683	1.07682	1.21855
1819	11.4391	1.39307	0.586172	0.950124
1820	0.892612	0.954143	0.706004	3.08562
1821	2.17972	5.83192	1.34532	3.90263
1822	0.584647	5.55263	1.72392	8.39788
1823	6.03814	6.07509	2.30295	1.31796
1824	3.20046	6.69793	6.32659	8.37409
1825	0.689347	7.79817	8.46613	1.35431
1826	0.862585	8.88078	1.62468	1.07899
1827	1.83418	10.3805	1.70108	2.95983
1828	3.12183	4.22876	1.39208	0.902275
1829	0.909299	7.0754	1.12443	4.21351
1830	7.10903	4.1905	1.39233	1.06261
1831	4.42375	6.87365	5.44751	0.90893
1832	2.13205	1.67923	5.41695	0.906163
1833	1.55383	1.69372	4.68576	5.99704
1834	2.37835	2.33296	0.991016	1.03275
1835	2.90169	2.7918	1.30801	1.11829
1836	1.99362	1.67495	0.701545	3.08742
1837	1.36848	2.17274	1.28877	1.77949
1838	6.36703	2.25789	0.841388	0.978875
1839	1.06316	3.55857	1.36807	1.03414
1840	0.894169	2.98492	0.629278	3.01531
1841	5.27017	2.29222	1.25391	1.93845
1842	3.54114	7.75459	0.807023	6.15241
1843	3.33337	4.24291	1.14995	2.18111
1844	7.05931	7.00985	1.4145	1.05729
1845	5.12656	1.24805	0.8331	1.2493
1846	1.17209	2.98132	6.68304	6.64021
1847	1.84495	4.62804	6.1688	1.89284
1848	3.60445	5.90364	2.35395	1.4478
1849	1.71088	1.06903	1.02867	2.59114
1850	0.981644	2.69057	1.42716	5.31401
1851	0.679928	1.16483	8.20272	0.93626
1852	0.713623	1.06614	1.94861	1.92423
1853	1.45647	0.991381	0.936164	3.00231
1854	1.94309	4.90316	0.997096	1.03567
1855	14.4602	1.15839	4.73306	1.03053
1856	3.2812	2.82156	1.92766	0.88898
1857	3.44098	2.411	7.10385	0.777462
1858	5.48824	1.68943	1.41533	0.713045
1859	4.1396	0.782823	1.20245	0.743877
1860	3.11577	0.782916	2.28133	1.18526
1861	3.41151	4.83945	4.13878	1.24736
1862	2.24652	3.75023	1.44816	0.827863
1863	5.6432	0.910429	2.07464	5.85952
1864	1.2211	5.35427	1.12391	12.5063
1865	5.0355	7.5185	3.7981	1.46983
1866	8.5812	6.00573	4.09724	1.79343
1867	1.86028	4.56586	1.53755	3.78088
1868	4.15255	13.1443	0.646915	12.4968
1869	3.7993	2.93472	3.76299	5.24178
1870	2.69214	4.65027	2.26385	3.46437
1871	2.68851	4.21778	1.30353	7.45781
1872	2.06	12.0219	2.86424	3.46876
1873	1.88681	1.82982	1.37044	2.97287
1874	1.64392	1.34521	2.40327	3.71932
1875	1.89848	1.60396	1.48363	1.06598
1876	1.19673	5.82154	1.09974	2.20685
1877	4.51038	20.1839	4.45942	5.67102
1878	4.0054	5.41929	8.21246	1.10809
1879	8.76129	2.99862	22.2429	0.822871
1880	3.02854	4.81962	1.07044	3.01525
1881	1.37468	6.92818	1.28466	2.44939
1882	1.1898	2.08357	2.27638	0.894566
1883	3.13062	2.02841	3.49633	0.734756
1884	1.81122	1.50296	8.05285	3.78379
1885	1.10896	1.54524	4.98724	1.75851
1886	0.862918	1.70882	3.45782	3.50765
1887	1.20398	1.10075	1.82381	2.04192
1888	1.41679	3.21924	0.970411	1.03449
1889	0.847645	1.08182	0.695856	0.949184
1890	3.51404	3.69323	3.21883	4.97342
1891	1.3019	12.4716	5.82181	1.82695
1892	0.677838	3.4192	0.894397	1.81297
1893	6.22228	1.55582	1.20685	1.08452
1894	9.08631	1.76002	0.943071	1.56124
1895	3.70782	2.98319	0.764004	4.28194
1896	2.26	16.2706	0.659956	1.69202
1897	1.5506	4.79204	1.68025	1.11547
1898	6.18378	26.8214	2.35365	0.91933
1899	4.93282	3.98329	21.5869	0.763232
1900	1.07491	2.75537	21.0169	8.88693
1901	1.94409	26.1967	17.8244	1.1877
1902	6.37414	1.77996	3.92303	1.18663
1903	6.5027	4.90929	1.86727	1.15002
1904	4.3512	72.7829	0.725676	1.67676
1905	0.977797	1.85847	31.0681	0.961938
1906	3.19236	4.71781	4.97956	1.75007
1907	2.11239	6.62103	6.36412	3.04487
1908	2.07653	7.09501	1.83185	3.30123
1909	2.4785	3.14147	4.19909	0.950781
1910	1.62181	1.57067	3.29696	0.98396
1911	2.03584	1.93532	6.72919	0.920993
1912	1.4111	6.51659	1.68357	8.81097
1913	2.13249	1.69656	25.6637	1.32518
1914	1.92322	3.09306	1.7708	15.8761
1915	1.04244	8.4493	1.80855	1.02949
1916	4.23985	72.0988	2.09904	0.787545
1917	3.8447	68.3637	2.21696	0.932322
1918	0.716775	10.5696	1.44441	2.5942
1919	0.633737	16.8713	1.83615	2.67977
1920	1.10889	3.77258	1.78119	33.0477
1921	1.12437	7.10666	3.68338	0.878468
1922	4.58083	20.779	0.5781	0.872785
1923	6.14546	11.6329	1.47732	3.86599
1924	10.4004	1.54326	0.976526	0.834803
1925	8.9088	6.04786	3.03955	0.867434
1926	10.8884	11.3859	1.89545	5.64714
1927	7.3766	30.7143	3.53678	4.8704
1928	3.17372	11.437	1.83962	1.7794
1929	1.95637	2.43294	2.52421	0.771973
1930	3.22094	2.76272	1.87679	2.5967
1931	4.58605	5.00373	3.00188	0.939716
1932	2.15079	0.778075	1.33003	3.74499
1933	3.51362	1.60198	1.34968	21.4956
1934	1.6583	2.95603	11.5643	1.99859
1935	1.07639	6.61891	5.68147	3.72645
1936	2.60876	7.87805	2.04389	0.819966
1937	4.25478	4.94423	1.05098	7.98088
1938	9.92342	1.24937	2.07454	0.774764
1939	8.06607	40.7415	0.949424	11.3221
1940	1.40365	6.31738	1.18616	1.96622
1941	3.95699	3.94575	1.52458	5.59123
1942	6.6597	4.2391	0.657327	10.7112
1943	33.5104	4.89957	1.24499	14.9994
1944	2.09293	10.7336	2.27612	7.33714
1945	13.5658	5.21552	5.40894	8.27414
1946	6.05792	11.4102	6.00699	4.44251
1947	1.86399	13.4589	8.91927	4.36604
1948	3.63074	1.2698	3.65849	1.23731
1949	0.878549	2.38175	8.67865	10.1041
1950	2.02122	8.90794	4.44421	1.4815
1951	20.1254	7.65699	1.26571	7.28341
1952	6.90556	2.43755	2.55015	4.74202
1953	5.92068	2.97752	2.23958	6.78663
1954	2.11237	2.83265	1.59052	1.4455
1955	18.3866	6.62419	1.40211	4.22082
1956	21.6255	7.63261	12.5186	5.43244
1957	9.25534	4.68806	2.46672	2.04714
1958	3.27467	21.697	25.4871	9.72509
1959	2.97588	17.7592	10.4477	0.816022
1960	4.59629	11.5443	8.48204	0.936
1961	5.00268	1.90538	16.3899	0.843892
1962	0.774392	1.52454	6.90766	10.1424
1963	4.17377	7.99087	6.18349	6.77371
1964	6.78952	25.0841	8.37271	5.43421
1965	13.3544	6.17644	4.26135	9.20524
1966	1.76406	19.1282	9.31649	11.2582
1967	37.5372	10.0278	0.8641	2.66834
1968	34.922	1.16546	1.88576	1.76329
1969	6.7689	8.18543	5.90462	1.56069
1970	7.81166	8.27663	5.10175	2.67836
1971	12.6168	5.60053	5.31062	1.97837
1972	2.59982	14.3607	1.27973	1.46933
1973	11.4123	2.39715	1.3954	1.09556
1974	17.9585	4.11374	0.773685	8.05546
1975	3.49149	3.50888	3.29788	1.70054
1976	3.7152	2.79073	0.56867	2.54965
1977	10.4131	10.8381	0.514521	20.6162
1978	10.7422	3.75291	0.968362	22.7087
1979	21.6727	3.31328	0.941038	6.62508
1980	6.08514	19.612	0.970721	1.31278
1981	14.4702	3.88438	0.900365	5.50458
1982	7.47892	7.68882	2.15889	3.93915
1983	4.10132	9.0536	0.777904	17.9872
1984	3.85607	2.3928	0.830993	2.95232
1985	8.14467	6.09674	1.33108	0.806998
1986	2.90911	14.858	0.814968	8.52892
1987	8.37956	16.5626	7.95289	7.14596
1988	3.11533	3.80474	10.1067	3.92043
1989	13.2404	4.91524	10.8096	2.57455
1990	3.42047	12.5547	10.7078	6.76689
1991	1.29973	11.4643	12.7331	1.04155
1992	57.7632	11.8394	13.1331	2.44857
1993	4.25513	3.60081	30.8596	1.99859
1994	3.68756	2.11922	1.6179	1.17264
1995	16.7252	8.24541	5.93674	4.76816
1996	2.28348	8.88117	8.99707	7.56801
1997	3.59957	4.88821	5.92837	1.27837
1998	1.26246	5.04085	3.08544	22.4111
[truncated: 12,157 more rows]

## Sheet: PDX1
Cell ID	sgCtrl	sgT-REX17				General Statistics	Violin plot
1	4549.22	4131.88					sgCtrl	sgT-REX17		in BOLD the statistics displayed in the violin
2	4505.43	3872.47				n cells	17657	5279
3	4420.05	3353.2				Minimum	900,0	900,0
4	4416.95	3203.54				25% Percentile	1442	986,0
5	4401.88	3123.76				Median	1791	1117
6	4315.08	3088.64				75% Percentile	2227	1348
7	4273.91	3084.31				Maximum	4549	4132
8	4264.27	3083.96				Range	3649	3232
9	4213.81	2974.25				Mean	1873	1219
10	4154.52	2942.76				Std. Deviation	575,6	322,5
11	4141.48	2897.46
12	4105.99	2857.79
13	4088.17	2800.79
14	4078.85	2798.41
15	4072.64	2781.13
16	4069.87	2769.82
17	4066.15	2764.99
18	4064.72	2760.81				% PDX1+ cells (MFI=900 cutoff)	Bar plot				PDX1 median MFI (of PDX1+ cells)	Violin
19	4060.92	2722.54				Replicate	sgCtrl	sgT-REX17			Replicate	sgCtrl	sgT-REX17
20	4058.61	2722.27				1	27.3358	3.69714			1	2109.83	1337.46
21	4054.99	2712.57				2	34.0413	11.3534			2	2146.7	1282.58
22	4029.42	2695.23				3	21.3287	6.88511			3	2289.59	1133.01
23	4009.61	2666.85				4	36.4639	6.62917			4	1874.96	1211.2
24	4003.49	2663.25				5	42.3085	17.9357			5	1658.45	1143.69
25	3989.26	2660.64				6	47.2426	6.04185			6	1622.17	1081.1
26	3977.22	2637.72				7	36.5869	19.0925			7	1821.13	1130.39
27	3959.99	2628.85				8	32.1197	3.95257			8	2078.96	1113.33
28	3941.08	2623.79				9	46.8428	19.8794			9	1703.61	1016.33
29	3928.03	2596.16				10	40.1393	18.7872			10	1443.63	1083.14
30	3909.69	2579.89
31	3908.31	2546.3
32	3895.92	2515.28
33	3880.69	2509.96
34	3878.33	2506.34
35	3856.76	2489.39
36	3855.62	2469.99
37	3851.68	2469.75
38	3851.29	2464.39
39	3849.55	2462.5
40	3835.71	2453.22
41	3832.16	2442.23
42	3829.65	2433.79
43	3826.57	2423.26
44	3811.42	2404.15
45	3810.53	2398.65
46	3810.33	2389.71
47	3807.74	2387.56
48	3804.61	2368.61
49	3793.93	2360.47
50	3793.11	2350.22
51	3787.35	2335.46
52	3778.56	2331.37
53	3769.4	2322.48
54	3763.08	2322.09
55	3758.06	2312.4
56	3750.54	2299.79
57	3748.56	2291.26
58	3746.08	2290.28
59	3743.98	2286.07
60	3737.48	2283.35
61	3736.98	2282.33
62	3728.41	2280.64
63	3725.26	2261.83
64	3711.7	2243.62
65	3706.05	2243.55
66	3696.33	2239.94
67	3687	2236.87
68	3685.71	2235.76
69	3681.2	2234.17
70	3660.82	2231.79
71	3659.54	2231.42
72	3658.88	2219.43
73	3657.06	2215.01
74	3655.96	2209.09
75	3651.85	2208.44
76	3651.06	2204.08
77	3649.45	2202.72
78	3643.76	2200
79	3642.29	2199.47
80	3640.7	2198.9
81	3633.03	2193.87
82	3628.92	2191.07
83	3624.5	2188.28
84	3623.47	2181.02
85	3623.4	2180
86	3622.44	2177.77
87	3620.99	2169.82
88	3617.26	2165.83
89	3616.24	2165.5
90	3615.49	2164.86
91	3609	2164.57
92	3607	2161.67
93	3604.4	2156.9
94	3604.04	2156.56
95	3601.99	2156.31
96	3599.82	2155.99
97	3599.38	2151.95
98	3596.15	2144.35
99	3592.62	2140.83
100	3591.62	2139.54
101	3589.03	2138.43
102	3587.19	2130.86
103	3587.04	2130.49
104	3583.87	2128.71
105	3577.84	2127.83
106	3574.17	2127.61
107	3574.12	2124.54
108	3571.21	2123.89
109	3568.28	2123.73
110	3567.08	2122.08
111	3567.07	2120.95
112	3564.1	2120.89
113	3563.22	2120.17
114	3562.49	2117.15
115	3561.18	2107.8
116	3558.26	2107.76
117	3555.77	2106.45
118	3554.91	2105.59
119	3552.92	2098.62
120	3551.74	2097.01
121	3548.83	2094.43
122	3548.44	2082.87
123	3544.83	2082.63
124	3543.71	2075.8
125	3541.28	2073.73
126	3536.36	2068.56
127	3534.28	2068.48
128	3532.81	2065.39
129	3531.97	2061.87
130	3530.58	2060.98
131	3529.57	2056.01
132	3527.98	2052.77
133	3524.16	2051
134	3522.26	2050.83
135	3519.66	2047.41
136	3518.75	2046.3
137	3514.01	2042.34
138	3511.88	2041.5
139	3510.59	2041.28
140	3510.39	2039.49
141	3510.22	2034.66
142	3505.1	2029.31
143	3504.91	2025.47
144	3503.12	2022.97
145	3502.05	2022.94
146	3500.79	2022.25
147	3499.37	2017.12
148	3499.35	2015.21
149	3495.14	2013.2
150	3492.25	2012.99
151	3491.02	2010.42
152	3490.13	2010.2
153	3489.04	2009.47
154	3487.8	2007.36
155	3487.69	2007.31
156	3483.9	2005.07
157	3483.36	2004.58
158	3481.12	2001.1
159	3480.62	2000.74
160	3480.33	2000.03
161	3477.51	1999.59
162	3476.35	1998.61
163	3475.14	1995.41
164	3475.1	1994.15
165	3473.54	1993.37
166	3472.85	1993.1
167	3472.48	1993.03
168	3470.17	1988.06
169	3469.14	1984.31
170	3463.9	1983.07
171	3463.64	1977.37
172	3457.46	1976.86
173	3455.82	1975.65
174	3455.59	1974.25
175	3454.71	1971.21
176	3453.99	1967.54
177	3449.84	1964.5
178	3446.45	1964.04
179	3444.04	1964
180	3438.3	1962.59
181	3437.78	1959.53
182	3436.84	1954.73
183	3436.59	1951.96
184	3435.74	1949.36
185	3435.52	1948.84
186	3434.38	1948.52
187	3432.67	1947.47
188	3432.27	1946.54
189	3430.86	1945.64
190	3430.56	1943.23
191	3430.29	1942.07
192	3428.38	1938.39
193	3428.28	1937.41
194	3427.19	1937.07
195	3424.2	1936.9
196	3423.58	1934.57
197	3417.6	1932.56
198	3416.87	1932.5
199	3413.57	1931.62
200	3413.14	1930.74
201	3409.01	1929.99
202	3407.88	1927.75
203	3407.78	1926.32
204	3406.26	1926.2
205	3404.62	1925.82
206	3400.98	1925.22
207	3400.26	1922.79
208	3396.15	1922.21
209	3395.49	1920.57
210	3395.15	1920.57
211	3393.4	1919.75
212	3391.58	1914.11
213	3388.81	1911.79
214	3388.1	1910.88
215	3386.92	1910.02
216	3386.38	1909.98
217	3386.36	1907
218	3385.13	1906.72
219	3385.04	1904.81
220	3384.14	1902.11
221	3381.37	1901.12
222	3380.46	1898.45
223	3378.82	1898.03
224	3376.64	1897.36
225	3373.69	1894.84
226	3372.82	1894.47
227	3371.51	1894.23
228	3368.69	1893.44
229	3367.16	1893
230	3366.19	1892.15
231	3366.12	1890.22
232	3365.16	1890.1
233	3364.22	1888.71
234	3360.54	1888.03
235	3359.25	1887.88
236	3358.73	1887.62
237	3358.2	1887.48
238	3356.54	1886.62
239	3355.43	1886.05
240	3353.73	1882.54
241	3352.92	1882.34
242	3351.37	1881.95
243	3350.7	1880.09
244	3345.38	1879.25
245	3342.73	1878.9
246	3336.33	1875.41
247	3336.05	1875.28
248	3335.59	1874.8
249	3335.53	1873.82
250	3333.25	1873.47
251	3331.52	1872.37
252	3331.15	1872.15
253	3330.17	1869.81
254	3329.84	1868
255	3328.82	1866.48
256	3328.45	1865.42
257	3325.57	1864.64
258	3325.11	1863.36
259	3324.3	1862.25
260	3323.96	1858.11
261	3322.82	1855.37
262	3322.66	1853.92
263	3320.97	1853.71
264	3320.72	1851.46
265	3318.67	1851.27
266	3318.6	1844.58
267	3318.48	1844.28
268	3317.94	1842.74
269	3317.74	1842.58
270	3316.83	1842.14
271	3316.24	1841.66
272	3316.18	1840.98
273	3315.57	1839.74
274	3315.56	1838.01
275	3314.22	1837.9
276	3313.66	1835.13
277	3312.72	1833.97
278	3309.23	1833.48
279	3309.09	1832.6
280	3308.21	1831.75
281	3307.02	1831.3
282	3305.88	1830.36
283	3303.74	1830.34
284	3302.77	1830.15
285	3301.02	1829.91
286	3300.49	1829.63
287	3299.48	1828.01
288	3297.41	1827.21
289	3296.1	1825.66
290	3295.96	1825.57
291	3292.69	1825.02
292	3292.18	1823.63
293	3291.83	1822.64
294	3291.58	1822.63
295	3287.56	1821.69
296	3286.99	1821.43
297	3286.72	1819.6
298	3286.48	1818.04
299	3286.35	1815.17
300	3284.66	1815.09
301	3283.6	1814.72
302	3283.36	1811.03
303	3283.12	1810.01
304	3282.67	1809.38
305	3282.43	1808.17
306	3281.6	1807.66
307	3281.3	1807.38
308	3276.88	1806.3
309	3274.67	1805.42
310	3271.67	1803.61
311	3271.48	1802.89
312	3269.11	1802.75
313	3264.9	1802.65
314	3263.26	1800.93
315	3262.06	1800.23
316	3258.55	1798.89
317	3257.49	1798.34
318	3257.43	1798.33
319	3257.06	1798.24
320	3256.81	1797.03
321	3255.53	1796.49
322	3254.06	1796.32
323	3252.24	1795.97
324	3251.96	1794.93
325	3251.52	1794.68
326	3250.79	1794.18
327	3250.61	1792.64
328	3250.46	1792.29
329	3250.46	1791.77
330	3250.04	1789.33
331	3249.65	1789.03
332	3249.45	1788.64
333	3248.88	1788.08
334	3248.04	1787.48
335	3247.37	1785.02
336	3246.83	1784.99
337	3246.55	1784.36
338	3246.19	1784.05
339	3245.22	1783.4
340	3245.17	1783.38
341	3245.04	1783.2
342	3243.85	1782.57
343	3243.29	1782.53
344	3242.2	1782.15
345	3241.6	1781.84
346	3239.82	1780.11
347	3239.47	1777.97
348	3239.11	1777.8
349	3239.04	1777.53
350	3238.49	1777.18
351	3237.57	1775.9
352	3235.61	1775.75
353	3235.54	1775.54
354	3235.47	1775.21
355	3234.78	1775.16
356	3234.68	1773.67
357	3233.89	1772.62
358	3233.48	1772.57
359	3230.81	1771.7
360	3229.43	1770.56
361	3225.73	1770.36
362	3224.87	1769.62
363	3224.85	1769.21
364	3224.48	1768.41
365	3224.06	1768.3
366	3223.15	1765.98
367	3222.74	1764.96
368	3222.57	1764.54
369	3221.21	1764.46
370	3221.09	1764.21
371	3218.37	1763.99
372	3218.11	1763.91
373	3217.69	1763.77
374	3217.07	1763.64
375	3217.02	1762.71
376	3217.01	1761.68
377	3215.01	1760.68
378	3214.04	1759.97
379	3213.59	1758.57
380	3212.42	1758.53
381	3211.72	1757.66
382	3211.63	1757.23
383	3208.56	1757.06
384	3207.69	1755.79
385	3206.72	1755.56
386	3206.42	1754.73
387	3206.02	1753.26
388	3202.08	1753.21
389	3200.98	1753.16
390	3200.57	1753.04
391	3199.94	1752.53
392	3199.88	1752.46
393	3199.34	1751.99
394	3199.25	1751.85
395	3198.57	1751.1
396	3198.55	1751.01
397	3197.91	1750.49
398	3196.8	1750.19
399	3194.93	1749.35
400	3193.99	1748.64
401	3192.95	1748.54
402	3192.45	1748.52
403	3192.21	1748.23
404	3191.9	1746.48
405	3191.78	1746.13
406	3191.26	1746.01
407	3190.44	1745.42
408	3189.39	1744.99
409	3188.12	1741.56
410	3188.08	1739.43
411	3187.07	1739.06
412	3186.28	1738.07
413	3185.43	1737.08
414	3185.25	1735.23
415	3184.51	1734.86
416	3182.99	1734.77
417	3182	1733.58
418	3181.89	1732.75
419	3180.77	1731.42
420	3180.38	1731.34
421	3180.25	1731.2
422	3178.88	1731.16
423	3178.58	1730.55
424	3178.49	1730.25
425	3177.51	1727.89
426	3176.8	1727.27
427	3174.41	1726.51
428	3173.37	1725.56
429	3172.74	1725.1
430	3172.62	1724.21
431	3172.44	1724.2
432	3171.5	1722.83
433	3171.45	1722.76
434	3171.45	1721.72
435	3170.37	1721.67
436	3169.94	1720.94
437	3169.65	1719.54
438	3169.62	1719.25
439	3169.22	1718.45
440	3168.96	1717.94
441	3168.14	1717.07
442	3167.73	1715.29
443	3167.63	1715.09
444	3167.63	1713.71
445	3167.28	1712.81
446	3167.07	1712.76
447	3166.12	1711.58
448	3165.98	1710.15
449	3165.77	1709.66
450	3165.28	1709.57
451	3165.1	1707.88
452	3164.01	1707.54
453	3162.79	1707.14
454	3161.54	1706.46
455	3161.06	1705.38
456	3160.41	1704.44
457	3160.31	1704.16
458	3160.14	1703.57
459	3159.36	1703.28
460	3158.65	1702.91
461	3158.57	1701.97
462	3158.51	1701.08
463	3157.07	1700.81
464	3156.93	1700.32
465	3156.29	1699.94
466	3156.24	1699.86
467	3156	1699.58
468	3155.89	1699.47
469	3155.25	1699.09
470	3154.77	1697.2
471	3153.78	1696.94
472	3153.57	1696.18
473	3152.41	1695.79
474	3152.31	1695.03
475	3152.23	1694.95
476	3152.21	1694.7
477	3151.17	1694.59
478	3150.81	1693.78
479	3150.2	1693.75
480	3150.02	1693.03
481	3147.27	1692.75
482	3146.74	1691.68
483	3146.71	1691.35
484	3145.91	1691.03
485	3145.49	1689.83
486	3145.01	1688.95
487	3142.89	1688.8
488	3142.03	1688.57
489	3141.4	1687.06
490	3141.17	1686.44
491	3141.03	1686.04
492	3140.99	1685.75
493	3140.78	1683.86
494	3140.69	1683.68
495	3140.39	1679.76
496	3140.22	1678.97
497	3138.71	1678.35
498	3137.84	1678.22
499	3137.81	1678.16
500	3137.51	1677.86
501	3136.28	1677.26
502	3136.12	1676.44
503	3135.96	1676.12
504	3135.89	1675.12
505	3135.86	1674.9
506	3134.41	1674.89
507	3134.31	1674.43
508	3133.19	1673.2
509	3133.1	1672.35
510	3132.97	1671.88
511	3132.1	1670.83
512	3130.31	1670.18
513	3130.18	1669.81
514	3130.06	1668.15
515	3129.79	1666.47
516	3128.79	1666.46
517	3127.92	1666.44
518	3127.56	1663.85
519	3125.78	1662.51
520	3125.67	1661.34
521	3124.84	1660.39
522	3124.05	1659.63
523	3123.23	1659.62
524	3123.08	1654.47
525	3123.04	1654.17
526	3121.25	1653.96
527	3120.96	1653.09
528	3119.37	1651.32
529	3118.28	1650.35
530	3117.47	1649.86
531	3117.11	1649.42
532	3117.05	1648.96
533	3116.31	1647.89
534	3116.03	1647.86
535	3115.97	1647.86
536	3114.56	1647
537	3112.43	1646.68
538	3112.02	1645.9
539	3111.13	1645.5
540	3110.69	1645.43
541	3109.1	1644.8
542	3108.31	1643.72
543	3107.83	1643.25
544	3105.4	1643.06
545	3105.02	1642.82
546	3105.01	1642.7
547	3104.8	1642.26
548	3104.54	1642.1
549	3104.31	1641.85
550	3102.91	1641.65
551	3102.58	1640.64
552	3102.35	1640.28
553	3100.14	1637.41
554	3099.2	1635.66
555	3097.89	1633.42
556	3097.41	1631.18
557	3096.23	1629.21
558	3095.56	1628.68
559	3094.83	1627.92
560	3094.56	1626.15
561	3094.52	1626.09
562	3094.19	1624.7
563	3093.96	1623.81
564	3093.7	1623.2
565	3093.31	1623.13
566	3093.21	1622.97
567	3092.41	1621.49
568	3092.09	1621.33
569	3091.38	1620.42
570	3091.26	1619.9
571	3090.88	1619.79
572	3090.85	1618.54
573	3090.74	1617.85
574	3090.39	1617.81
575	3090.29	1617.44
576	3088.78	1617.27
577	3088.02	1616.01
578	3087.67	1615.68
579	3087.14	1615.32
580	3086.25	1615.11
581	3086.08	1615.09
582	3085.82	1615.06
583	3085.69	1614.5
584	3085.63	1614.47
585	3083.82	1614.41
586	3083.42	1612.86
587	3083.39	1612.8
588	3081.75	1612.64
589	3081.04	1611.74
590	3080.99	1611.43
591	3080.59	1611.25
592	3080.48	1611.1
593	3080.45	1610.24
594	3080.17	1610.07
595	3080.12	1609.74
596	3080.01	1609.06
597	3079.92	1608.71
598	3079.1	1608.66
599	3079.03	1608.53
600	3078.86	1608.06
601	3078.59	1607.73
602	3077.98	1607.15
603	3077.13	1606.98
604	3076.36	1604.64
605	3075.5	1604.6
606	3074.64	1603.1
607	3074.12	1602.82
608	3073.22	1602
609	3073.13	1601.79
610	3072.34	1600.71
611	3072.28	1600.55
612	3072.19	1599.88
613	3071.42	1599.75
614	3070.19	1597.67
615	3069.94	1597.42
616	3069.51	1594.26
617	3065.67	1593.89
618	3065.36	1592.64
619	3064.81	1590.89
620	3064.06	1590.27
621	3063.86	1589.98
622	3063.64	1589.18
623	3062.25	1589.13
624	3061.76	1588.64
625	3061.23	1588.41
626	3060.42	1588.34
627	3060.15	1587.75
628	3060.1	1587.41
629	3059.08	1587.21
630	3058.89	1587.09
631	3058.34	1586.25
632	3057.58	1585.66
633	3056.73	1585.48
634	3056.73	1585
635	3055.83	1584.33
636	3055.09	1583.68
637	3054.84	1583.29
638	3054.79	1583.09
639	3053.85	1582.98
640	3053.17	1582.39
641	3053.08	1582.18
642	3052.83	1581.96
643	3052.47	1581.82
644	3051.04	1581.38
645	3050.87	1581.29
646	3050.83	1579.72
647	3050.7	1579.19
648	3049.89	1578.89
649	3049.1	1578.21
650	3048.57	1578.04
651	3048.5	1576.45
652	3048.27	1576.42
653	3047.32	1576.09
654	3046.39	1576.08
655	3046.33	1575.95
656	3046.3	1575.4
657	3044.03	1575.34
658	3041.74	1575.34
659	3041.6	1574.38
660	3040.77	1574.23
661	3039.26	1572.99
662	3038.19	1571.95
663	3038.03	1571.56
664	3036.7	1570.9
665	3036.22	1570.73
666	3036.06	1569.97
667	3035.5	1569.6
668	3035.13	1569.08
669	3034.78	1568.66
670	3034.53	1568.48
671	3034.22	1567.79
672	3034.01	1565.75
673	3033.61	1565.13
674	3033.3	1565.01
675	3032.05	1564.86
676	3031.66	1564.14
677	3031.12	1564.13
678	3030.91	1563.65
679	3030.71	1563.02
680	3030.63	1562.95
681	3030.15	1562.53
682	3029.69	1562.18
683	3029.37	1561.69
684	3029.08	1561.04
685	3028.75	1561.01
686	3027.79	1560.93
687	3027.13	1560.63
688	3027.12	1560.6
689	3026.66	1560.13
690	3026.14	1559.46
691	3025.67	1559.3
692	3024.53	1558.37
693	3024.25	1558.26
694	3023.59	1558.21
695	3023.29	1558.14
696	3022.69	1557.26
697	3022.52	1556.88
698	3022.42	1556.58
699	3022.24	1556.49
700	3022.24	1556.44
701	3021.7	1556.41
702	3021.4	1556.29
703	3020.41	1556.29
704	3018.02	1555.57
705	3017.97	1554.88
706	3017.27	1554.1
707	3016.63	1552.99
708	3015.92	1552.72
709	3014.95	1552.17
710	3014.58	1551.85
711	3013.85	1551.52
712	3012.92	1551.46
713	3012.66	1550.44
714	3012.59	1549.02
715	3012.59	1548.95
716	3012.43	1548.81
717	3011.56	1548.58
718	3010.49	1548.08
719	3010.33	1546.49
720	3009.19	1546.41
721	3008.95	1545.18
722	3008.81	1544.59
723	3008.74	1544.29
724	3008.63	1543.92
725	3008.15	1543.59
726	3008.12	1543.59
727	3007.93	1541.68
728	3007.69	1541.47
729	3007.49	1541.03
730	3006.23	1540.61
731	3006.1	1540.43
732	3005.98	1540.3
733	3005.62	1540.19
734	3005.4	1540.05
735	3005.09	1539.78
736	3003.5	1539.3
737	3003.46	1538.2
738	3003.16	1537.39
739	3002.88	1536.91
740	3002.68	1536.68
741	3002.29	1535.99
742	3001.75	1535.3
743	3000.76	1534.01
744	3000.46	1533.35
745	2999.28	1533.07
746	2999.22	1532.94
747	2999.11	1532.67
748	2998.98	1531.62
749	2997.62	1531.4
750	2997.39	1531.29
751	2996.09	1531.27
752	2995.36	1531.18
753	2995.22	1531.08
754	2995.12	1530.95
755	2994.18	1530.85
756	2994.16	1530.64
757	2993.69	1530.02
758	2993.54	1529.64
759	2993.03	1529.57
760	2992.94	1529.35
761	2991.6	1529.13
762	2990.04	1528.85
763	2989.89	1528.77
764	2989.85	1528.19
765	2989.59	1527.88
766	2989.3	1527.5
767	2989.1	1527.44
768	2989.02	1527.11
769	2988.41	1526.63
770	2986.55	1526.55
771	2984.94	1526.4
772	2984.48	1526.38
773	2983.41	1525.8
774	2983	1525.17
775	2982.65	1524.75
776	2982.65	1524.65
777	2982.33	1523.58
778	2981.98	1523.32
779	2981.01	1523.3
780	2980.71	1523.12
781	2980.19	1523.08
782	2979.14	1521.33
783	2979.05	1521.27
784	2978.55	1521.21
785	2978.41	1521.14
786	2977.54	1521
787	2977.01	1520.5
788	2975.07	1520.04
789	2974.94	1520.02
790	2974.54	1519.98
791	2974.01	1519.94
792	2973.26	1519.52
793	2972.53	1518.9
794	2972.17	1518.83
795	2971.92	1518.8
796	2971.81	1518.36
797	2971.47	1518.08
798	2971.3	1517.53
799	2971.25	1517.52
800	2971.11	1517.07
801	2970.8	1516.13
802	2970.7	1515.79
803	2968.47	1515.74
804	2968.28	1515.65
805	2968.02	1515.65
806	2967.31	1514.88
807	2967.29	1514.8
808	2966.86	1514.7
809	2966.68	1514.6
810	2966.67	1513.51
811	2966.27	1513.01
812	2965.62	1512.84
813	2964.98	1512.48
814	2964.55	1512.25
815	2964.19	1511.67
816	2964.09	1511.32
817	2963.97	1511.17
818	2963.44	1511.1
819	2962.82	1510.28
820	2962.36	1509.57
821	2962.34	1509
822	2961.79	1508.88
823	2961.72	1508.64
824	2960.45	1508.09
825	2960.25	1507.71
826	2959.76	1507.62
827	2959.46	1507.32
828	2959.34	1507.08
829	2959.18	1507.07
830	2958.88	1506.32
831	2958.24	1506.05
832	2957.84	1505.42
833	2957.81	1505.25
834	2957.76	1505.1
835	2957.55	1504.98
836	2957.37	1504.72
837	2957.33	1504.39
838	2956.81	1503.79
839	2956.47	1503.19
840	2954.01	1501.91
841	2953.88	1501.53
842	2953.75	1501.51
843	2953.08	1501.23
844	2952.93	1501.19
845	2952.89	1501.01
846	2952.86	1500.96
847	2952.33	1500.63
848	2952.16	1500.2
849	2952.15	1500.09
850	2951.67	1499.99
851	2951.17	1499.82
852	2950.55	1499.41
853	2950.16	1499.35
854	2949.85	1498.12
855	2949.36	1497.74
856	2949.32	1497.58
857	2947.83	1497.47
858	2947.07	1496.39
859	2947.04	1496.35
860	2946.95	1495.76
861	2946.8	1495.72
862	2946.72	1495.35
863	2946.57	1495.21
864	2946.45	1495.03
865	2946.18	1494.64
866	2946.11	1494.3
867	2946.05	1493.95
868	2945.27	1493.52
869	2944.41	1493.37
870	2944.07	1493.2
871	2943.88	1491.99
872	2943.46	1491.58
873	2943.07	1491.1
874	2942.85	1491.04
875	2942.52	1490.21
876	2941.99	1489.77
877	2941.47	1489.5
878	2940.68	1489.2
879	2939.54	1489.15
880	2939.47	1489.13
881	2938.6	1488.3
882	2938.48	1487.76
883	2938.14	1486.29
884	2938	1486.22
885	2937.93	1486.08
886	2937.62	1485.32
887	2937.49	1485.31
888	2937.39	1484.86
889	2936.36	1484.66
890	2936.18	1483.75
891	2935.7	1483.4
892	2935.59	1483.12
893	2934.78	1482.79
894	2933.03	1481.98
895	2932.71	1481.89
896	2932.11	1481.39
897	2931.62	1481.11
898	2931.36	1480.23
899	2931.33	1479.63
900	2930.85	1479.58
901	2930.73	1478.28
902	2929.88	1478.14
903	2929.64	1477.8
904	2929.54	1477.37
905	2928.96	1476.99
906	2928.7	1476.95
907	2928.37	1476.66
908	2927.08	1476.63
909	2926.23	1476.29
910	2925.88	1476.26
911	2925.52	1475.72
912	2925.51	1475.6
913	2925.24	1475.05
914	2924.72	1474.66
915	2924.39	1474.31
916	2924.12	1473.85
917	2924.03	1473.37
918	2923.32	1473.21
919	2922.79	1473.21
920	2922.71	1473.18
921	2922.53	1473.1
922	2922.48	1472.89
923	2922.19	1472.64
924	2921.13	1472.14
925	2920.25	1471.76
926	2920.1	1471.09
927	2919.83	1470.06
928	2918.78	1468.85
929	2918.78	1468.44
930	2918.75	1468.19
931	2918.62	1467.44
932	2918.6	1467.35
933	2918.22	1466.85
934	2917.59	1466.7
935	2917.48	1466.53
936	2917.38	1466.51
937	2917.29	1466.48
938	2915.92	1466.11
939	2915.9	1465.26
940	2914.91	1464.6
941	2914.24	1464.39
942	2913.58	1464.23
943	2913.51	1463.5
944	2912.6	1462.89
945	2912.48	1462.62
946	2912.43	1462.54
947	2911.66	1462.26
948	2911.66	1461.88
949	2911.26	1461.69
950	2910.98	1460.76
951	2910.91	1460.33
952	2910.54	1460.27
953	2909.84	1459.9
954	2909.79	1459.62
955	2909.74	1459.55
956	2909.59	1459.45
957	2909.55	1459.31
958	2908.93	1459.08
959	2908.88	1458.36
960	2908.78	1457.64
961	2908.75	1456.47
962	2908.62	1456.39
963	2908.56	1456.31
964	2908.27	1456.2
965	2907.92	1455.81
966	2907.88	1455.74
967	2907.61	1455.47
968	2907.59	1454.92
969	2907.44	1454.39
970	2906.83	1454.06
971	2906.76	1453.4
972	2906.68	1452.69
973	2906.64	1452.6
974	2906.03	1452.31
975	2905.29	1451.58
976	2905.15	1451.4
977	2904.08	1451.25
978	2903.72	1451.18
979	2903.66	1451.05
980	2902.6	1450.69
981	2902.57	1450.15
982	2902.33	1450.14
983	2902.33	1449.75
984	2902.18	1449.49
985	2901.61	1449.31
986	2900.55	1448.92
987	2900.48	1448.69
988	2900.17	1448.6
989	2900.09	1446.77
990	2899.75	1446.51
991	2899.59	1446.33
992	2899.54	1446
993	2899.29	1445.6
994	2899.17	1445
995	2898.79	1444.75
996	2898.72	1443.96
997	2898.09	1443.56
998	2898	1443.55
999	2897.54	1443.14
1000	2896.57	1442.05
1001	2896.13	1442.02
1002	2895.65	1441.12
1003	2895.36	1441.02
1004	2895.24	1440.45
1005	2894.8	1439.32
1006	2894.77	1439.02
1007	2894.48	1438.46
1008	2894.44	1438.37
1009	2894.41	1438.32
1010	2894.26	1438.03
1011	2893.89	1437.53
1012	2893.87	1437.12
1013	2892.7	1436.74
1014	2892.64	1436.22
1015	2892.52	1435.98
1016	2892.12	1435.82
1017	2892.1	1435.69
1018	2891.47	1435.38
1019	2891.34	1435.01
1020	2890.66	1434.81
1021	2890.43	1434.69
1022	2889.94	1434.44
1023	2889.81	1433.72
1024	2889.35	1433.63
1025	2889.07	1433.25
1026	2888.93	1433.09
1027	2888.87	1432.75
1028	2888.22	1432.13
1029	2887.91	1432.05
1030	2887.82	1431.37
1031	2887.42	1430.99
1032	2887.27	1430.93
1033	2887.17	1430.93
1034	2886.79	1430.64
1035	2886.72	1430.47
1036	2886.61	1430.29
1037	2886.37	1430.26
1038	2885.18	1430.13
1039	2885.02	1429.57
1040	2884.91	1429.11
1041	2884.46	1429.07
1042	2884.31	1428.94
1043	2883.2	1428.69
1044	2883	1428.34
1045	2881.98	1427.92
1046	2881.87	1427.61
1047	2881.45	1427.57
1048	2880.76	1427.03
1049	2880.68	1426.93
1050	2880.46	1426.72
1051	2880.14	1426.5
1052	2879.92	1426.32
1053	2879.1	1426.12
1054	2879	1425.49
1055	2878.68	1424.65
1056	2878.62	1424.59
1057	2878.56	1424.45
1058	2878.48	1423.85
1059	2878.4	1423.66
1060	2878.4	1423.6
1061	2877.4	1423.55
1062	2876.9	1423.54
1063	2876.78	1423.28
1064	2876.55	1422.64
1065	2876.19	1422.4
1066	2874.91	1421.73
1067	2874.56	1421.46
1068	2874.14	1421.2
1069	2873.9	1420.69
1070	2873.81	1420.32
1071	2871.75	1420.03
1072	2871.59	1419.92
1073	2870.67	1419.65
1074	2869.88	1419.12
1075	2869.62	1418.94
1076	2869.23	1418.59
1077	2868.6	1418.53
1078	2867.83	1418.42
1079	2867.79	1418.41
1080	2867.71	1418.15
1081	2867.69	1417.78
1082	2867.57	1417.66
1083	2867.14	1417.63
1084	2867.13	1417.61
1085	2866.85	1417.52
1086	2866.83	1417.14
1087	2866.66	1416.86
1088	2866.54	1416.35
1089	2866.3	1416.2
1090	2866.18	1415.78
1091	2865.37	1415.39
1092	2865.04	1415
1093	2864.89	1414.94
1094	2864.69	1414.26
1095	2864.35	1413.33
1096	2864.34	1413.16
1097	2863.42	1412.42
1098	2863.33	1411.77
1099	2862.02	1410.82
1100	2861.82	1410.7
1101	2861.64	1410.28
1102	2860.99	1410.16
1103	2860.97	1410.01
1104	2860.63	1409.99
1105	2860.56	1409.79
1106	2860.14	1409.78
1107	2860.07	1408.7
1108	2859.98	1408.63
1109	2859.81	1408.3
1110	2859.68	1408.1
1111	2859.15	1407.67
1112	2859.06	1407.59
1113	2858.49	1407.29
1114	2858.09	1407.24
1115	2857.74	1406.73
1116	2857.73	1406.53
1117	2857.31	1406.11
1118	2856.29	1405.44
1119	2856.22	1404.71
1120	2854.91	1404.43
1121	2854.88	1404.2
1122	2854.77	1404.03
1123	2854.71	1403.76
1124	2854.19	1402.59
1125	2853.86	1402.2
1126	2853.37	1401.6
1127	2852.58	1401.08
1128	2852	1400.42
1129	2851.26	1400.14
1130	2851.06	1399.87
1131	2850.53	1399.38
1132	2850.29	1399.19
1133	2850.21	1398.62
1134	2849.95	1397.72
1135	2849.45	1397.58
1136	2849.07	1397.54
1137	2848.92	1397.48
1138	2848.9	1397.41
1139	2848.67	1397.31
1140	2848.46	1396.96
1141	2847.08	1396.92
1142	2847.06	1396.8
1143	2847	1395.53
1144	2845.45	1395.5
1145	2845.27	1395.41
1146	2844.87	1395.08
1147	2843.55	1394.89
1148	2843.53	1394.87
1149	2843.52	1394.85
1150	2843.48	1394.83
1151	2843.07	1394.69
1152	2842.07	1394.52
1153	2841.06	1394.2
1154	2841.04	1393.62
1155	2840.79	1393.36
1156	2840.79	1392.33
1157	2840.64	1392.19
1158	2840.63	1392.16
1159	2839.82	1391.67
1160	2839.78	1390.68
1161	2839.77	1390.51
1162	2839.25	1390.46
1163	2839.21	1390.23
1164	2839.07	1389.83
1165	2838.39	1389.79
1166	2838.3	1389.76
1167	2838.05	1389.18
1168	2837.62	1389.07
1169	2837.4	1388.31
1170	2837.3	1387.47
1171	2837.16	1387.47
1172	2836.92	1387.3
1173	2836.13	1387.29
1174	2835.84	1387.11
1175	2835.51	1386.68
1176	2835.44	1386.66
1177	2835.13	1386.61
1178	2834.56	1386.56
1179	2834.24	1386.34
1180	2833.73	1386.13
1181	2833.62	1385.47
1182	2833.32	1384.36
1183	2832.98	1384.27
1184	2832.84	1383.9
1185	2832.82	1383.63
1186	2832.07	1383.39
1187	2832	1383.18
1188	2831.72	1383.04
1189	2831.43	1382.92
1190	2831.17	1382.84
1191	2831.03	1382.47
1192	2831.02	1382.2
1193	2830.49	1382.07
1194	2830.43	1382.03
1195	2830.39	1381.97
1196	2829.75	1381.5
1197	2829.56	1381.47
1198	2828.82	1381.09
1199	2828.29	1381.04
1200	2828.28	1380.63
1201	2827.92	1380.15
1202	2827.9	1380.15
1203	2827.77	1379.61
1204	2827.37	1379.41
1205	2827.36	1378.95
1206	2827.26	1378.24
1207	2827.06	1377.86
1208	2826.64	1377.85
1209	2826.46	1377.53
1210	2826.43	1377.38
1211	2826.29	1377.35
1212	2826.21	1377.28
1213	2825.69	1376.65
1214	2825.66	1376.49
1215	2825.51	1376.31
1216	2824.85	1376.1
1217	2824.63	1376.04
1218	2824.26	1375.93
1219	2824.16	1375.93
1220	2824.16	1375.61
1221	2824.01	1375.56
1222	2823.75	1375.39
1223	2823.55	1375.34
1224	2822.14	1375.19
1225	2822.09	1374.76
1226	2822.08	1374.61
1227	2821.68	1374.32
1228	2821.09	1374.3
1229	2820.77	1373.91
1230	2820.71	1373.9
1231	2820.41	1373.46
1232	2819.42	1373.14
1233	2818.47	1371.98
1234	2818.34	1371.9
1235	2818.32	1371.45
1236	2818.31	1371.05
1237	2817.85	1370.76
1238	2817.53	1370.65
1239	2817.2	1370.54
1240	2816.86	1370.25
1241	2816.8	1370.03
1242	2816.61	1369.93
1243	2816.46	1369.2
1244	2816.28	1368.47
1245	2816.25	1368.35
1246	2816.03	1368.34
1247	2815.84	1368.32
1248	2815.51	1367.47
1249	2815.48	1366.96
1250	2815.15	1366.94
1251	2815.1	1366.87
1252	2815.03	1366.83
1253	2814.99	1366.73
1254	2814.96	1366.61
1255	2814.9	1366.5
1256	2814.61	1366.49
1257	2814.54	1366.45
1258	2814.36	1366.25
1259	2814.12	1366.19
1260	2814.08	1366.17
1261	2813.42	1366.08
1262	2813.04	1365.06
1263	2812.95	1365.03
1264	2812.69	1364.98
1265	2811.67	1364.96
1266	2811.17	1364.88
1267	2811.11	1364.45
1268	2811.1	1364.11
1269	2810.91	1363.76
1270	2810.28	1363.75
1271	2810.23	1363.61
1272	2809.36	1362.63
1273	2809.19	1362.58
1274	2808.93	1361.51
1275	2808.74	1361.28
1276	2808.73	1361.12
1277	2808.13	1360.54
1278	2807.69	1360.26
1279	2807.37	1360.16
1280	2806.95	1359.92
1281	2805.78	1359.91
1282	2805.43	1359.79
1283	2805.33	1359.71
1284	2804.71	1359.51
1285	2804.37	1359.42
1286	2804.24	1359.35
1287	2803.61	1359.18
1288	2803.12	1359.11
1289	2803.03	1358.86
1290	2802.99	1358.33
1291	2802.74	1358.18
1292	2802.64	1357.82
1293	2802.2	1357.71
1294	2801.66	1357.53
1295	2801.51	1356.06
1296	2801.47	1355.39
1297	2801.46	1354.64
1298	2801.21	1353.82
1299	2801.11	1353.67
1300	2801.1	1353.64
1301	2800.89	1353.63
1302	2800.45	1352.75
1303	2800.43	1352.04
1304	2799.91	1351.95
1305	2799.81	1351.7
1306	2799.51	1351.05
1307	2799.32	1350.91
1308	2798.91	1350.45
1309	2798.86	1350.41
1310	2798.81	1350.34
1311	2798.56	1349.79
1312	2798.06	1349.38
1313	2797.53	1348.95
1314	2796.88	1348.91
1315	2796.84	1348.68
1316	2796.83	1348.31
1317	2796.72	1348.24
1318	2796.69	1347.91
1319	2796.56	1347.55
1320	2796.18	1347.52
1321	2796	1347.36
1322	2795.67	1347.35
1323	2795.55	1347.34
1324	2795.2	1347.06
1325	2794.68	1346.51
1326	2794.49	1345.33
1327	2794.38	1345.26
1328	2793.23	1345.23
1329	2793.08	1345.04
1330	2792.77	1344.85
1331	2792.22	1344.82
1332	2792	1344.72
1333	2792	1344.56
1334	2791.98	1344.38
1335	2791.37	1344.09
1336	2790.69	1343.9
1337	2790.52	1343.87
1338	2790.18	1343.82
1339	2789.85	1343.62
1340	2789.4	1343.46
1341	2789.27	1343.45
1342	2788.68	1343.41
1343	2788.18	1343.41
1344	2788.11	1343.3
1345	2787.82	1343.01
1346	2787.64	1342.87
1347	2787.52	1342.61
1348	2787.32	1342.08
1349	2787.32	1341.64
1350	2787.22	1341.55
1351	2787.04	1341.17
1352	2787.03	1340.92
1353	2786.76	1340.81
1354	2786.5	1340.53
1355	2786.44	1340.23
1356	2785.85	1340.17
1357	2785.61	1340.03
1358	2785.25	1339.44
1359	2785.16	1339.21
1360	2784.91	1339.17
1361	2784.91	1338.65
1362	2784.9	1338.6
1363	2784.72	1338.19
1364	2784.51	1337.89
1365	2783.28	1337.79
1366	2783.24	1337.54
1367	2782.76	1337.41
1368	2782.76	1337.21
1369	2782.43	1337.07
1370	2782.33	1337.06
1371	2781.76	1336.67
1372	2781.67	1336.43
1373	2781.61	1336.19
1374	2781.43	1336.1
1375	2781.04	1336.08
1376	2781.01	1335.91
1377	2780.78	1335.89
1378	2780.29	1335.83
1379	2780.12	1335.75
1380	2779.97	1335.49
1381	2779.88	1335.27
1382	2779.45	1335.14
1383	2779.39	1334.44
1384	2779.39	1334.32
1385	2779.35	1334.12
1386	2779.2	1333.85
1387	2778.03	1333.84
1388	2777.86	1333.55
1389	2777.78	1333.3
1390	2777.64	1332.01
1391	2777.38	1331.96
1392	2777.2	1331.61
1393	2776.86	1331.48
1394	2776.83	1331.25
1395	2775.97	1331
1396	2775.64	1330.92
1397	2775.55	1330.86
1398	2775.34	1330.51
1399	2775.28	1330.45
1400	2775.13	1330.34
1401	2775.1	1330.32
1402	2774.94	1330.12
1403	2774.87	1329.75
1404	2774.76	1329.56
1405	2774.21	1329.36
1406	2773.98	1328.97
1407	2773.96	1327.94
1408	2773.8	1327.25
1409	2773.69	1327.09
1410	2772.97	1327.07
1411	2772.92	1326.88
1412	2772.7	1326.67
1413	2771.87	1326.3
1414	2771.87	1326.25
1415	2771.35	1326.2
1416	2771.35	1326.08
1417	2771.28	1325.95
1418	2771.2	1325.88
1419	2770.82	1325.57
1420	2770.75	1325.18
1421	2770.75	1325.18
1422	2770.72	1325.05
1423	2770.6	1325.04
1424	2770.52	1324.95
1425	2769.99	1324.86
1426	2769.72	1324.72
1427	2769.47	1324.44
1428	2769.23	1324.35
1429	2769.06	1324.34
1430	2768.84	1324.27
1431	2768.02	1324.12
1432	2767.67	1323.52
1433	2767.54	1323.49
1434	2767.53	1323.43
1435	2767.51	1323.14
1436	2767.25	1322.6
1437	2767.13	1322.53
1438	2766.41	1322.45
1439	2765.98	1322.18
1440	2765.89	1322.15
1441	2764.45	1321.87
1442	2763.48	1321.76
1443	2763.48	1321.66
1444	2763.41	1321.5
1445	2763.27	1321.48
1446	2763.16	1321.37
1447	2762.9	1320.98
1448	2762.69	1320.86
1449	2762.06	1320.7
1450	2761.46	1320.26
1451	2761.31	1320
1452	2760.86	1319.83
1453	2760.76	1319.71
1454	2760.41	1319.66
1455	2760.35	1319.38
1456	2760.07	1318.98
1457	2759.97	1318.93
1458	2759.49	1318.56
1459	2759.39	1318.52
1460	2758.83	1318.43
1461	2757.95	1318.27
1462	2757.61	1318.1
1463	2757.52	1317.91
1464	2757.43	1317.9
1465	2757.18	1317.56
1466	2757.11	1317.54
1467	2757.05	1317.11
1468	2756.75	1316.94
1469	2756.46	1316.8
1470	2756.41	1316.8
1471	2756.29	1316.8
1472	2756.23	1316.79
1473	2755.89	1316.74
1474	2755.77	1316.64
1475	2755.71	1316.35
1476	2755.38	1316.21
1477	2755.36	1315.92
1478	2754.94	1315.79
1479	2754.35	1315.57
1480	2754	1315.08
1481	2753.64	1314.92
1482	2753.41	1314.83
1483	2753.18	1314.73
1484	2752.82	1314.24
1485	2752.36	1314.14
1486	2752.05	1314.01
1487	2751.95	1313.6
1488	2751.63	1313.25
1489	2751.37	1313.06
1490	2751.29	1312.84
1491	2751.2	1312.81
1492	2751.12	1312.67
1493	2751.11	1312.53
1494	2750.98	1312.48
1495	2750.64	1312.1
1496	2750.51	1311.14
1497	2750.37	1310.84
1498	2750.35	1310.61
1499	2750.17	1310.06
1500	2749.58	1310.05
1501	2748.95	1309.33
1502	2748.85	1309.27
1503	2747.95	1309.12
1504	2747.77	1309.06
1505	2747.76	1308.68
1506	2747.71	1308.61
1507	2747.64	1308.37
1508	2747.51	1307.7
1509	2747.38	1307.7
1510	2747.12	1307
1511	2745.72	1306.92
1512	2745.68	1306.11
1513	2745.38	1306.06
1514	2744.84	1305.84
1515	2744.84	1305.61
1516	2743.86	1305.49
1517	2743.47	1305.24
1518	2743.28	1304.7
1519	2743.2	1304.61
1520	2742.47	1304.44
1521	2741.88	1304.06
1522	2741.73	1303.68
1523	2741.18	1303.62
1524	2740.69	1303.58
1525	2740.22	1303.45
1526	2740.11	1303.34
1527	2740.06	1303.06
1528	2739.93	1302.96
1529	2739.79	1302.93
1530	2739.78	1302.66
1531	2739.59	1302.48
1532	2739.55	1302.24
1533	2739.29	1302.2
1534	2738.73	1302.11
1535	2738.51	1301.72
1536	2738.44	1301.4
1537	2738.34	1301.29
1538	2737.91	1300.77
1539	2737.75	1300.12
1540	2737.74	1299.82
1541	2737.36	1299.65
1542	2737.33	1299.65
1543	2737.29	1299.21
1544	2737.02	1299.19
1545	2736.95	1299.1
1546	2736.07	1298.89
1547	2735.75	1298.84
1548	2735.12	1298.79
1549	2734.75	1298.63
1550	2734.3	1298.51
1551	2734.22	1298.51
1552	2733.79	1298.31
1553	2733.06	1298.29
1554	2732.94	1298.22
1555	2732.77	1297.87
1556	2732.45	1297.85
1557	2731.83	1297.83
1558	2731.52	1297.76
1559	2731.49	1297.72
1560	2730.53	1297.7
1561	2730.47	1297.68
1562	2730.34	1297.07
1563	2730.04	1296.72
1564	2730.03	1296.21
1565	2729.92	1295.8
1566	2729.67	1295.76
1567	2729.49	1295.75
1568	2729.16	1295.64
1569	2729.07	1295.45
1570	2728.59	1295.2
1571	2728.55	1295.12
1572	2728.36	1295.02
1573	2728.18	1294.93
1574	2727.72	1294.55
1575	2727.46	1294.08
1576	2727.4	1294.04
1577	2726.84	1293.69
1578	2726.82	1293.51
1579	2726.74	1293.03
1580	2726.64	1292.89
1581	2726.61	1292.89
1582	2726.36	1292.72
1583	2726.02	1292.6
1584	2726.02	1292.6
1585	2725.89	1292.28
1586	2725.14	1292.06
1587	2724.91	1292
1588	2724.9	1291.31
1589	2724.85	1291.22
1590	2724.85	1291.16
1591	2724.6	1290.68
1592	2724.52	1290.4
1593	2724.31	1290.06
1594	2724.31	1290.05
1595	2724.29	1290.02
1596	2724.29	1289.8
1597	2724.27	1289.65
1598	2723.87	1289.62
1599	2723.25	1289.61
1600	2723.13	1289.56
1601	2723.01	1289.16
1602	2723	1289.03
1603	2722.87	1288.96
1604	2722.15	1288.54
1605	2721.98	1288.51
1606	2721.86	1288.43
1607	2721.67	1288.21
1608	2721.43	1288.15
1609	2721.11	1288.11
1610	2720.49	1288.08
1611	2719.91	1288.05
1612	2719.53	1287.91
1613	2719.23	1287.66
1614	2719.19	1287.49
1615	2719.05	1287.18
1616	2718.76	1286.81
1617	2718.64	1286.8
1618	2718.2	1286.22
1619	2717.9	1286.12
1620	2717.84	1284.23
1621	2717.81	1284.12
1622	2717.74	1283.78
1623	2717.37	1283.71
1624	2716.63	1283.71
1625	2715.95	1283.7
1626	2715.86	1282.97
1627	2715.52	1282.88
1628	2715.14	1282.67
1629	2714.27	1282.58
1630	2714.08	1282.38
1631	2713.97	1282.24
1632	2713.73	1282.08
1633	2713.59	1282.06
1634	2713.4	1281.9
1635	2713.34	1281.63
1636	2713.33	1281.58
1637	2712.89	1281.54
1638	2712.75	1281.5
1639	2712.13	1281.49
1640	2711.98	1281.09
1641	2711.85	1281.04
1642	2711.81	1280.96
1643	2711.75	1280.93
1644	2711.72	1280.54
1645	2711.47	1280.51
1646	2711.45	1280.46
1647	2711.36	1280.4
1648	2711.02	1280.19
1649	2710.55	1279.85
1650	2710.49	1278.04
1651	2710.21	1278.02
1652	2709.94	1277.85
1653	2709.9	1277.82
1654	2709.76	1277.72
1655	2709.6	1277.7
1656	2709.07	1277.54
1657	2708.98	1277.41
1658	2708.73	1277.41
1659	2707.82	1277.14
1660	2707.66	1276.76
1661	2707.52	1276.69
1662	2707.34	1276.54
1663	2707.06	1276.48
1664	2706.91	1276.4
1665	2706.6	1276.38
1666	2706.59	1276.12
1667	2706.29	1275.81
1668	2706.23	1275.61
1669	2705.84	1275.48
1670	2705.73	1275.39
1671	2705.58	1275.08
1672	2705.51	1274.91
1673	2705.36	1274.55
1674	2704.77	1274.31
1675	2704.67	1273.66
1676	2703.97	1273.63
1677	2703.51	1273.61
1678	2702.55	1273.57
1679	2702.47	1273.47
1680	2702.21	1273.33
1681	2702.2	1272.28
1682	2702.12	1272.26
1683	2701.85	1272.15
1684	2701.74	1272.03
1685	2701.69	1272.03
1686	2701.65	1271.95
1687	2701.44	1271.93
1688	2701.36	1271.9
1689	2701.31	1271.61
1690	2700.92	1271.45
1691	2700.81	1271.38
1692	2700.78	1271.36
1693	2700.57	1271.3
1694	2700.45	1271.23
1695	2700.3	1270.64
1696	2700.2	1270.38
1697	2700.03	1270.32
1698	2699.63	1270.18
1699	2699.41	1269.98
1700	2698.54	1269.46
1701	2698.04	1269.33
1702	2697.95	1269.14
1703	2697.92	1268.79
1704	2697.87	1268.12
1705	2697.81	1267.95
1706	2697.56	1267.9
1707	2697.52	1267.61
1708	2697.28	1267.45
1709	2696.42	1267.37
1710	2696.34	1267.37
1711	2696.24	1267.13
1712	2696.1	1266.86
1713	2696.06	1266.66
1714	2696.04	1266.58
1715	2695.99	1266.54
1716	2695.68	1266.38
1717	2695.58	1266.15
1718	2695.38	1265.97
1719	2695.28	1265.8
1720	2694.91	1265.27
1721	2694.62	1265.26
1722	2694.3	1265.25
1723	2693.94	1265.2
1724	2693.65	1264.74
1725	2693.52	1264.66
1726	2693.39	1264.58
1727	2692.89	1264.51
1728	2692.86	1264.42
1729	2692.71	1264.28
1730	2692.7	1263.72
1731	2692.68	1263.68
1732	2692.17	1263.65
1733	2692.07	1262.96
1734	2691.95	1262.56
1735	2691.93	1262.54
1736	2691.64	1262.37
1737	2691.52	1262.34
1738	2691.5	1261.96
1739	2691.11	1261.95
1740	2690.86	1261.87
1741	2690.63	1261.77
1742	2690.53	1261.77
1743	2690.44	1261.23
1744	2690.25	1261.21
1745	2690.12	1261.13
1746	2690	1260.97
1747	2689.29	1260.95
1748	2689.21	1260.76
1749	2689.15	1260.76
1750	2689.02	1260.72
1751	2688.93	1260.41
1752	2688.71	1260.21
1753	2688.61	1259.94
1754	2688.56	1259.9
1755	2688.24	1259.81
1756	2687.97	1259.6
1757	2687.65	1259.51
1758	2687.57	1259.26
1759	2687.55	1258.92
1760	2687.33	1258.65
1761	2687.31	1258.64
1762	2687.25	1258.23
1763	2686.84	1258.14
1764	2685.44	1257.99
1765	2685.05	1257.47
1766	2684.91	1257.4
1767	2684.3	1256.76
1768	2683.97	1256.46
1769	2683.96	1256.44
1770	2683.44	1256.41
1771	2683.21	1256.39
1772	2683.18	1256.18
1773	2682.32	1256.13
1774	2682.2	1255.91
1775	2681.93	1255.69
1776	2681.83	1255.58
1777	2681.82	1255.14
1778	2681.45	1254.95
1779	2681.39	1254.92
1780	2681.16	1254.61
1781	2681.1	1254.45
1782	2680.37	1254.19
1783	2679.73	1254.1
1784	2679.7	1253.98
1785	2679.56	1253.74
1786	2679.5	1253.71
1787	2679.06	1253.67
1788	2678.82	1253.48
1789	2678.25	1253.37
1790	2678.2	1253.09
1791	2678.16	1253.05
1792	2677.93	1252.94
1793	2677.57	1252.86
1794	2677.29	1252.83
1795	2677.07	1252.72
1796	2676.8	1252.59
1797	2676.66	1252.37
1798	2676.61	1252.31
1799	2675.78	1252.24
1800	2675.71	1252.22
1801	2675.58	1251.74
1802	2675.48	1251.44
1803	2675.26	1251.43
1804	2675.2	1251.43
1805	2675.06	1251.18
1806	2674.99	1251.16
1807	2674.94	1250.87
1808	2674.82	1250.65
1809	2674.65	1250.55
1810	2674.55	1250.49
1811	2673.84	1250.43
1812	2673.81	1250.38
1813	2673.33	1250.33
1814	2672.87	1250.28
1815	2672.82	1249.88
1816	2672.21	1249.52
1817	2672.1	1249.32
1818	2672.02	1248.77
1819	2671.83	1248.5
1820	2671.82	1248.49
1821	2671.04	1248.41
1822	2671.02	1248.25
1823	2670.96	1248.17
1824	2670.67	1248.11
1825	2670.28	1248.01
1826	2670.11	1247.91
1827	2669.97	1247.82
1828	2669.93	1247.76
1829	2669.88	1247.68
1830	2669.67	1247.56
1831	2669.49	1247.53
1832	2669.42	1247.48
1833	2669.25	1247.27
1834	2669.05	1247.07
1835	2668.43	1246.9
1836	2668.13	1246.71
1837	2667.84	1246.69
1838	2667.49	1246.69
1839	2666.82	1246.53
1840	2666.49	1246.49
1841	2666.04	1246.35
1842	2665.9	1246.32
1843	2665.83	1246.23
1844	2665.68	1246.09
1845	2665.38	1245.93
1846	2665.12	1245.75
1847	2664.87	1245.71
1848	2664.78	1245.46
1849	2664.68	1245.37
1850	2664.66	1245.35
1851	2664.54	1245.08
1852	2664.12	1244.94
1853	2663.97	1244.55
1854	2663.83	1244.12
1855	2663.77	1243.99
1856	2663.42	1243.97
1857	2663.37	1243.81
1858	2663.34	1243.61
1859	2663.3	1243.56
1860	2663.24	1243.55
1861	2662.55	1243.36
1862	2662.46	1242.82
1863	2662.1	1242.69
1864	2661.99	1242.63
1865	2661.83	1242.61
1866	2661.22	1242.57
1867	2660.65	1242.47
1868	2660.6	1242.33
1869	2660.51	1242.3
1870	2659.72	1242.3
1871	2659.7	1242.27
1872	2659.6	1242.26
1873	2659.59	1241.74
1874	2659.53	1241.63
1875	2659.5	1241.59
1876	2659.02	1241.59
1877	2658.99	1241.42
1878	2658.95	1241.36
1879	2658.53	1241.33
1880	2658.47	1241.32
1881	2657.89	1241.24
1882	2657.26	1240.7
1883	2656.41	1240.46
1884	2656.4	1240.28
1885	2656.17	1240.25
1886	2655.95	1240.18
1887	2655.88	1240.01
1888	2655.21	1239.6
1889	2654.7	1239.59
1890	2654.7	1239.39
1891	2654.59	1239.38
1892	2654.56	1239.26
1893	2654.38	1238.87
1894	2654.34	1238.62
1895	2654.15	1238.53
1896	2654.1	1238.46
1897	2654.1	1238.22
1898	2653.81	1238.22
1899	2653.69	1237.78
1900	2653.37	1237.58
1901	2652.44	1237.46
1902	2652.43	1236.83
1903	2652.4	1236.7
1904	2652.31	1236.68
1905	2652.26	1236.59
1906	2652.14	1236.27
1907	2651.63	1235.91
1908	2651.61	1235.74
1909	2651.57	1235.68
1910	2651.53	1235.46
1911	2651.42	1235.25
1912	2650.5	1235.25
1913	2650.37	1234.53
1914	2649.93	1234.4
1915	2649.86	1234.21
1916	2649.5	1234.13
1917	2649.41	1233.69
1918	2649.12	1233.64
1919	2649.09	1233.6
1920	2648.96	1233.3
1921	2648.78	1233.23
1922	2648.72	1233.19
1923	2648.69	1233.06
1924	2648.5	1232.99
1925	2648.37	1232.96
1926	2647.97	1232.94
1927	2647.9	1232.75
1928	2647.59	1232.71
1929	2647.54	1232.71
1930	2647.19	1232.47
1931	2646.8	1231.94
1932	2646.76	1231.92
1933	2646.68	1231.54
1934	2646.47	1231.53
1935	2646.21	1231.49
1936	2646.06	1231.43
1937	2645.8	1230.99
1938	2645.78	1230.83
1939	2645.58	1230.63
1940	2645.33	1230.48
1941	2645.21	1230.14
1942	2644.91	1229.99
1943	2644.87	1229.9
1944	2644.61	1229.78
1945	2644.27	1229.43
1946	2644.07	1229.04
1947	2644.07	1229.03
1948	2644.07	1229
1949	2643.96	1228.38
1950	2643.83	1228.17
1951	2643.79	1228.05
1952	2643.79	1228.04
1953	2643.76	1227.89
1954	2643.27	1227.7
1955	2643.22	1227.6
1956	2643.18	1227.59
1957	2642.54	1227.52
1958	2642.31	1227.13
1959	2642.31	1226.48
1960	2642.22	1226.39
1961	2641.87	1226.22
1962	2641.74	1225.73
1963	2641.7	1225.73
1964	2641.56	1225.63
1965	2641.25	1225.61
1966	2641.21	1225.58
1967	2641.2	1225.52
1968	2641.18	1225.14
1969	2640.99	1225.06
1970	2640.59	1224.75
1971	2639.84	1224.58
1972	2639.79	1224.49
1973	2638.9	1224.45
1974	2638.89	1224.07
1975	2638.78	1223.92
1976	2638.72	1223.6
1977	2638.13	1223.04
1978	2637.99	1222.97
1979	2637.99	1221.93
1980	2637.88	1221.36
1981	2637.81	1221.07
1982	2637.74	1220.6
1983	2637.55	1220.21
1984	2637.47	1220
1985	2636.97	1219.81
1986	2636.64	1219.38
1987	2635.8	1219.15
1988	2635.77	1219.1
1989	2635.44	1218.52
1990	2635.22	1218.49
1991	2634.34	1217.95
1992	2634.32	1217.9
1993	2634.3	1217.87
1994	2634.23	1217.87
1995	2633.66	1217.85
1996	2633.53	1217.77
1997	2633.46	1217.7
1998	2633.38	1217.55
1999	2633.07	1217.39
[truncated: 15,658 more rows]

## Sheet: Putative interaction partners
Gene name	Log2LFQ (Even+Odd/LacZ)
CRABP1	28.4051
NDNF	25.367
MDH1	24.3275
RPL23A	23.3957
RPL29	23.1721
ERCC6L2	23.1668
HBA1;HBA2	23.1608
RPL18	23.0603
LIN28A	22.8951
CCT3	22.7655
HIST1H1E;HIST1H1D	22.3541
AZGP1	22.2009
ALDOB	21.9574
KRT6B	21.8874
HNRNPA1	21.6795
HNRNPU	21.642
S100A9	21.624
VCL	21.5467
BHMT;BHMT2	21.4876
MAGEE1	21.448
ENO1	21.4162
ACTB	21.399
JUP	21.3142
HSD17B4	21.2527
RPS11	21.2258
ANXA2	21.2247
GNB2L1	21.1934
MDH2	21.1207
RPS8	21.0199
RPL14	20.9629
TUBB2B	20.9515
RPS10;RPS10P5	20.9446
TUBB2A	20.9213
RPL11	20.8225
YWHAG	20.7877
HNRNPK	20.7609
HNRNPH1;HNRNPH2	20.6893
FSCN1	20.6597
S100A8	20.5837
RBBP4	20.5454
DSC1	20.5104
RPL5	20.456
RPL15	20.4503
MAT1A	20.4445
RPS5	20.4215
YWHAB	20.3057
PHGDH	20.2805
FABP5	20.2757
ACTN4;ACTN1	20.1951
RCC2	20.1816
LMNB1	20.1808
PAICS	20.1768
PPIA	20.1672
CCT4	20.0873
RPS12	20.0824
HNRNPM	19.9589
CALD1	19.9479
SND1	19.9452
SYNCRIP;HNRNPR	19.9425
PARP1	19.9259
LDHB	19.8799
RRBP1	19.6777
MYH9	19.6693
RPL24	19.669
RPL18A	19.6483
MTHFD1	19.6446
CRYZL1	19.6414
RPS4X;RPS4Y2	19.633
HSPE1;HSPE1-MOB4	19.5631
HSD17B10	19.5357
RPL3	19.5315
EIF4A1	19.4838
ALDOA	19.4677
AHCY	19.3883
RPL31	19.3577
NCCRP1	19.3548
HMGA1	19.3015
TKT	19.2725
FUBP1	19.2696
MCM3	19.2371
HNRNPD	19.2308
LRPPRC	19.2209
SERBP1	19.2195
SERPINH1	19.2144
PRDX2	19.2121
MSN	19.197
YWHAQ	19.1608
PABPC1;PABPC4	19.1106
SEPT7;DKFZp586I031	19.0911
EIF2S1	19.0266
RPL35	19.0163
IGKC	18.9854
DBN1	18.9562
DAK	18.9396
ARCN1	18.9307
KPRP	18.9175
ACTG2;ACTA1;ACTC1;ACTA2	18.8911
CALML3	18.8335
LASP1	18.7931
LGALS7	18.785
SPTBN1	18.7554
SUMO3;SUMO4;SUMO2	18.7472
EIF2S3L;EIF2S3	18.7005
SERPINB9	18.6078
L1TD1	18.5937
ILF2	18.5717
SUGT1	18.5707
CAPZA2	18.5564
CAD	18.5552
APEX1	18.5436
P4HB	18.5311
NONO	18.5099
PA2G4	18.4694
G3BP2	18.3765
ACLY	18.292
SFN	18.2445
TMPO	18.215
CAT	18.2072
SUPT16H	18.1839
PGK1;PGK2	18.0521
ASL	18.0364
RPS13	17.9926
DHX9	17.9701
NME1;NME2;NME1-NME2	17.9515
RUVBL2	17.8846
RGN	17.8254
RPS6	17.8112
PRKDC	17.7324
PTMA	17.706
PDIA3	17.6851
APOD	17.676
H1F0	17.6681
PSME3	17.6341
TGM1	17.5574
GNMT	17.5002
RPL4	17.3721
SELENBP1	17.1625
HSP90B1	17.1611
ACAT2	17.1528
	17.0843
SERPINB12	17.0488
TAF15;FUS	16.6423
MARCKSL1	16.5747
KPNA2	16.5407
VARS	16.4453
EIF3I	16.3322
NPM3	16.1185
RPS3	1.33112
HNRNPA2B1	1.13105
RPL8	0.871464
RAN	0.869518
RPL6	0.653233
EEF2	0.513954
RPL7	0.476263
RPS7	0.465749
HNRNPC	0.462678
PRDX1	0.409612
RPS20	0.370611
RPL13A;RPL13a;RPL13AP3	0.336652
TRIM28	0.330029
RPL7A	0.284614
EEF1A1P5;EEF1A1;EEF1A2	0.264186
RPLP2	0.250204
TUBA1B;TUBA1C;TUBA1A;TUBA3E;TUBA8;TUBA4A	0.229006
TUBB4B;TUBB4A	0.228096
ARG1	0.19868
HSPA9	0.1574
EEF1D	0.147647
YWHAZ	0.10243
PKM	0.0919817
NPM1	0.0803826
HIST1H1B	0.0686795
TPM3	0.0655333
RPS18	0.0643322
TUBB;TUBB3	0.0400557
RPS14	0.028583
CCT8	0.0248621
FLNA	0.01526
HSPA4	0
ADH1C;ADH1B;HEL-S-117;ADH1A	0
DDX5;DDX17	0
DYNC1H1	0
MCM4	0
MLLT4	0
RPS3A	0
WDR1	0
KLHL7	0
FLNB	0
TIMM8B	0
PHB2	0
ENO2	0
RPLP0	0
CKB	0
MCM2	0
EIF4A3	0
PYCR1	0
FARSA	0
PGD	0
RPL27	0
IDH1	0
ALDH1L1	0
ANXA1	0
DBI	0
EEF1B2	0
RPS27	0
ALDH9A1	0
KCNB1	0
SF3B4	0
PKD2L1	0
TLN1	0
HSP90AB1	-0.0101937
CALML5	-0.0195901
GAPDH	-0.0525569
HIST1H1C	-0.0627052
TCP1	-0.0638502
FASN	-0.0893201
HSPD1	-0.0900674
ATP5A1	-0.10358
CFL1	-0.114108
UBC;UBB;RPS27A;UBA52	-0.114658
DSG1	-0.122124
ACTG1	-0.150017
TGM3	-0.169878
DCD	-0.18241
HMGN2;HMGN3	-0.190642
HSPA8	-0.229508
ATP5B	-0.235335
YBX1	-0.257468
NCL	-0.32252
HIST1H2BD;HIST1H2BC;HIST2H2BF;HIST1H2BH;HIST1H2BN;HIST1H2BM;HIST1H2BK;H2BFS;HIST1H2BL;HIST1H2BO;HIST1H2BB;HIST1H2BJ;HIST2H2BE;HIST3H2BB	-0.339153
RPSA	-0.363988
IGHG1;IGHG3	-0.413592
NACA	-0.460309
IGF2BP1	-0.475025
RPL22	-0.503133
XRCC6	-0.517665
SBSN	-0.518462
H3F3B;H3F3A;HIST2H3A;HIST1H3A;HIST3H3;HIST2H3PS2;H3F3C	-0.525132
TPM4	-0.555231
GOT2	-0.596131
HIST1H4A	-0.607971
DSP	-0.654251
ILF3	-0.696946
YWHAE	-0.753403
CLTC	-0.779407
HIST1H2AD;HIST1H2AG;HIST1H2AH;H2AFJ;HIST2H2AC;HIST2H2AA3;HIST1H2AJ;HIST1H2AB;HIST1H2AC;HIST3H2A;HIST1H2AA;H2AFX	-0.782663
RPL13	-0.783404
PRDX3	-0.78657
EEF1G	-0.876703
SFPQ	-0.907464
PCBP2;PCBP3;PCBP1	-1.05313
CSTA	-1.17195
HSPA5	-1.2575
SLTM	-18.3554
CCT6A	-18.9983
TPM3	-19.1778
PRH1	-19.6558
HSPA1L	-19.8567
LCN1	-19.9926
CRNN	-20.0684
HTRA2	-20.2048
LYZ	-20.2728
ACTBL2	-20.2977
KRT18	-20.3299
PABPN1	-20.7263
HMGA2	-20.8322
HSPA7;HSPA6;HSPA1B;HSPA1A	-21.0802
PSMB6	-21.4207
RPL17;RPL17-C18orf32	-21.5398
RPS26;RPS26P11	-21.5926
MYL6;MYL6B	-21.9617
CASP14	-23.0023
PCDHGC3	-23.3848
PRAME	-23.5217
FAM200A	-29.5326
PCNXL2	-29.8516
EXOC3L2	-33.8777
